# Supplementary material for: Tandem catalytic oxidative deacetylation of acetoacetic esters and heteroaromatic cyclizations
Source: Royal Society of Chemistry journal article supplement (doi:10.1039/c4ob02441a), 2014-12-22

Supplementary Information for

Tandem Catalytic Oxidative Deacetylation of  
Acetoacetic Esters and Hetero Aromatic Cyclizations

Yeming Ju,<sup>a,b</sup> Di Miao,<sup>a,b</sup> Ruiyang Yu<sup>a,b</sup> and Sangho Koo\*<sup>a,b,c</sup>

<sup>a</sup>School of Pharmacy, East China University of Science and Technology, Meilong Road 130, Shanghai, 200237, China, <sup>b</sup>Department of Energy and Biotechnology, <sup>c</sup>Department of Chemistry, Myong Ji University, Myongji-Ro 116, Cheoin-Gu, Yongin, Gyeonggi-Do, 449-728, Korea.

sangkoo@mju.ac.kr

Prof. Sangho Koo, phone: +82-31-330-6185, fax: +82-31-335-7248

[<sup>1</sup>H/<sup>13</sup>C NMR spectra for the new compounds]

JYM-467

Sample: JYM-467  
Sample ID: s\_43\_JYM-467\_koo-4\_20130128\_01  
File: /home/walkup2/vnmrsys/data/koo-4/JYM-467\_Proton\_01.fid

Pulse Sequence: s2pu1  
Solvent: cdCl3  
Ambient temperature  
Sample #43, Operator: walkup2  
File: JYM-467\_Proton\_01  
VNMRS-400 "400MR"

Relax. delay 1.000 sec  
Pulse 45.0 degrees  
Acq. time 2.049 sec  
Width 6410.3 Hz  
8 repetitions  
OBSERVE H1, 400.0340074 MHz  
DATA PROCESSING  
Line broadening 0.5 Hz  
FT size 65536  
Total time 0 min, 31 sec

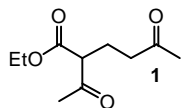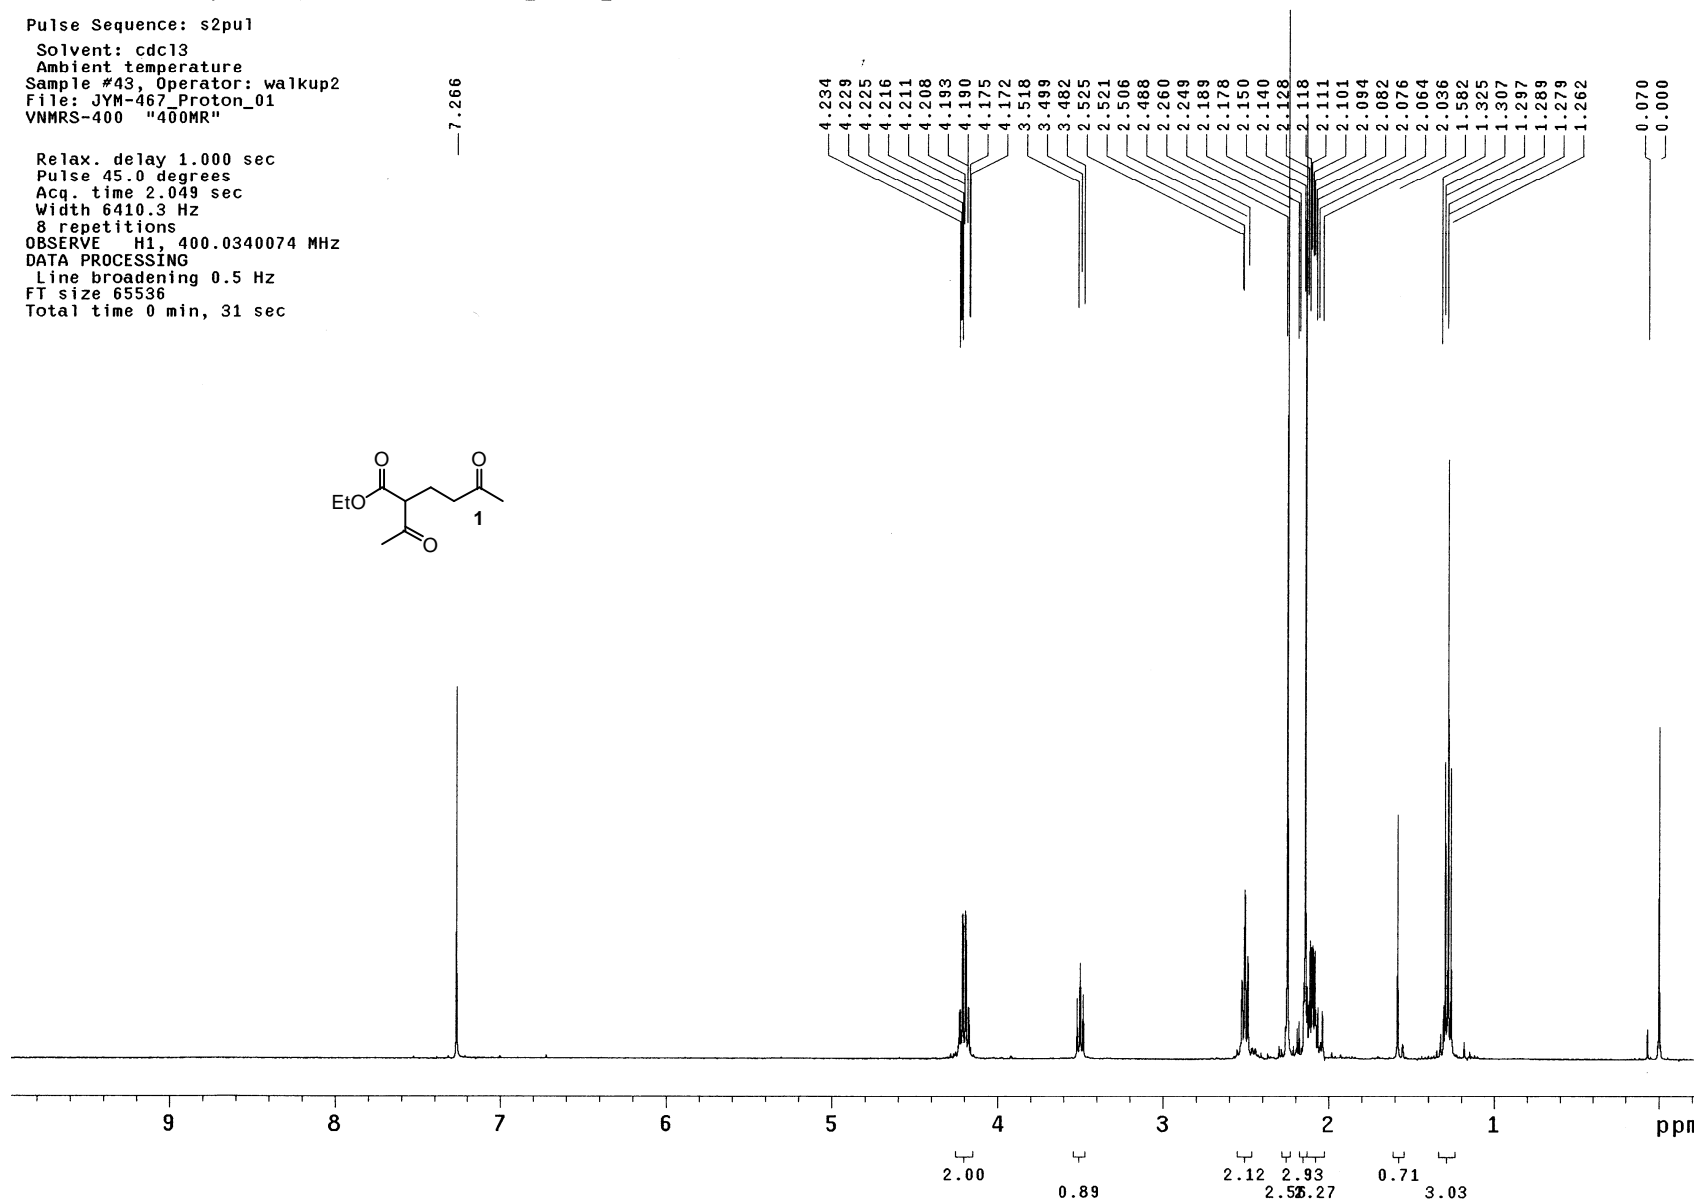

JYM-460

Sample: JYM-460  
Sample ID: s\_42\_JYM-460\_koo-4\_20130123\_01  
File: /home/walkup2/vnmr/sys/data/koo-4/JYM-460\_Proton\_01.fid

Pulse Sequence: s2pu1  
Solvent: cdc13  
Ambient temperature  
Sample #42, Operator: walkup2  
File: JYM-460\_Proton\_01  
VNMRs-400 "400MR"

Relax. delay 1.000 sec  
Pulse 45.0 degrees  
Acq. time 2.049 sec  
Width 6410.3 Hz  
8 repetitions  
OBSERVE H1, 400.0340074 MHz  
DATA PROCESSING  
Line broadening 0.5 Hz  
FT size 65536  
Total time 0 min, 31 sec

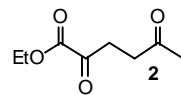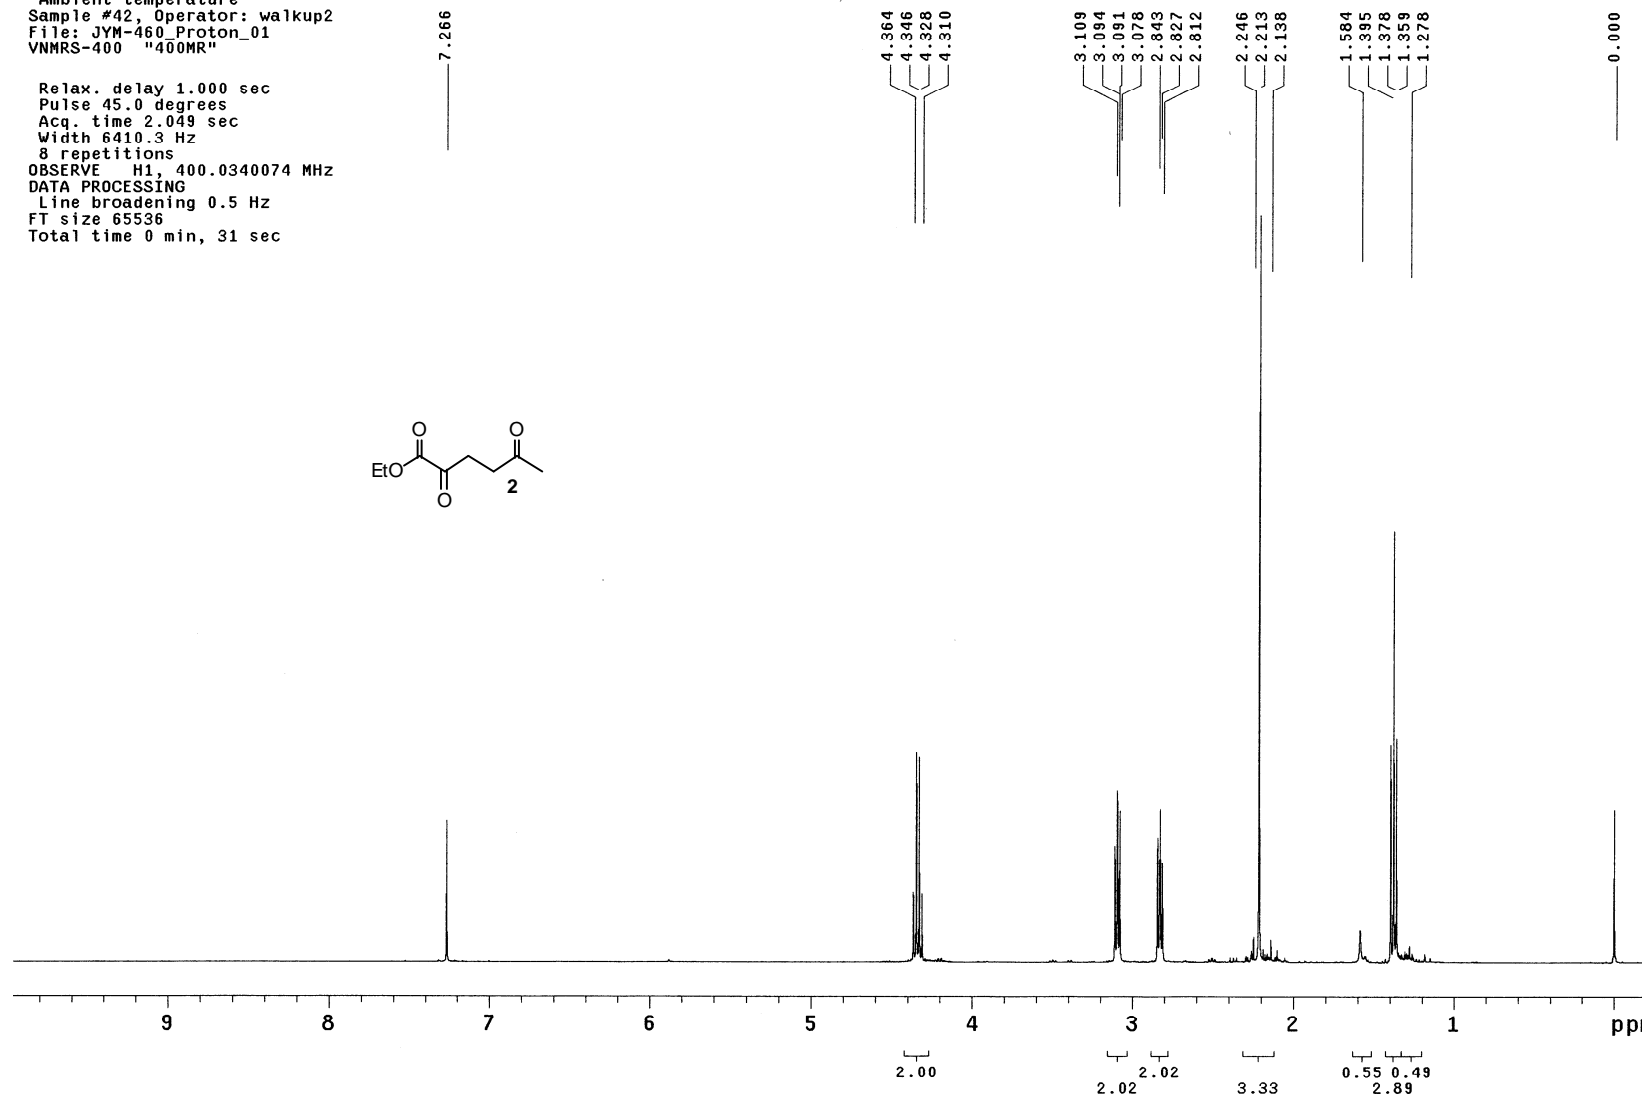

JYM-686-2

Sample: JYM-686-2  
Sample ID: s\_41\_JYM-686-2\_koo-4\_20130619\_01  
File: /home/walkup2/vnmrsys/data/koo-4/JYM-686-2\_Proton\_01.fid

Pulse Sequence: s2pu1  
Solvent: cdcl3  
Ambient temperature  
Sample #41, Operator: walkup2  
File: JYM-686-2\_Proton\_01  
VNMR-400 "400MR"

Relax. delay 1.000 sec  
Pulse 45.0 degrees  
Acq. time 2.049 sec  
Width 6410.3 Hz  
8 repetitions  
OBSERVE H1, 400.0340078 MHz  
DATA PROCESSING  
Line broadening 0.5 Hz  
FT size 65536  
Total time 0 min, 31 sec

7.265

4.287  
4.270  
4.252  
4.234  
4.222

2.539  
2.521  
2.503  
2.356  
2.338  
2.319  
2.292  
2.247  
2.235  
2.228  
2.210  
2.192  
2.173  
2.149  
1.591  
1.517  
1.299  
1.281

0.000

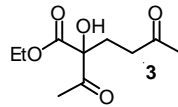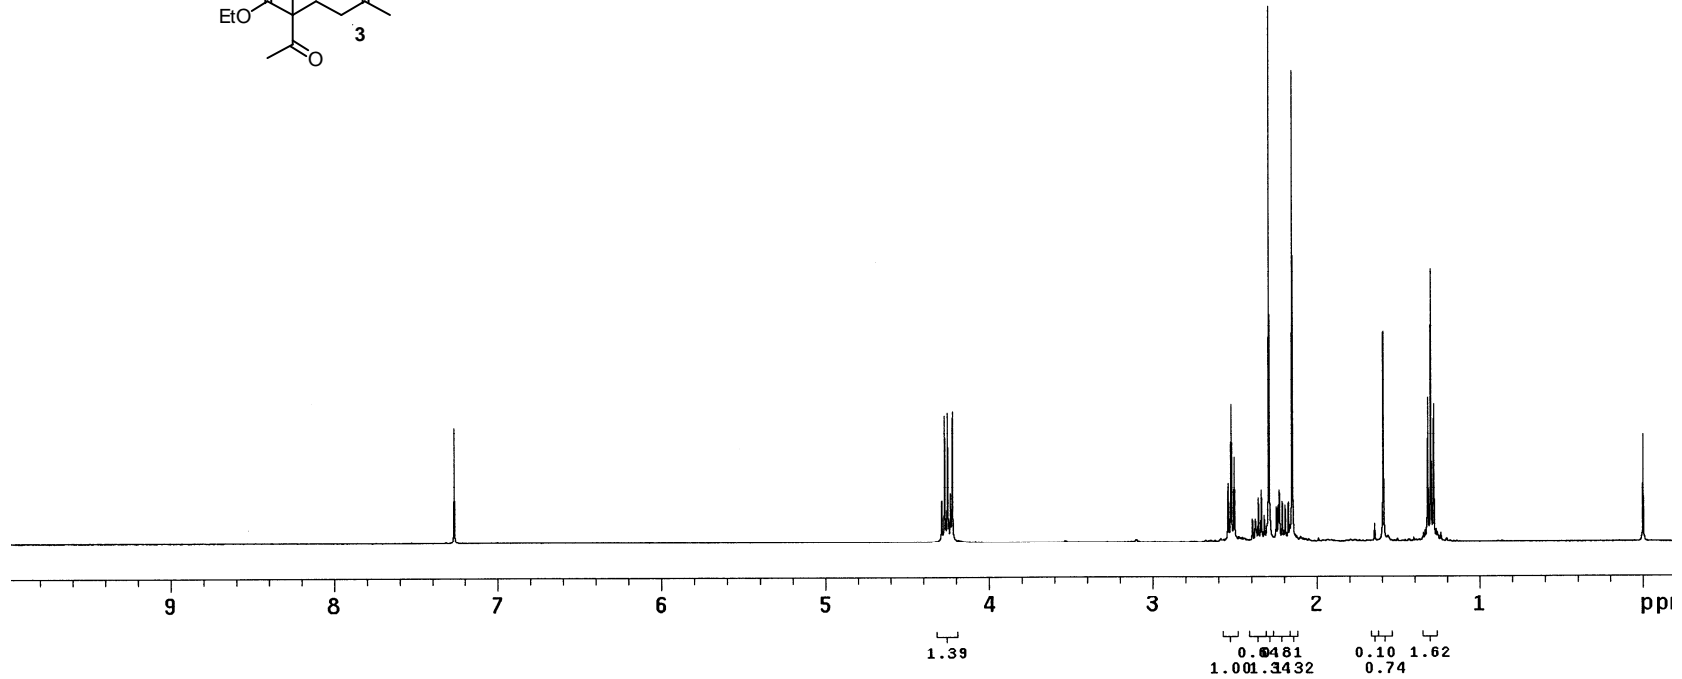

JYM-680-2-c

Sample: JYM-680-2-c  
Sample ID: s\_42\_JYM-680-2-c\_koo-4\_20130620\_01  
File: /home/walkup2/vnmrsys/data/koo-4/JYM-680-2-c\_Carbon\_01.fid

Pulse Sequence: s2pul

Solvent: cdc13  
Ambient temperature  
Sample #422 Operator: walkup2  
File: JYM-680-2-c\_Carbon\_01  
VNMRS-400 "400MR"

Relax. delay 1.000 sec  
Pulse 45.0 degrees  
Acq. time 1.300 sec  
Width 24509.8 Hz  
128 repetitions  
OBSERVE C13, 100.5886392 MHz  
DECOUPLE H1, 400.0360169 MHz  
Power 42 dB  
continuously on  
WALTZ-16 modulated  
DATA PROCESSING  
Line broadening 0.5 Hz  
FT size 65536  
Total time 4 min, 56 sec

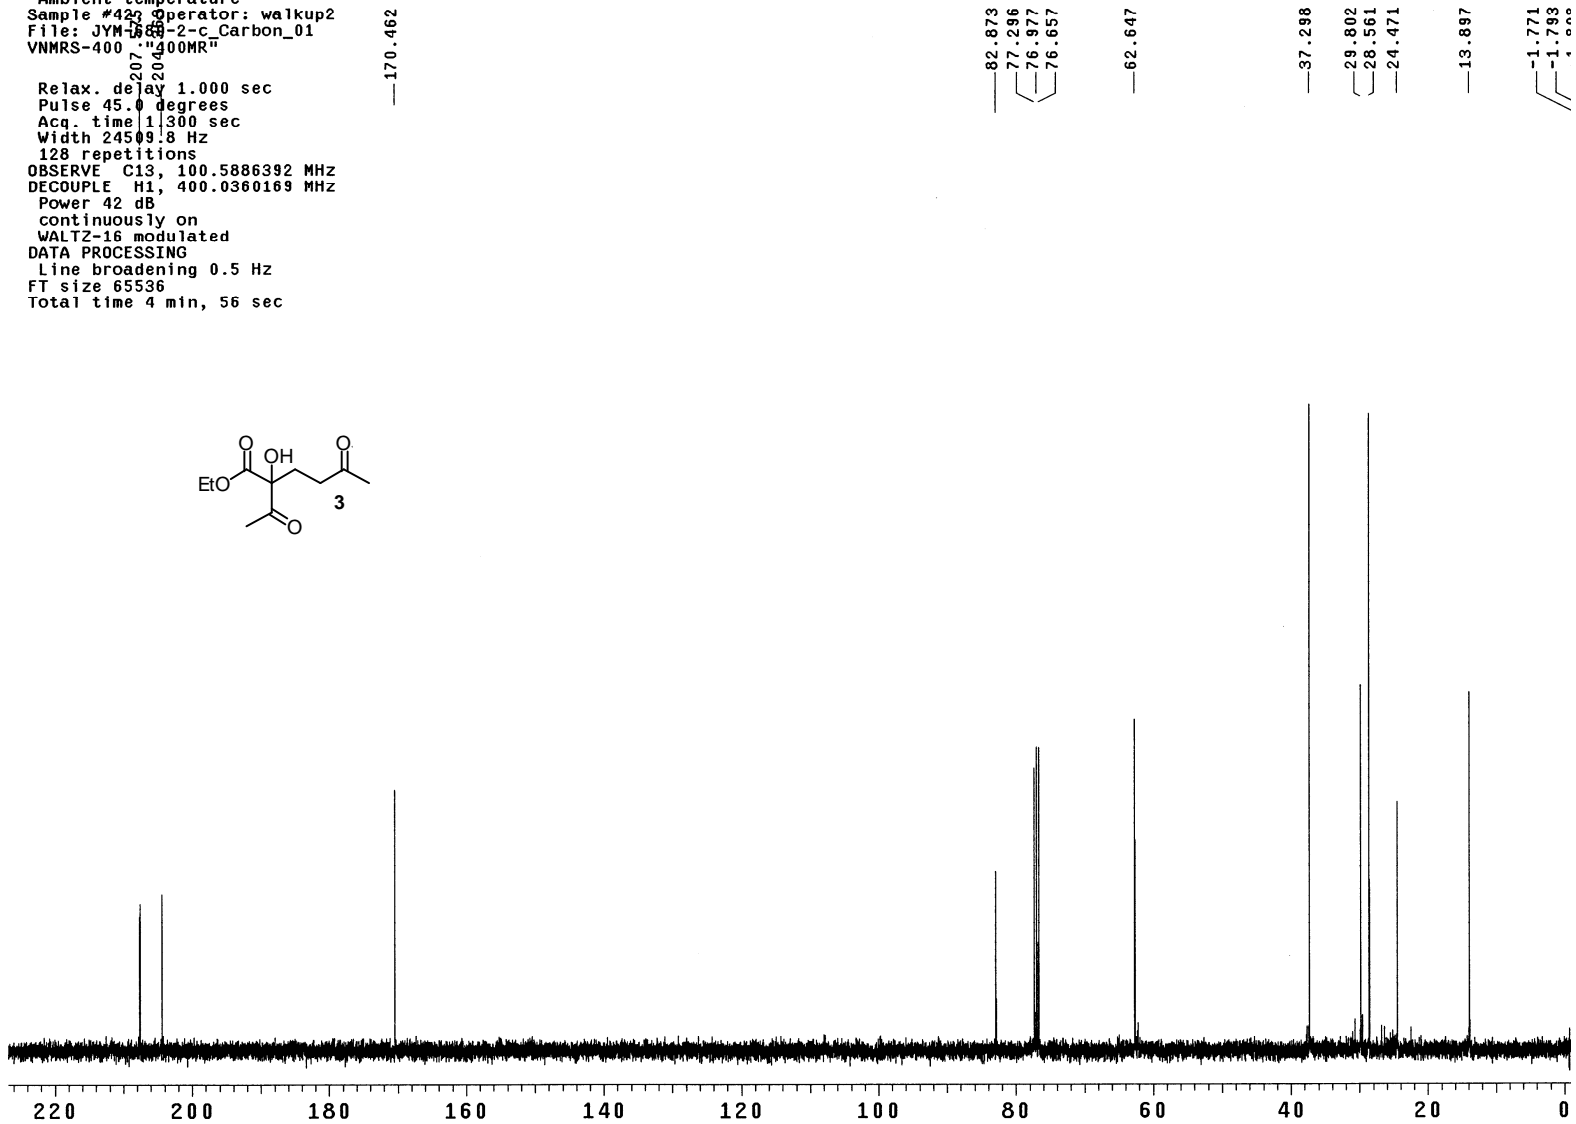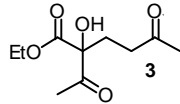

Sample: MD-299  
 Sample ID: s\_40\_MD-299\_koo-4\_20140421\_01  
 File: /home/walkup2/vnmrsys/data/koo-4/MD-299\_Proton\_03.fid

Pulse Sequence: s2pu1  
 Solvent: cdc13  
 Ambient temperature  
 Sample #40, Operator: walkup2  
 File: MD-299\_Proton\_03  
 VNMRS-400 "400MR"

Relax. delay 1.000 sec  
 Pulse 45.0 degrees  
 Acq. time 2.049 sec  
 Width 6830.6 Hz  
 8 repetitions  
 OBSERVE H1, 400.0340075 MHz  
 DATA PROCESSING  
 Line broadening 0.5 Hz  
 FT size 65536  
 Total time 0 min, 31 sec

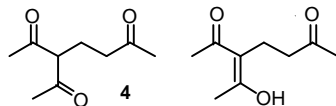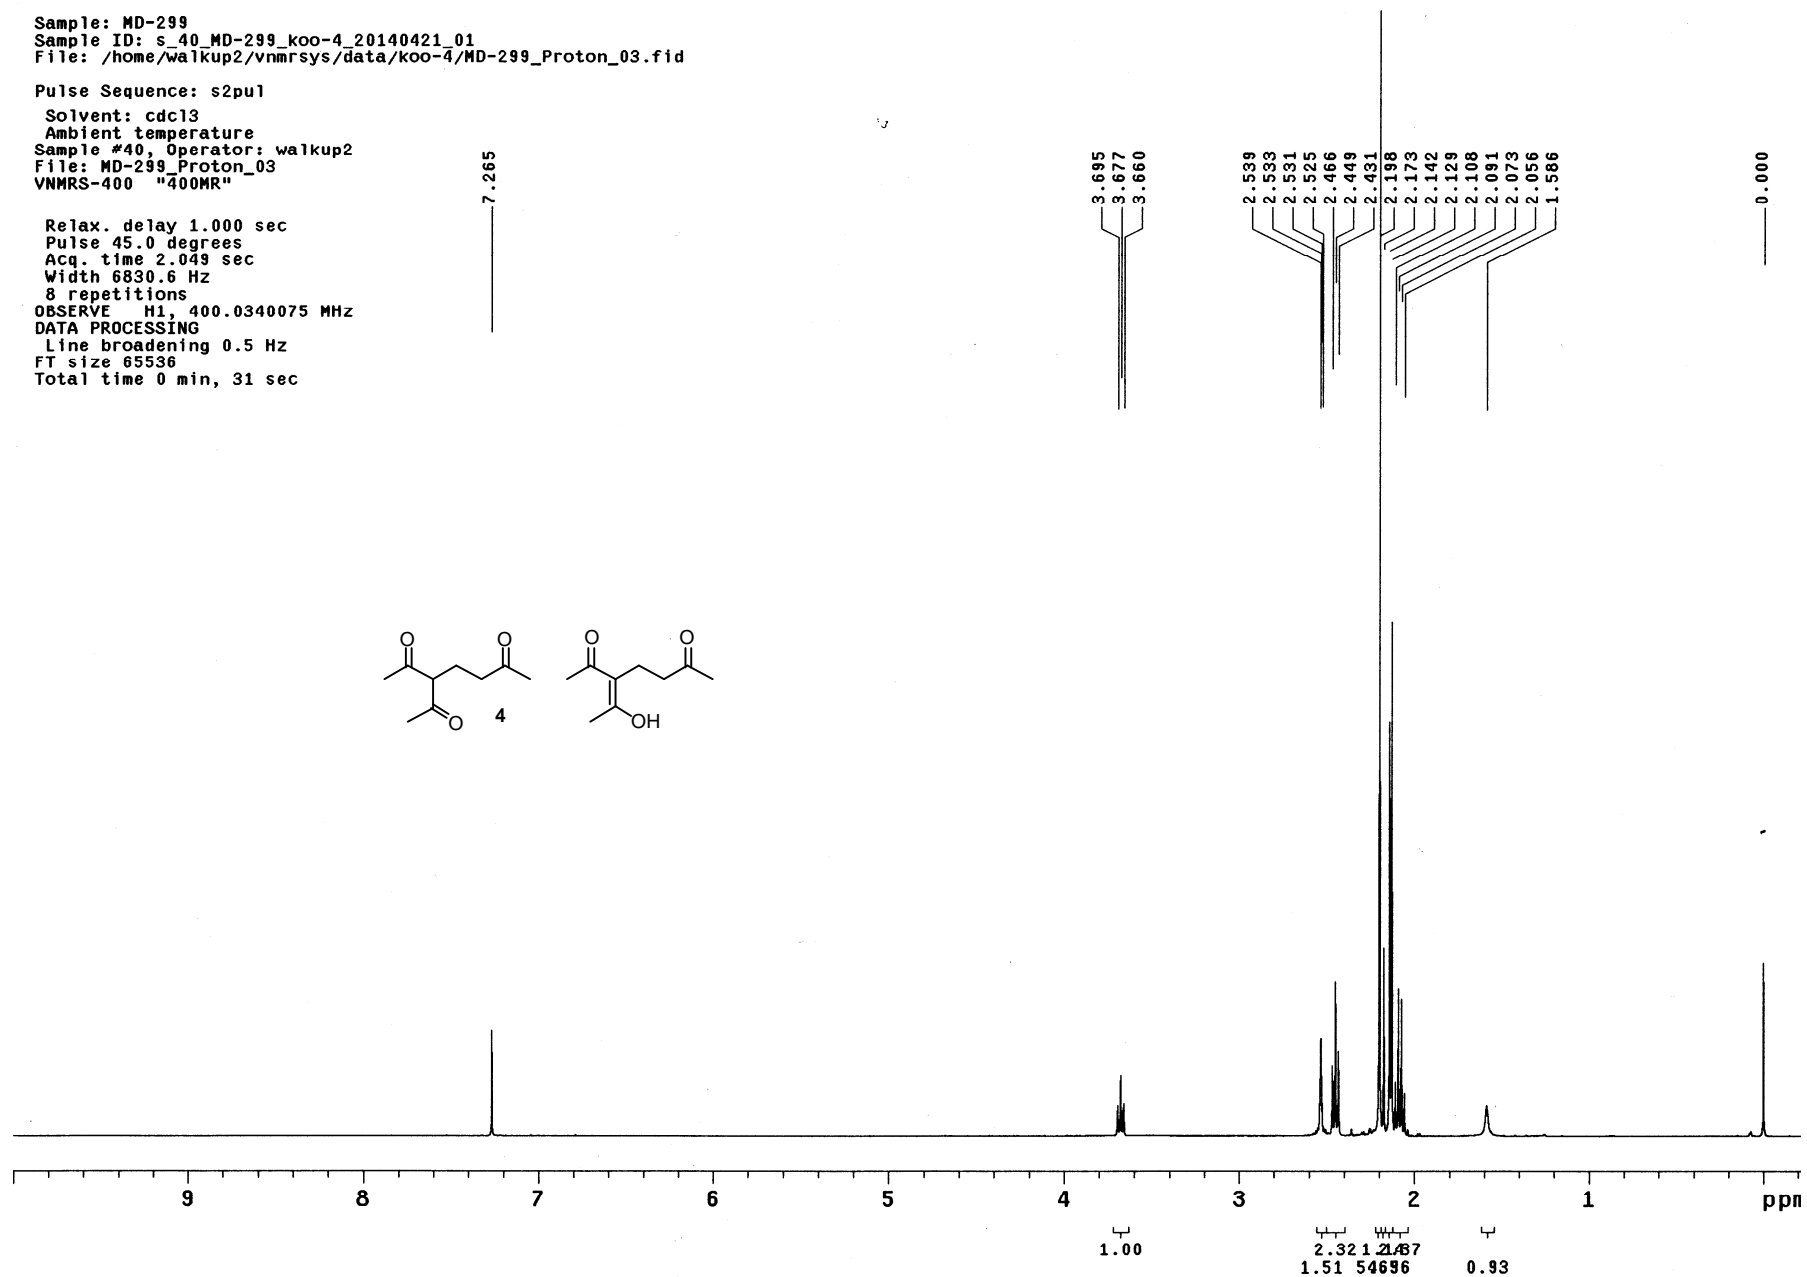

Sample: MD-299  
Sample ID: s\_42\_MD-299\_koo-4\_20140422\_01  
File: /home/walkup2/vnmrsys/data/koo-4/MD-299\_Carbon\_01.fid

Pulse Sequence: s2pu1  
Solvent: cdc13  
Ambient temperature  
Sample: 742 Operator: walkup2  
File: MD-299\_Carbon\_01  
VNMR-200 "400MR"  
Relax delay 1.000 sec  
Pulse 45.0 degrees  
Acq. time 1.300 sec  
Width 24509.8 Hz  
128 repetitions  
OBSERVE C13, 100.5886433 MHz  
DECOUPLE H1, 400.0360169 MHz  
Power 42 dB  
continuously on  
WALTZ-16 modulated  
DATA PROCESSING  
Line broadening 0.5 Hz  
FT size 65536  
Total time 4 min, 56 sec

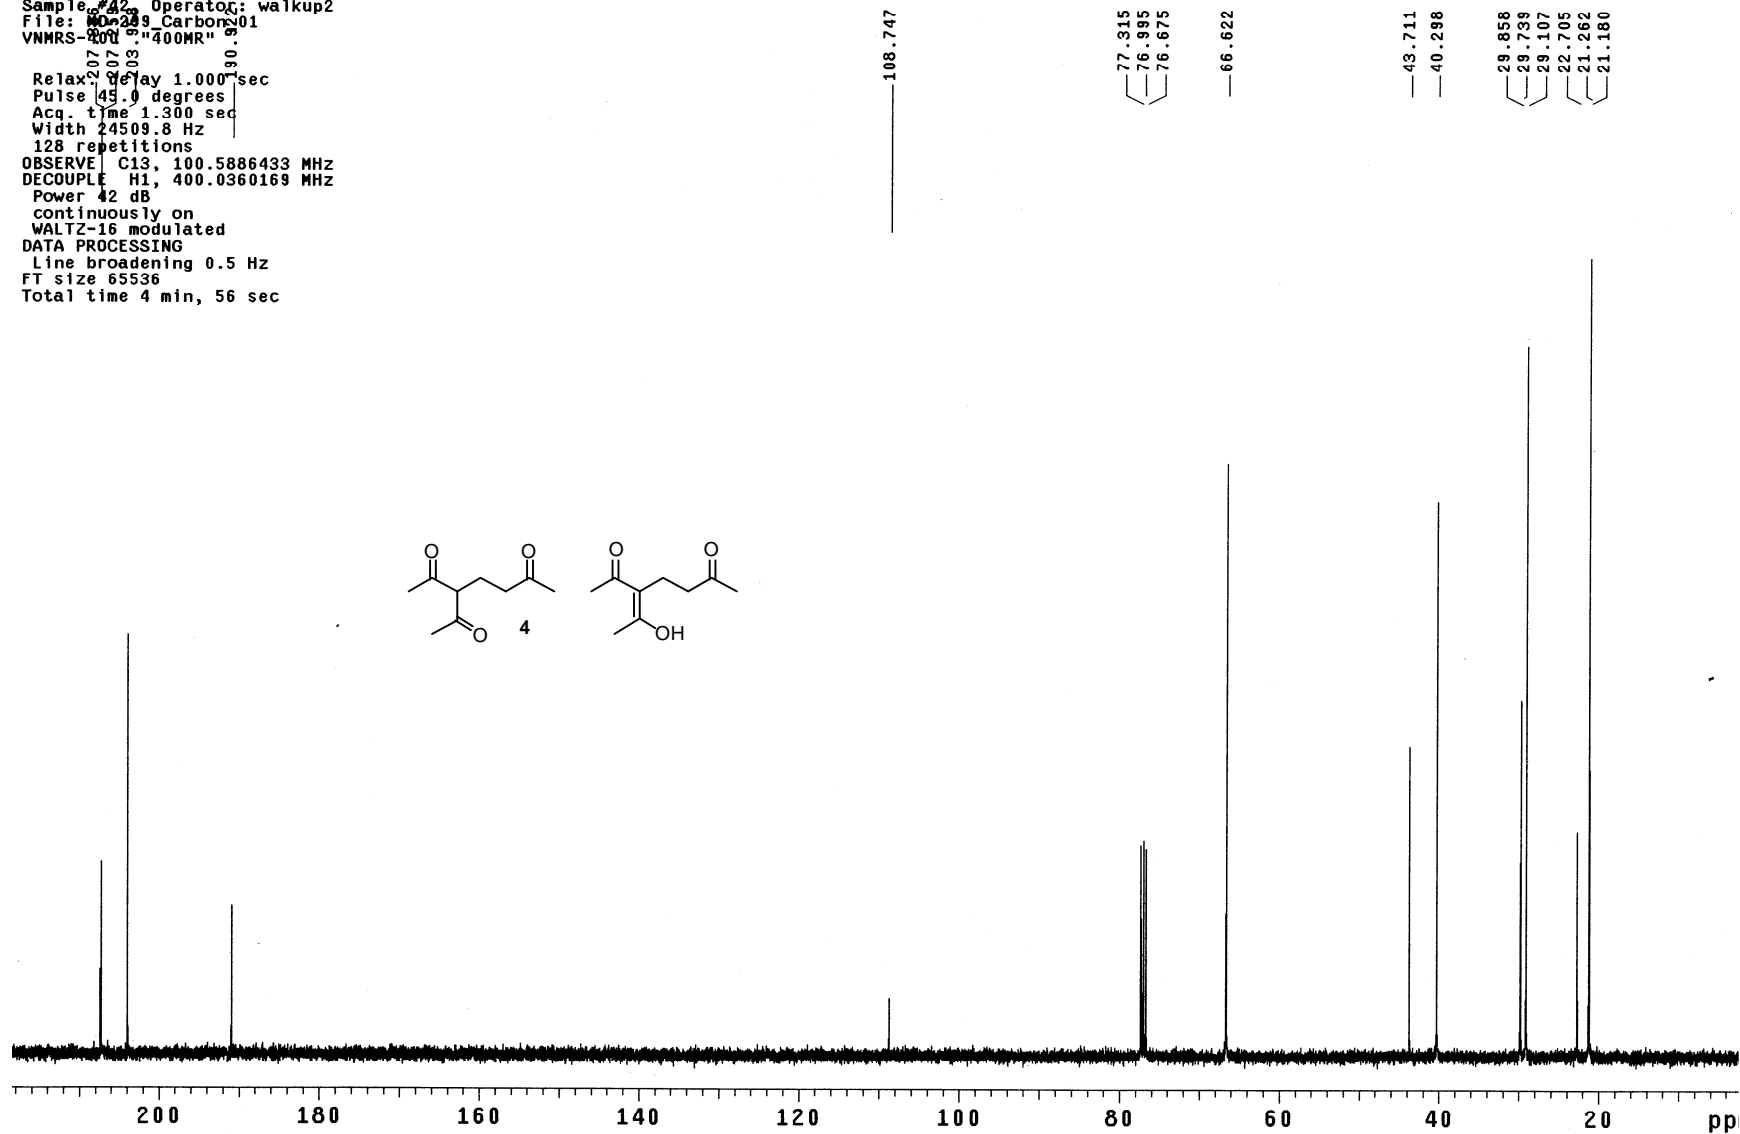

JYM-567

Sample: JYM-567  
Sample ID: s\_41\_JYM-567\_koo-4\_20130408\_01  
File: /home/walkup2/vnmrsys/data/koo-4/JYM-567\_Proton\_01.fid

Pulse Sequence: s2pu1  
Solvent: cdc13  
Ambient temperature  
Sample #41, Operator: walkup2  
File: JYM-567\_Proton\_01  
VNMR-400 "400MR"

Relax. delay 1.000 sec  
Pulse 45.0 degrees  
Acq. time 2.049 sec  
Width 6410.3 Hz  
8 repetitions  
OBSERVE H1, 400.0340080 MHz  
DATA PROCESSING  
Line broadening 0.5 Hz  
FT size 65536  
Total time 0 min, 31 sec

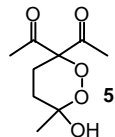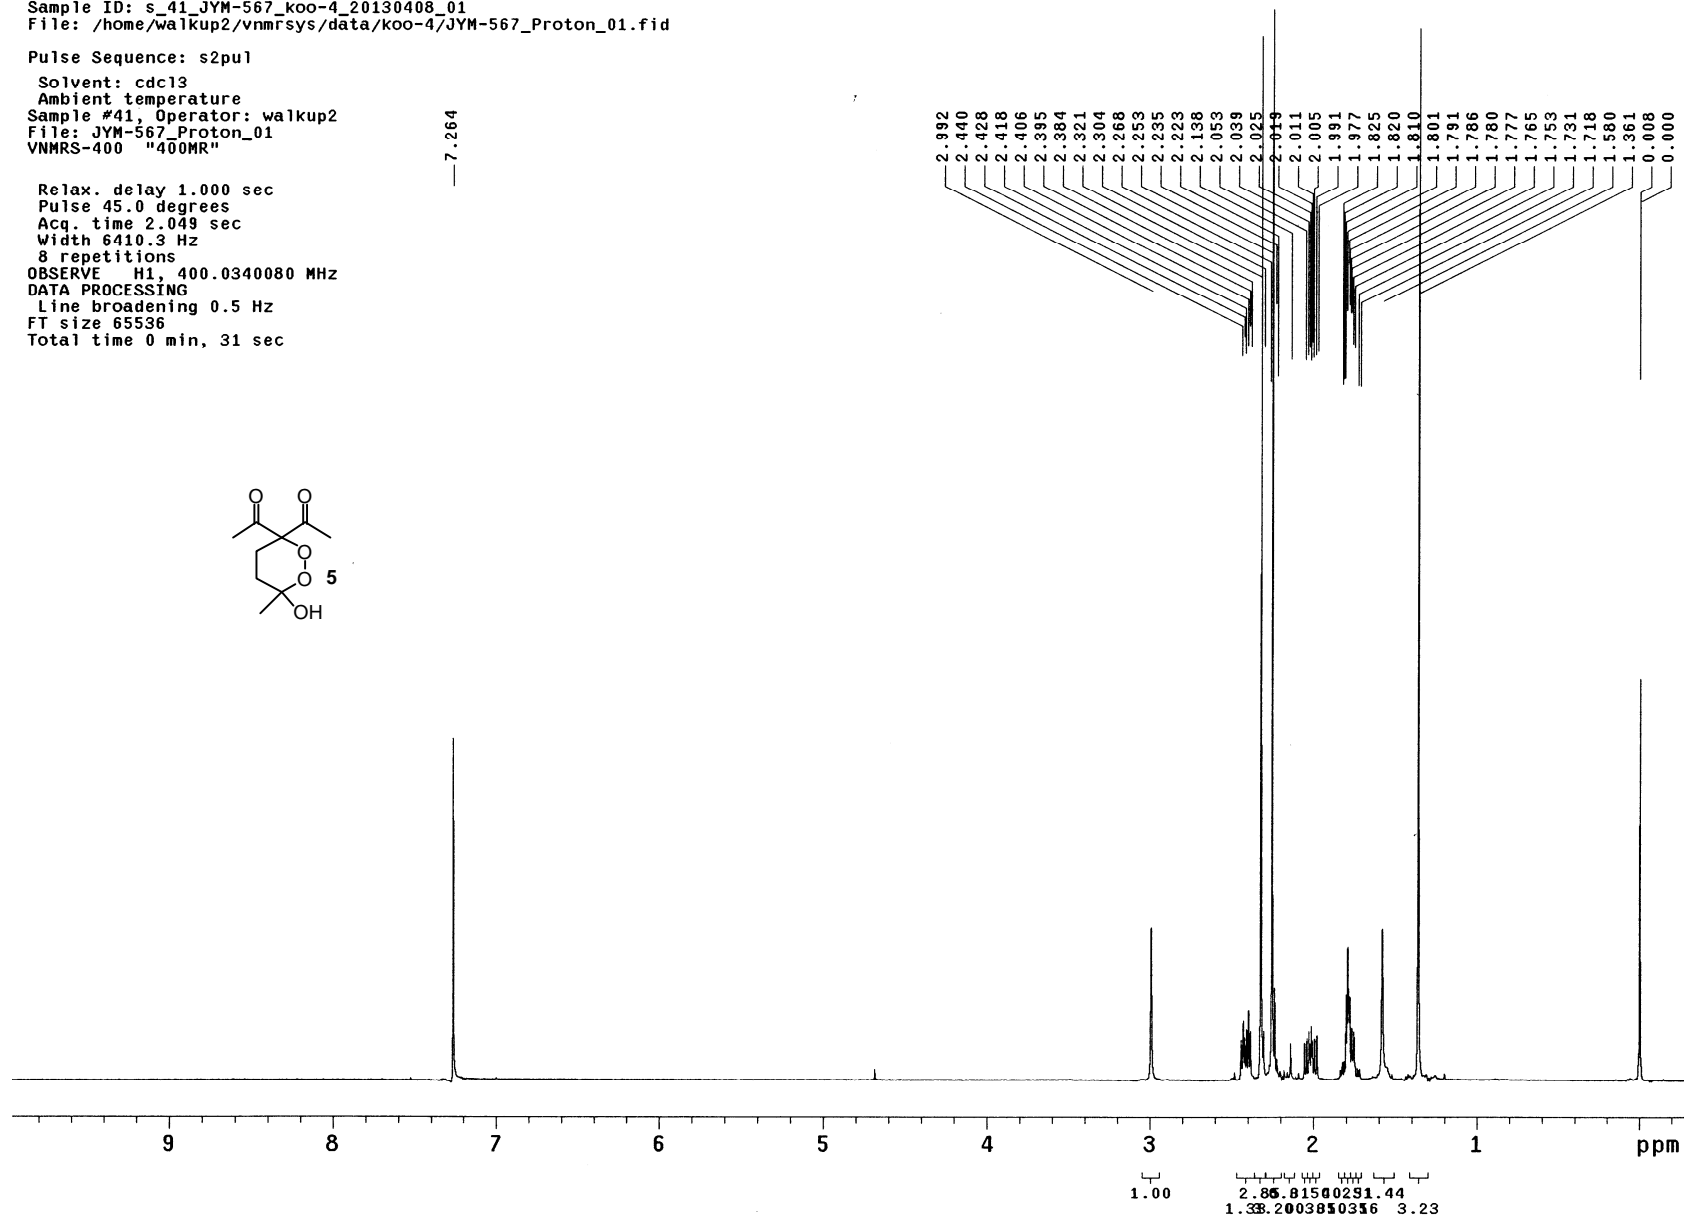



JYM-567-C

Sample: JYM-567-C  
Sample ID: s\_44\_JYM-567-C\_koo-4\_20130408\_01  
File: /home/walkup2/vnmrsys/data/koo-4/JYM-567-C\_Carbon\_01.fid

Pulse Sequence: s2pu1

Solvent: cdc13  
Ambient temperature  
Sample # 449 Operator: walkup2  
File: JYM-567-C\_Carbon\_01  
VNMR-400 "400MR"

Relax. delay 1.000 sec  
Pulse 45.0 degrees  
Acq. time 1.300 sec  
Width 24509.8 Hz  
128 repetitions  
OBSERVE C13, 100.5886367 MHz  
DECOUPLE H1, 400.0360169 MHz  
Power 42 dB  
continuously on  
WALTZ-16 modulated  
DATA PROCESSING  
Line broadening 0.5 Hz  
FT size 65536  
Total time 4 min, 56 sec

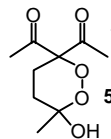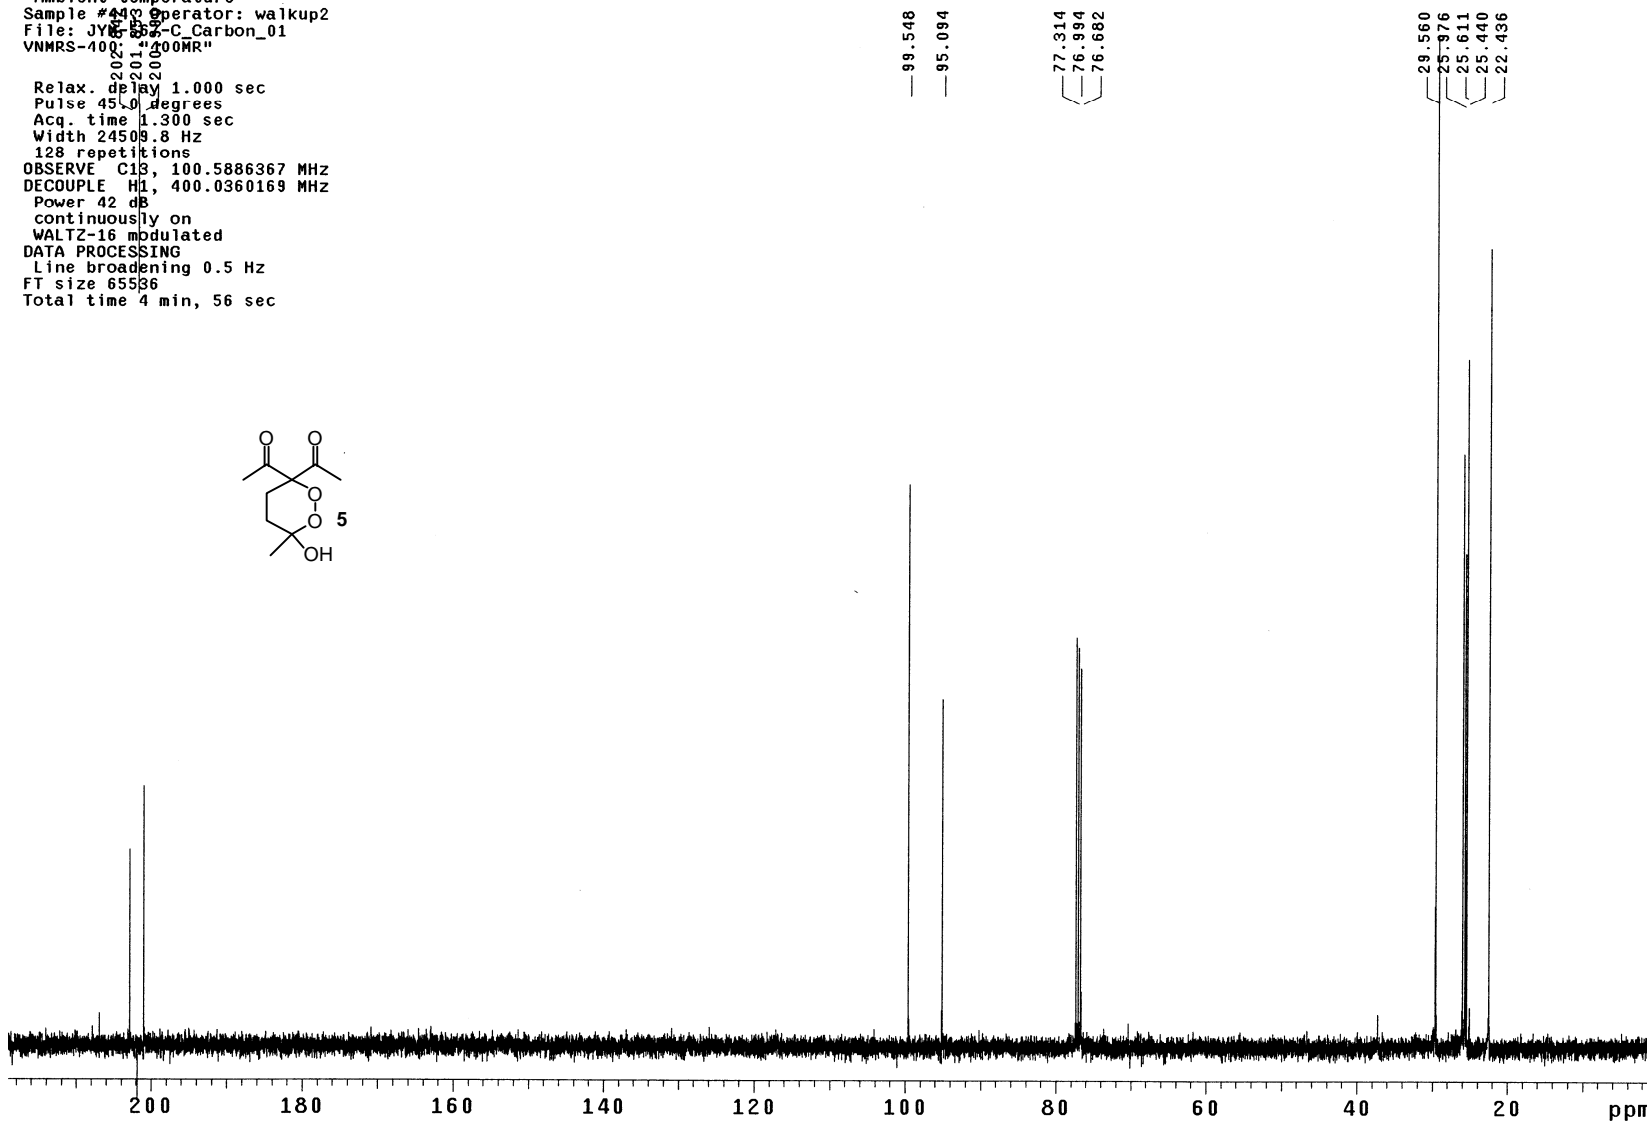

JYM-573

Sample: JYM-573  
Sample ID: s\_35\_JYM-573\_koo-4\_20130409\_01  
File: /home/walkup2/vnmrSYS/data/koo-4/JYM-573\_Proton\_01.fid

Pulse Sequence: s2pu1  
Solvent: cdc13  
Ambient temperature  
Sample #35, Operator: walkup2  
File: JYM-573\_Proton\_01  
VNMR-400 "400MR"

Relax. delay 1.000 sec  
Pulse 45.0 degrees  
Acq. time 2.049 sec  
Width 6410.3 Hz  
8 repetitions  
OBSERVE H1, 400.0340044 MHz  
DATA PROCESSING  
Line broadening 0.5 Hz  
FT size 65536  
Total time 0 min, 31 sec

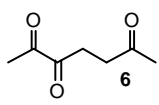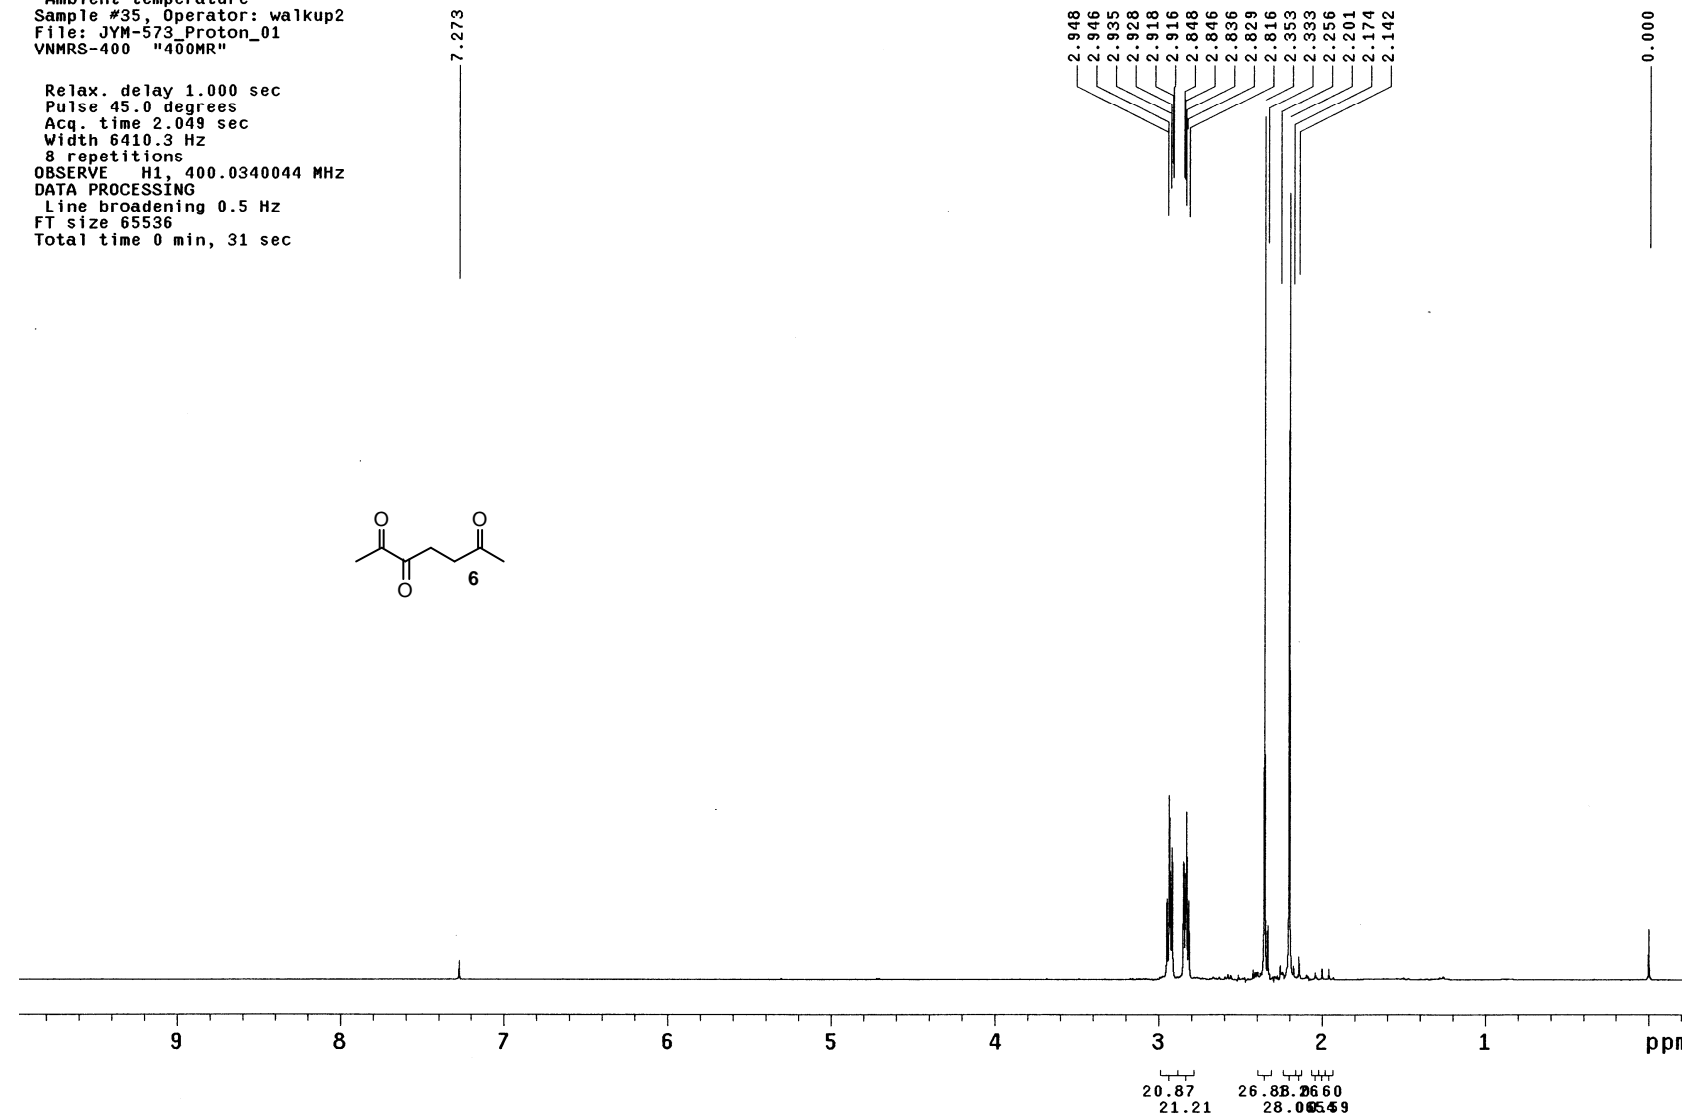

JYM-573-C

Sample: JYM-573-C  
Sample ID: s\_41\_JYM-573-C\_koo-4\_20130730\_01  
File: /home/walkup2/vnmrsys/data/koo-4/JYM-573-C\_Carbon\_01.fid

Pulse Sequence: s2pu1

Solvent: cdc13  
Ambient temperature  
Sample #41 Operator: walkup2  
File: JYM-573-C\_Carbon\_01  
VNMR-400 400MHz

Relax. delay 1.000 sec  
Pulse 45.0 degrees  
Acq. time 1.300 sec  
Width 24509.8 Hz  
512 repetitions  
OBSERVE C13, 100.5886344 MHz  
DECOUPLE H1, 400.0360169 MHz  
Power 42 dB  
continuously on  
WALTZ-16 modulated  
DATA PROCESSING  
Line broadening 0.5 Hz  
FT size 65536  
Total time 19 min, 42 sec

77.289  
76.980  
76.660

37.450

29.545

23.641

1.515  
1.530

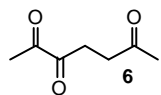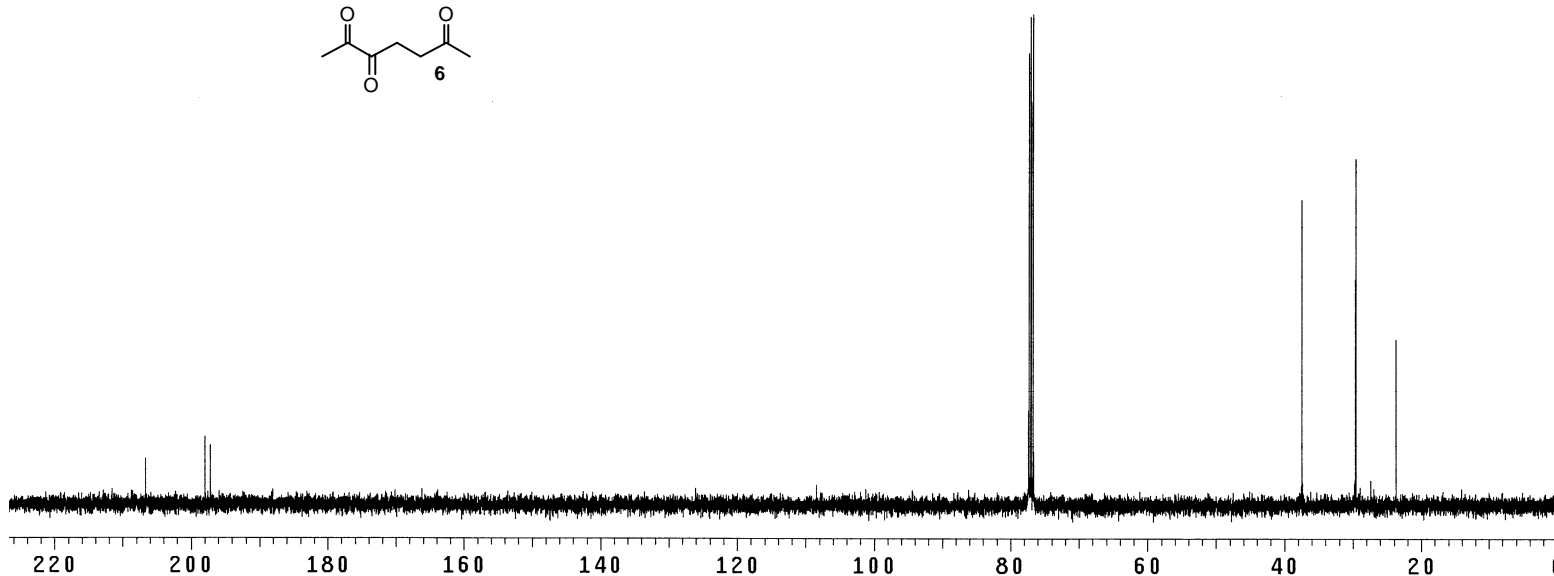

JYM-604

Sample: JYM-604  
Sample ID: s\_40\_JYM-604\_koo-4\_20130422\_01  
File: /home/walkup2/vnmr/sys/data/koo-4/JYM-604\_Proton\_01.fid

Pulse Sequence: s2pu1  
Solvent: cdcl3  
Ambient temperature  
Sample #40, Operator: walkup2  
File: JYM-604\_Proton\_01  
VNMR-400 "400MR"

Relax. delay 1.000 sec  
Pulse 45.0 degrees  
Acq. time 2.049 sec  
Width 6410.3 Hz  
8 repetitions  
OBSERVE H1, 400.0340068 MHz  
DATA PROCESSING  
Line broadening 0.5 Hz  
FT size 65536  
Total time 0 min, 31 sec

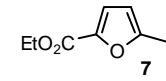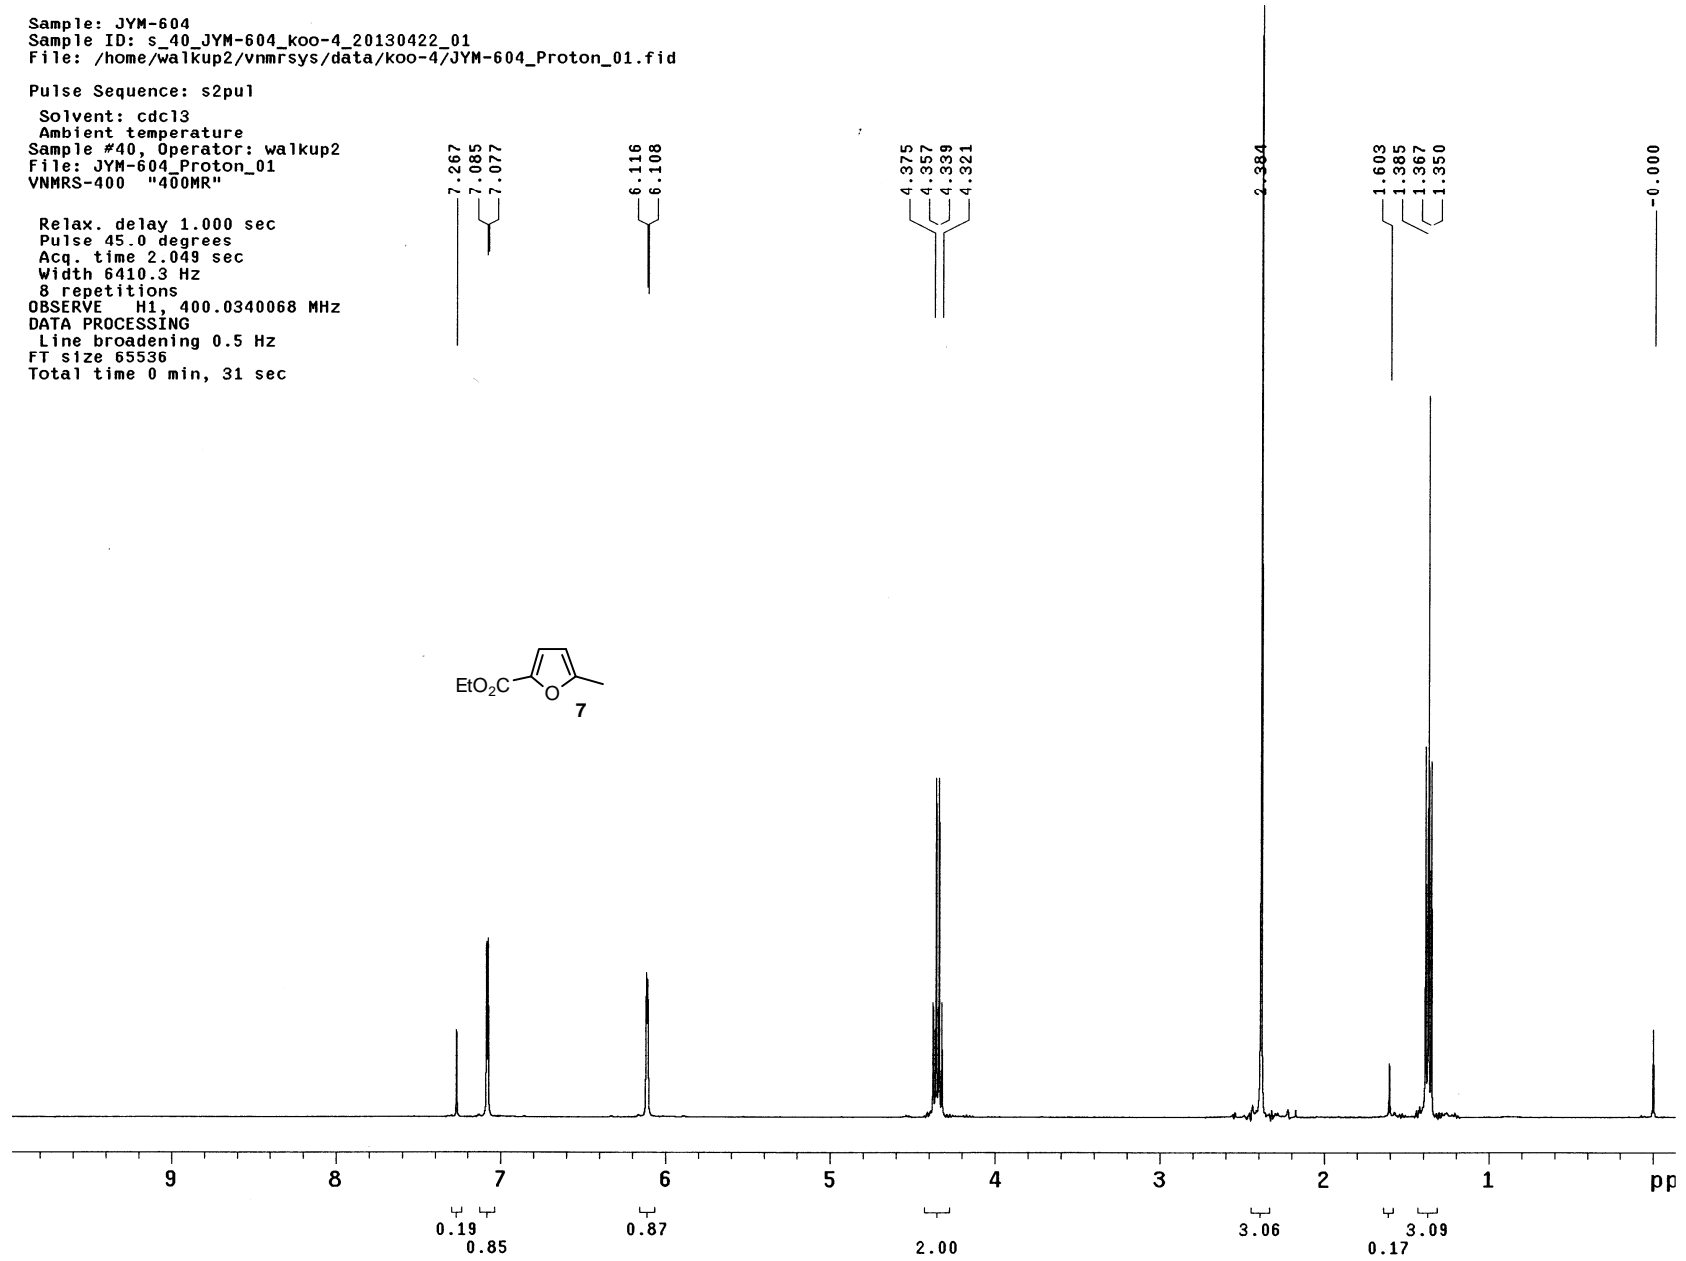

JYM-604-C

Sample: JYM-604-C  
Sample ID: s\_45\_JYM-604-C\_koo-4\_20130423\_01  
File: /home/walkup2/vnmrsys/data/koo-4/JYM-604-C\_Carbon\_01.fid

Pulse Sequence: s2pu1

Solvent: cdc13  
Ambient temperature  
Sample #45, Operator: walkup2  
File: JYM-604-C\_Carbon\_01  
VNMR5-400 "400MR"

Relax. delay 1.000 sec  
Pulse 45.0 degrees  
Acq. time 1.300 sec  
Width 24509.8 Hz  
128 repetitions  
OBSERVE C13, 100.5886383 MHz  
DECOUPLE H1, 400.0360169 MHz  
Power 42 dB  
continuously on  
WALTZ-16 modulated  
DATA PROCESSING  
Line broadening 0.5 Hz  
FT size 65536  
Total time 4 min, 56 sec

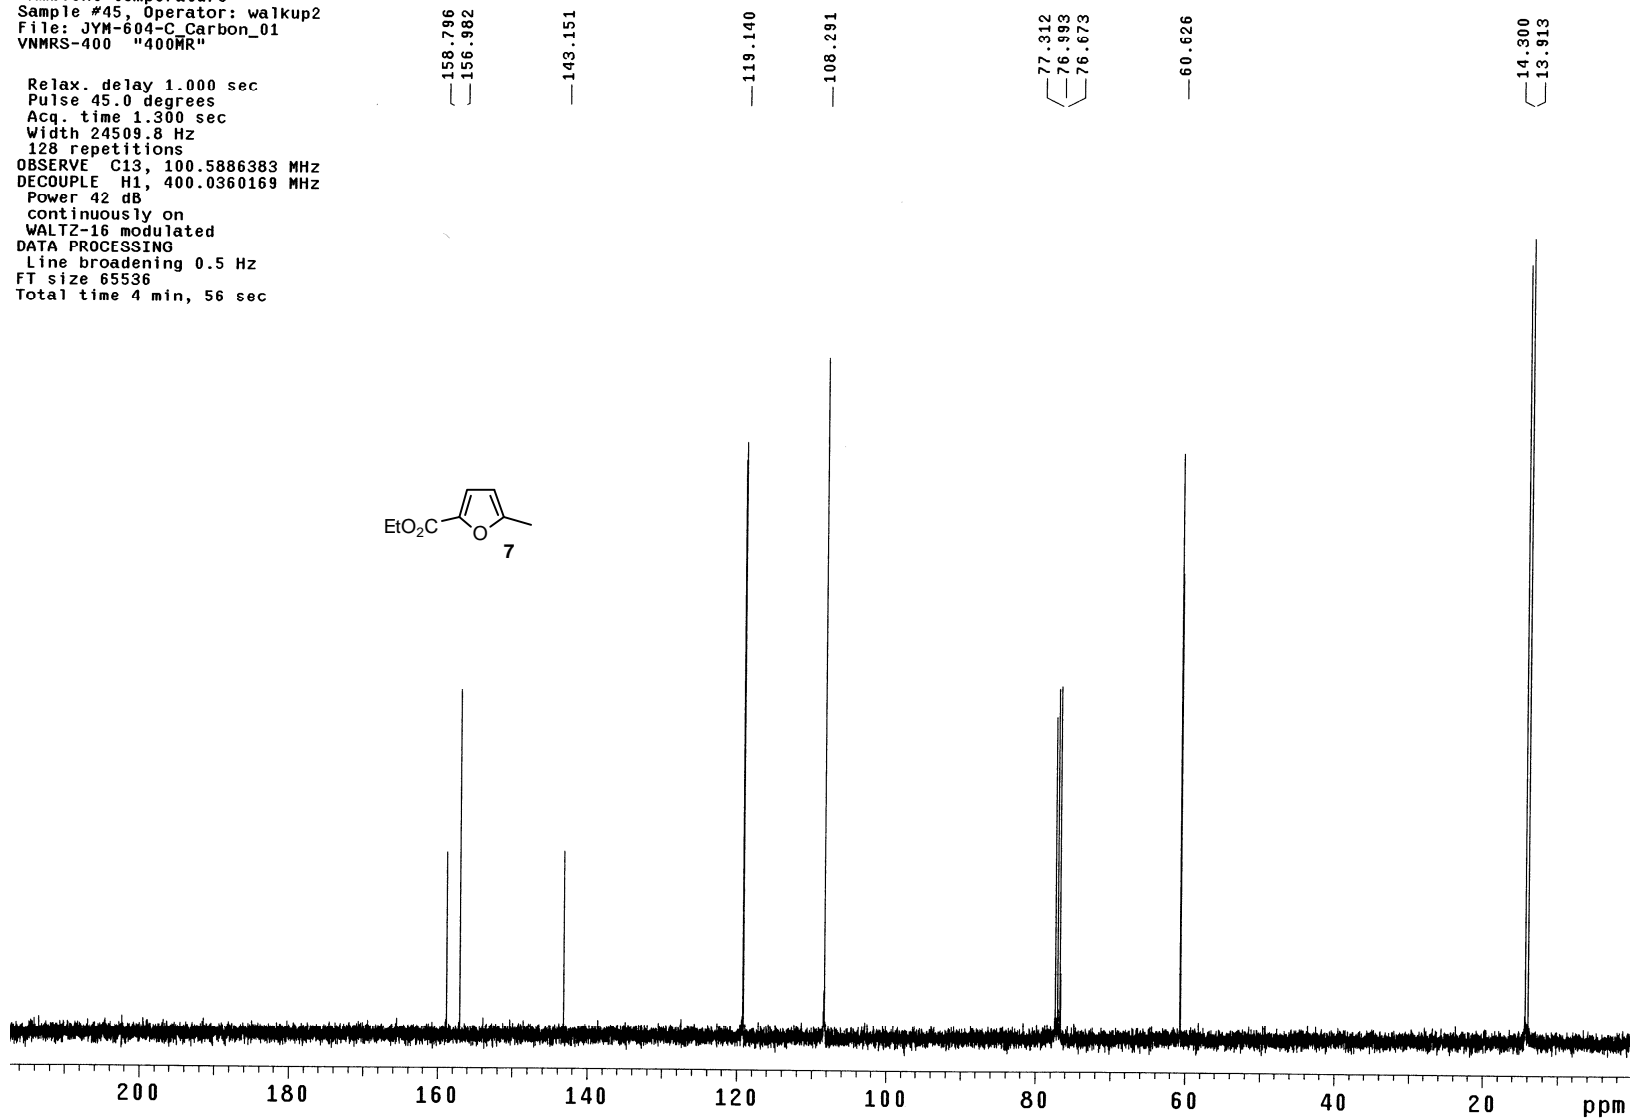

Sample: MD-313-4  
Sample ID: s\_49\_MD-313-4\_koo-4\_20140703\_01  
File: /home/walkup2/vnmrsys/data/koo-4/MD-313-4\_Proton\_01.fid

Pulse Sequence: s2pu1  
Solvent: cdcl3  
Ambient temperature  
Sample #49, Operator: walkup2  
File: MD-313-4\_Proton\_01  
VNMRs-400 "400MR"

Relax. delay 1.000 sec  
Pulse 45.0 degrees  
Acq. time 2.049 sec  
Width 6830.6 Hz  
8 repetitions  
OBSERVE H1, 400.0340091 MHz  
DATA PROCESSING  
Line broadening 0.5 Hz  
FT size 65536  
Total time 0 min, 31 sec

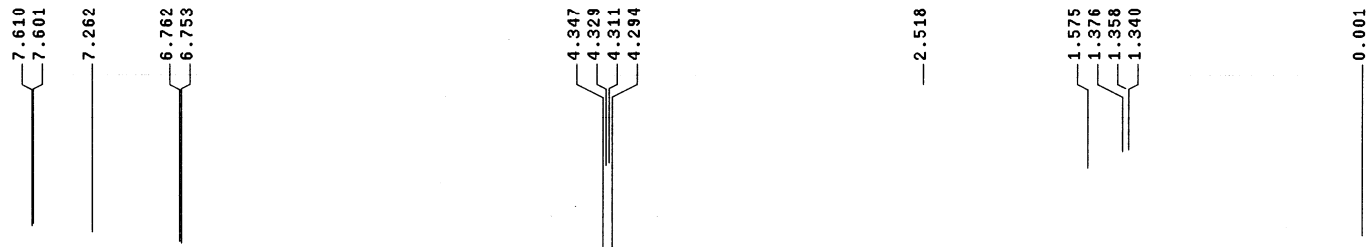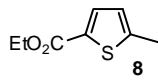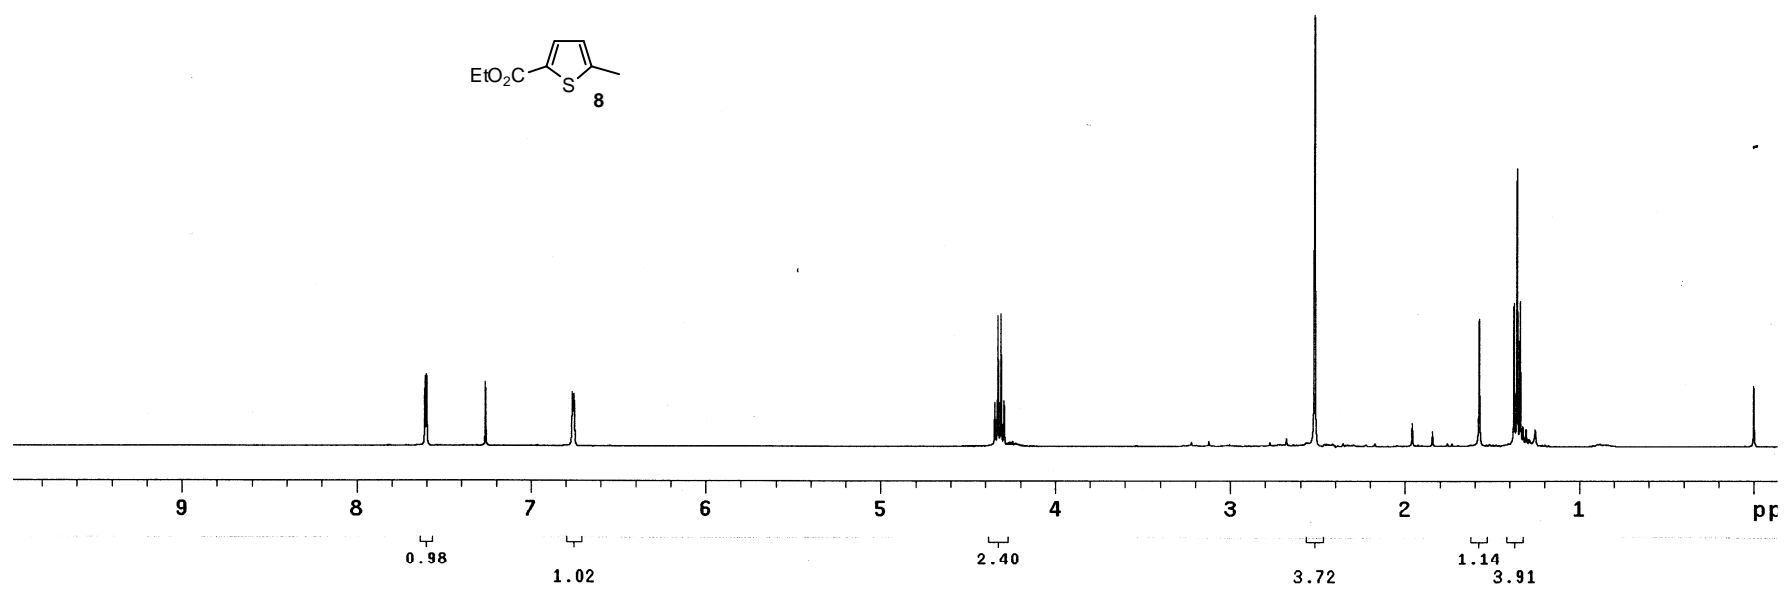

Sample: MD-313-4-C  
Sample ID: s\_40\_MD-313-4-C\_koo-4\_20140703\_01  
File: /home/walkup2/vnmrSYS/data/koo-4/MD-313-4-C\_Carbon\_01.fid

Pulse Sequence: s2pu1  
Solvent: cdcl3  
Ambient temperature  
Sample #40, Operator: walkup2  
File: MD-313-4-C\_Carbon\_01  
VNMR5-400 "400MR"

Relax. delay 1.000 sec  
Pulse 45.0 degrees  
Acq. time 1.300 sec  
Width 24509.8 Hz  
256 repetitions  
OBSERVE C13, 100.5886325 MHz  
DECOUPLE H1, 400.0360169 MHz  
Power 42 dB  
continuously on  
WALTZ-16 modulated  
DATA PROCESSING  
Line broadening 0.5 Hz  
FT size 65536  
Total time 9 min, 51 sec

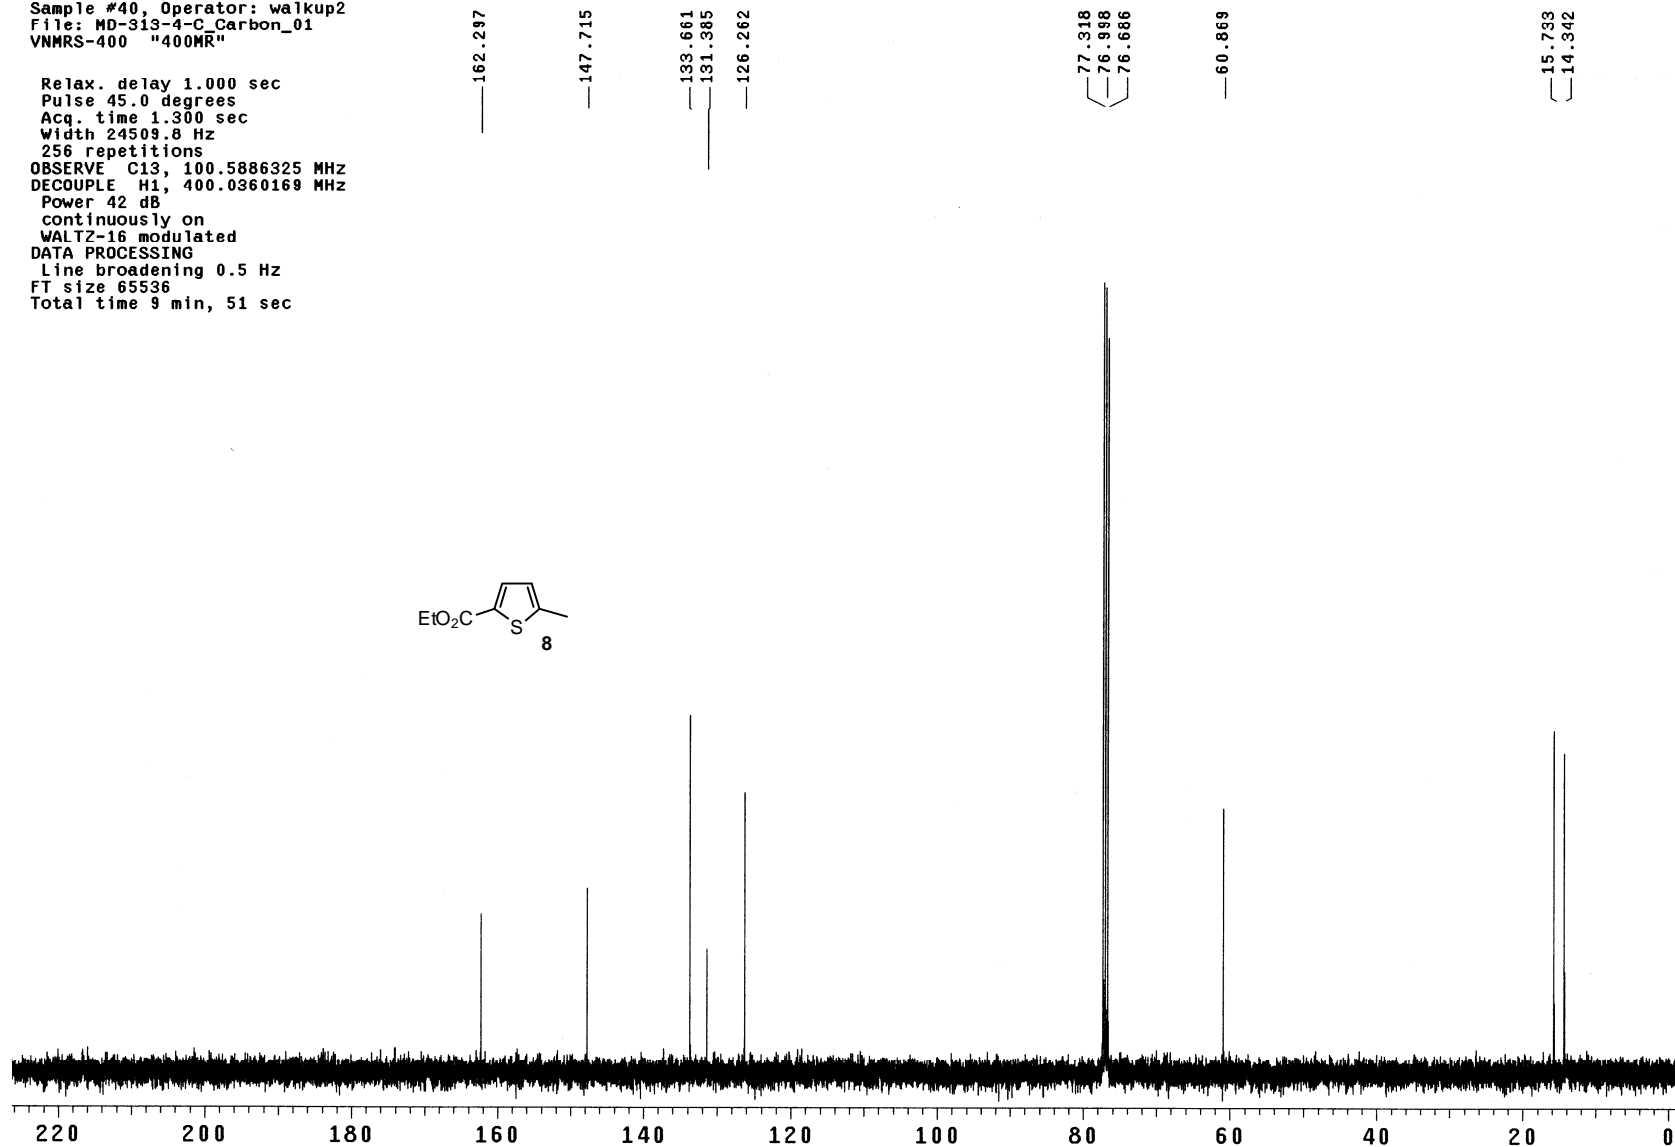

JYM-461

Sample: JYM-461

Sample ID: s\_37\_JYM-461\_koo-4\_20130124\_01

File: /home/walkup2/vnmr/sys/data/koo-4/JYM-461\_Proton\_01.fid

Pulse Sequence: s2pu1

Solvent: cdc13  
Ambient temperature  
Sample #37, Operator: walkup2  
File: JYM-461\_Proton\_01  
VNMR-400 "400MR"

Relax. delay 1.000 sec  
Pulse 45.0 degrees  
Acq. time 2.049 sec  
Width 6410.3 Hz  
8 repetitions  
OBSERVE H1, 400.0340093 MHz  
DATA PROCESSING  
Line broadening 0.5 Hz  
FT size 65536  
Total time 0 min, 31 sec

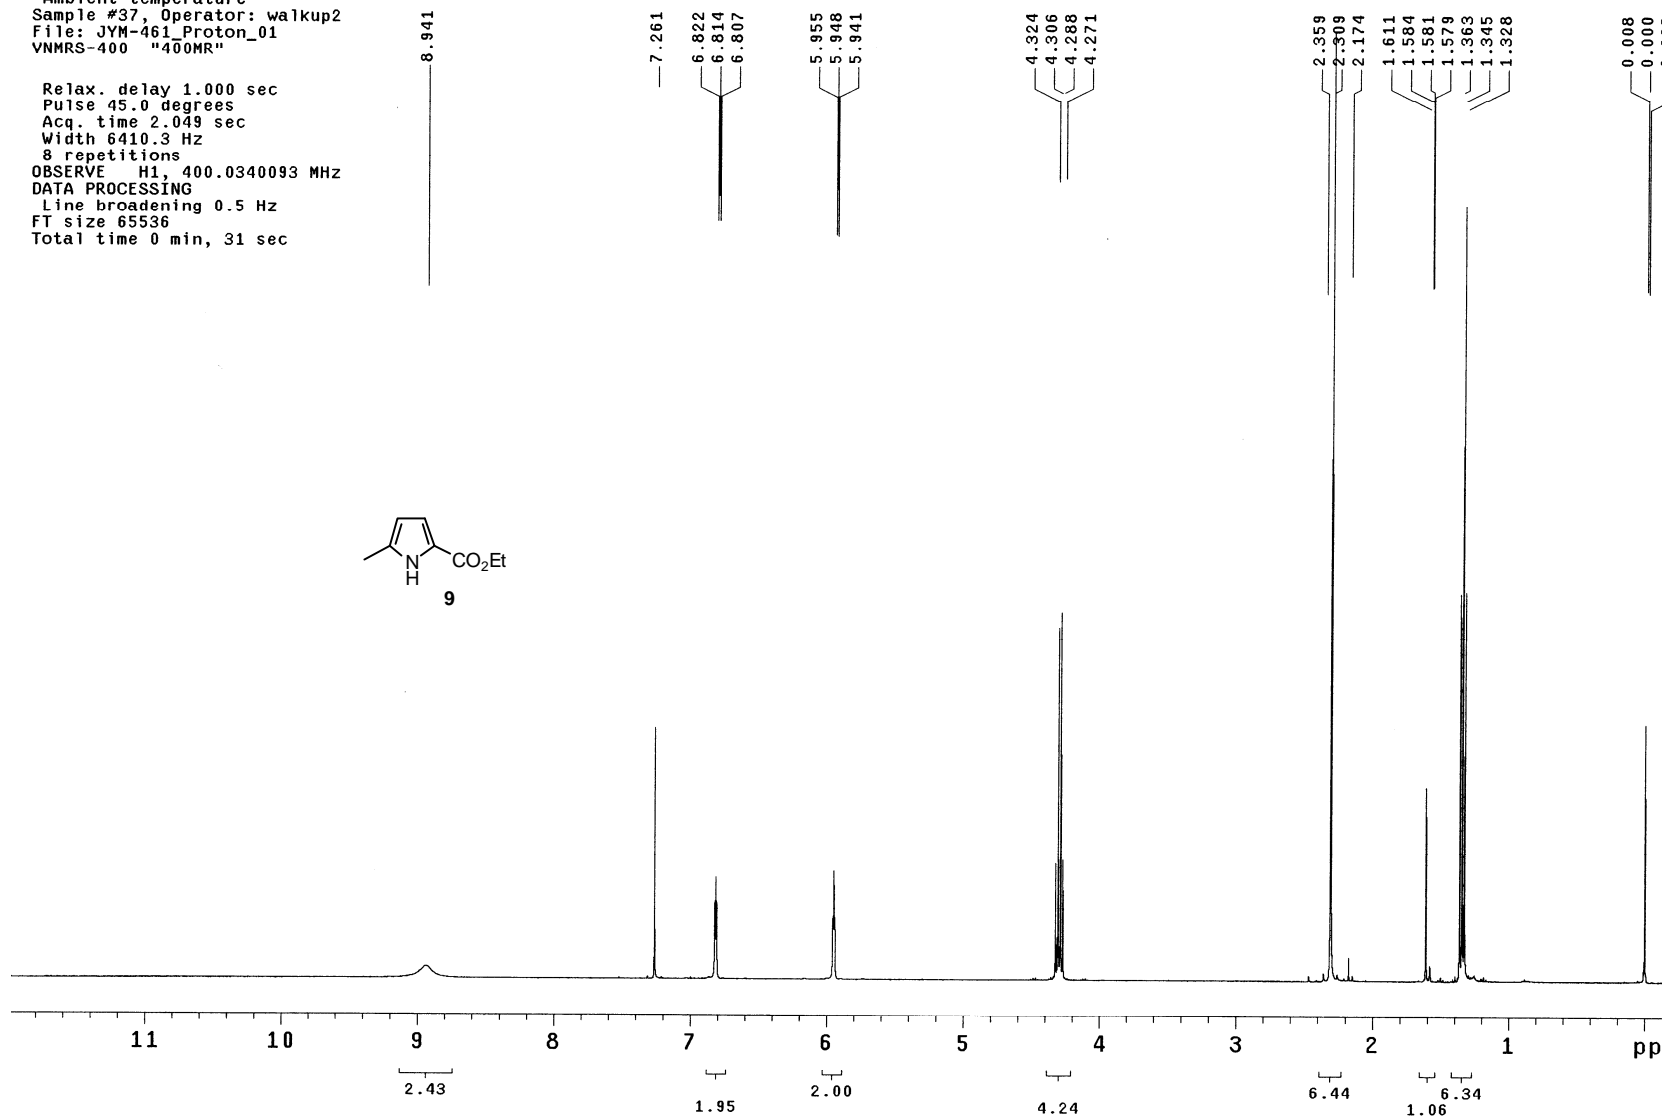



JYM-469

Sample: JYM-469  
Sample ID: s\_41\_JYM-469\_koo-4\_20130129\_01  
File: /home/walkup2/vnmr/proc/data/koo-4/JYM-469\_Proton\_01.fid

Pulse Sequence: s2pu1

Solvent: cdc13  
Ambient temperature  
Sample #41, Operator: walkup2  
File: JYM-469\_Proton\_01  
VNMRS-400 "400MR"

Relax. delay 1.000 sec  
Pulse 45.0 degrees  
Acq. time 2.049 sec  
Width 6410.3 Hz  
8 repetitions  
OBSERVE H1, 400.0340103 MHz  
DATA PROCESSING  
Line broadening 0.5 Hz  
FT size 65536  
Total time 0 min, 31 sec

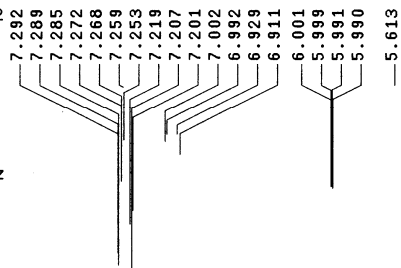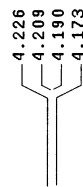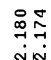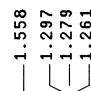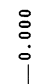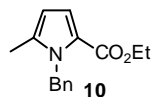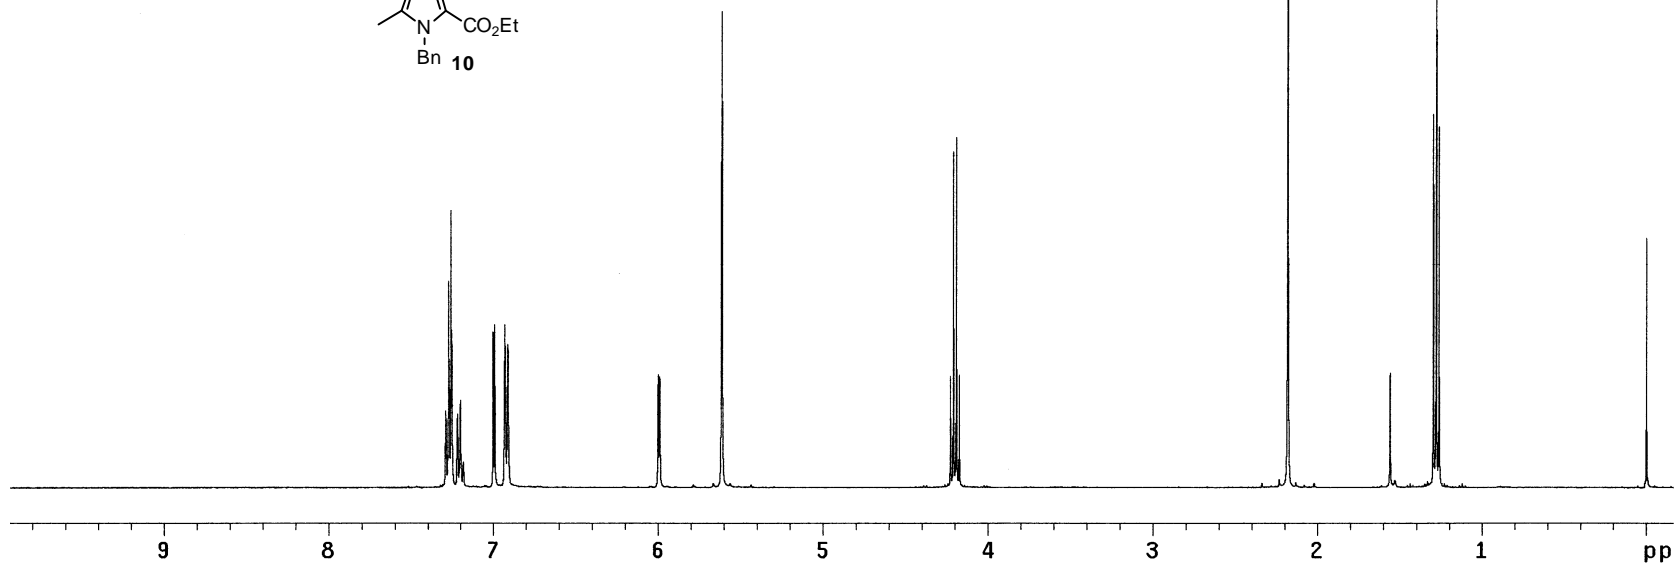

0.736  
21.09  
34.13  
9.94

2.00

4.93

4.48

7.09

0.88

6.98

JYM-469-C

Sample: JYM-469-C  
Sample ID: s\_44\_JYM-469-C\_koo-4\_20130129\_01  
File: /home/walkup2/vnmrsvs/data/koo-4/JYM-469-C\_Carbon\_01.fid

Pulse Sequence: s2pu1

Solvent: cdc13  
Ambient temperature  
Sample #44, Operator: walkup  
File: JYM-469-C\_Carbon\_01  
VNMR-400 "400MR"

Relax. delay 1.000 sec  
Pulse 45.0 degrees  
Acq. time 1.300 sec  
Width 24509.8 Hz  
128 repetitions  
OBSERVE C13, 100.5886395 MHz  
DECOUPLE H1, 400.0360169 MHz  
Power 42 dB  
continuously on  
WALTZ-16 modulated  
DATA PROCESSING  
Line broadening 0.5 Hz  
FT size 65536  
Total time 4 min, 56 sec

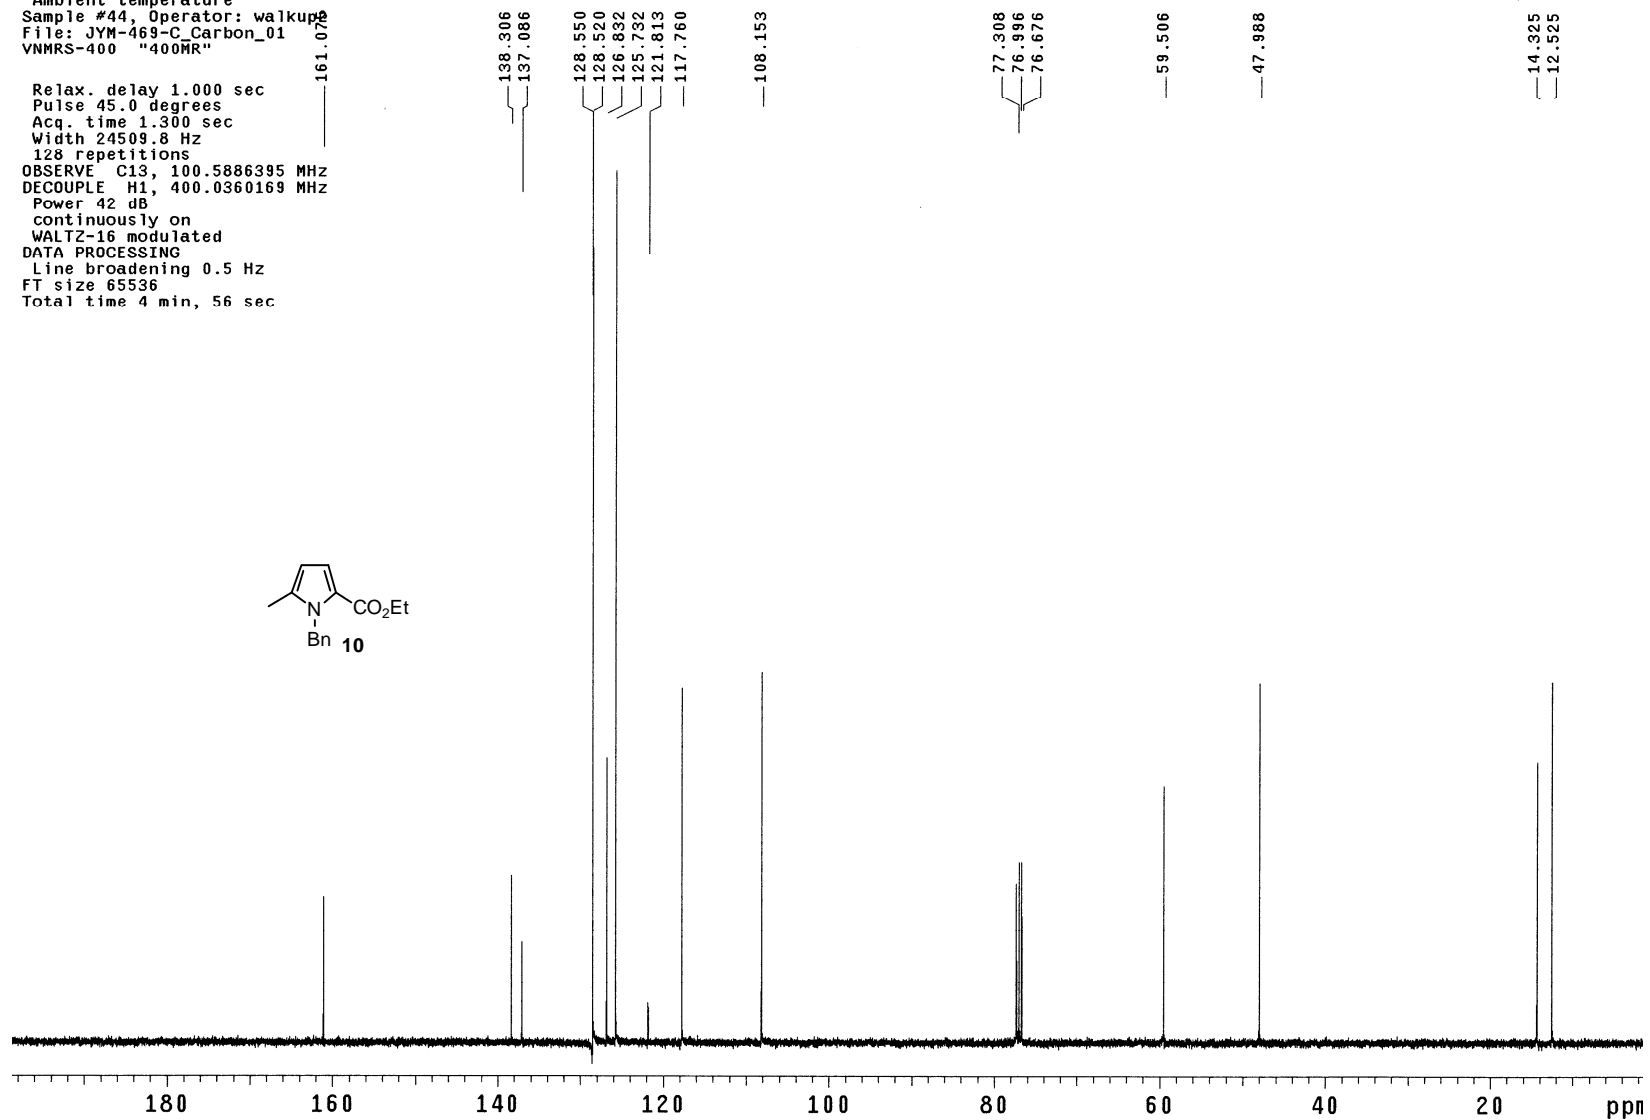

JYM-688

Sample: JYM-688  
Sample ID: s\_43\_JYM-688\_koo-4\_20130628\_01  
File: /home/walkup2/vnmr/sys/data/koo-4/JYM-688\_Proton\_01.fid

Pulse Sequence: s2pu1  
Solvent: cdc13  
Ambient temperature  
Sample #43, Operator: walkup2  
File: JYM-688\_Proton\_01  
VNMR-400 "400MR"

Relax. delay 1.000 sec  
Pulse 45.0 degrees  
Acq. time 2.049 sec  
Width 6410.3 Hz  
8 repetitions  
OBSERVE H1, 400.0340105 MHz  
DATA PROCESSING  
Line broadening 0.5 Hz  
FT size 65536  
Total time 0 min, 31 sec

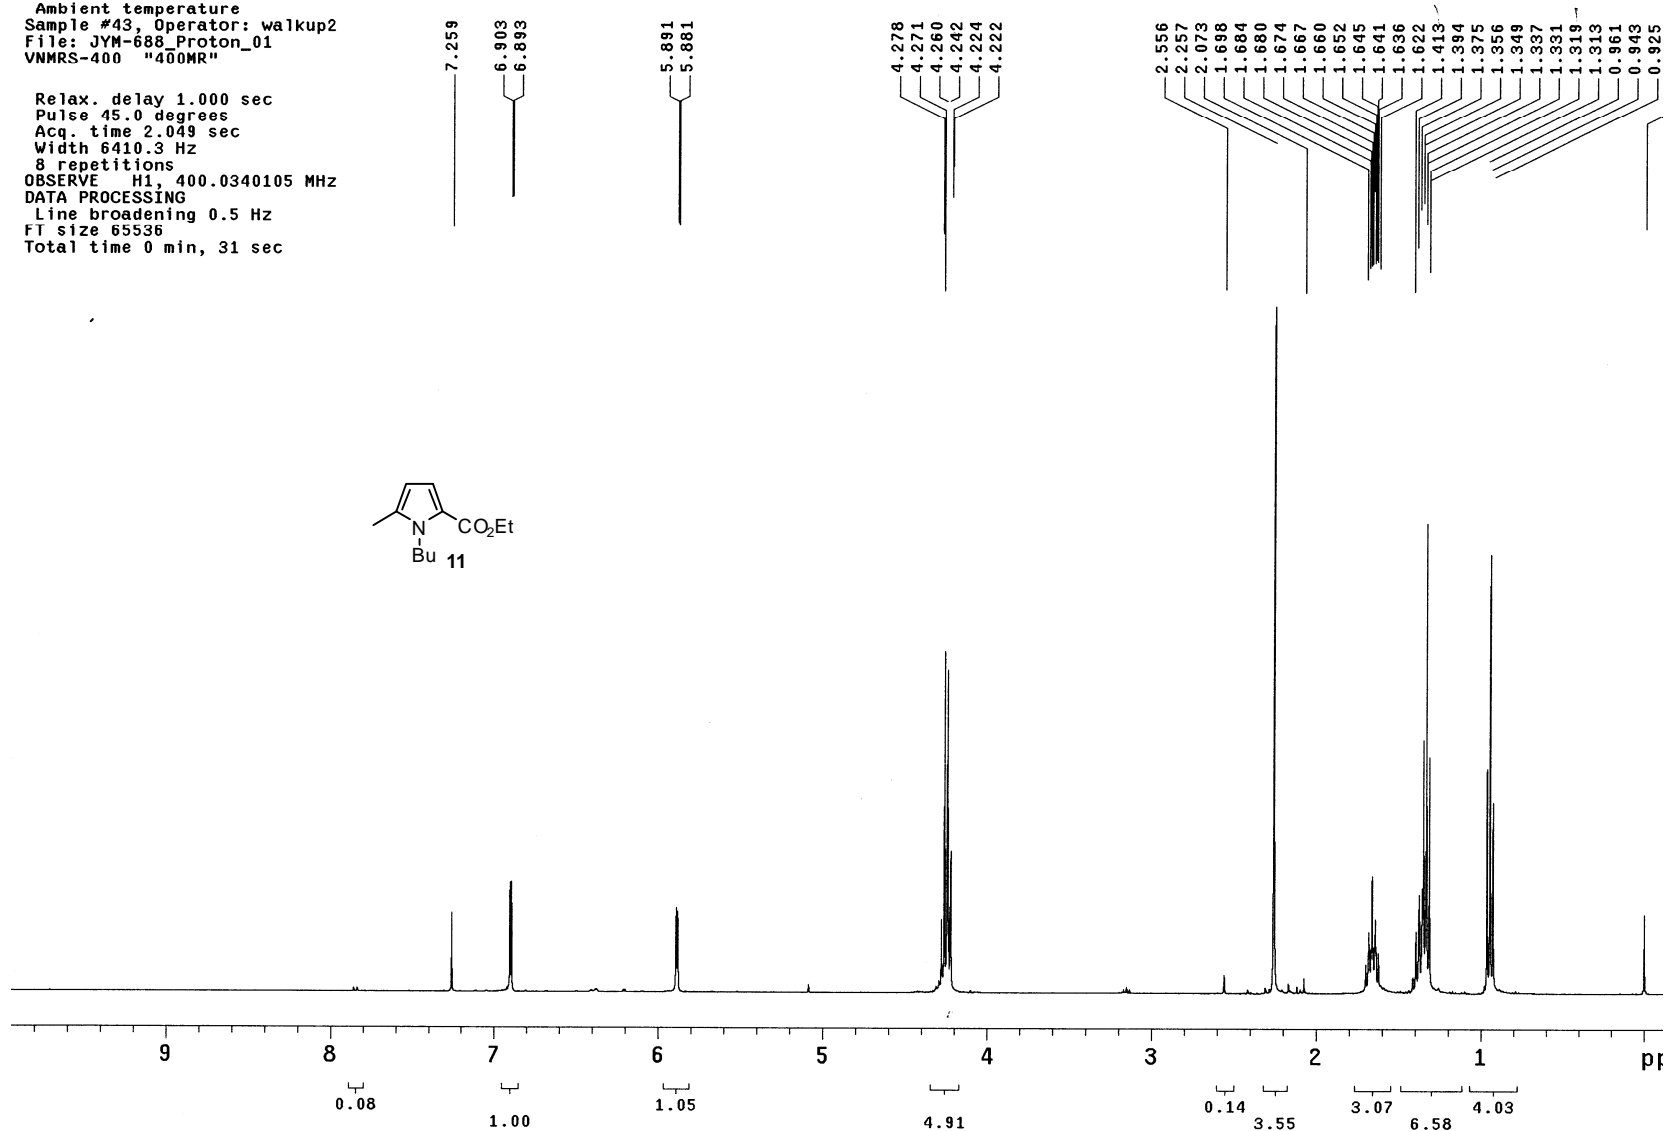

JYM-688-C

Sample: JYM-688-C

Sample ID: s\_45\_JYM-688-C\_koo-4\_20130628\_01

File: /home/walkup2/vnmrSYS/data/koo-4/JYM-688-C\_Carbon\_01.fid

Pulse Sequence: s2pu1

Solvent: cdc13  
Ambient temperature  
Sample #45, Operator: walkup  
File: JYM-688-C\_Carbon\_01  
VNMR-400 "400MR"

Relax. delay 1.000 sec  
Pulse 45.0 degrees  
Acq. time 1.300 sec  
Width 24509.8 Hz  
218 repetitions  
OBSERVE C13, 100.5886350 MHz  
DECOUPLE H1, 400.0360169 MHz  
Power 42 dB  
continuously on  
WALTZ-16 modulated  
DATA PROCESSING  
Line broadening 0.5 Hz  
FT size 65536  
Total time 8 min, 23 sec

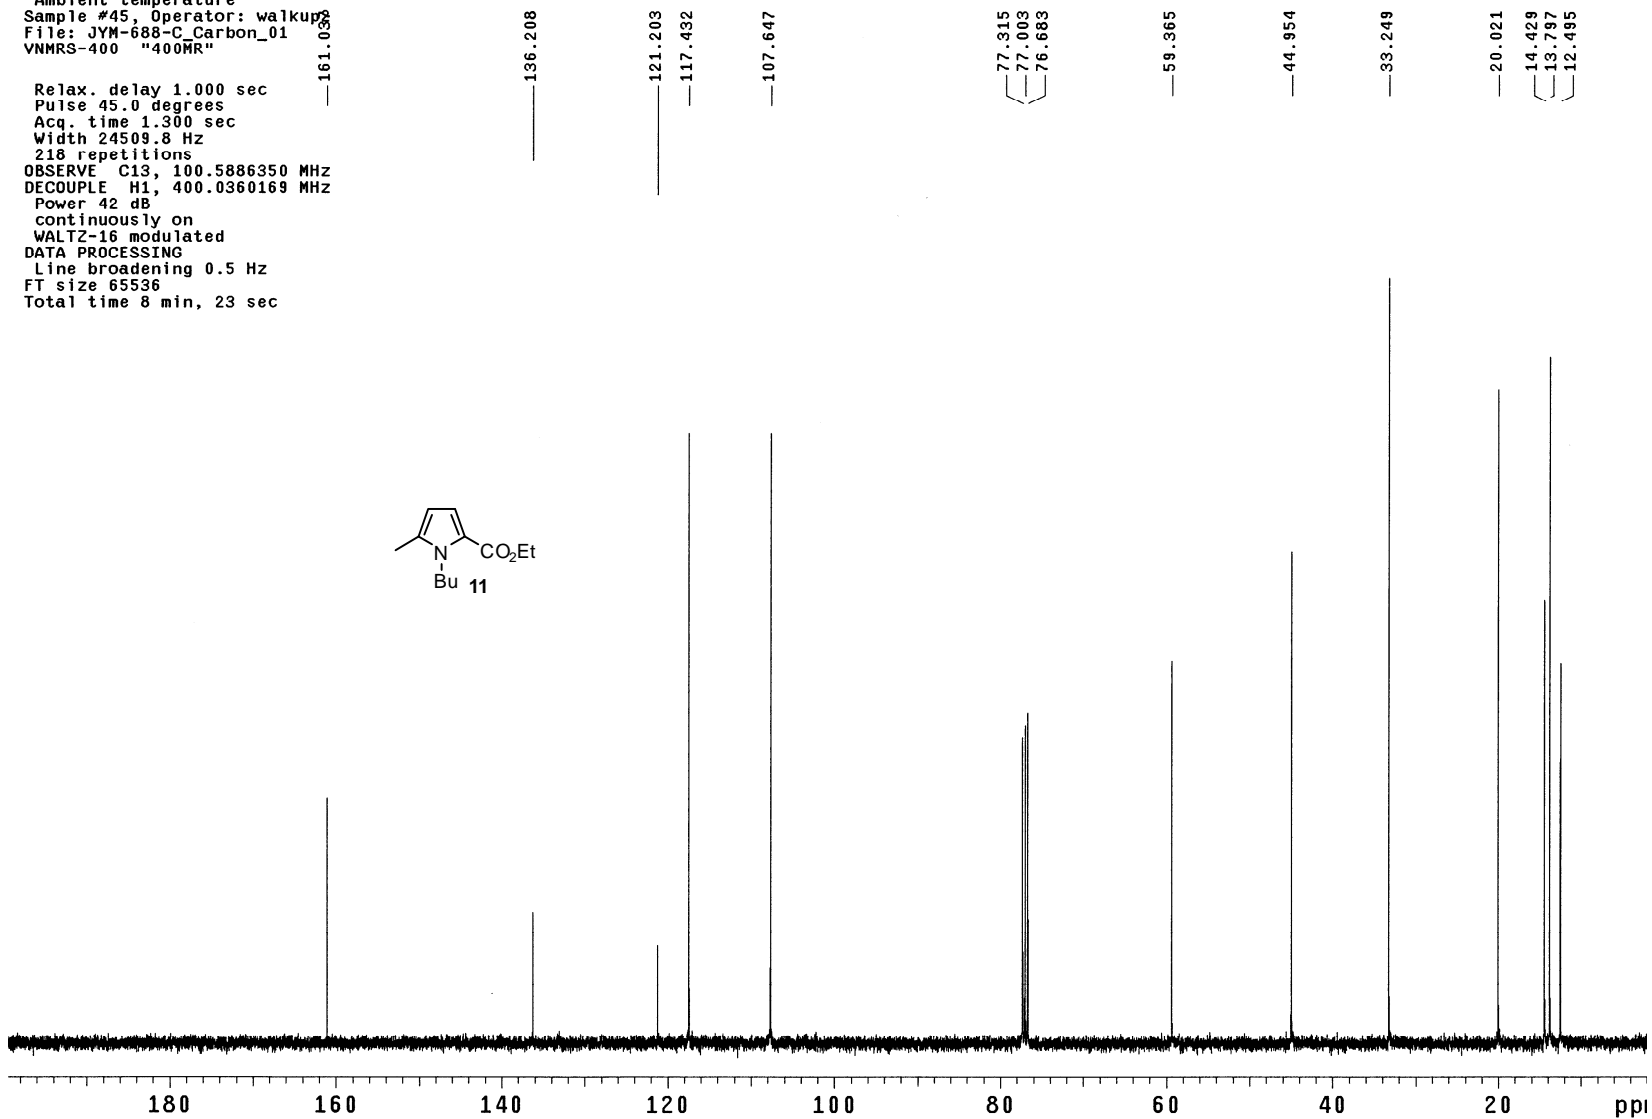

Sample: MD-J-12  
Sample ID: s\_46\_MD-J-12\_koo-4\_20140530\_01  
File: /home/walkup2/vnmr/sys/data/koo-4/MD-J-12\_Proton\_03.fid

Pulse Sequence: s2pu1  
Solvent: cdc13  
Ambient temperature  
Sample #46, Operator: walkup2  
File: MD-J-12\_Proton\_03  
VNMR-400 "400MR"

Relax. delay 1.000 sec  
Pulse 45.0 degrees  
Acq. time 2.049 sec  
Width 6830.6 Hz  
8 repetitions  
OBSERVE H1, 400.0340091 MHz  
DATA PROCESSING  
Line broadening 0.5 Hz  
FT size 65536  
Total time 0 min, 31 sec

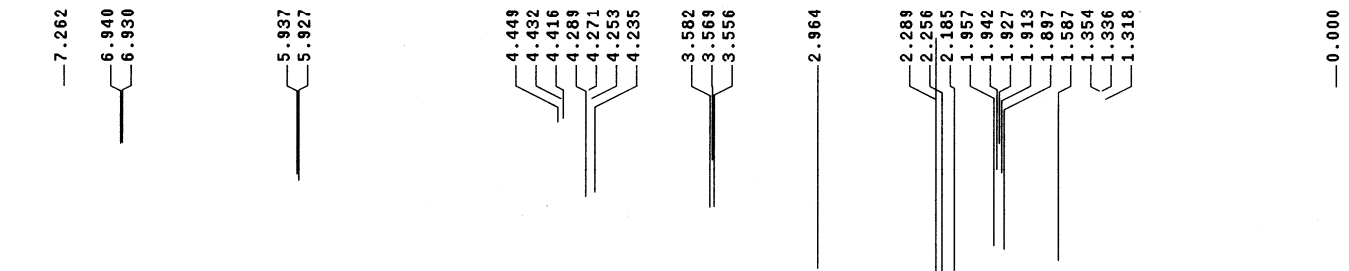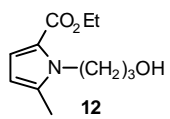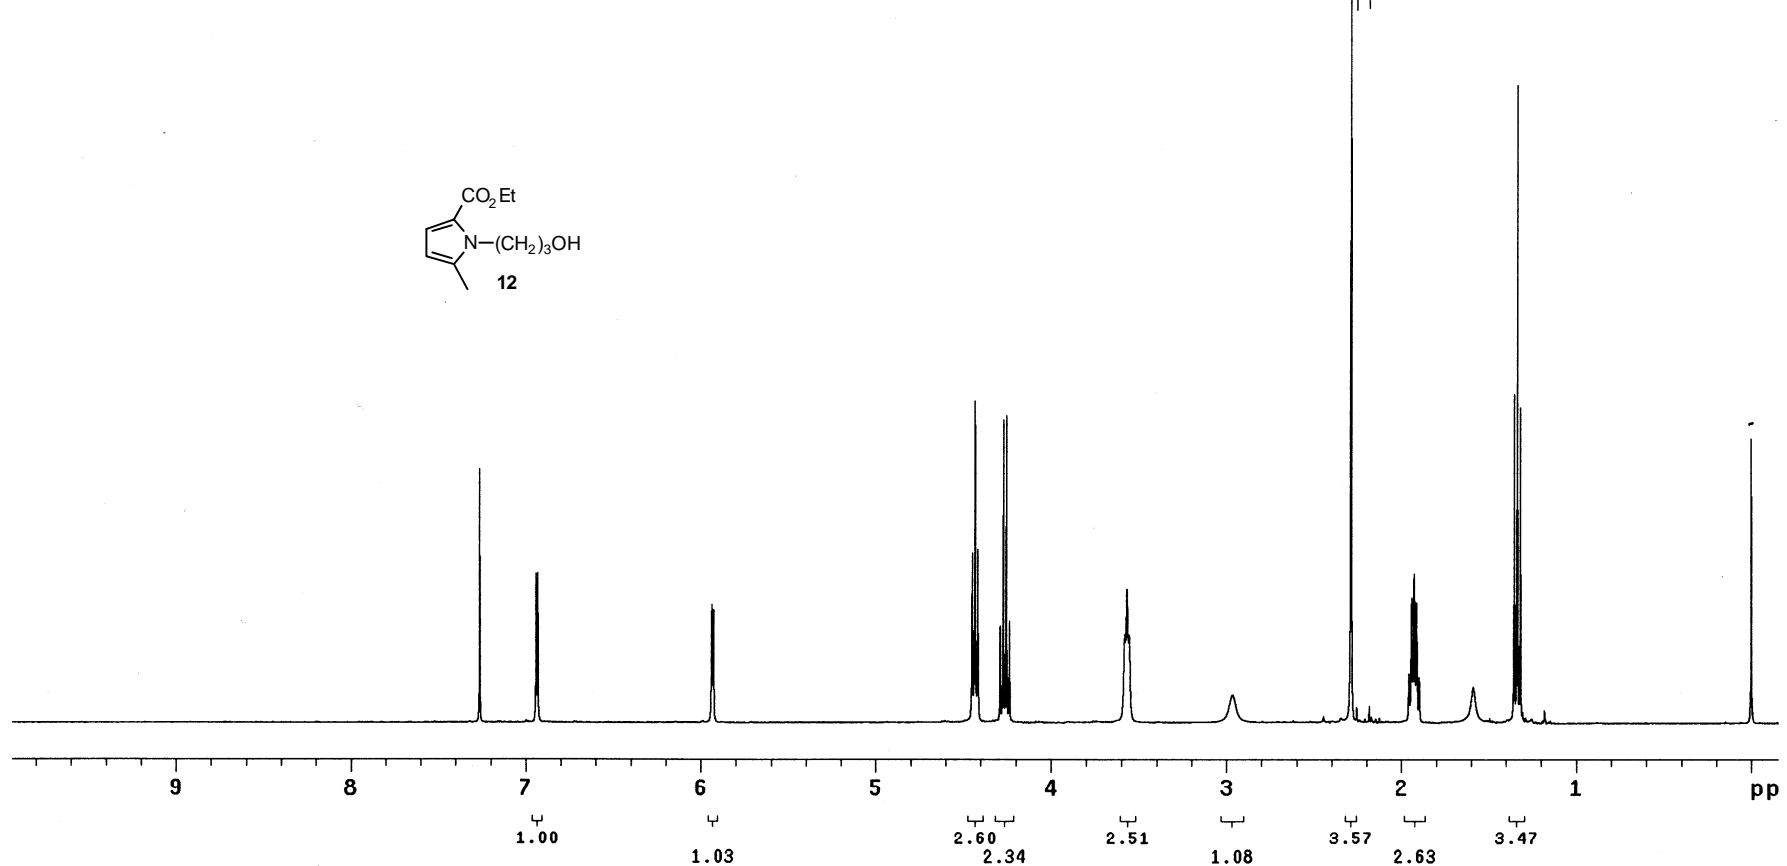

Sample: MD-J-12  
Sample ID: s\_46\_MD-J-12\_koo-4\_20140603\_01  
File: /home/walkup2/vnmrsvs/data/koo-4/MD-J-12\_Carbon\_01.fid

Pulse Sequence: s2pu1

Solvent: cdc13  
Ambient temperature  
Sample #46, Operator: walkup2  
File: MD-J-12\_Carbon\_01  
VNMR-400 "400MR"

Relax. delay 1.000 sec  
Pulse 45.0 degrees  
Acq. time 1.300 sec  
Width 24509.8 Hz  
512 repetitions  
OBSERVE C13, 100.5886342 MHz  
DECOUPLE H1, 400.0360169 MHz  
Power 42 dB  
continuously on  
WALTZ-16 modulated  
DATA PROCESSING  
Line broadening 0.5 Hz  
FT size 65536  
Total time 19 min, 42 sec

162.005  
136.998  
121.464  
118.051  
108.272  
77.323  
77.004  
76.684  
59.856  
58.711  
41.207  
33.763  
14.377  
12.496

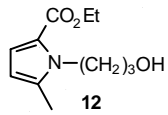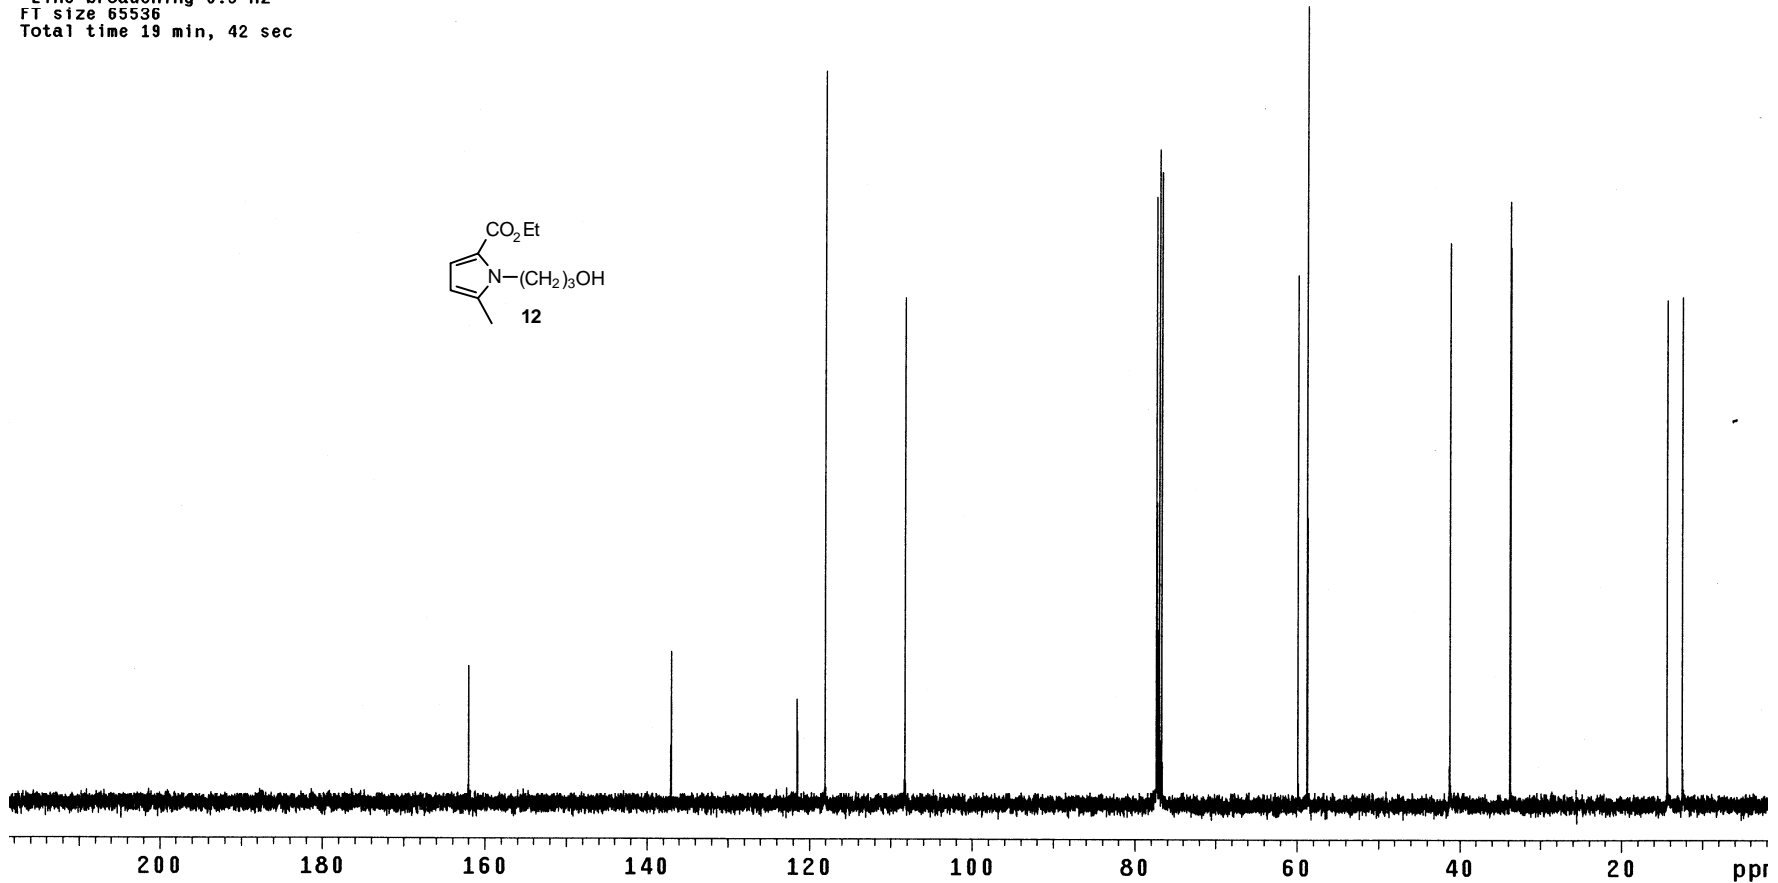

JYM-699

Sample: JYM-699  
Sample ID: s\_45\_JYM-699\_koo-4\_20130702\_01  
File: /home/walkup2/vnmrsys/data/koo-4/JYM-699\_Proton\_01.fid

Pulse Sequence: s2pu1  
Solvent: cdc13  
Ambient temperature  
Sample #45, Operator: walkup2  
File: JYM-699\_Proton\_01  
VNMR-400 "400MR"

Relax. delay 1.000 sec  
Pulse 45.0 degrees  
Acq. time 2.049 sec  
Width 6410.3 Hz  
8 repetitions  
OBSERVE H1, 400.0340103 MHz  
DATA PROCESSING  
Line broadening 0.5 Hz  
FT size 65536  
Total time 0 min, 31 sec

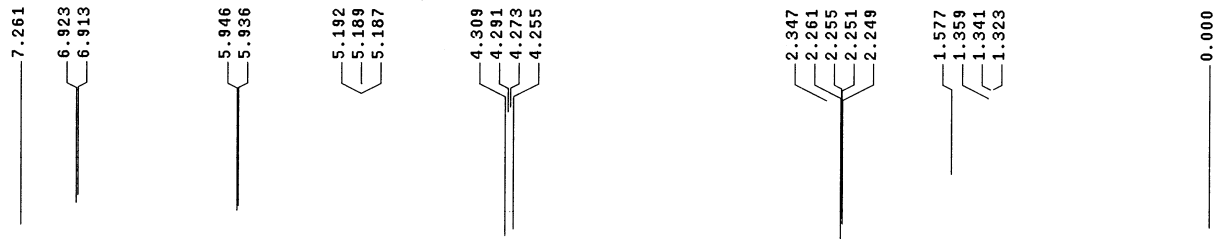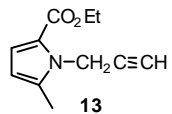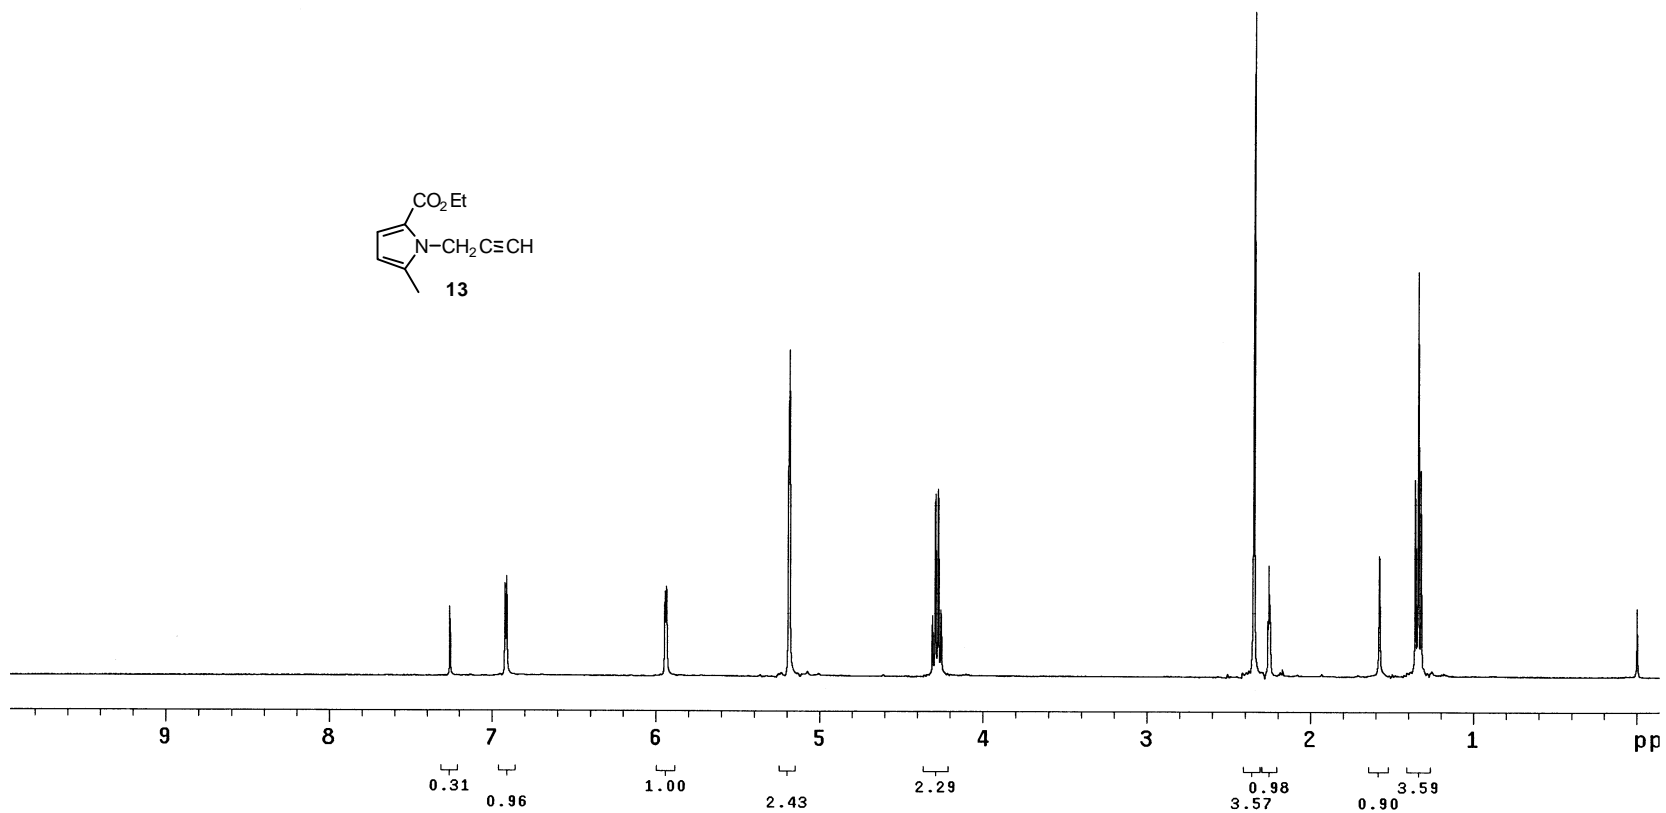

JYM-699-C

Sample: JYM-699-C  
Sample ID: s\_42\_JYM-699-C\_koo-4\_20130702\_01  
File: /home/walkup2/vnmrsys/data/koo-4/JYM-699-C\_Carbon\_01.fid

Pulse Sequence: s2pu1

Solvent: cdc13  
Ambient temperature  
Sample #42, Operator: walkup2  
File: JYM-699-C\_Carbon\_01  
VNMR-400 "400MR"

Relax. delay 1.000 sec  
Pulse 45.0 degrees  
Acq. time 1.300 sec  
Width 24509.8 Hz  
128 repetitions  
OBSERVE C13, 100.5886361 MHz  
DECOUPLE H1, 400.0360169 MHz  
Power 42 dB  
continuously on  
WALTZ-16 modulated  
DATA PROCESSING  
Line broadening 0.5 Hz  
FT size 65536  
Total time 4 min, 56 sec

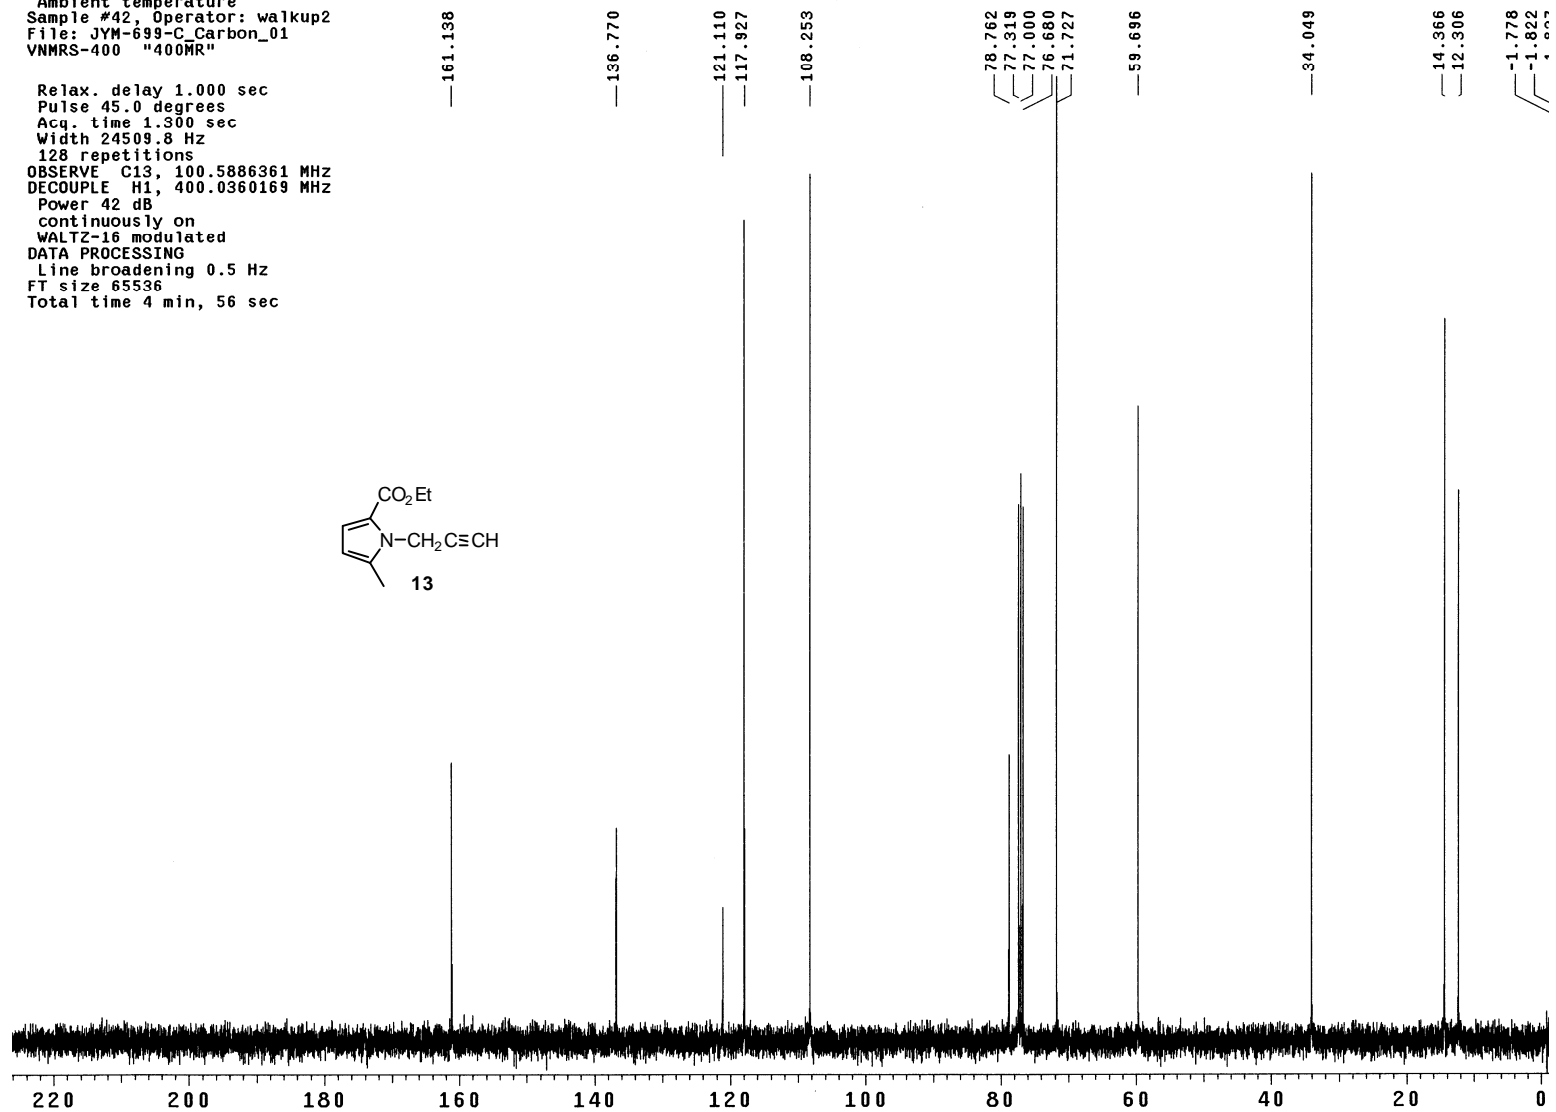



JYM-466

Sample: JYM-466  
Sample ID: s\_42\_JYM-466\_koo-4\_20130128\_01  
File: /home/walkup2/vnmrsys/data/koo-4/JYM-466\_Proton\_01.fid

Pulse Sequence: s2pu1

Solvent: cdc13

Ambient temperature

Sample #42, Operator: wa

File: JYM-466\_Proton\_01

VNMRS-400 "400MR"

Relax. delay 1.000 sec  
Pulse 45.0 degrees  
Acq. time 2.049 sec  
Width 6410.3 Hz  
8 repetitions  
OBSERVE H1, 400.0340095 MHz  
DATA PROCESSING  
Line broadening 0.5 Hz  
FT size 65536  
Total time 0 min, 31 sec

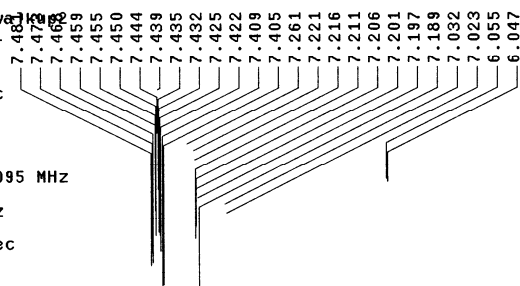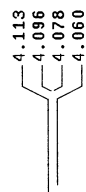

2.023

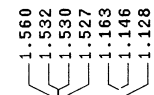

-0.000

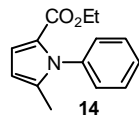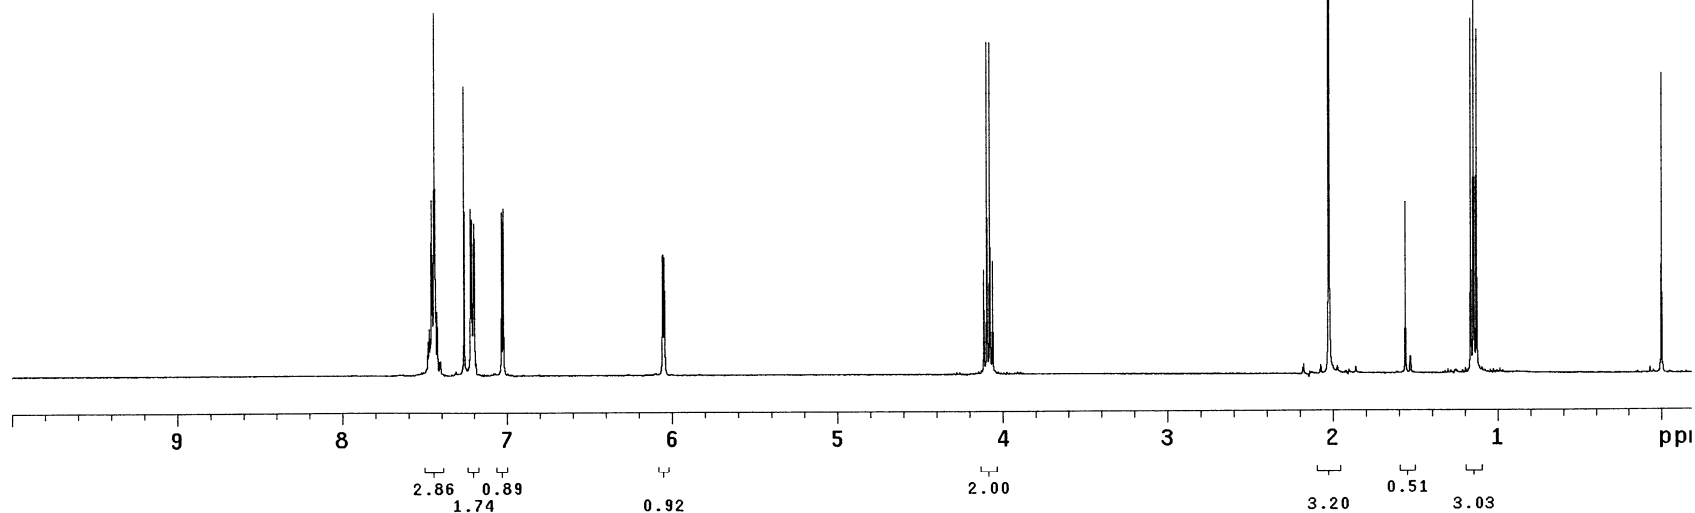

JYM-466-C

Sample: JYM-466-C  
Sample ID: s\_43\_JYM-466-C\_koo-4\_20130829\_01  
File: /home/walkup2/vnmrSYS/data/koo-4/JYM-466-C\_Carbon\_01.fid

Pulse Sequence: s2pu1

Solvent: cdc13  
Ambient temperature  
Sample #43, Operator: walkup2  
File: JYM-466-C\_Carbon\_01  
VNMR-400 "400HR"

Relax. delay 1.000 sec  
Pulse 45.0 degrees  
Acq. time 1.300 sec  
Width 24509.8 Hz  
256 repetitions  
OBSERVE C13, 100.5886442 MHz  
DECOUPLE H1, 400.0360169 MHz  
Power 42 dB  
continuously on  
WALTZ-16 modulated  
DATA PROCESSING  
Line broadening 0.5 Hz  
FT size 65536  
Total time 9 min, 51 sec

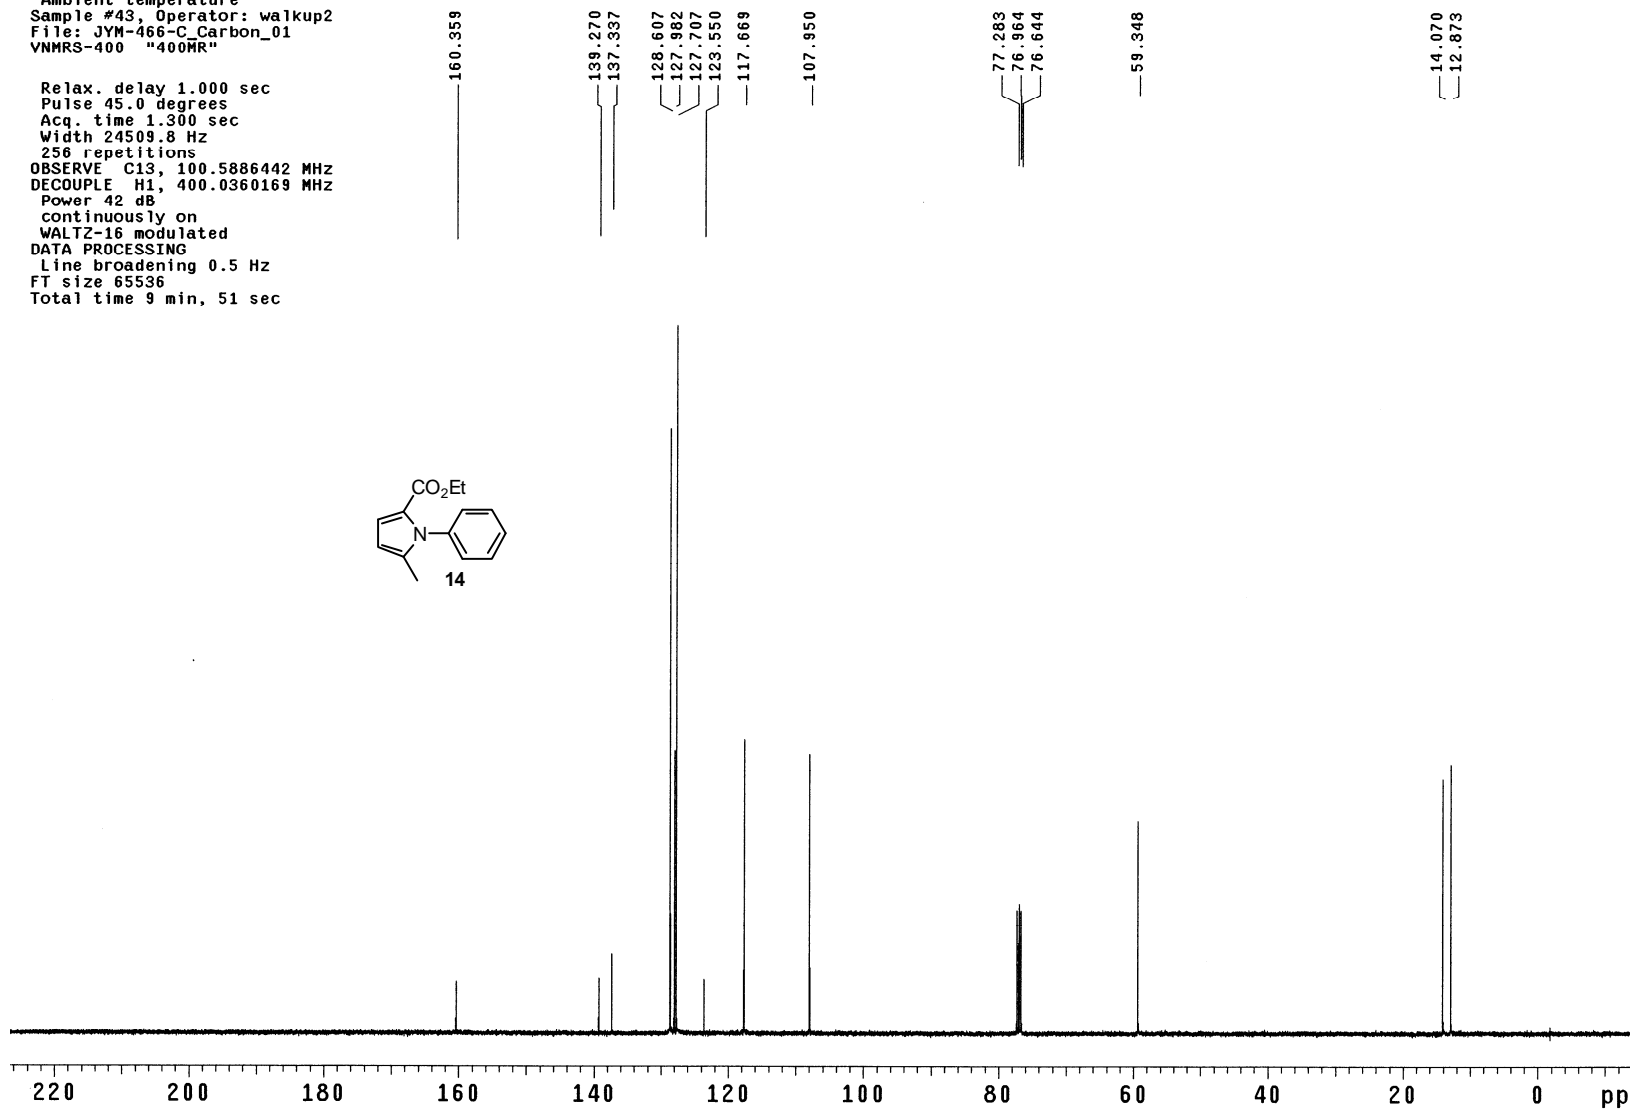

Sample: MD-J-15  
 Sample ID: s\_47\_MD-J-15\_koo-4\_20140527\_01  
 File: /home/walkup2/vnmr/sys/data/koo-4/MD-J-15\_Proton\_01.fid

Pulse Sequence: s2pu1

Solvent: cdc13  
 Ambient temperature  
 Sample #47, Operator: walkup  
 File: MD-J-15\_Proton\_01  
 VNMR5-400 "400MR"

Relax. delay 1.000 sec  
 Pulse 45.0 degrees  
 Acq. time 2.049 sec  
 Width 6830.6 Hz  
 8 repetitions  
 OBSERVE H1, 400.0340098 MHz  
 DATA PROCESSING  
 Line broadening 0.5 Hz  
 FT size 65536  
 Total time 0 min, 31 sec

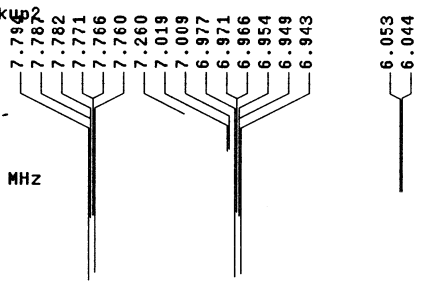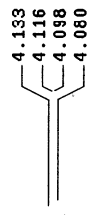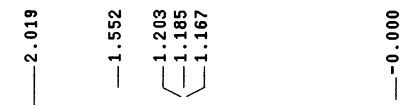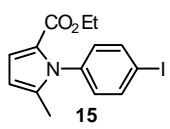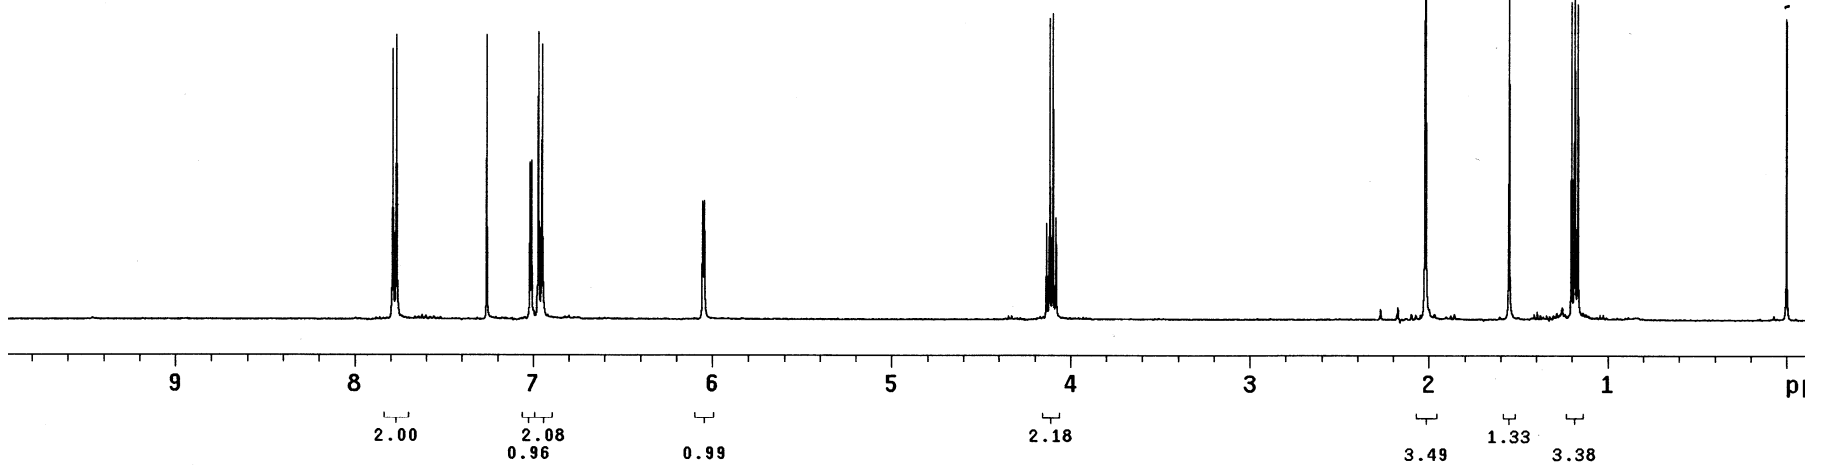

Sample: MD-J-15  
Sample ID: s\_47\_MD-J-15\_koo-4\_20140603\_01  
File: /home/walkup2/vnmr/sys/data/koo-4/MD-J-15\_Carbon\_02.fid

Pulse Sequence: s2pu1  
Solvent: cdc13  
Ambient temperature  
Sample #47, Operator: walkup2  
File: MD-J-15\_Carbon\_02  
VNMR-400 "400MR"

Relax. delay 1.000 sec  
Pulse 45.0 degrees  
Acq. time 1.300 sec  
Width 24509.8 Hz  
512 repetitions  
OBSERVE C13, 100.5886348 MHz  
DECOUPLE H1, 400.0360169 MHz  
Power 42 dB  
continuously on  
WALTZ-16 modulated  
DATA PROCESSING  
Line broadening 0.5 Hz  
FT size 65536  
Total time 19 min, 42 sec

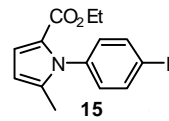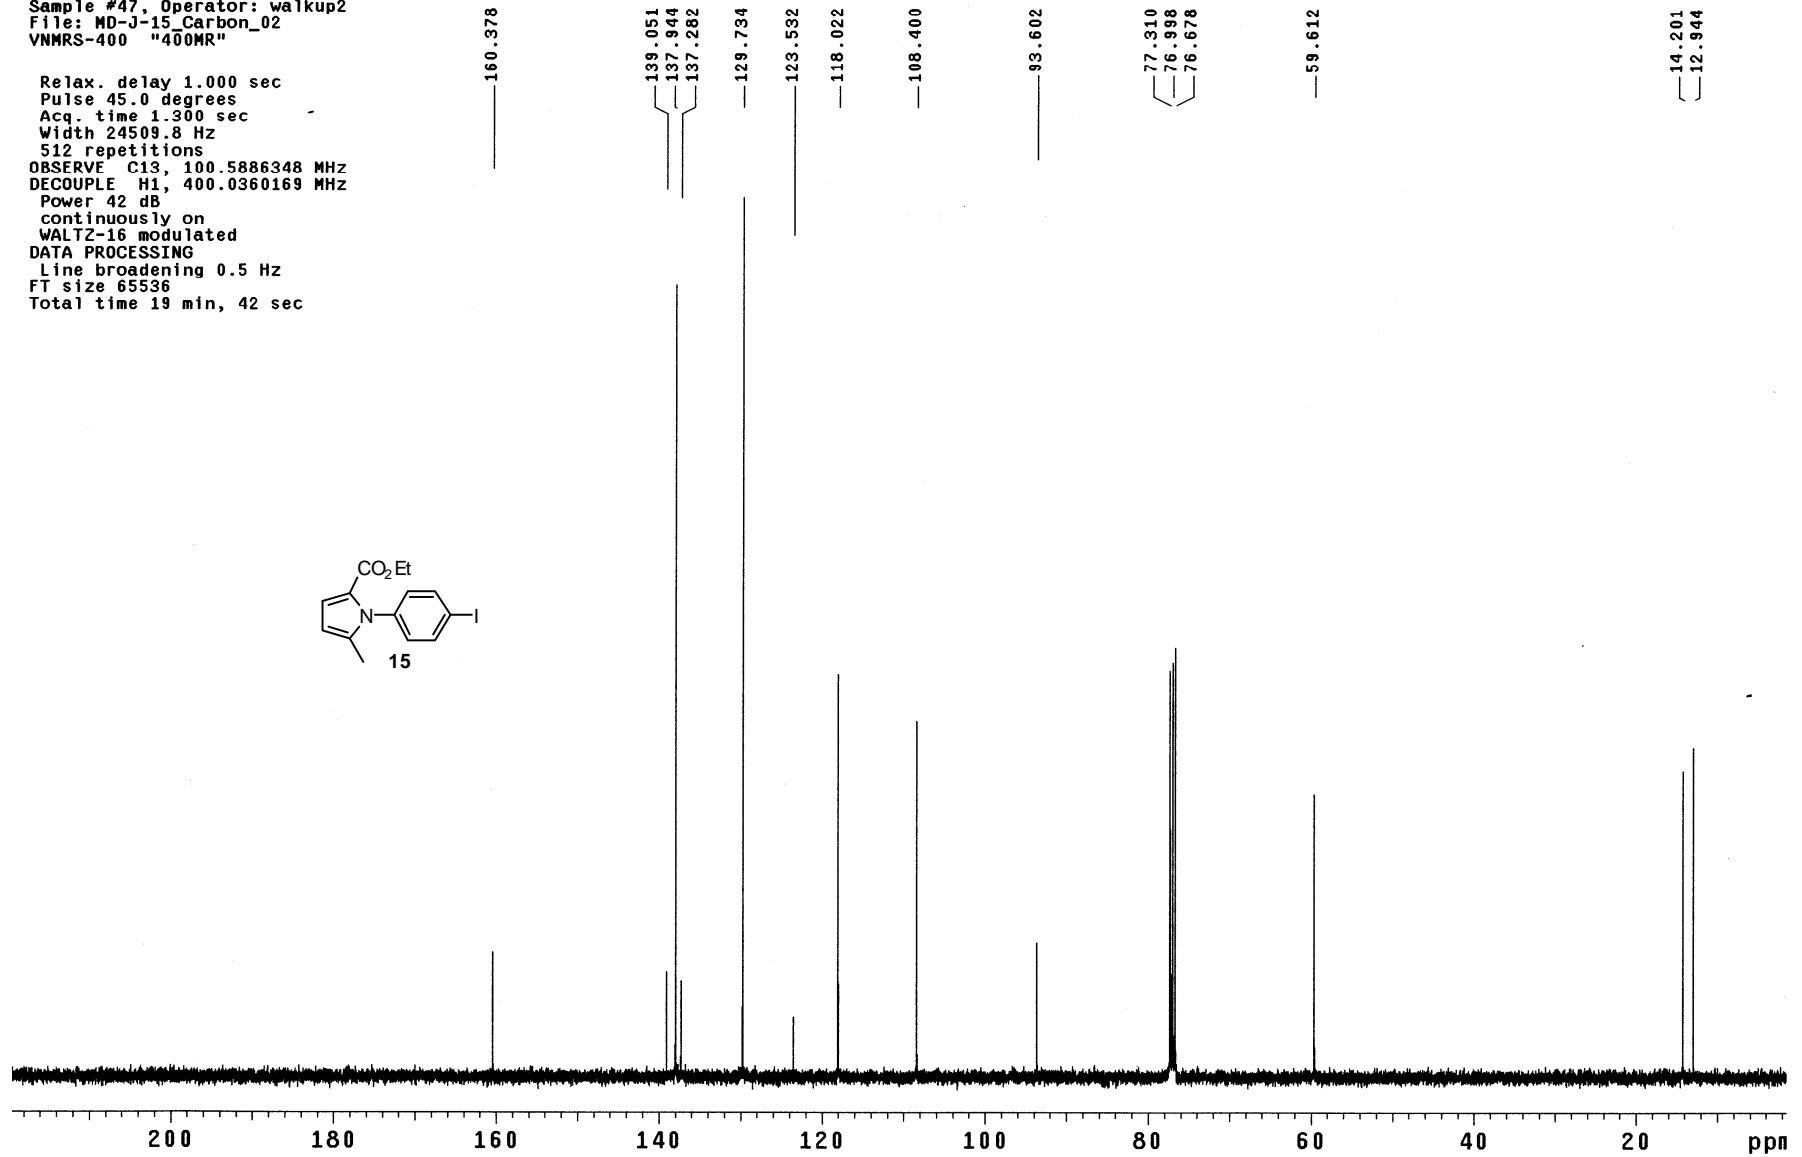

JYM-694

Sample: JYM-694  
Sample ID: s\_43\_JYM-694\_koo-4\_20130702\_01  
File: /home/walkup2/vnmrsys/data/koo-4/JYM-694\_Proton\_01.fid

Pulse Sequence: s2pu1

Solvent: cdc13  
Ambient temperature  
Sample #43, Operator: walkup2  
File: JYM-694\_Proton\_01  
VNMR5-400 "400MR"

Relax. delay 1.000 sec  
Pulse 45.0 degrees  
Acq. time 2.049 sec  
Width 6410.3 Hz  
8 repetitions  
OBSERVE H1, 400.0340097 MHz  
DATA PROCESSING  
Line broadening 0.5 Hz  
FT size 65536  
Total time 0 min, 31 sec

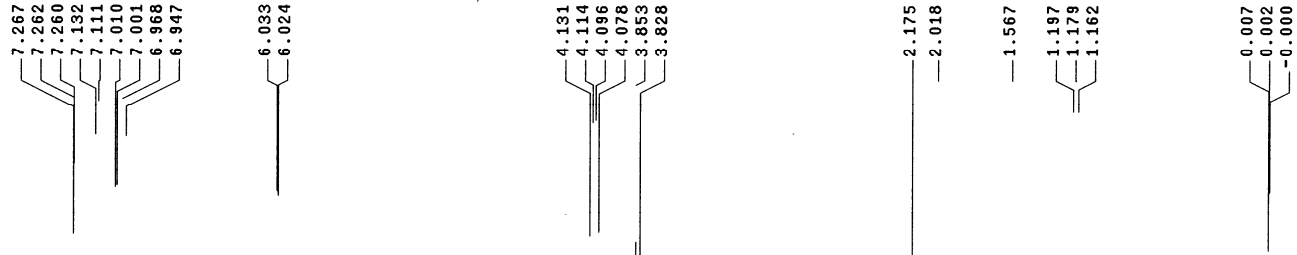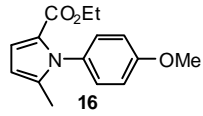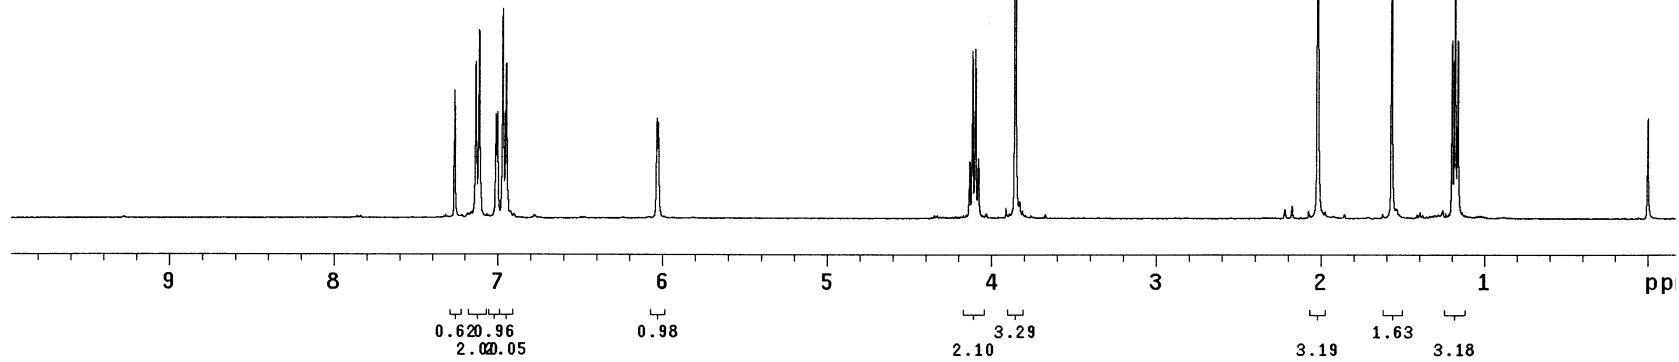

JYM-694-C

Sample: JYM-694-C  
Sample ID: s\_33\_JYM-694-C\_koo-4\_20130703\_01  
File: /home/walkup2/vnmrSYS/data/koo-4/JYM-694-C\_Carbon\_01.fid

Pulse Sequence: s2pu1

Solvent: cdcl3  
Ambient temperature  
Sample #33, Operator: walkup  
File: JYM-694-C\_Carbon\_01  
VNMR-400 "400MR"

Relax. delay 1.000 sec  
Pulse 45.0 degrees  
Acq. time 1.300 sec  
Width 24509.8 Hz  
128 Repetitions  
OBSERVE C13, 100.5886384 MHz  
DECOUPLE H1, 400.0360169 MHz  
Power 42 dB  
continuously on  
WALTZ-16 modulated  
DATA PROCESSING  
Line broadening 0.5 Hz  
FT size 65536  
Total time 4 min, 56 sec

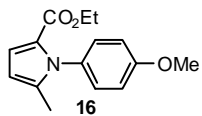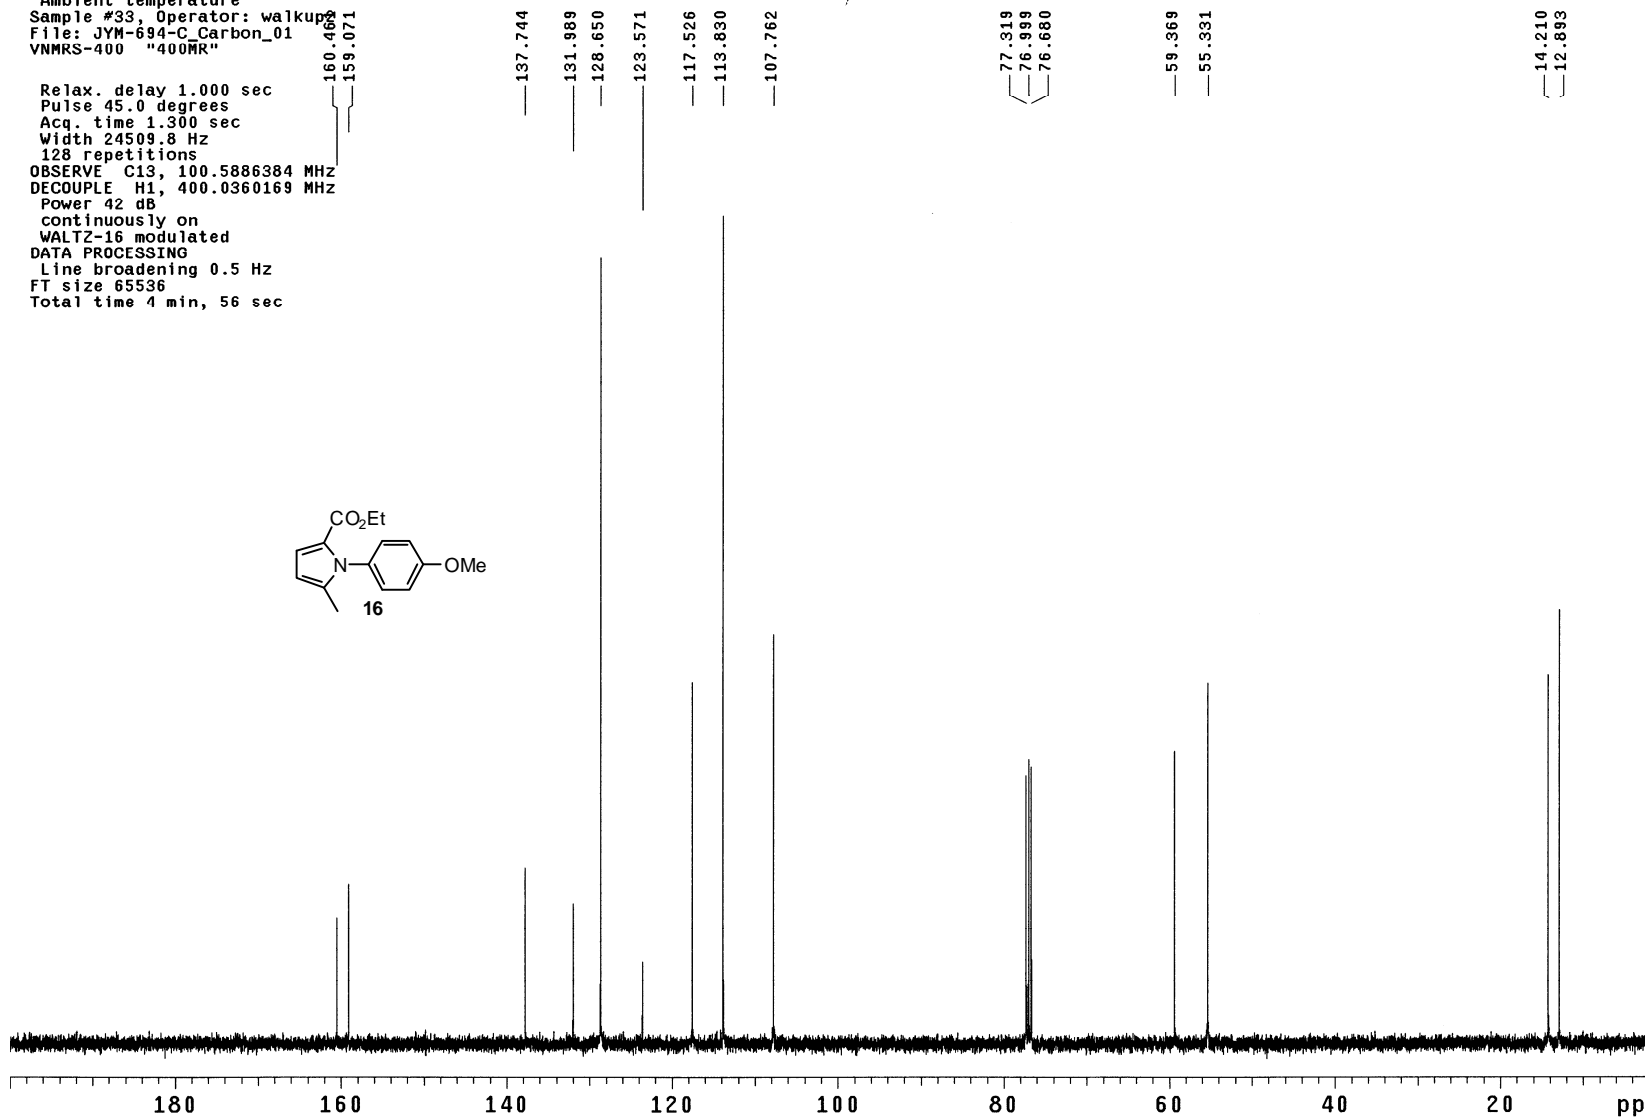

JYM-726

Sample: JYM-726  
Sample ID: s\_47\_JYM-726\_koo-4\_20130715\_01  
File: /home/walkup2/vnmr/sys/data/koo-4/JYM-726\_Proton\_01.fid

Pulse Sequence: s2pu1

Solvent: cdc13

Ambient temperature

Sample #47, Operator: wa

File: JYM-726\_Proton\_01

VNMR5-400 "400MR"

Relax. delay 1.000 sec  
Pulse 45.0 degrees  
Acq. time 2.049 sec  
Width 6410.3 Hz  
3 repetitions  
OBSERVE H1, 400.0340093 MHz  
DATA PROCESSING  
Line broadening 0.5 Hz  
FT size 65536  
Total time 0 min, 31 sec

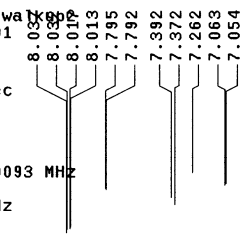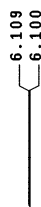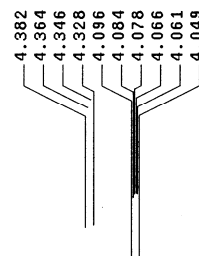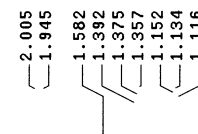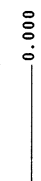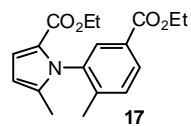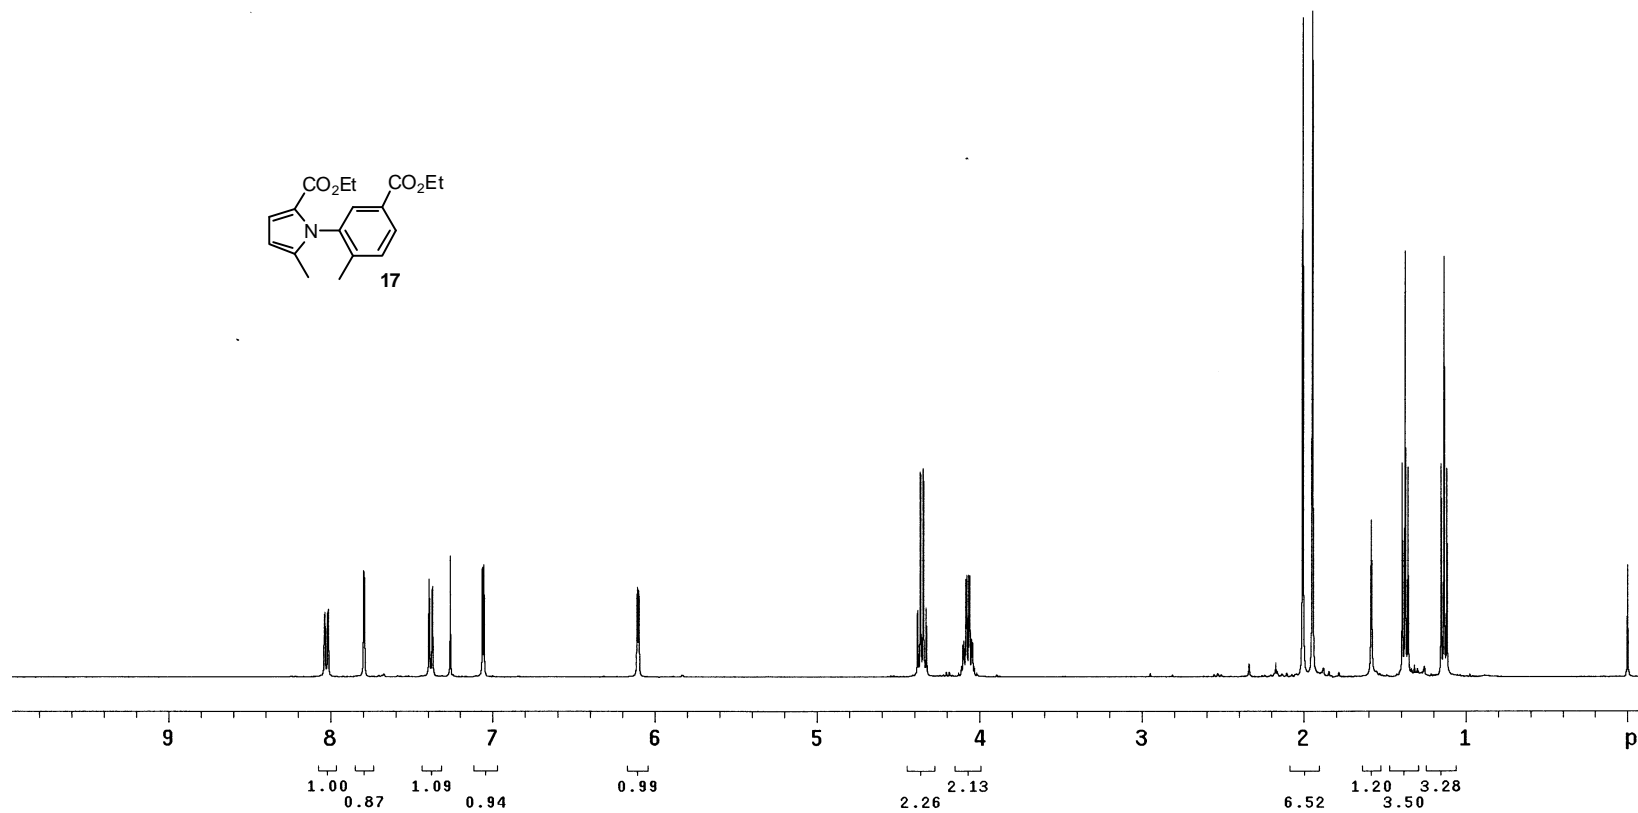

JYM-726-C

Sample: JYM-726-C  
Sample ID: s\_44\_JYM-726-C\_koo-4\_20130716\_01  
File: /home/walkup2/vnmrsys/data/koo-4/JYM-726-C\_Carbon\_01.fid

Pulse Sequence: s2pu1

Solvent: cdc13  
Ambient temperature  
Sample #44, Operator: walkup2  
File: JYM-726-C\_Carbon\_01  
VNMR-400 "400MR"

Relax. delay 1.000 sec  
Pulse 45.0 degrees  
Acq. time 1.300 sec  
Width 24509.8 Hz  
128 repetitions  
OBSERVE C13, 100.5886371 MHz  
DECOUPLE H1, 400.0360169 MHz  
Power 42 dB  
continuously on  
WALTZ-16 modulated  
DATA PROCESSING  
Line broadening 0.5 Hz  
FT size 65536  
Total time 4 min, 56 sec

165.836  
160.251

141.743  
138.746  
136.597  
130.396  
129.555  
128.065  
128.390  
123.071  
117.792

108.378

77.310  
76.990  
76.678

60.988  
59.478

17.383  
14.245  
14.104  
12.579

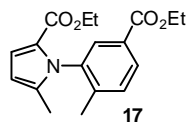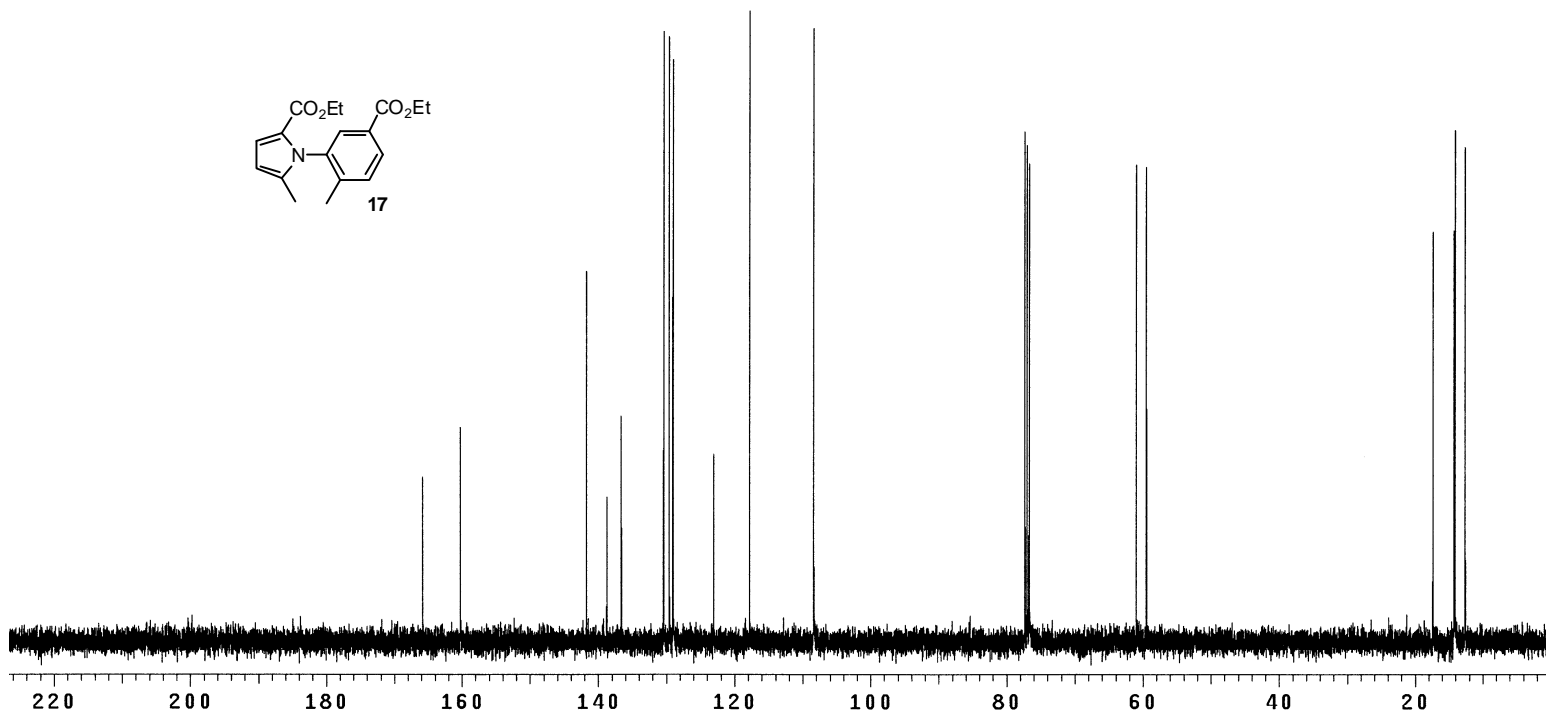



JYM-690

Sample: JYM-690  
Sample ID: s\_44\_JYM-690\_koo-4\_20130628\_01  
File: /home/walkup2/vnmr/sys/data/koo-4/JYM-690\_Proton\_01.fid

Pulse Sequence: s2pul  
Solvent: cdc13  
Ambient temperature  
Sample #44, Operator: walkup2  
File: JYM-690\_Proton\_01  
VNMR-400 "400MR"

Relax. delay 1.000 sec  
Pulse 45.0 degrees  
Acq. time 2.049 sec  
Width 6410.3 Hz  
8 repetitions  
OBSERVE H1, 400.0340105 MHz  
DATA PROCESSING  
Line broadening 0.5 Hz  
FT size 65536  
Total time 0 min, 31 sec

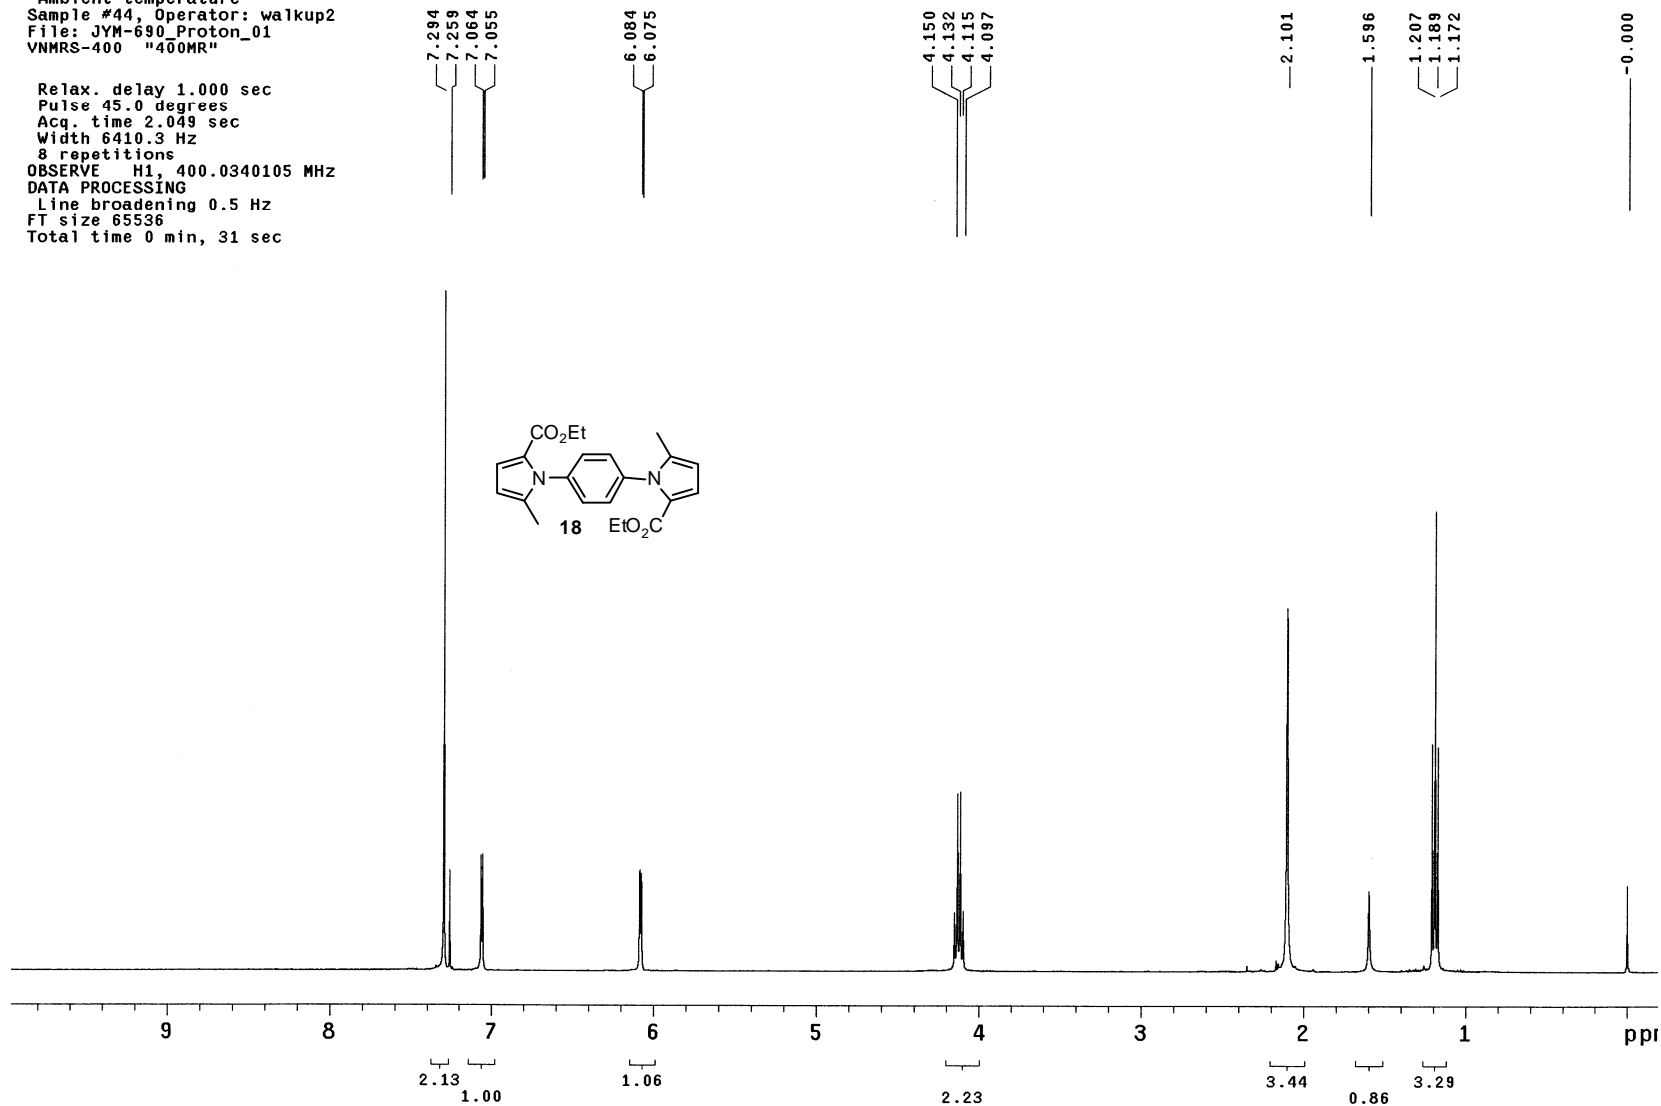

JYM-690-C

Sample: JYM-690-C

Sample ID: s\_46\_JYM-690-C\_koo-4\_20130628\_01

File: /home/walkup2/vnmrsys/data/koo-4/JYM-690-C\_Carbon\_01.fid

Pulse Sequence: s2pu1

Solvent: cdc13

Ambient temperature

Sample #46, Operator: walkup

File: JYM-690-C\_Carbon\_01

VNMR5-400 "400MR"

Relax. delay 1.000 sec

Pulse 45.0 degrees

Acq. time 1.300 sec

Width 24509.8 Hz

218 repetitions

OBSERVE C13, 100.5886361 MHz

DECOUPLE H1, 400.0360169 MHz

Power 42 dB

continuously on

WALTZ-16 modulated

DATA PROCESSING

Line broadening 0.5 Hz

FT size 65536

Total time 8 min, 23 sec

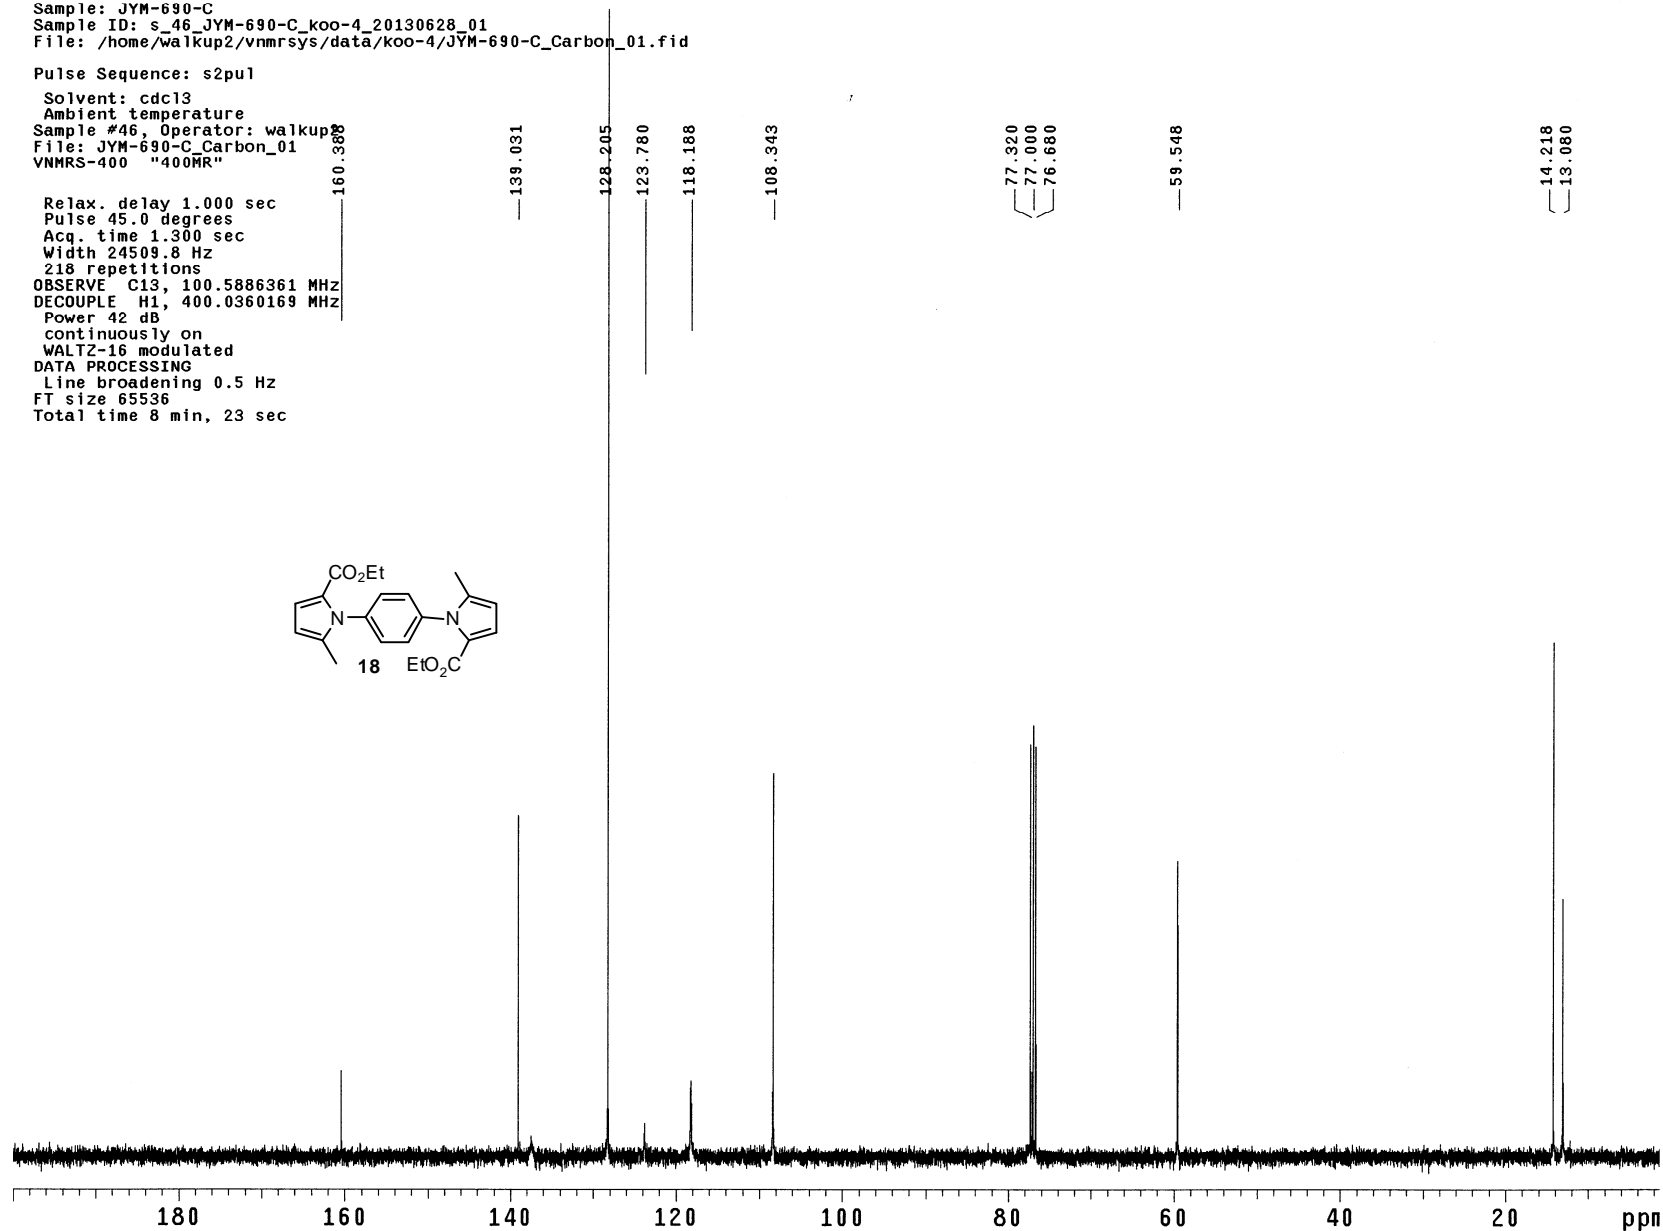

JYM-695-1

Sample: JYM-695-1  
Sample ID: s\_44\_JYM-695-1\_koo-4\_20130702\_01  
File: /home/walkup2/vnmrsvs/data/koo-4/JYM-695-1\_Proton\_01.fid

Pulse Sequence: s2pu1

Solvent: cdc13  
Ambient temperature  
Sample #44, Operator: walkup  
File: JYM-695-1\_Proton\_01  
VNMR-400 "400MR"

Relax. delay 1.000 sec  
Pulse 45.0 degrees  
Acq. time 2.049 sec  
Width 6410.3 Hz  
8 repetitions  
OBSERVE H1, 400.0340093 MHz  
DATA PROCESSING  
Line broadening 0.5 Hz  
FT size 65536  
Total time 0 min, 31 sec

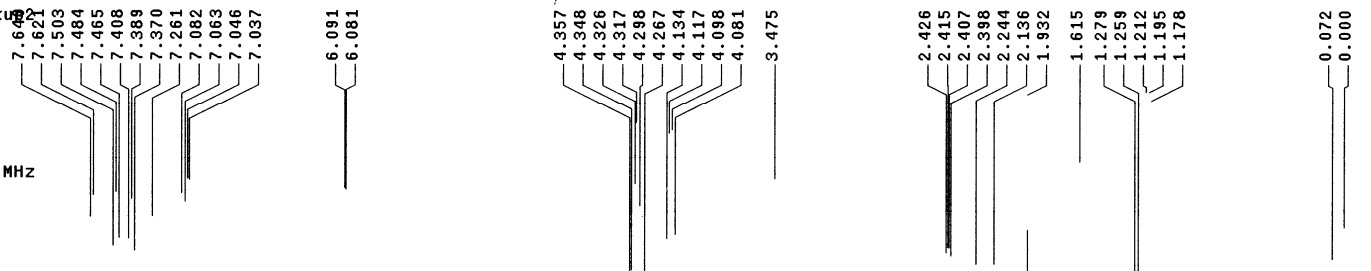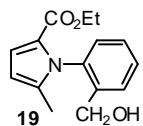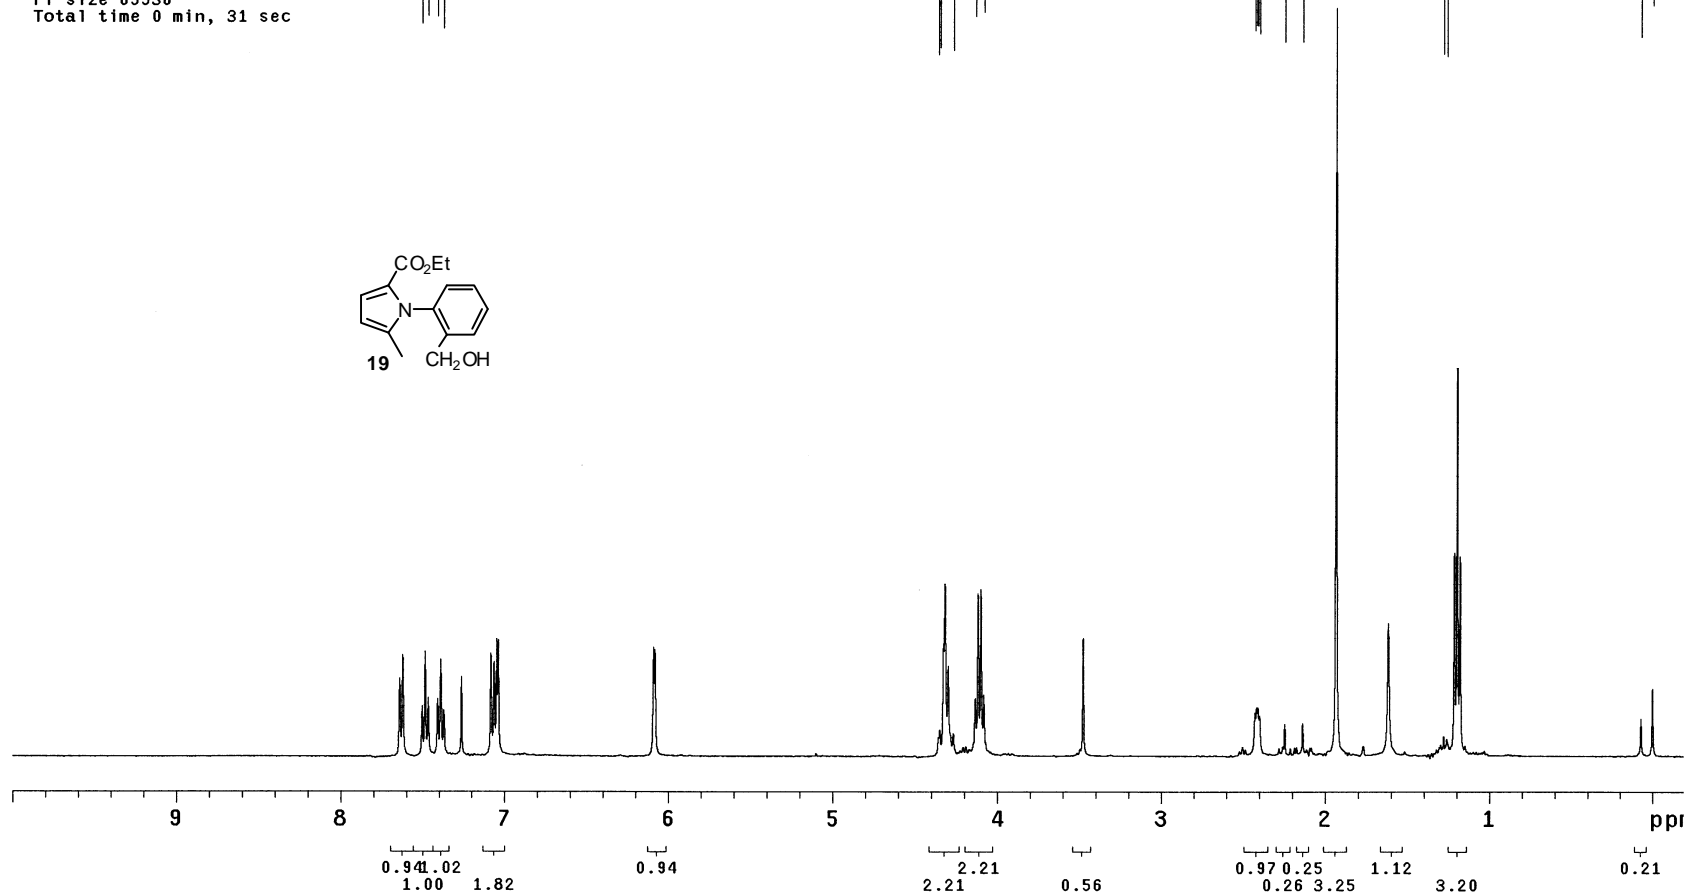

JYM-695-1-C

Sample: JYM-695-1-C  
Sample ID: s\_41\_JYM-695-1-C\_koo-4\_20130702\_01  
File: /home/walkup2/vnmrSYS/data/koo-4/JYM-695-1-C\_Carbon\_01.fid

Pulse Sequence: s2pu1

Solvent: cdcl3  
Ambient temperature  
Sample #41, Operator: walkup2  
File: JYM-695-1-C\_Carbon\_01  
VNMR5-400 "400MR"

Relax. delay 1.000 sec  
Pulse 45.0 degrees  
Acq. time 1.300 sec  
Width 24509.8 Hz  
128 repetitions  
OBSERVE C13, 100.5886436 MHz  
DECOUPLE H1, 400.0360169 MHz  
Power 42 dB  
continuously on  
WALTZ-16 modulated  
DATA PROCESSING  
Line broadening 0.5 Hz  
FT size 65536  
Total time 4 min, 56 sec

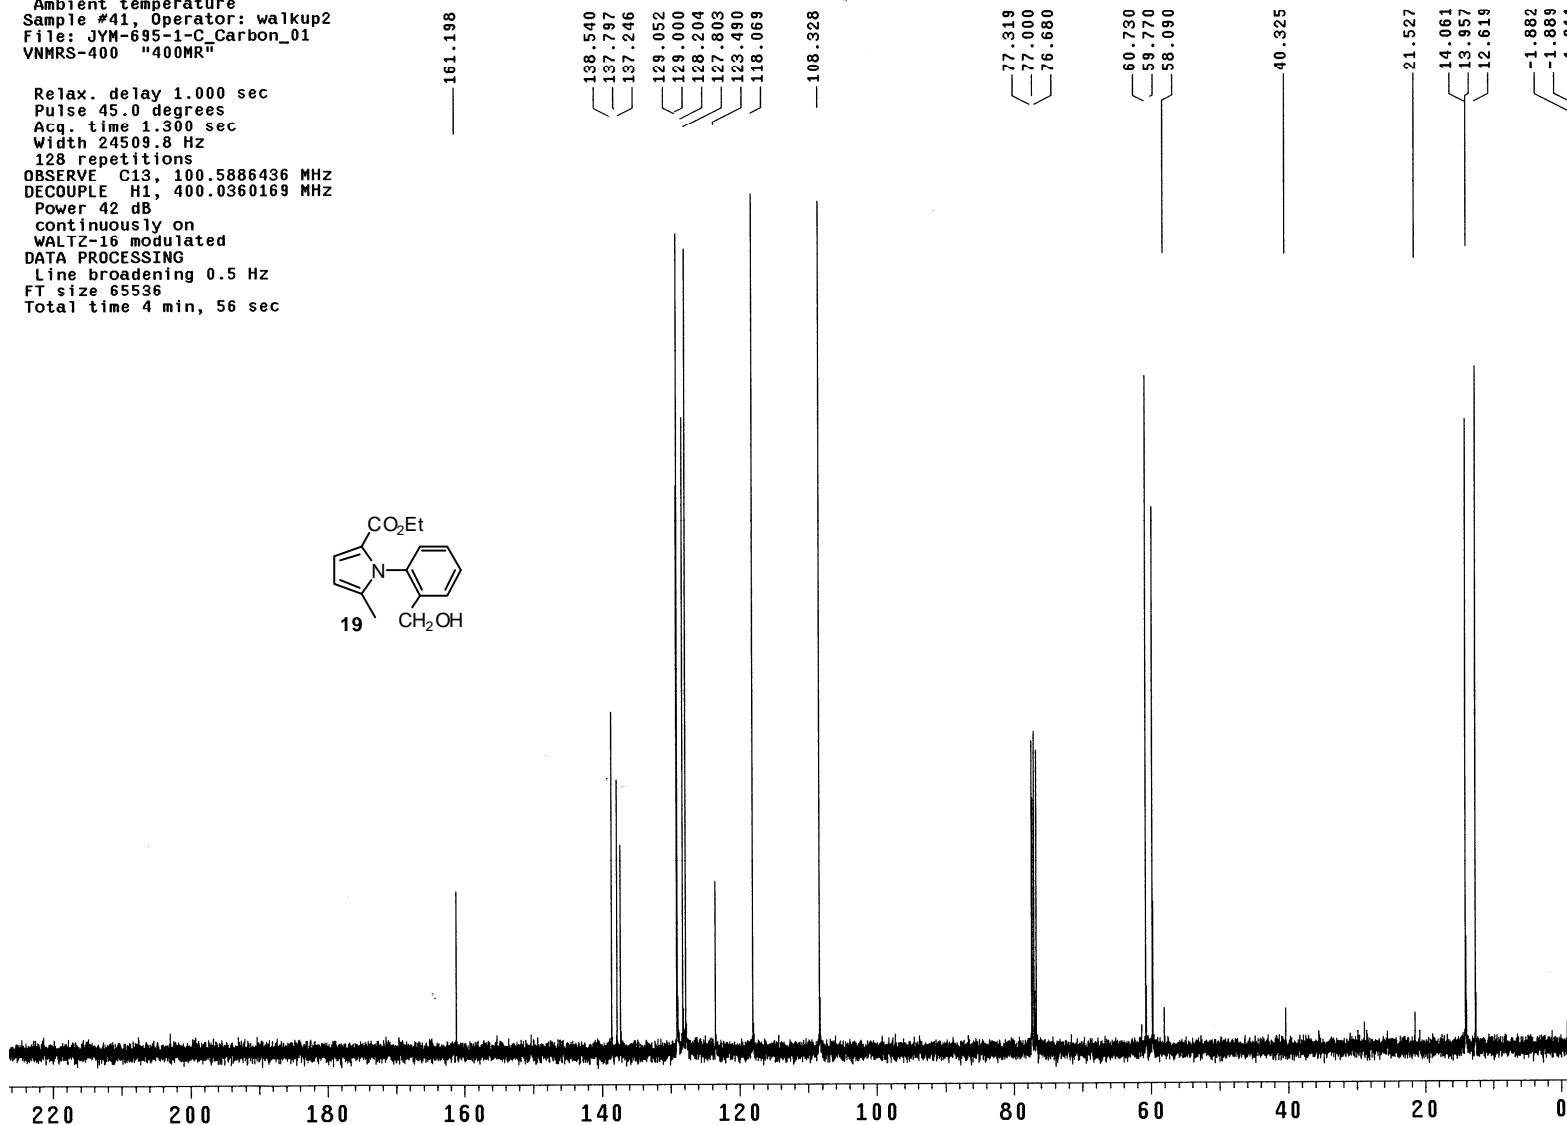

JYM-703

Sample: JYM-703

Sample ID: s\_40\_JYM-703\_koo-4\_20130704\_01

File: /home/walkup2/vnmrsys/data/koo-4/JYM-703\_Proton\_01.fid

Pulse Sequence: s2pu1

Solvent: cdc13

Ambient temperature

Sample #40, Operator: wa

File: JYM-703\_Proton\_01

VNMRS-400 "400MR"

Relax. delay 1.000 sec  
Pulse 45.0 degrees  
Acq. time 2.049 sec  
Width 6410.3 Hz  
8 repetitions  
OBSERVE H1, 400.0340093 MHz  
DATA PROCESSING  
Line broadening 0.5 Hz  
FT size 65536  
Total time 0 min, 31 sec

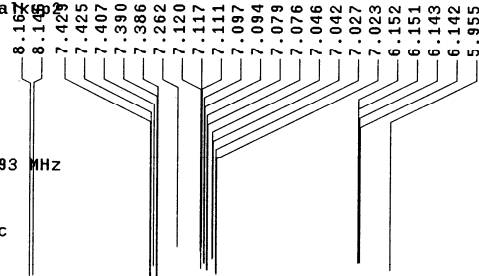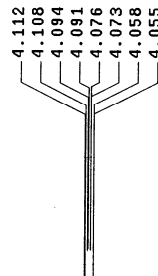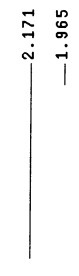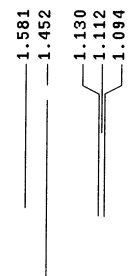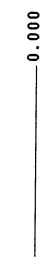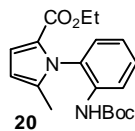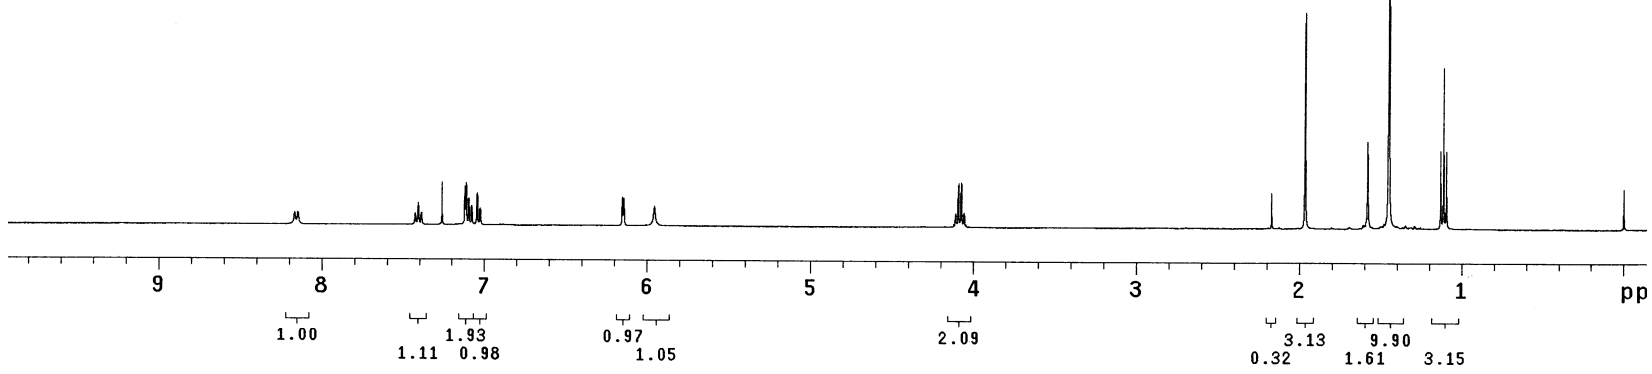

JYM-703-C

Sample: JYM-703-C

Sample ID: s\_46\_JYM-703-C\_Koo-4\_20130708\_01

File: /home/walkup2/vnmr/sys/data/Koo-4/JYM-703-C\_Carbon\_01.fid

Pulse Sequence: s2pu1

Solvent: cdc13

Ambient temperature

Sample #46, Operator: walkup2

File: JYM-703-C\_Carbon\_01

VNMR-400 "400MK"

Relax. delay 1.000 sec

Pulse 45.0 degrees

Acq. time 1.300 sec

Width 24509.8 Hz

128 repetitions

OBSERVE C13, 100.5886358 MHz

DECOUPLE H1, 400.0360169 MHz

Power 42 dB

continuously on

WALTZ-16 modulated

DATA PROCESSING

Line broadening 0.5 Hz

FT size 65536

Total time 4 min, 56 sec

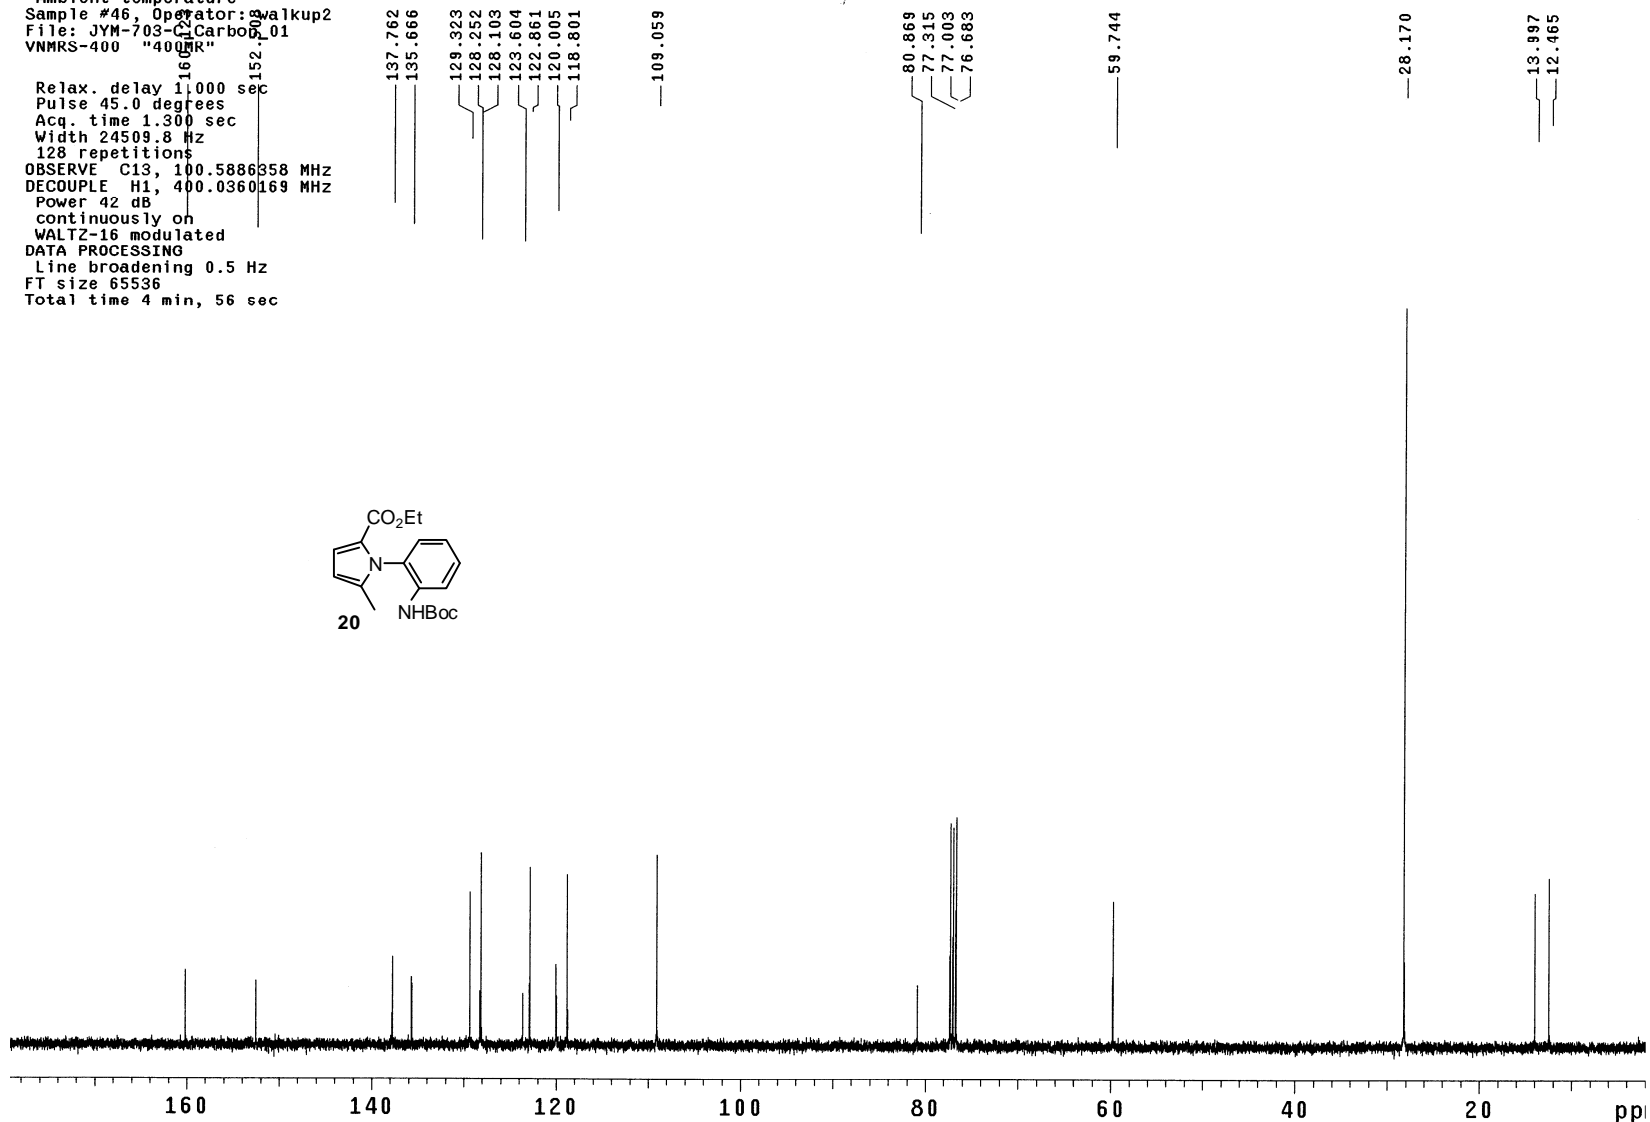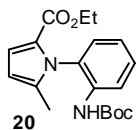

JYM-503

Sample: JYM-503  
Sample ID: s\_42\_JYM-503\_koo-4\_20130227\_01  
File: /home/walkup2/vnmrsys/data/koo-4/JYM-503\_Proton\_01.fid

Pulse Sequence: s2pu1

Solvent: cdc13

Ambient temperature

Sample #42, Operator: walkup

File: JYM-503\_Proton\_01

VNMRS-400 "400MR"

Relax. delay 1.000 sec  
Pulse 45.0 degrees  
Acq. time 2.049 sec  
Width 6830.6 Hz  
8 repetitions  
OBSERVE H1, 400.0340066 MHz  
DATA PROCESSING  
Line broadening 0.5 Hz  
FT size 65536  
Total time 0 min, 31 sec

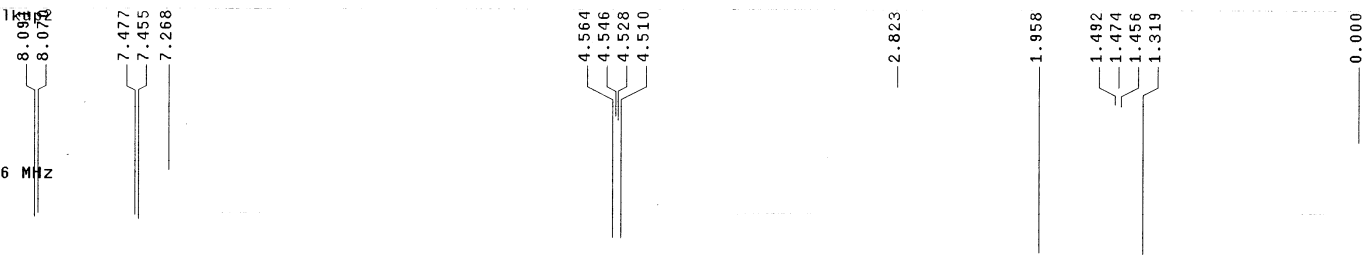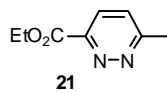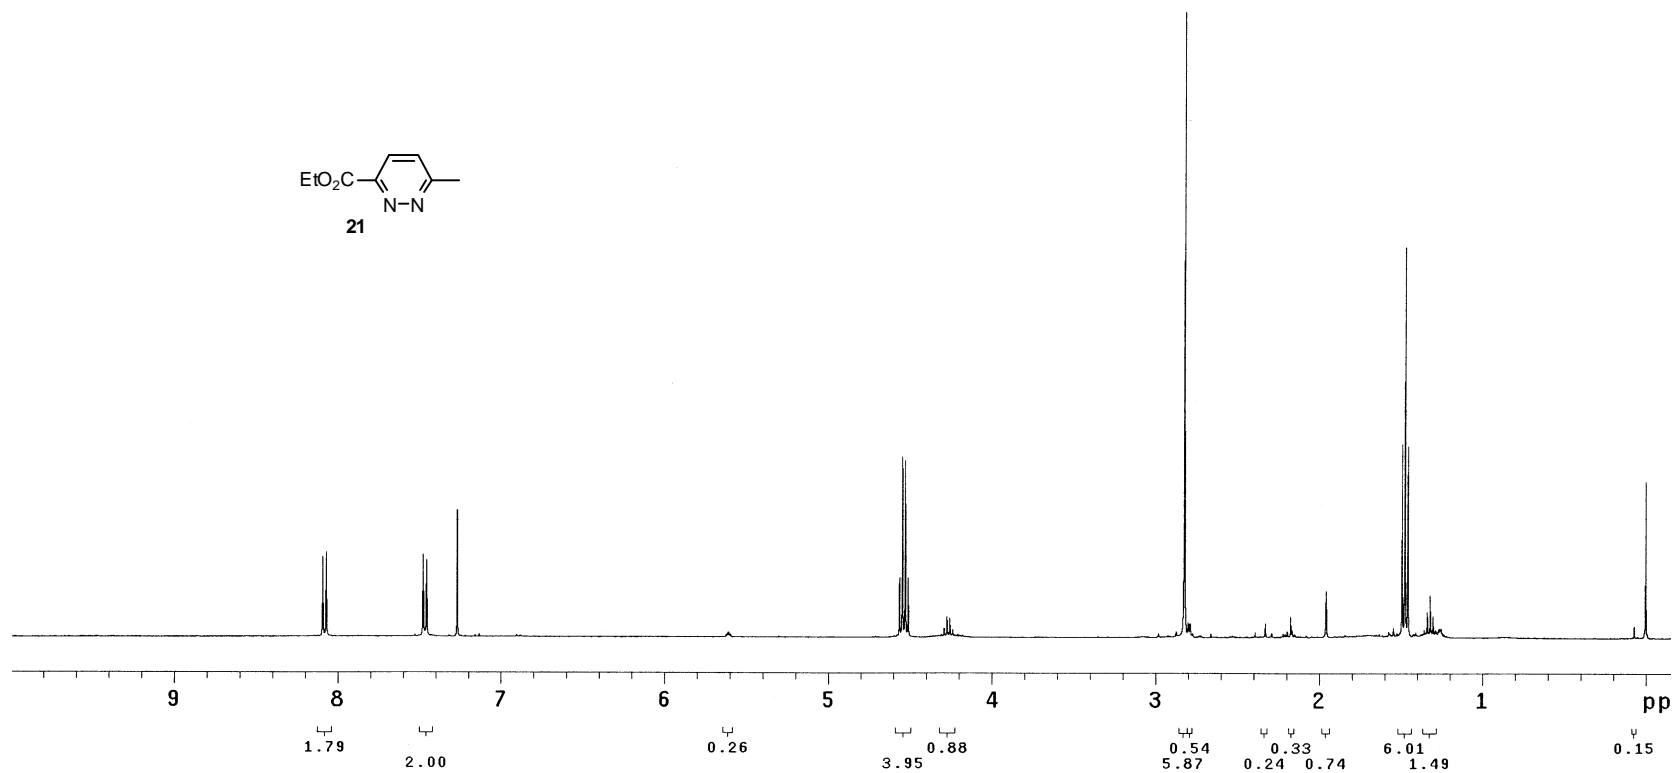

JYM-503-c

Sample: JYM-503-c  
Sample ID: s\_44\_JYM-503-c\_koo-4\_20130227\_01  
File: /home/walkup2/vnmr/sys/data/koo-4/JYM-503-c\_Carbon\_01.fid

Pulse Sequence: s2pul1

Solvent: cdc13  
Ambient temperature  
Sample #44, Operator: walkup2  
File: JYM-503-c\_Carbon\_01  
VNMR5-400 "400MR"

Relax. delay 1.000 sec  
Pulse 45.0 degrees  
Acq. time 1.300 sec  
Width 24509.8 Hz  
512 repetitions  
OBSERVE C13, 100.5886335 MHz  
DECOUPLE H1, 400.0360169 MHz  
Power 42 dB  
continuously on  
WALTZ-16 modulated  
DATA PROCESSING  
Line broadening 0.5 Hz  
FT size 65536  
Total time 19 min, 42 sec

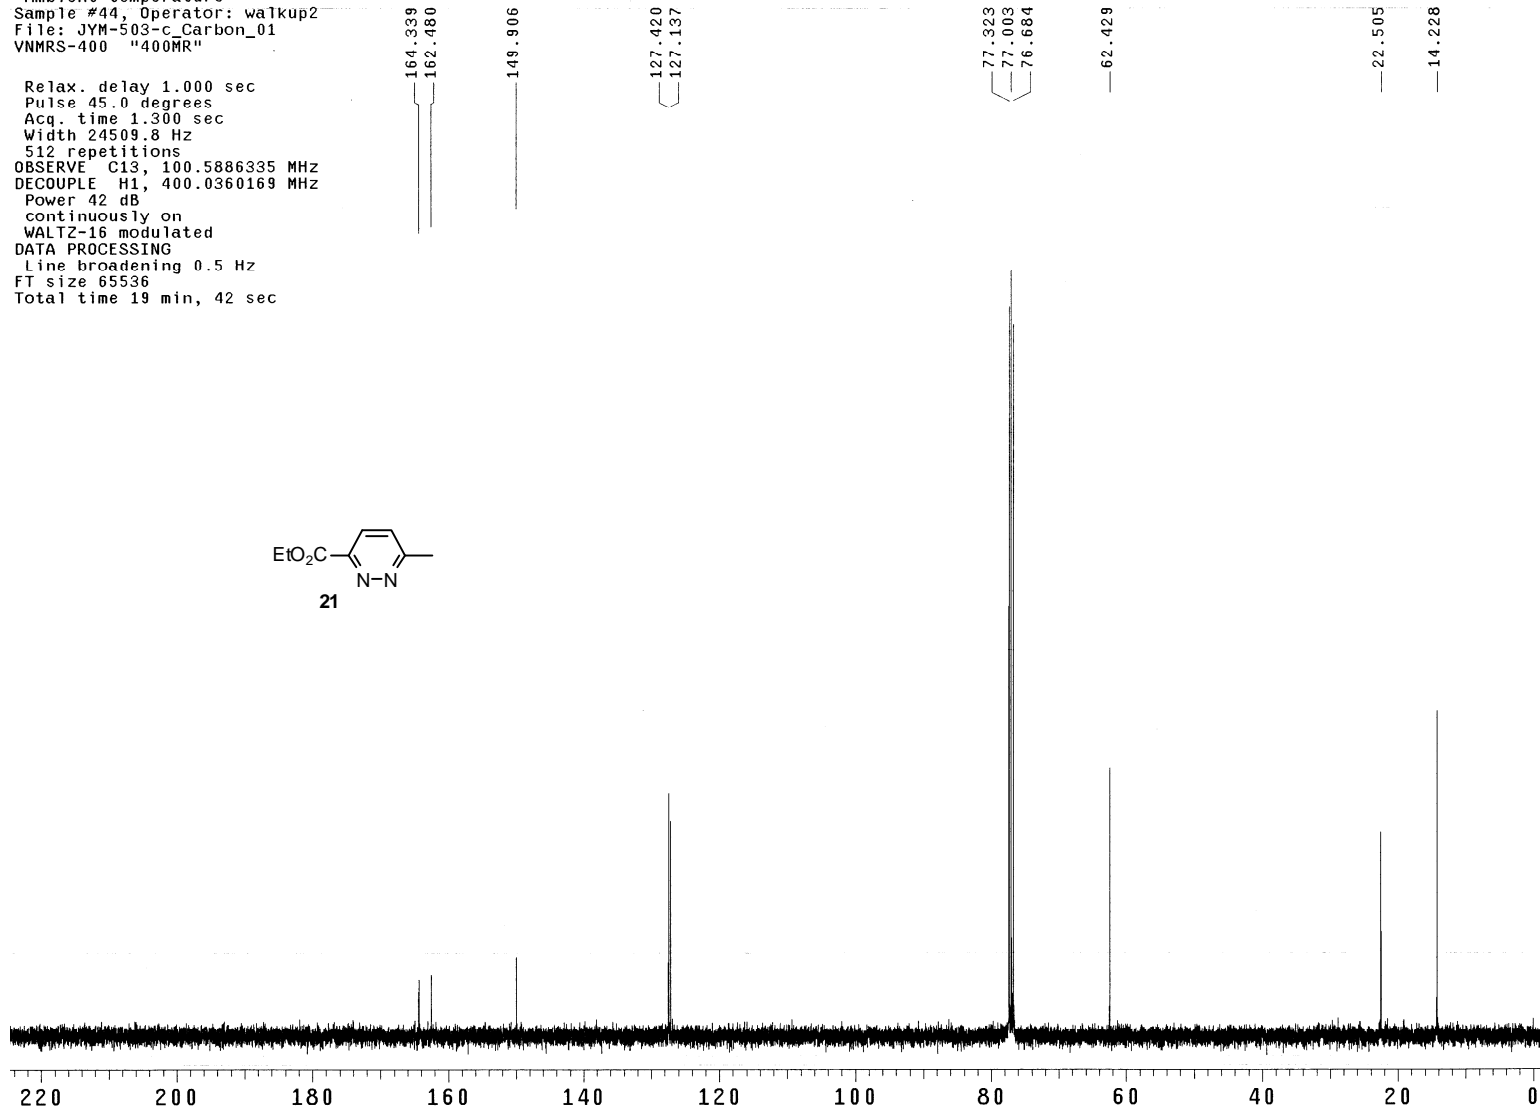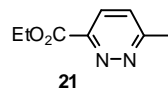



Sample: MD-J-22  
Sample ID: s\_45\_MD-J-22\_koo-4\_20140604\_01  
File: /home/walkup2/vnmr/sys/data/koo-4/MD-J-22\_Proton\_01.fid

Pulse Sequence: s2pu1  
Solvent: cdc13  
Ambient temperature  
Sample #45, Operator: walkup2  
File: MD-J-22\_Proton\_01  
VNMR-400 "400MR"

Relax. delay 1.000 sec  
Pulse 45.0 degrees  
Acq. time 2.049 sec  
Width 6830.6 Hz  
8 repetitions  
OBSERVE H1 400.0340091 MHz  
DATA PROCESSING  
Line broadening 0.5 Hz  
FT size 65536  
Total time 0 min, 31 sec

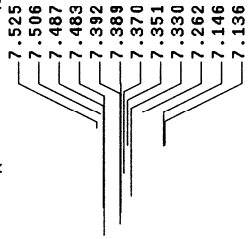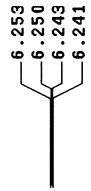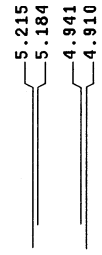

2.446

1.571

0.070  
0.000

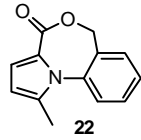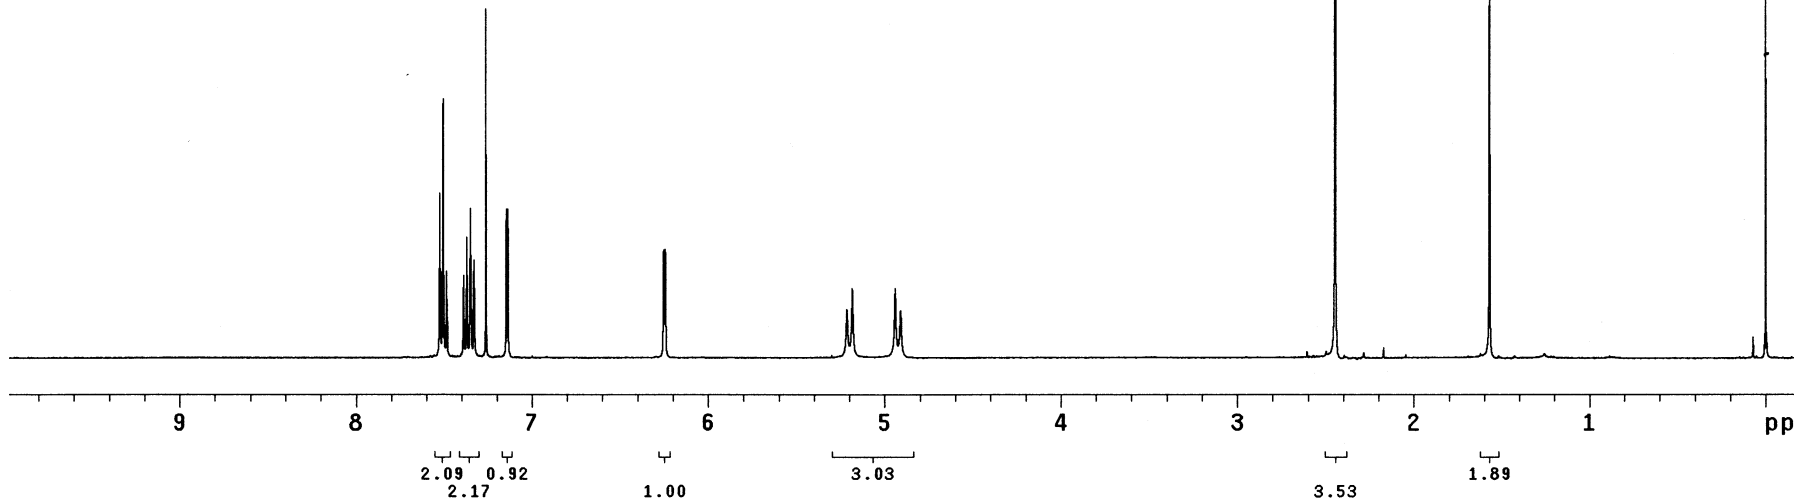

Sample: MD-J-22  
Sample ID: s\_50\_MD-J-22\_koo-4\_20140604\_01  
File: /home/walkup2/vnmr/sys/data/koo-4/MD-J-22\_Carbon\_01.fid

Pulse Sequence: s2pu1  
Solvent: cdc13  
Ambient temperature  
Sample #50, Operator: walkup2  
File: MD-J-22\_Carbon\_01  
VNMR-400 "400MR"

Relax. delay 1.000 sec  
Pulse 45.0 degrees  
Acq. time 1.300 sec  
Width 24509.8 Hz  
512 repetitions  
OBSERVE C13, 100.5886355 MHz  
DECOUPLE H1, 400.0360169 MHz  
Power 42 dB  
continuously on  
WALTZ-16 modulated  
DATA PROCESSING  
Line broadening 0.5 Hz  
FT size 65536  
Total time 19 min, 42 sec

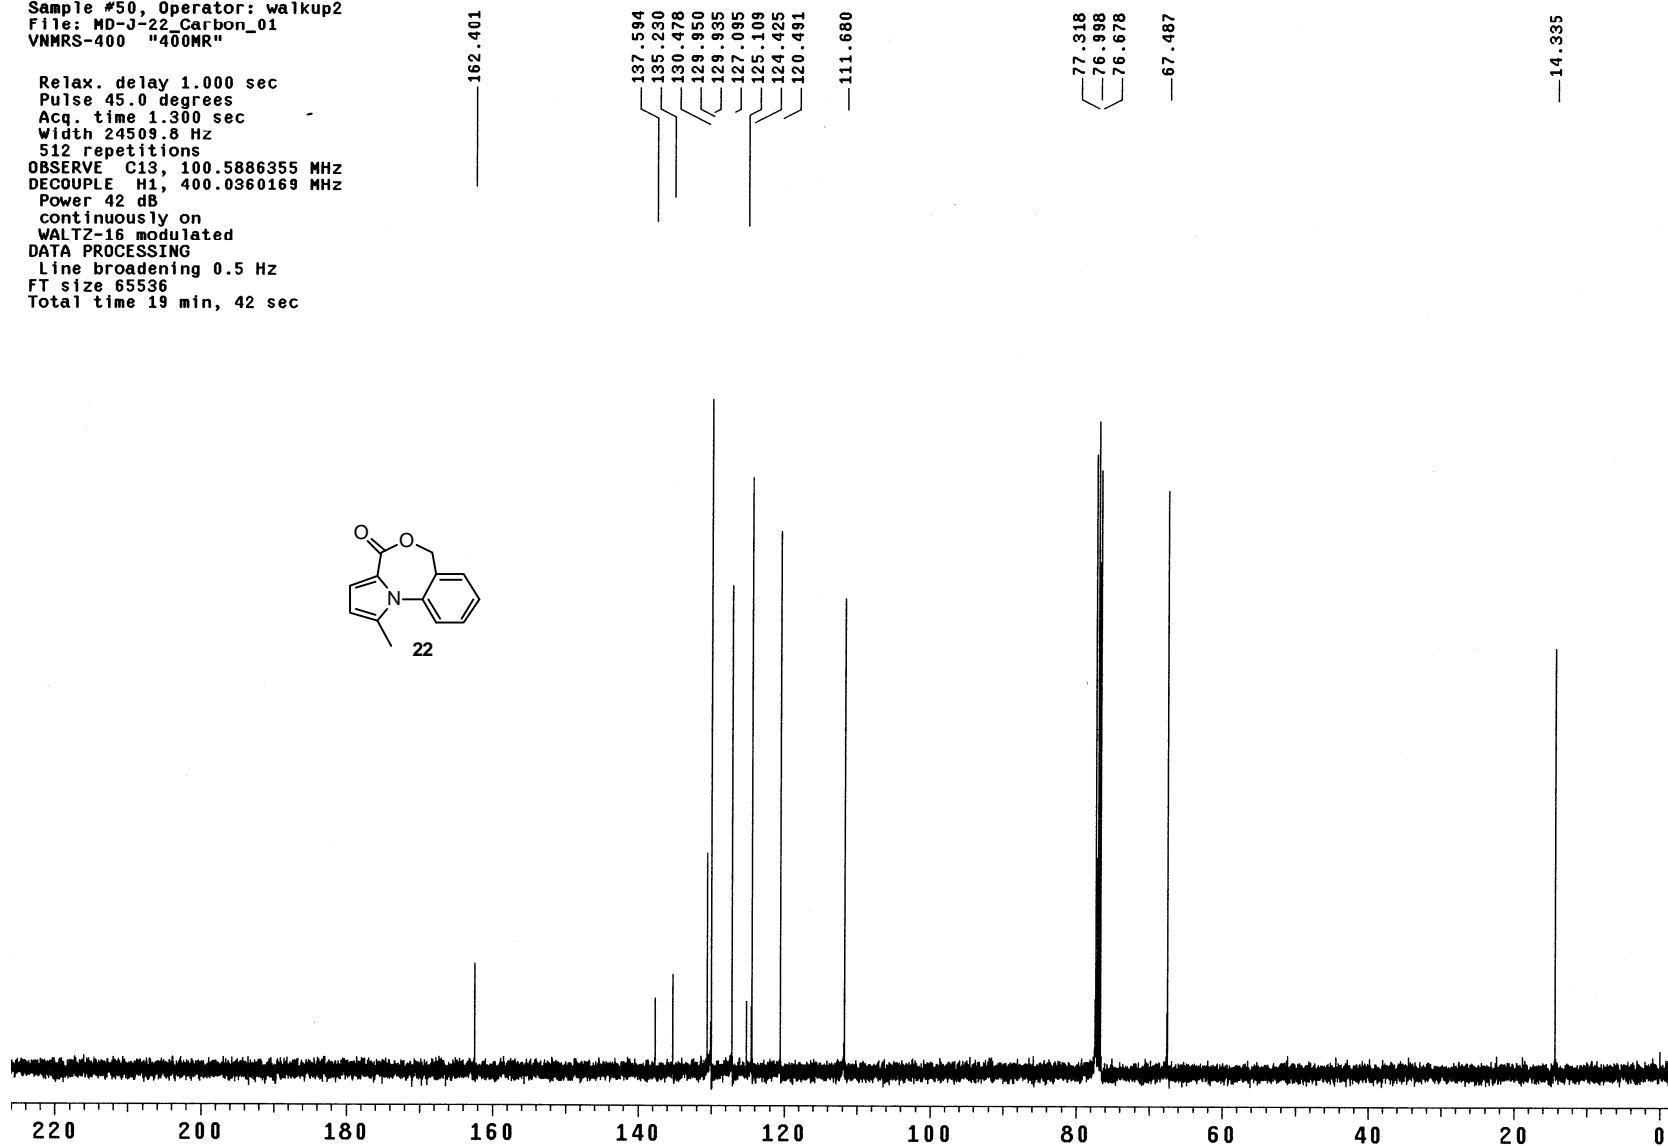

JYM-717

Sample: JYM-717  
Sample ID: s\_43\_JYM-717\_koo-4\_20130709\_01  
File: /home/walkup2/vnmrsys/data/koo-4/JYM-717\_Proton\_01.fid

Pulse Sequence: s2pu1  
Solvent: dmsd  
Ambient temperature  
Sample #43, Operator: walkup  
File: JYM-717\_Proton\_01  
VNMRS-400 "400MR"

Relax. delay 1.000 sec  
Pulse 45.0 degrees  
Acq. time 2.049 sec  
Width 6410.3 Hz  
8 repetitions  
OBSERVE H1, 400.0359168 MHz  
DATA PROCESSING  
Line broadening 0.5 Hz  
FT size 65536  
Total time 0 min, 31 sec

11.140

8.076  
8.055  
7.288  
7.283  
7.268  
7.263  
7.242  
7.241  
7.223  
7.165  
7.161  
7.144  
7.140  
7.127  
7.123  
6.944  
6.935  
6.415  
6.406  
5.720

3.482  
3.413  
3.363  
3.354  
3.311  
3.201  
3.210  
3.183  
3.170  
3.140  
2.971  
2.834  
2.783  
2.519  
2.472  
2.467  
2.463  
2.417  
2.286  
2.050  
1.071  
1.054  
1.036

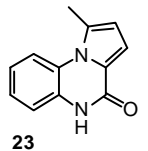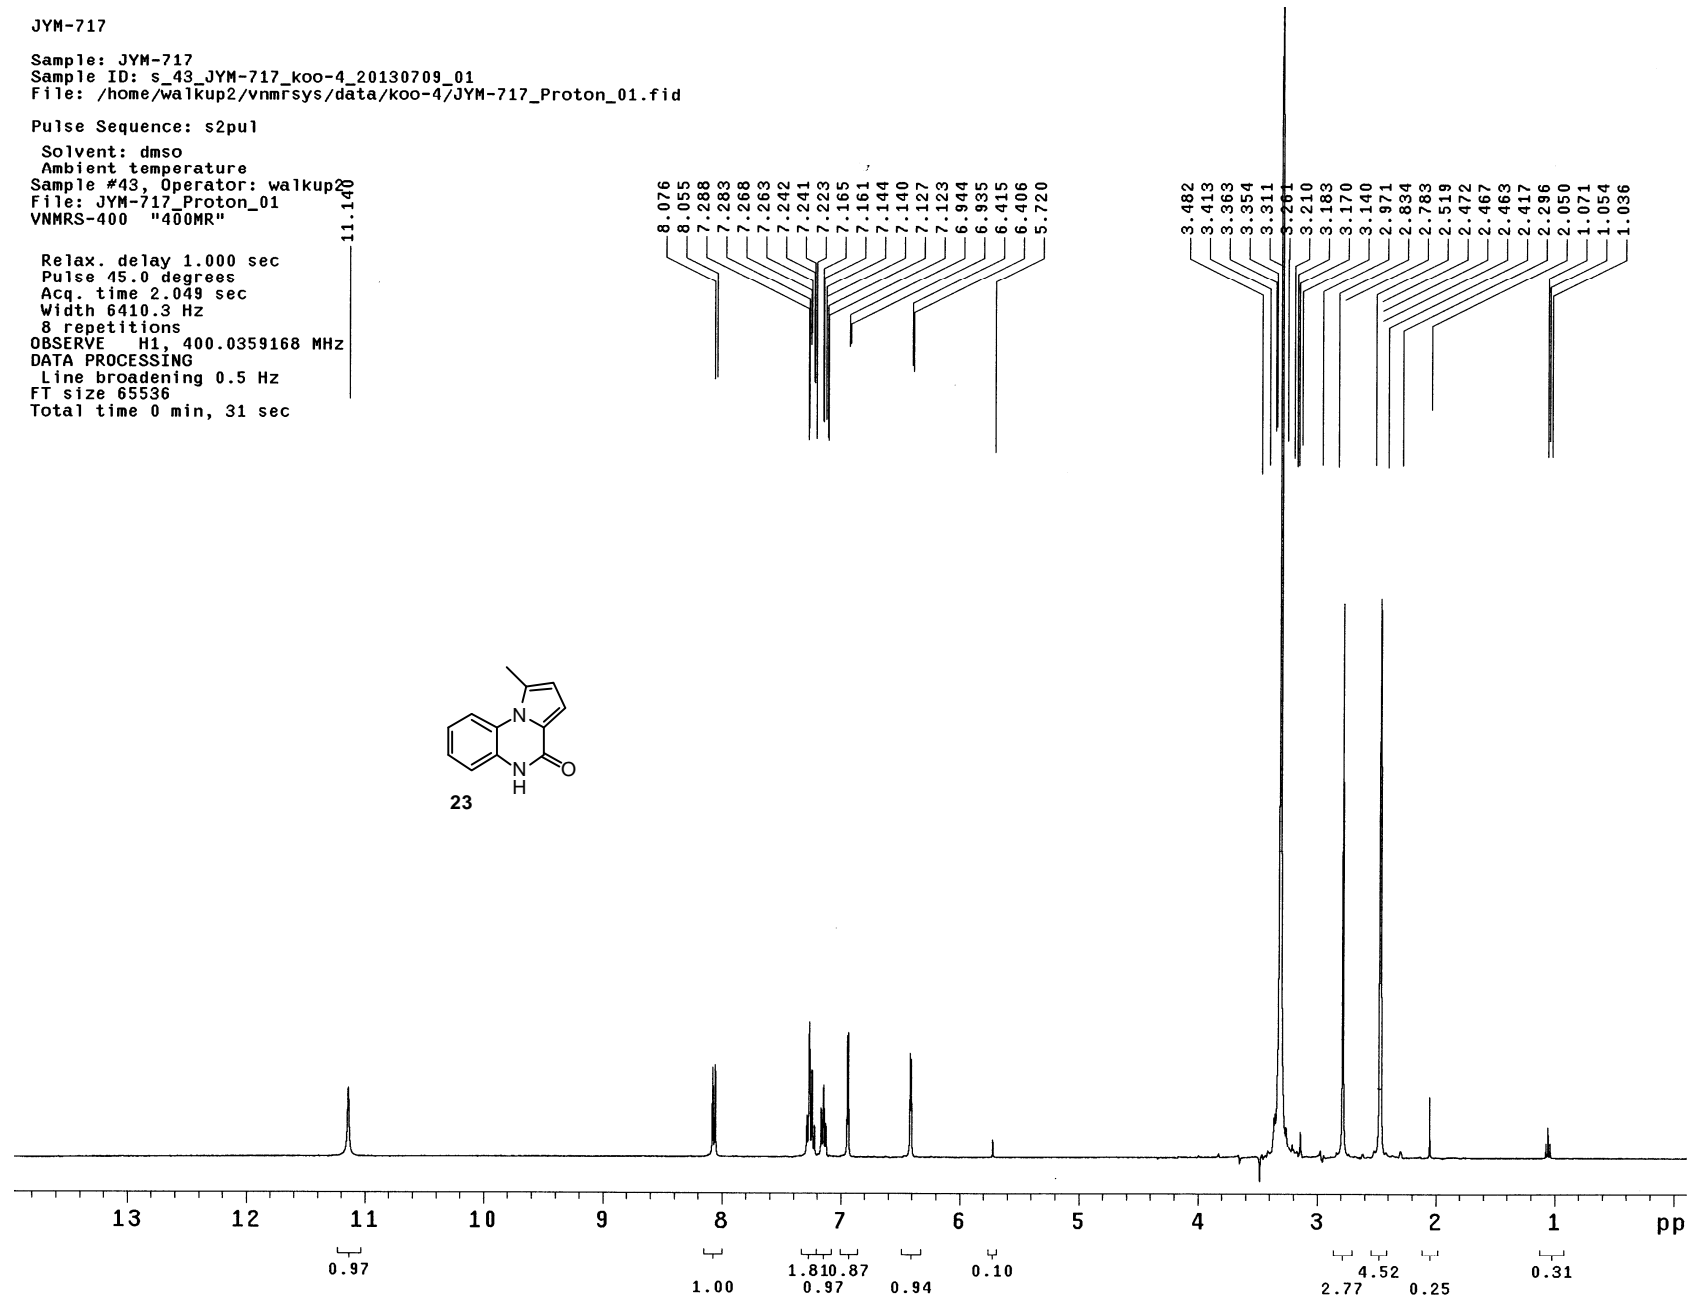

JYM-717-C

Sample: JYM-717-C  
Sample ID: s\_46\_JYM-717-C\_koo-4\_20130709\_01  
File: /home/walkup2/vnmrsys/data/koo-4/JYM-717-C\_Carbon\_01.fid

Pulse Sequence: s2pu1

Solvent: dmsd  
Ambient temperature  
Sample #46, Operator: walkup2  
File: JYM-717-C\_Carbon\_01  
VNMR-400 "400MR"

Relax. delay 1.000 sec  
Pulse 45.0 degrees  
Acq. time 1.300 sec  
Width 24509.8 Hz  
512 repetitions  
OBSERVE C13, 100.5891350 MHz  
DECOUPLE H1, 400.0379170 MHz  
Power 42 dB  
continuously on  
WALTZ-16 modulated  
DATA PROCESSING  
Line broadening 0.5 Hz  
FT size 65536  
Total time 19 min, 42 sec

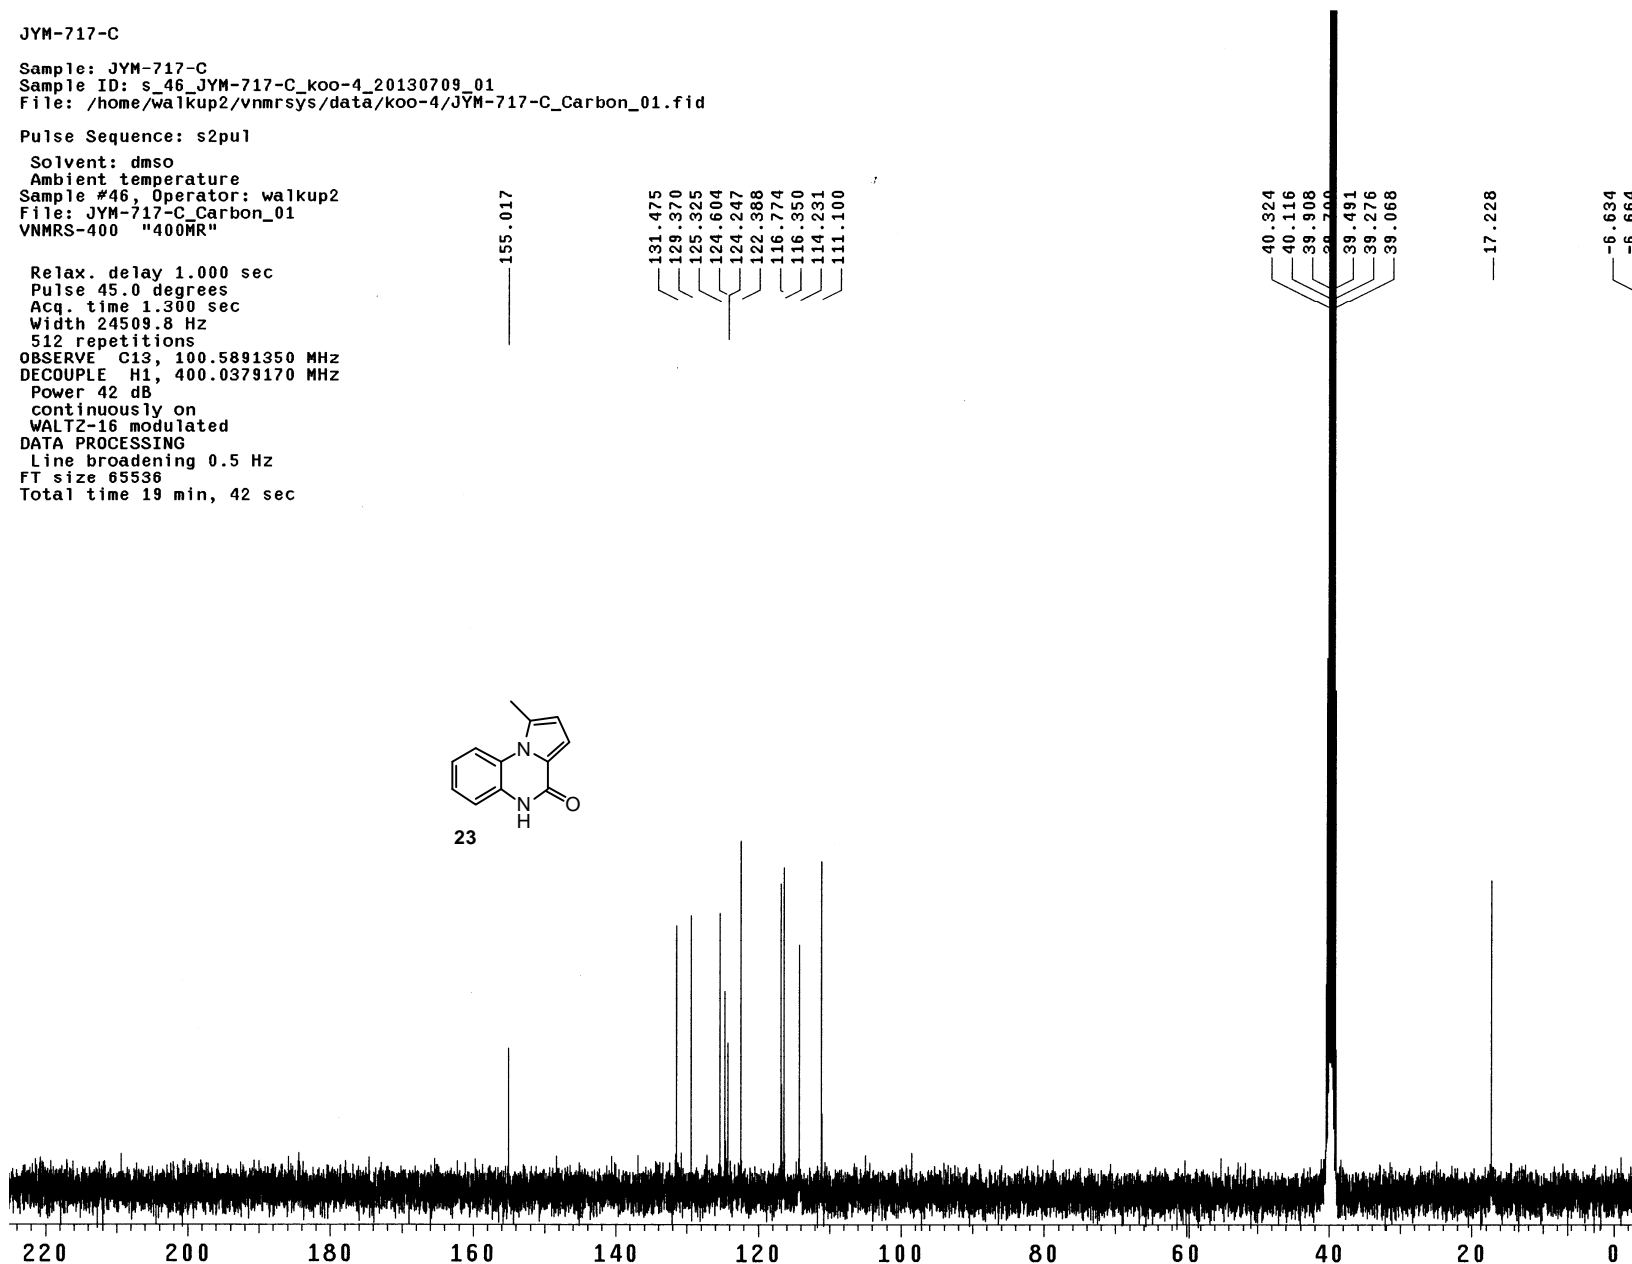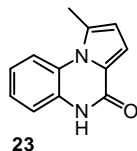

JYM-674

Sample: JYM-674

Sample ID: s\_40\_JYM-674\_koo-4\_20130614\_01

File: /home/walkup2/vnmr/sys/data/koo-4/JYM-674\_Proton\_01.fid

Pulse Sequence: s2pu1

Solvent: cdc13

Ambient temperature

Sample #40, Operator

File: JYM-674

VNMRS-400

400MHz

Relax. delay 1.000 sec

Pulse 45.0 degrees

Acq. time 2.049 sec

Width 6410.3 Hz

8 repetitions

OBSERVE H1, 400.0340080 MHz

DATA PROCESSING

Line broadening 0.5 Hz

FT size 65536

Total time 0 min, 31 sec

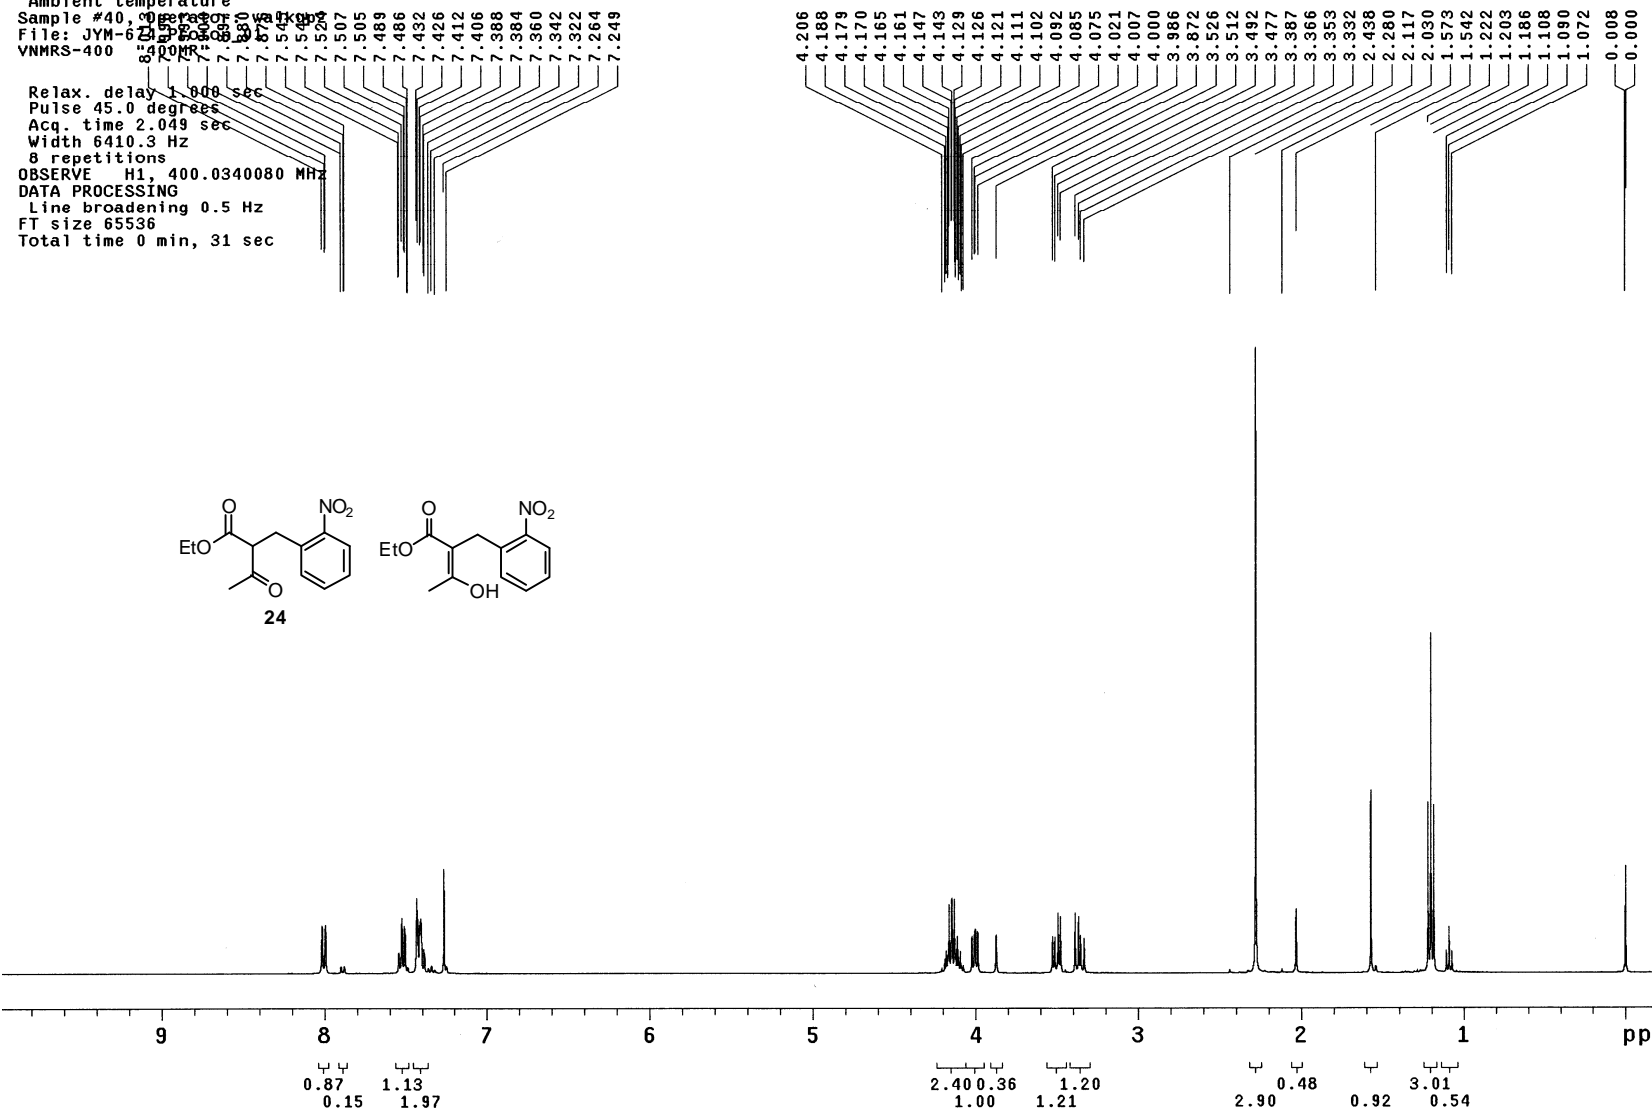

JYM-639-C

Sample: JYM-639-C

Sample ID: s\_34\_JYM-639-C\_koo-4\_20130718\_01

File: /home/walkup2/vnmrSYS/data/koo-4/JYM-639-C\_Carbon\_01.fid

Pulse Sequence: s2pu1

Solvent: cdc13  
Ambient temperature  
Sample #34, Operator: walkup2  
File: JYM-639-C\_Carbon\_01  
VNMR-400 "400MR"

Relax. delay 1.000 sec  
Pulse 45.0 degrees  
Acq. time 1.300 sec  
Width 24509.8 Hz  
128 repetitions  
OBSERVE C13, 100.5886384 MHz  
DECOUPLE H1, 400.0360169 MHz  
Power 42 dB  
continuously on  
WALTZ-16 modulated  
DATA PROCESSING  
Line broadening 0.5 Hz  
FT size 65536  
Total time 4 min, 56 sec

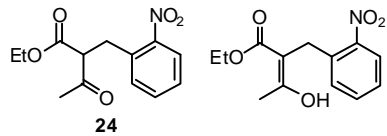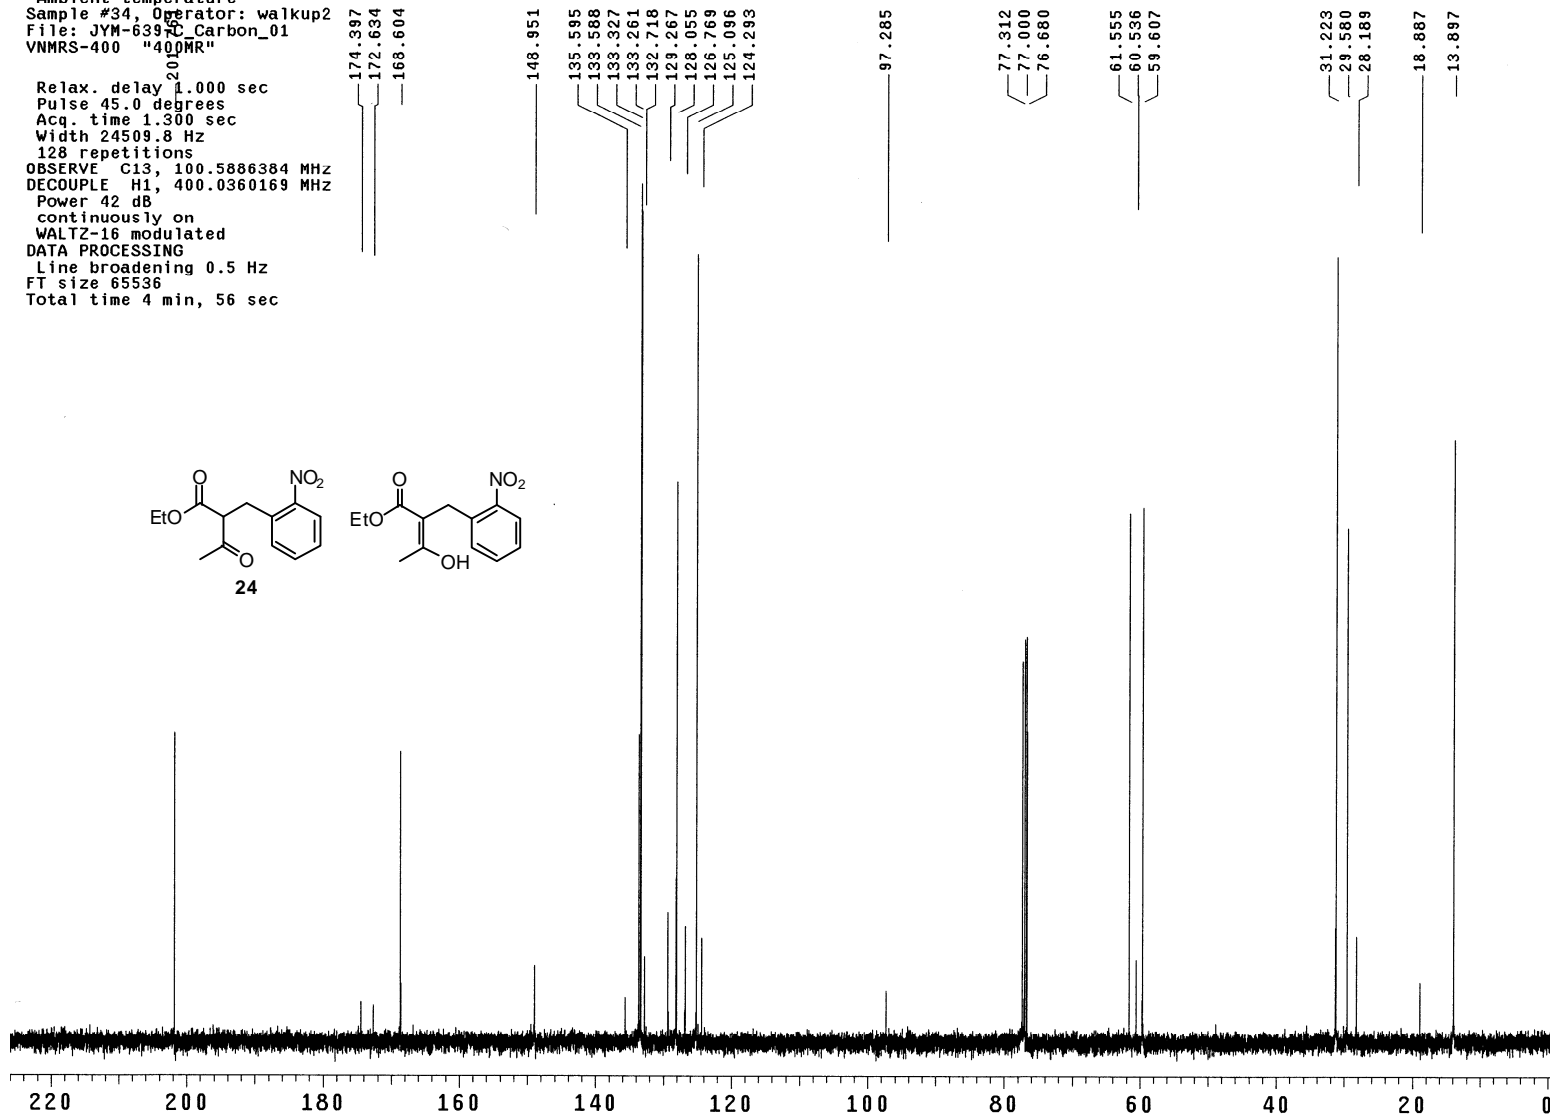

Sample: MD-310  
Sample ID: s\_42\_MD-310\_koo-4\_20140623\_01  
File: /home/walkup2/vnmrsys/data/koo-4/MD-310\_Proton\_01.fid

Pulse Sequence: s2pu1

Solvent: cdc13  
Ambient temperature  
Sample #42, Operator: walkup2  
File: MD-310\_Proton\_01  
VNMR-400 "400MR"

Relax. delay 1.000 sec  
Pulse 45.0 degrees  
Acq. time 2.049 sec  
Width 6830.6 Hz  
8 repetitions  
OBSERVE H1, 400.0340091 MHz  
DATA PROCESSING  
Line broadening 0.5 Hz  
FT size 65536  
Total time 0 min, 31 sec

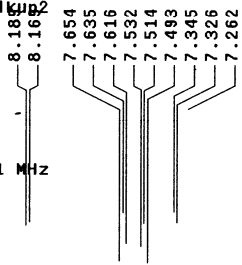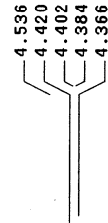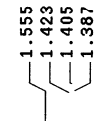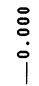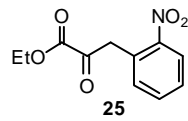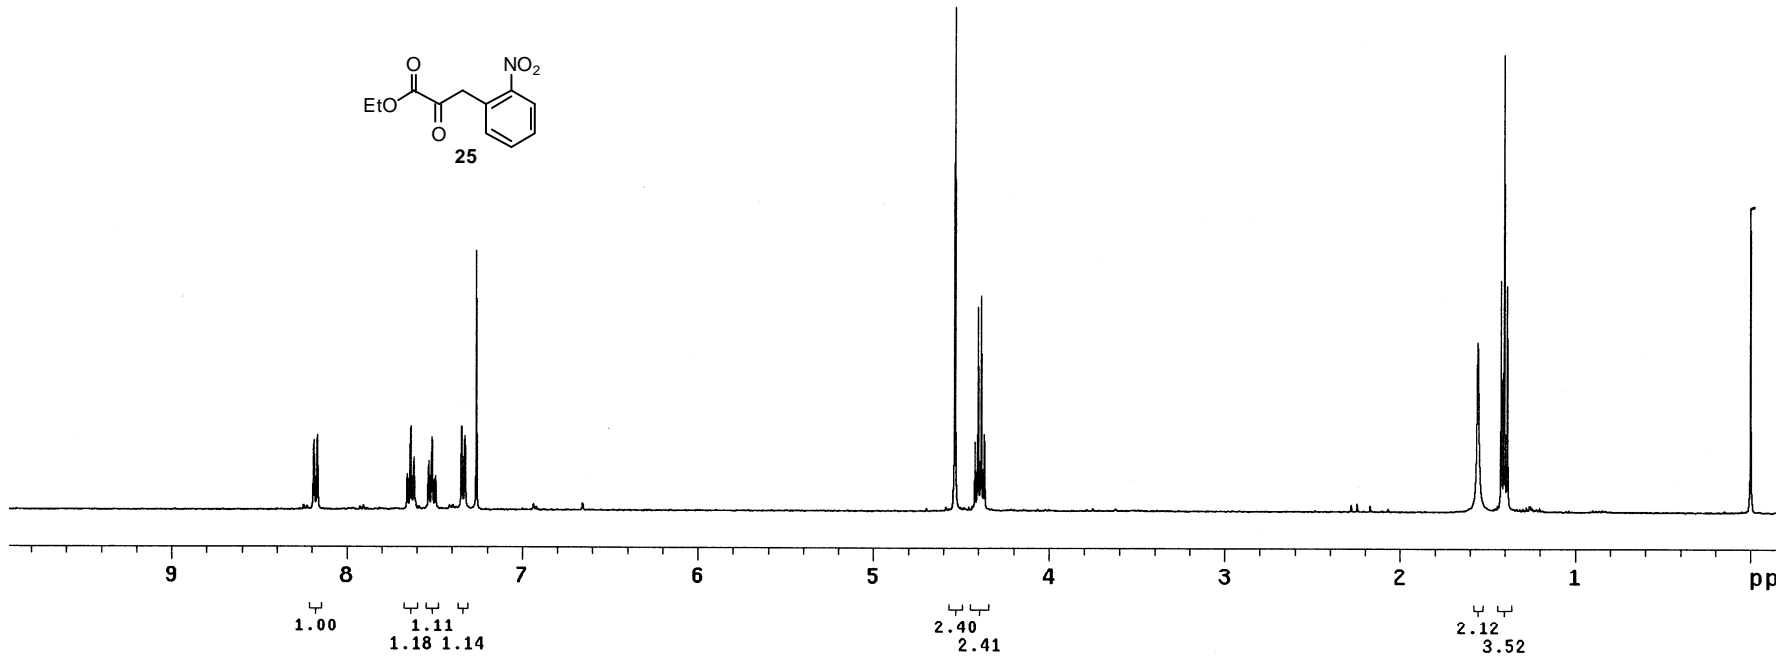

Sample: MD-310  
Sample ID: s\_49\_MD-310\_koo-4\_20140623\_01  
File: /home/walkup2/vnmrsys/data/koo-4/MD-310\_Carbon\_01.f1d

Pulse Sequence: s2pu1  
Solvent: cdc13  
Ambient temperature  
Sample #49, Operator: walkup2  
File: MD-310\_Carbon\_01  
VNMR5-400 "400MR"

Relax. delay 1.000 sec  
Pulse 45.0 degrees  
Acq. time 1.300 sec  
Width 24509.8 Hz  
256 repetitions  
OBSERVE C13, 100.5886345 MHz  
DECOUPLE H1, 400.0360169 MHz  
Power 42 dB  
continuously on  
WALTZ-16 modulated  
DATA PROCESSING  
Line broadening 0.5 Hz  
FT size 65536  
Total time 9 min, 51 sec

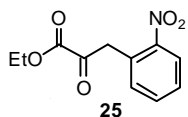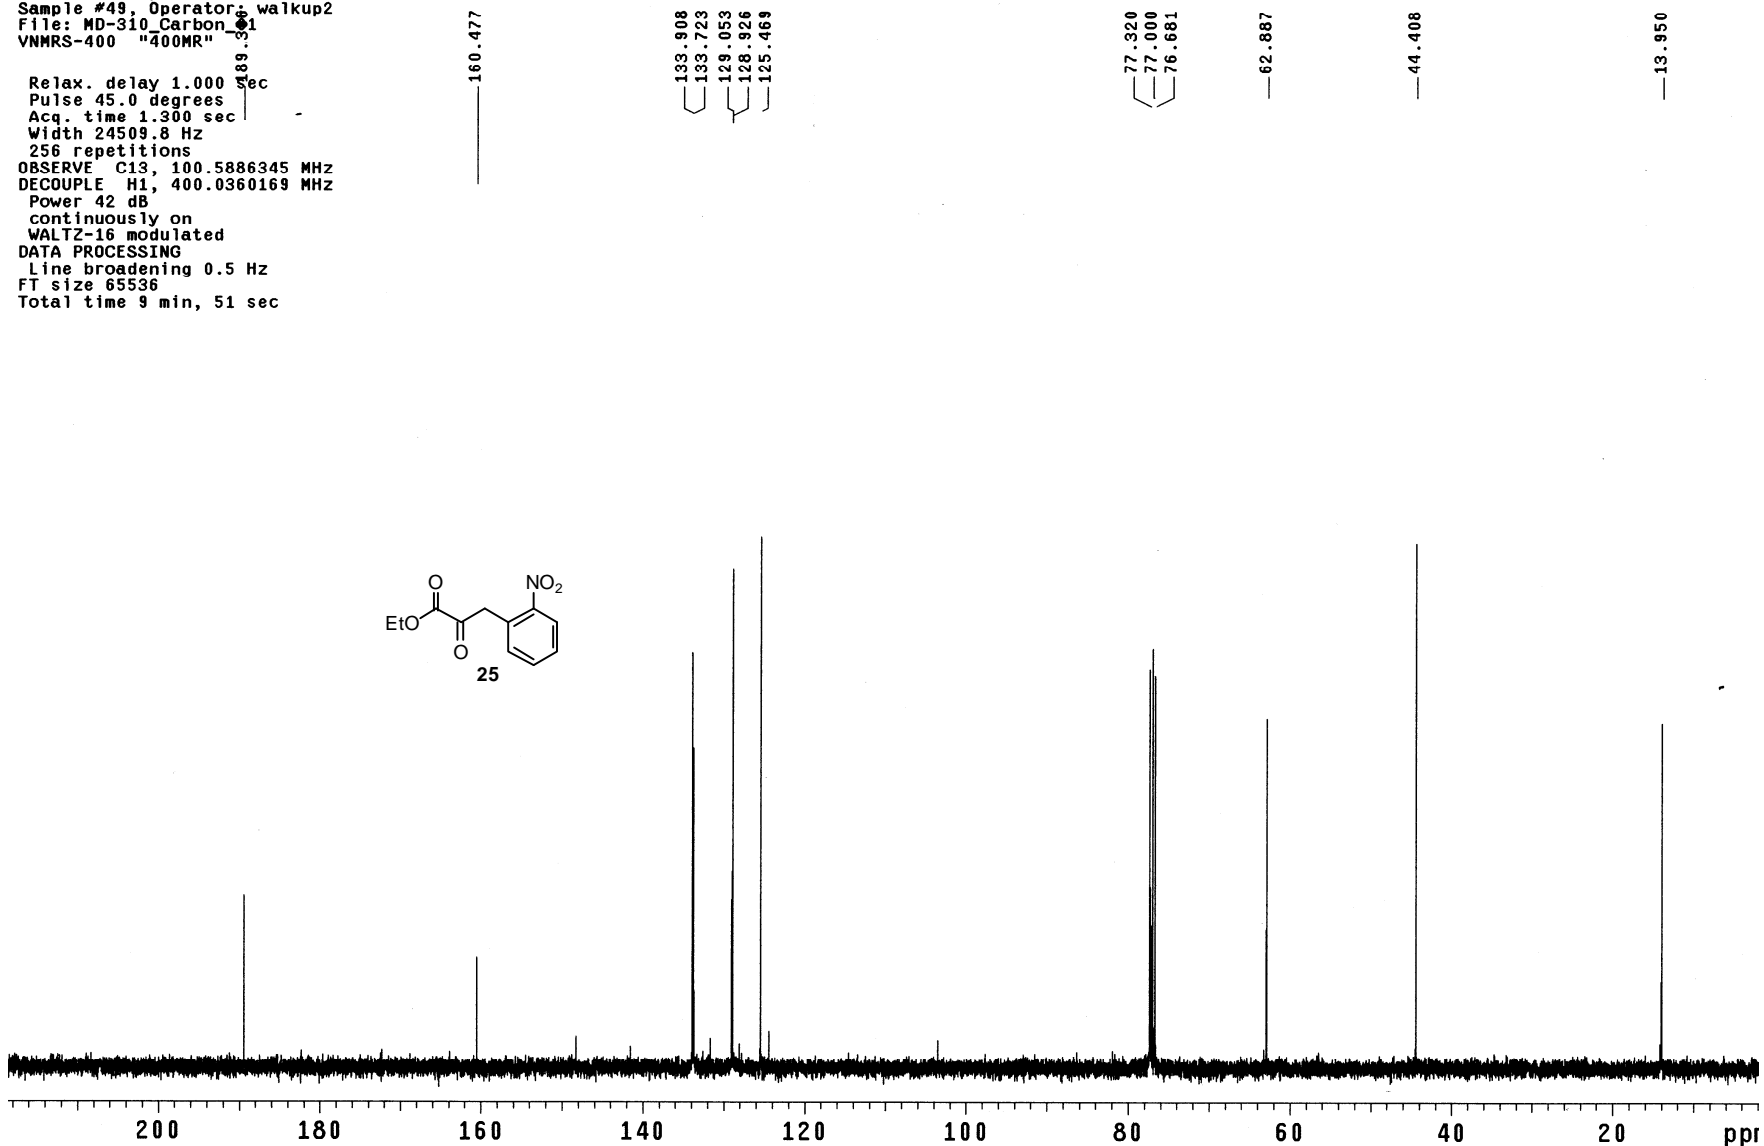



Sample: MD-305  
 Sample ID: s\_41\_MD-305\_koo-4\_20140613\_01  
 File: /home/walkup2/vnmrsys/data/koo-4/MD-305\_Proton\_02.fid

Pulse Sequence: s2pu1

Solvent: cdc13  
 Ambient temperature  
 Sample #41, Operator: walkup2  
 File: MD-305\_Proton\_02  
 VNMR5-400 "400MR"

Relax. delay 1.000 sec  
 Pulse 45.0 degrees  
 Acq. time 2.049 sec  
 Width 6830.6 Hz  
 8 repetitions  
 OBSERVE H1, 400.0340087 MHz  
 DATA PROCESSING  
 Line broadening 0.5 Hz  
 FT size 65536  
 Total time 0 min, 31 sec

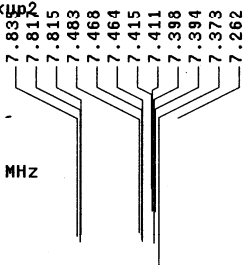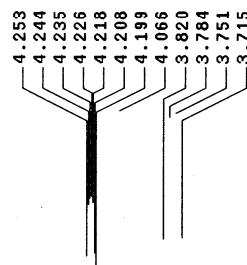

2.246

1.563  
 1.298  
 1.279  
 1.262

0.000

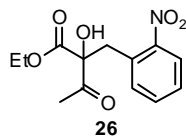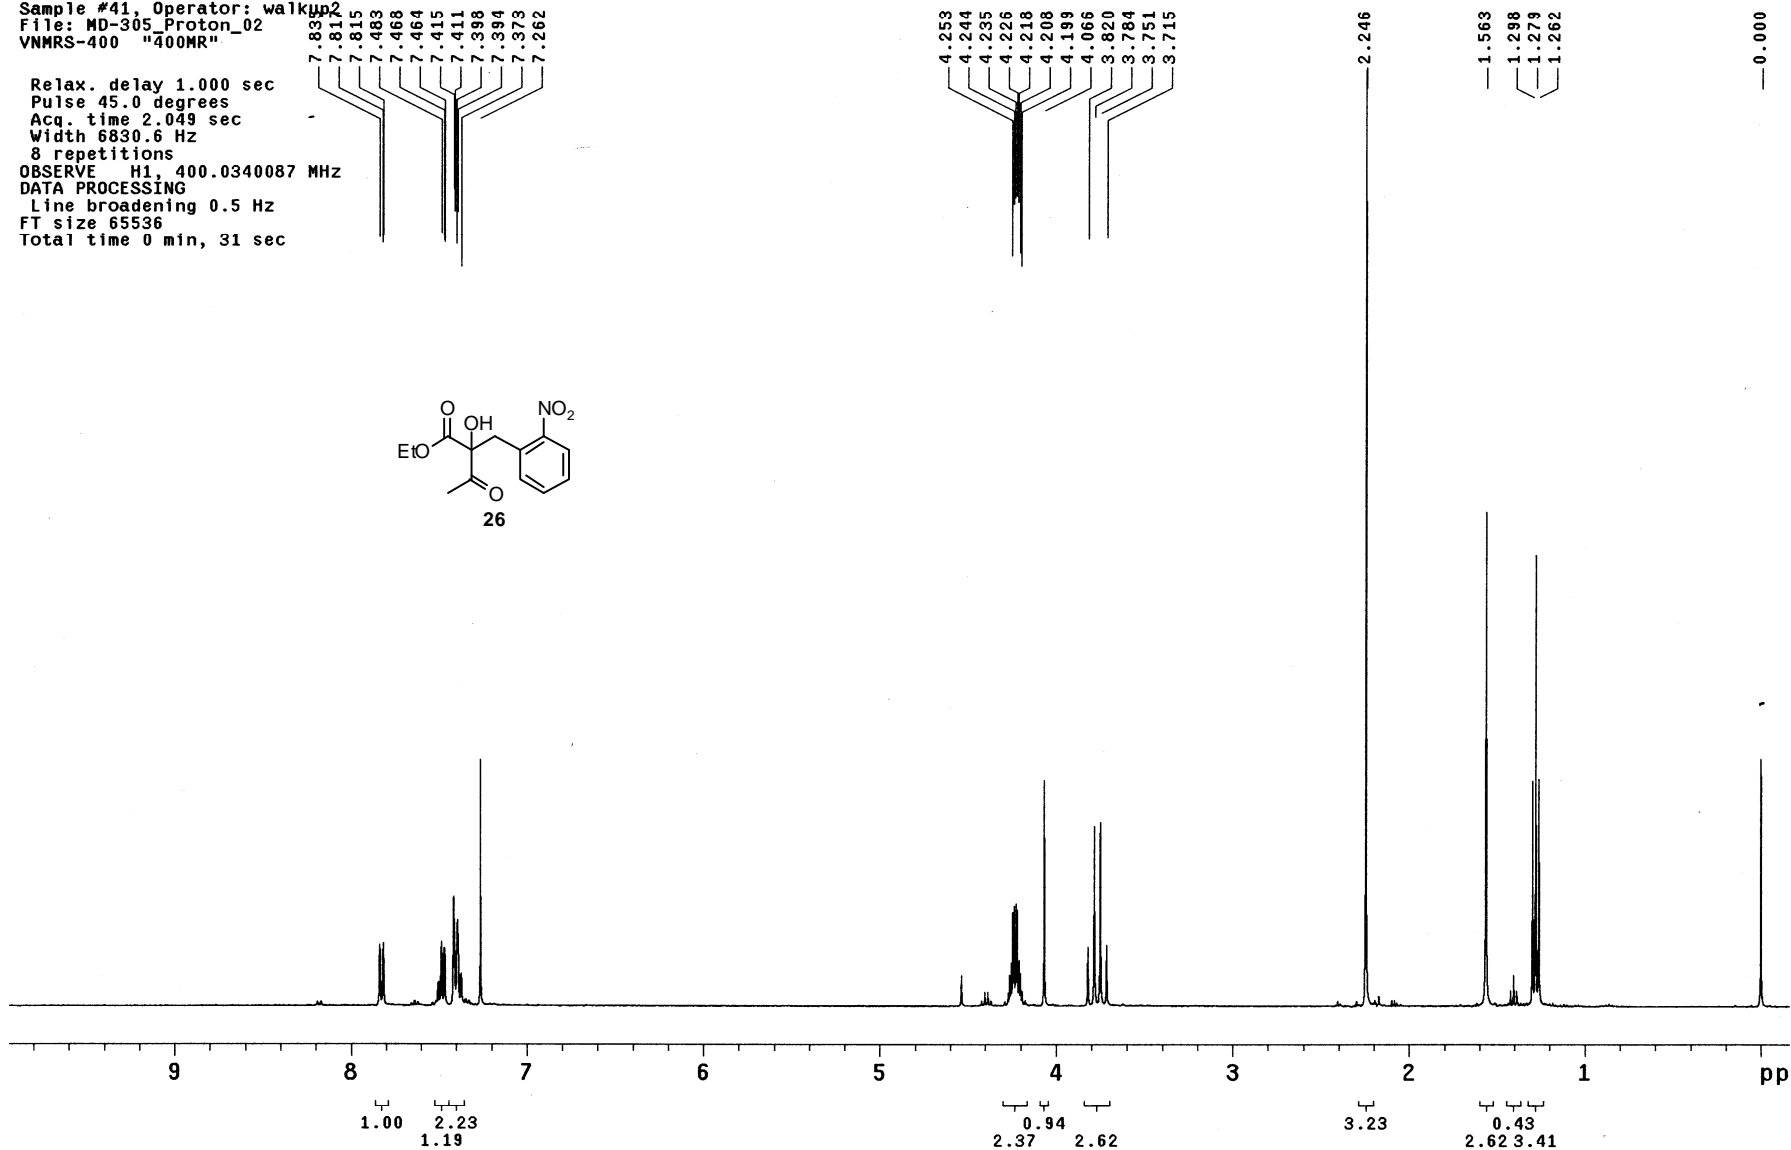

JYM-657-C

Sample: JYM-657-C  
Sample ID: s\_41\_JYM-657-C\_koo-4\_20130607\_01  
File: /home/walkup2/vnmrsys/data/koo-4/JYM-657-C\_Carbon\_01.fid

Pulse Sequence: s2pu1  
Solvent: cdc13  
Ambient temperature  
Sample #41, Operator: walkup2  
File: JYM-657-C\_Carbon\_01  
VNMR-400 "400MR"

Relax. delay 1.000 sec  
Pulse 45.0 degrees  
Acq. time 1.300 sec  
Width 24509.8 Hz  
128 repetitions  
OBSERVE C13, 100.5886368 MHz  
DECOUPLE H1, 400.0360169 MHz  
Power 42 dB  
continuously on  
WALTZ-16 modulated  
DATA PROCESSING  
Line broadening 0.5 Hz  
FT size 65536  
Total time 4 min, 56 sec

170.210

151.115

133.008  
132.198  
128.208  
128.115  
124.605

83.603  
77.320  
77.000  
76.680

63.280

35.551

24.747

13.861

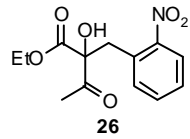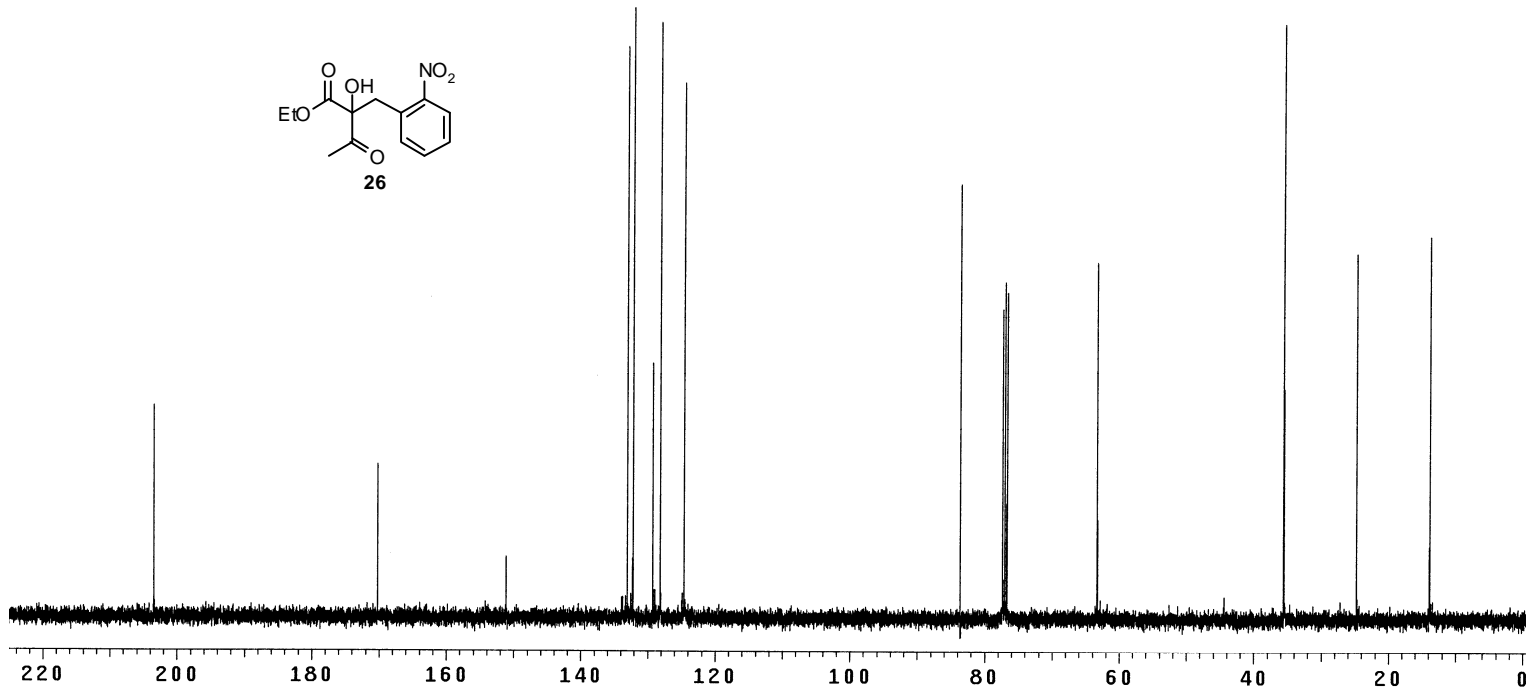

JYM-649-1

Sample: JYM-649-1  
Sample ID: s\_45\_JYM-649-1\_koo-4\_20130515\_02  
File: /home/walkup2/vnmrsys/data/koo-4/JYM-649-1\_Proton\_01.fid

Pulse Sequence: s2pu1

Solvent: cdcl3  
Ambient temperature  
Sample #45, Operator: walkup  
File: JYM-649-1\_Proton\_01  
VNMR-400 "400MR"

Relax. delay 1.000 sec  
Pulse 45.0 degrees  
Acq. time 2.049 sec  
Width 6410.3 Hz  
8 repetitions  
OBSERVE H1, 400.0340132 MHz  
DATA PROCESSING  
Line broadening 0.5 Hz  
FT size 65536  
Total time 0 min, 31 sec

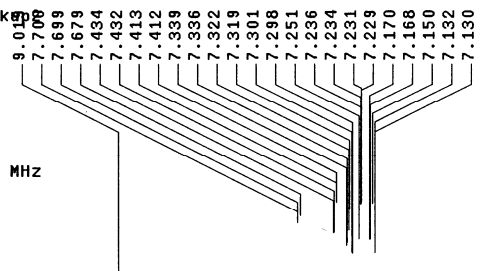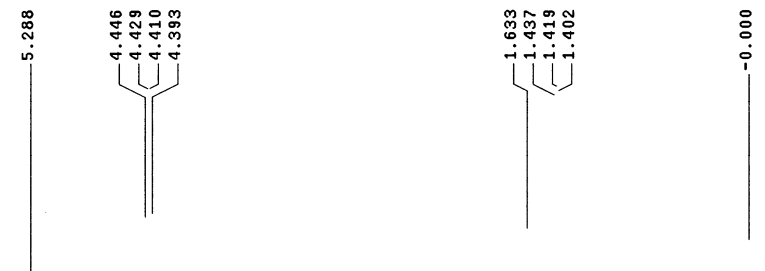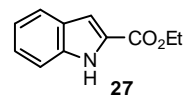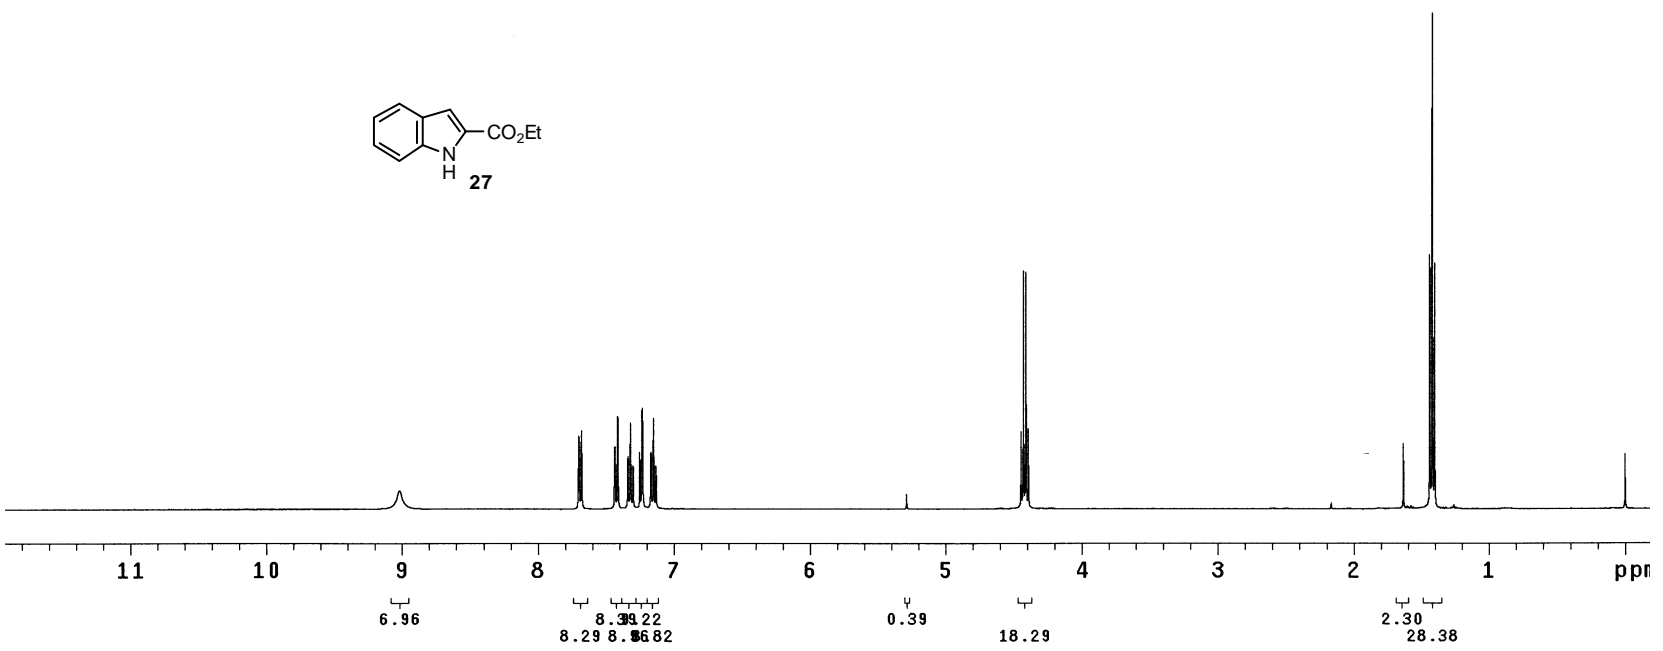

JYM-649-1-C

Sample: JYM-649-1-C

Sample ID: s\_46\_JYM-649-1-C\_Koo-4\_20130725\_01

File: /home/walkup2/vnmrsvs/data/Koo-4/JYM-649-1-C\_Carbon\_01.fid

Pulse Sequence: s2pu1

Solvent: cdc13  
Ambient temperature  
Sample #46, Operator: walkup2  
File: JYM-649-1-C\_Carbon\_01  
VNMR-400 "400MR"

Relax. delay 1.000 sec  
Pulse 45.0 degrees  
Acq. time 1.300 sec  
Width 24509.8 Hz  
128 repetitions  
OBSERVE C13, 100.5886383 MHz  
DECOUPLE H1, 400.0360169 MHz  
Power 42 dB  
continuously on  
WALTZ-16 modulated  
DATA PROCESSING  
Line broadening 0.5 Hz  
FT size 65536  
Total time 4 min, 56 sec

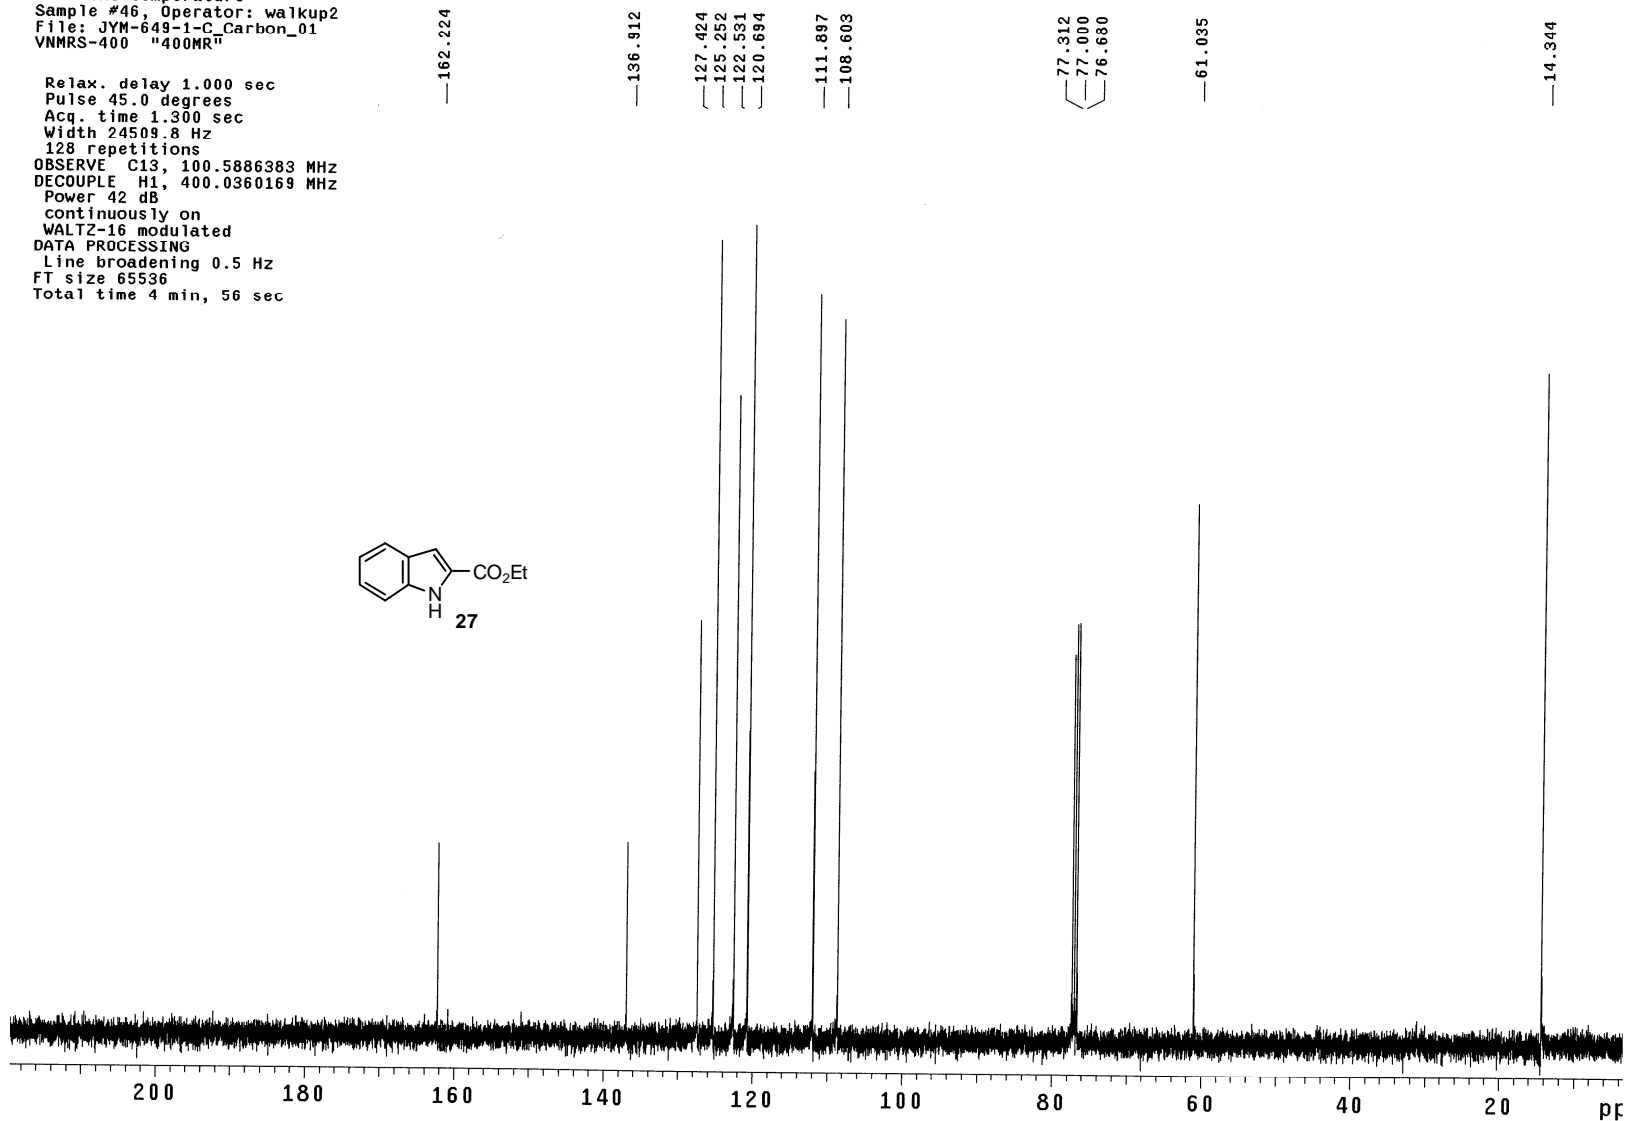

JYM-715

Sample: JYM-715  
Sample ID: s\_46\_JYM-715\_koo-4\_20130709\_01  
File: /home/walkup2/vnmr/5ys/data/koo-4/JYM-715\_Proton\_01.fid

Pulse Sequence: s2pu1  
Solvent: cdc13  
Ambient temperature  
Sample #46, Operator: walkup2  
File: JYM-715\_Proton\_01  
VNMR5-400 "400MR"  
Relax. delay 1.000 sec  
Pulse 45.0 degrees  
Acq. time 2.049 sec  
Width 6410.3 Hz  
8 repetitions  
OBSERVE H1, 400.0340072 MHz  
DATA PROCESSING  
Line broadening 0.5 Hz  
FT size 65536  
Total time 0 min, 31 sec

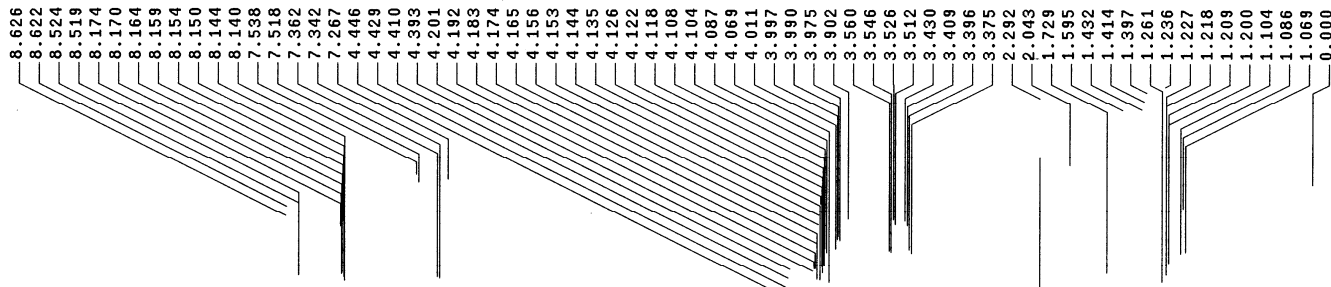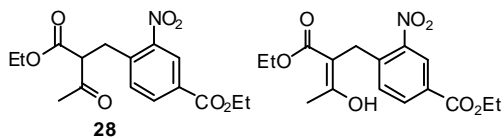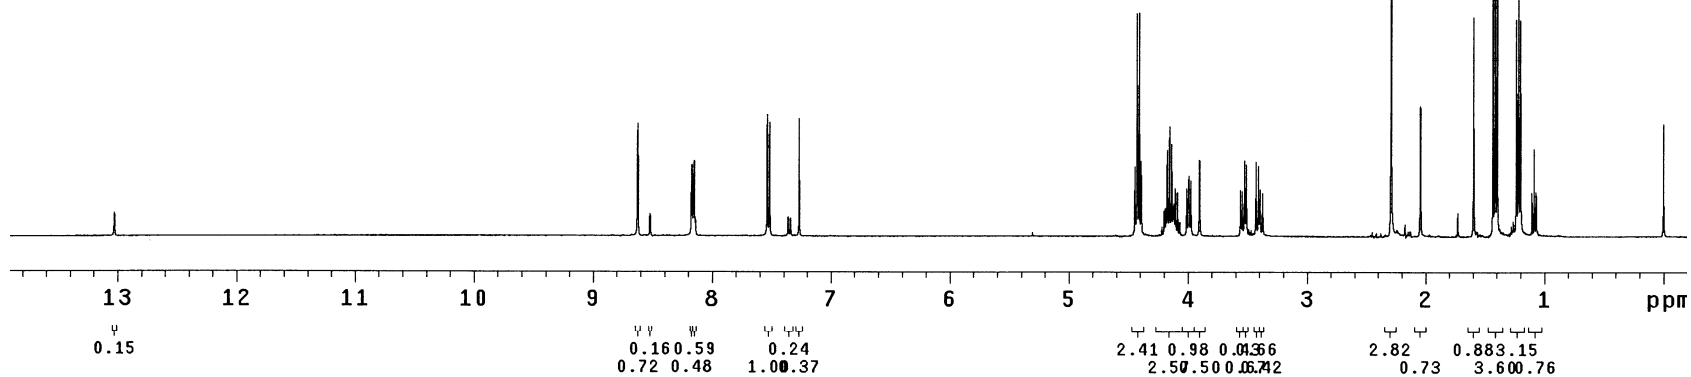

JYM-715-C

Sample: JYM-715-C  
Sample ID: s\_46\_JYM-715-C\_koo-4\_20130726\_01  
File: /home/walkup2/vnmrsys/data/koo-4/JYM-715-C\_Carbon\_01.fid

Pulse Sequence: s2pu1

Solvent: cdc13  
Ambient temperature  
Sample #467 Operator: walkup2  
File: JYM-715-C\_Carbon\_01  
VNMR-400 400MR"

Relax. delay 1.000 sec  
Pulse 45.0 degrees  
Acq. time 1.300 sec  
Width 24509.6 Hz  
128 repetitions  
OBSERVE C13, 100.5886377 MHz  
DECOUPLE H1, 400.0360169 MHz  
Power 42 dB  
continuously on  
WALTZ-16 modulated  
DATA PROCESSING  
Line broadening 0.5 Hz  
FT size 65536  
Total time 4 min, 56 sec

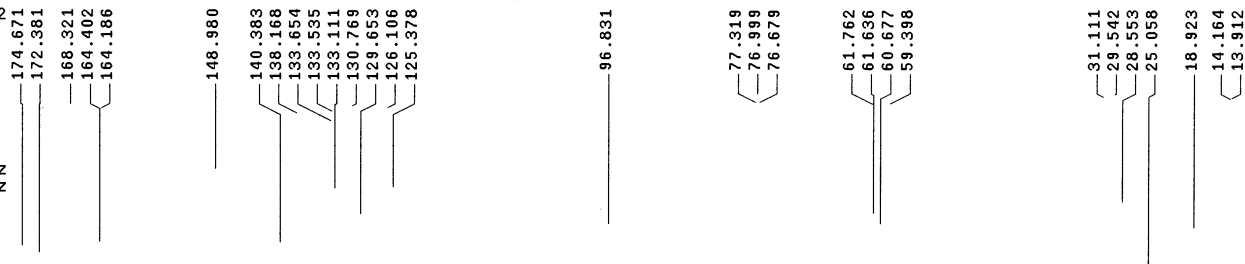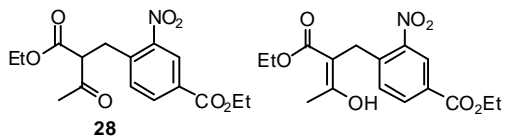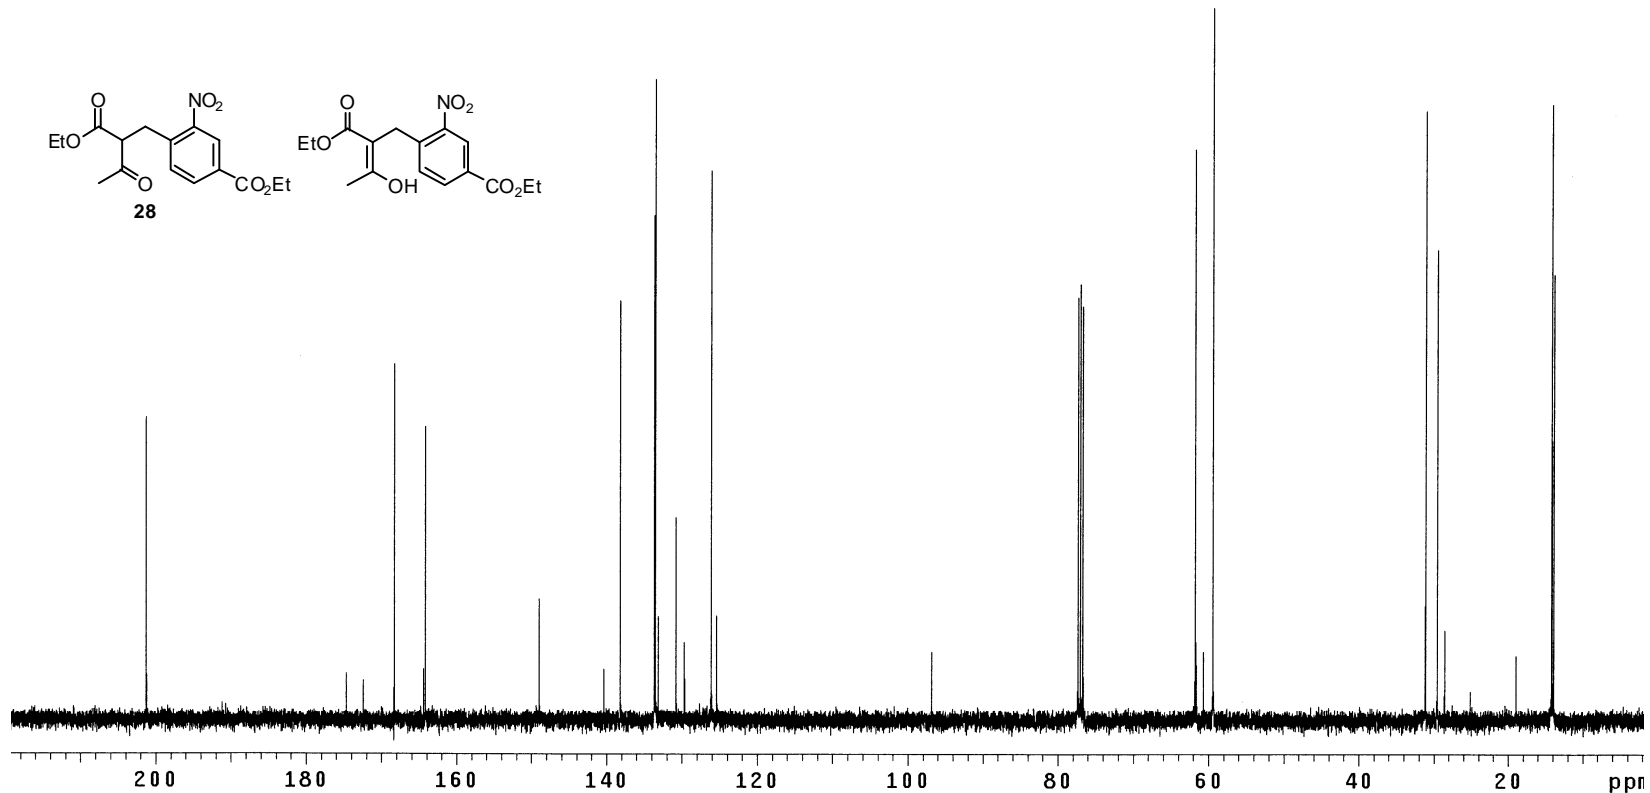

JYM-718

Sample: JYM-718  
Sample ID: s\_42\_JYM-718\_koo-4\_20130710\_01  
File: /home/walkup2/vnmrsys/data/koo-4/JYM-718\_Proton\_01.fid

Pulse Sequence: s2pu1

Solvent: cdc13  
Ambient temperature  
Sample #42, Operator: walkup2  
File: JYM-718\_Proton\_01  
VNMR-400 "400MR"

Relax. delay 1.000 sec  
Pulse 45.0 degrees  
Acq. time 2.049 sec  
Width 6410.3 Hz  
8 repetitions  
OBSERVE H1, 400.0340082 MHz  
DATA PROCESSING  
Line broadening 0.5 Hz  
FT size 65536  
Total time 0 min, 31 sec

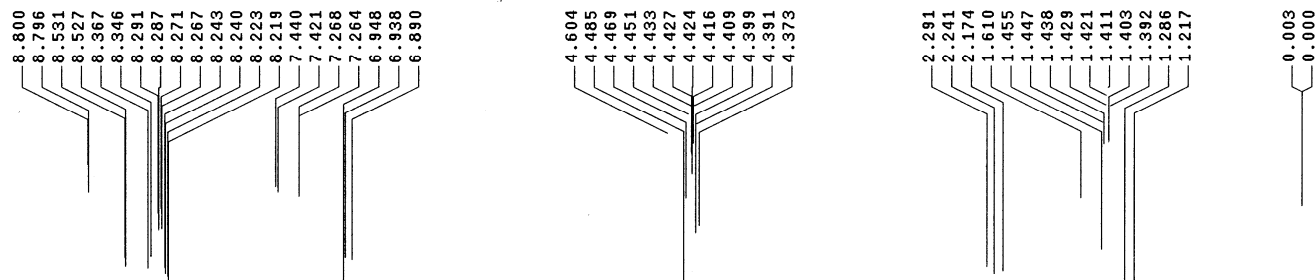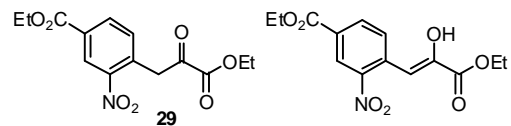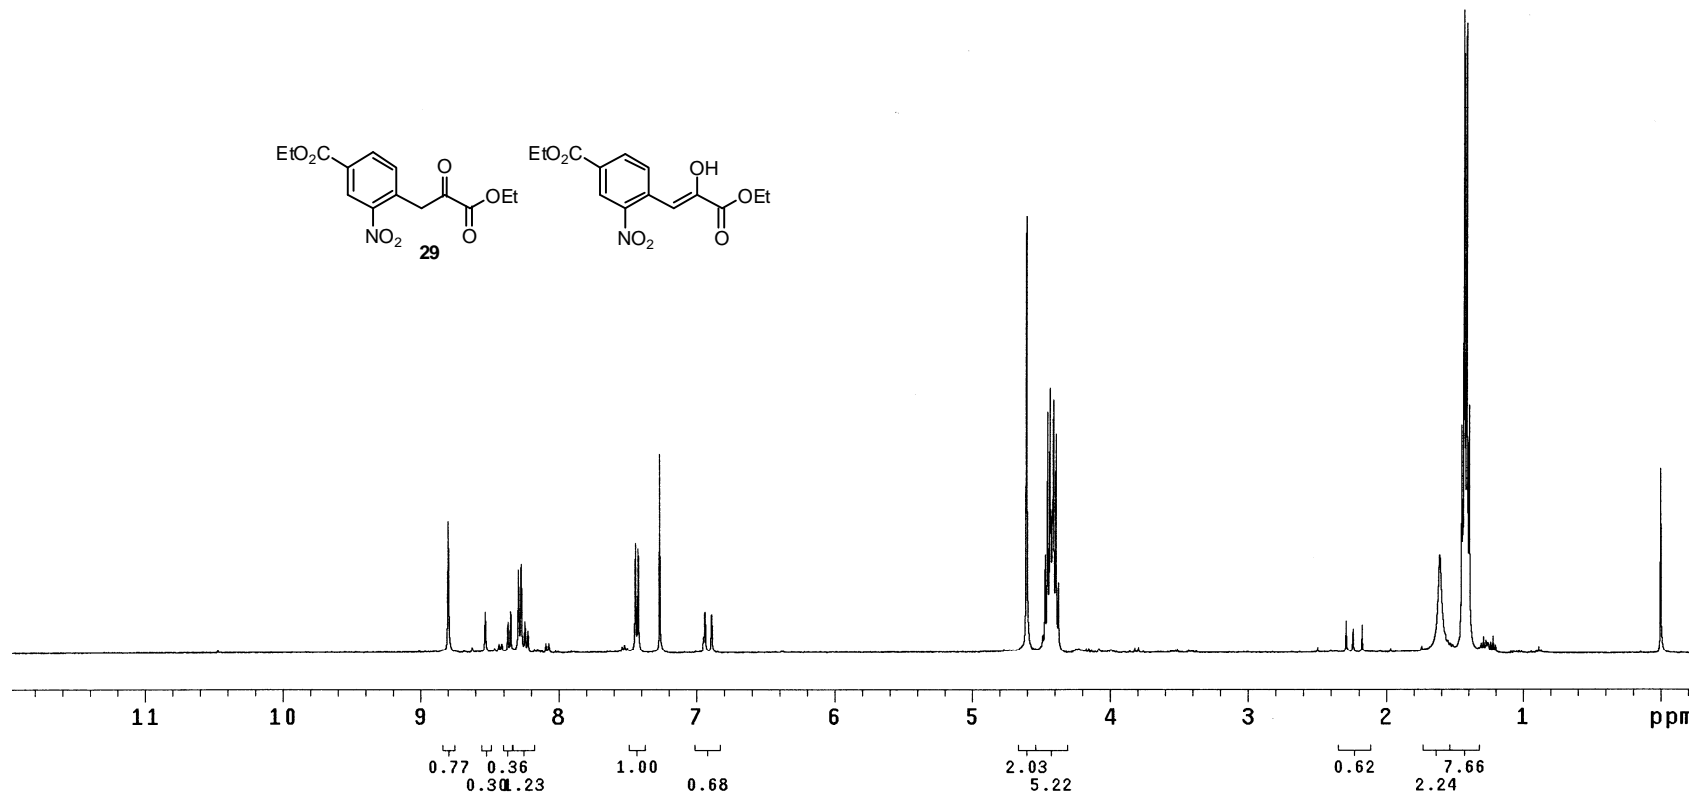

JYM-723-C

Sample: JYM-723-C  
Sample ID: s\_49\_JYM-723-C\_koo-4\_20130717\_01  
File: /home/walkup2/vnmrsys/data/koo-4/JYM-723-C\_Carbon\_01.fid

Pulse Sequence: s2pu1

Solvent: cdc13  
Ambient temperature  
Sample #49, Operator: walkup2  
File: JYM-723-C\_Carbon\_01  
VNMRS-400 "400MR"

Relax. delay 1.000 sec  
Pulse 45.0 degrees  
Acq. time 1.300 sec  
Width 24509.8 Hz  
128 repetitions  
OBSERVE C13, 100.5886355 MHz  
DECOUPLE H1, 400.0360169 MHz  
Power 42 dB  
continuously on  
WALTZ-16 modulated  
DATA PROCESSING  
Line broadening 0.5 Hz  
FT size 65536  
Total time 4 min, 56 sec

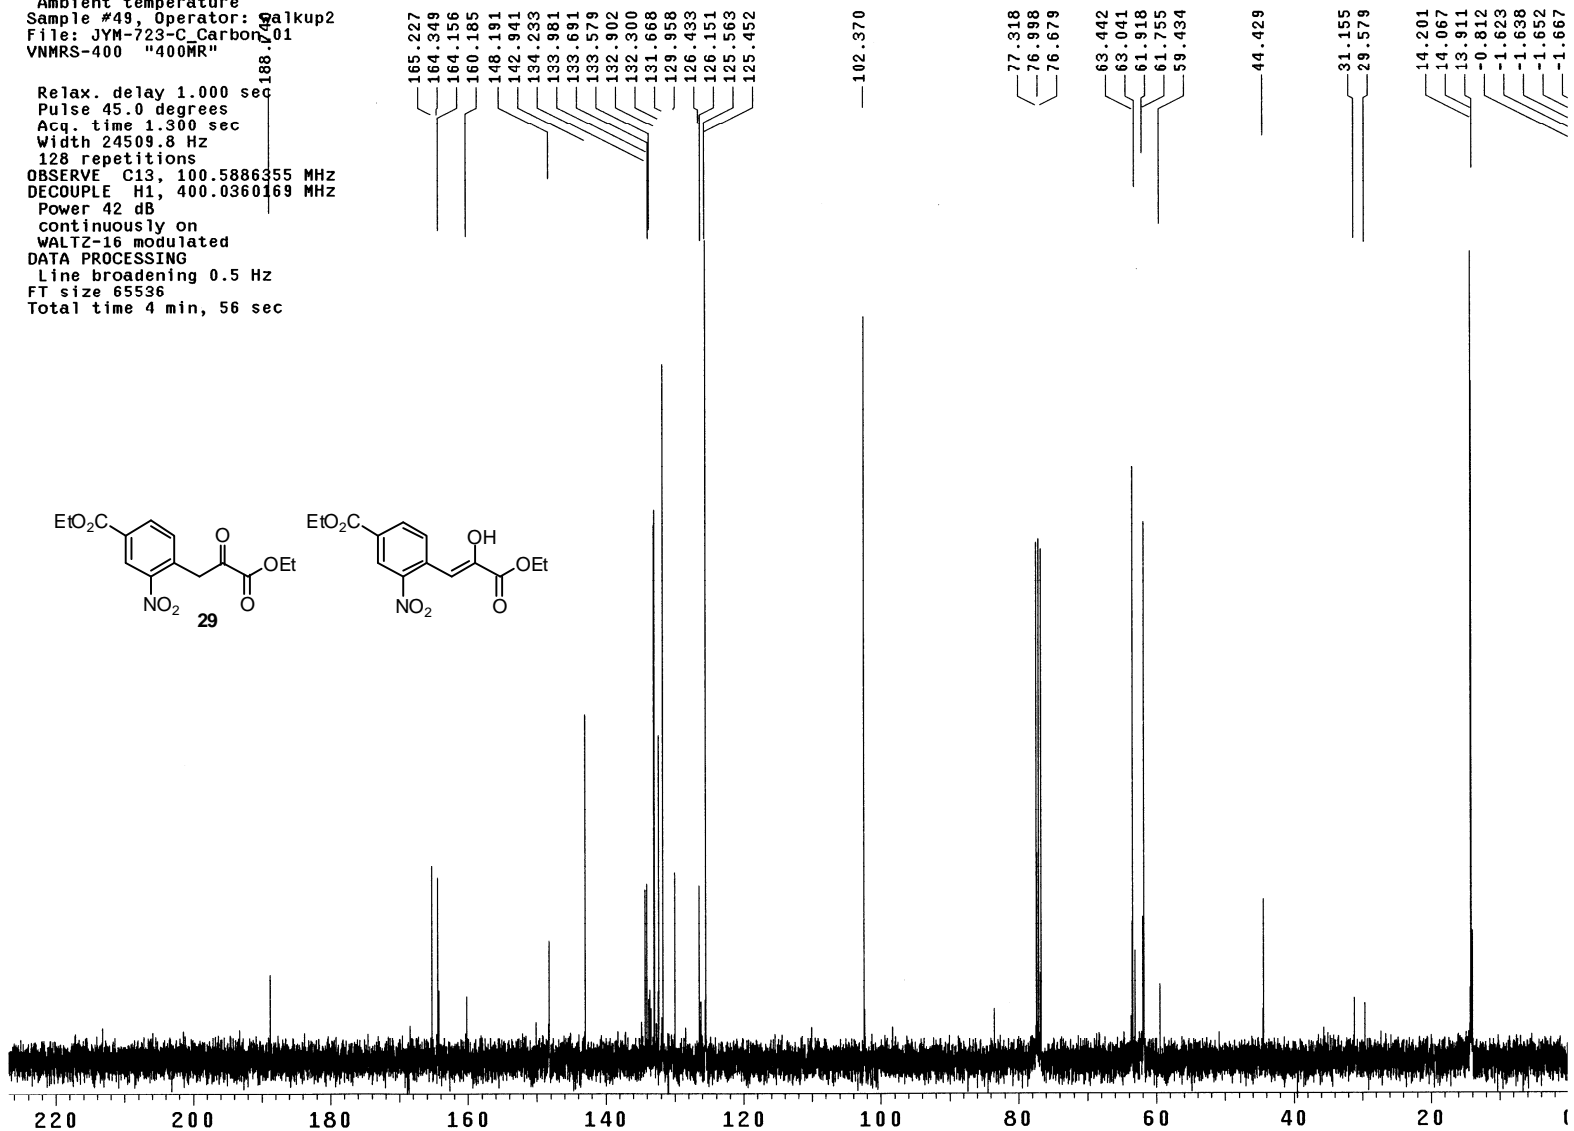



JYM-722

Sample: JYM-722  
Sample ID: s\_46\_JYM-722\_koo-4\_20130711\_01  
File: /home/walkup2/vnmrsys/data/koo-4/JYM-722\_Proton\_01.fid

Pulse Sequence: s2pu1  
Solvent: cdc13  
Ambient temperature  
Sample #46, Operator: walkup2  
File: JYM-722\_Proton\_01  
VNMR5-400 "400MR"

Relax. delay 1.000 sec  
Pulse 45.0 degrees  
Acq. time 2.049 sec  
Width 6410.3 Hz  
8 repetitions  
OBSERVE H1, 400.0340093 MHz  
DATA PROCESSING  
Line broadening 0.5 Hz  
FT size 65536  
Total time 0 min, 31 sec

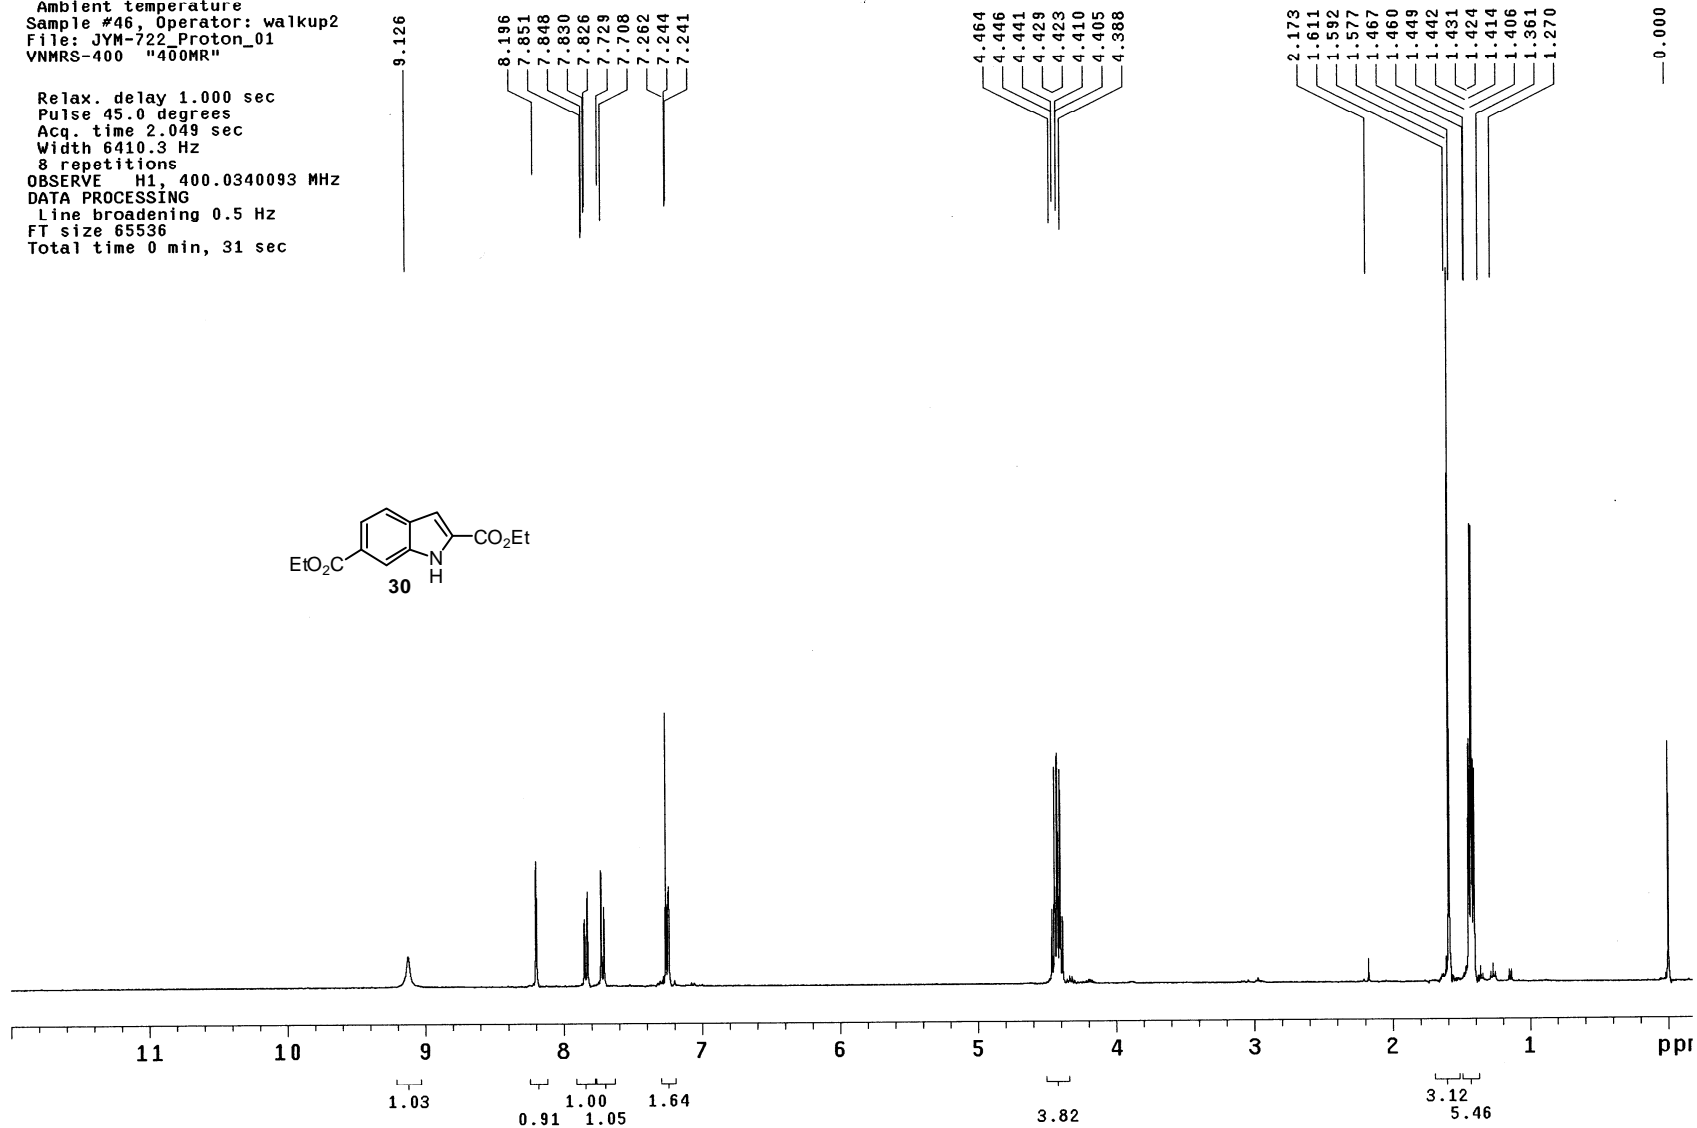

Sample: MD-317-C  
Sample ID: s\_47\_MD-317-C\_koo-4\_20140627\_01  
File: /home/walkup2/vnmrsys/data/koo-4/MD-317-C\_Carbon\_01.fid

Pulse Sequence: s2pu1  
Solvent: cdcl3  
Ambient temperature  
Sample #47, Operator: walkup2  
File: MD-317-C\_Carbon\_01  
VNMR-400 "400MR"

Relax. delay 1.000 sec  
Pulse 45.0 degrees  
Acq. time 1.300 sec  
Width 24509.8 Hz  
512 repetitions  
OBSERVE C13, 100.5886351 MHz  
DECOUPLE H1, 400.0360169 MHz  
Power 42 dB  
continuously on  
WALTZ-16 modulated  
DATA PROCESSING  
Line broadening 0.5 Hz  
FT size 65536  
Total time 19 min, 42 sec

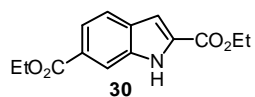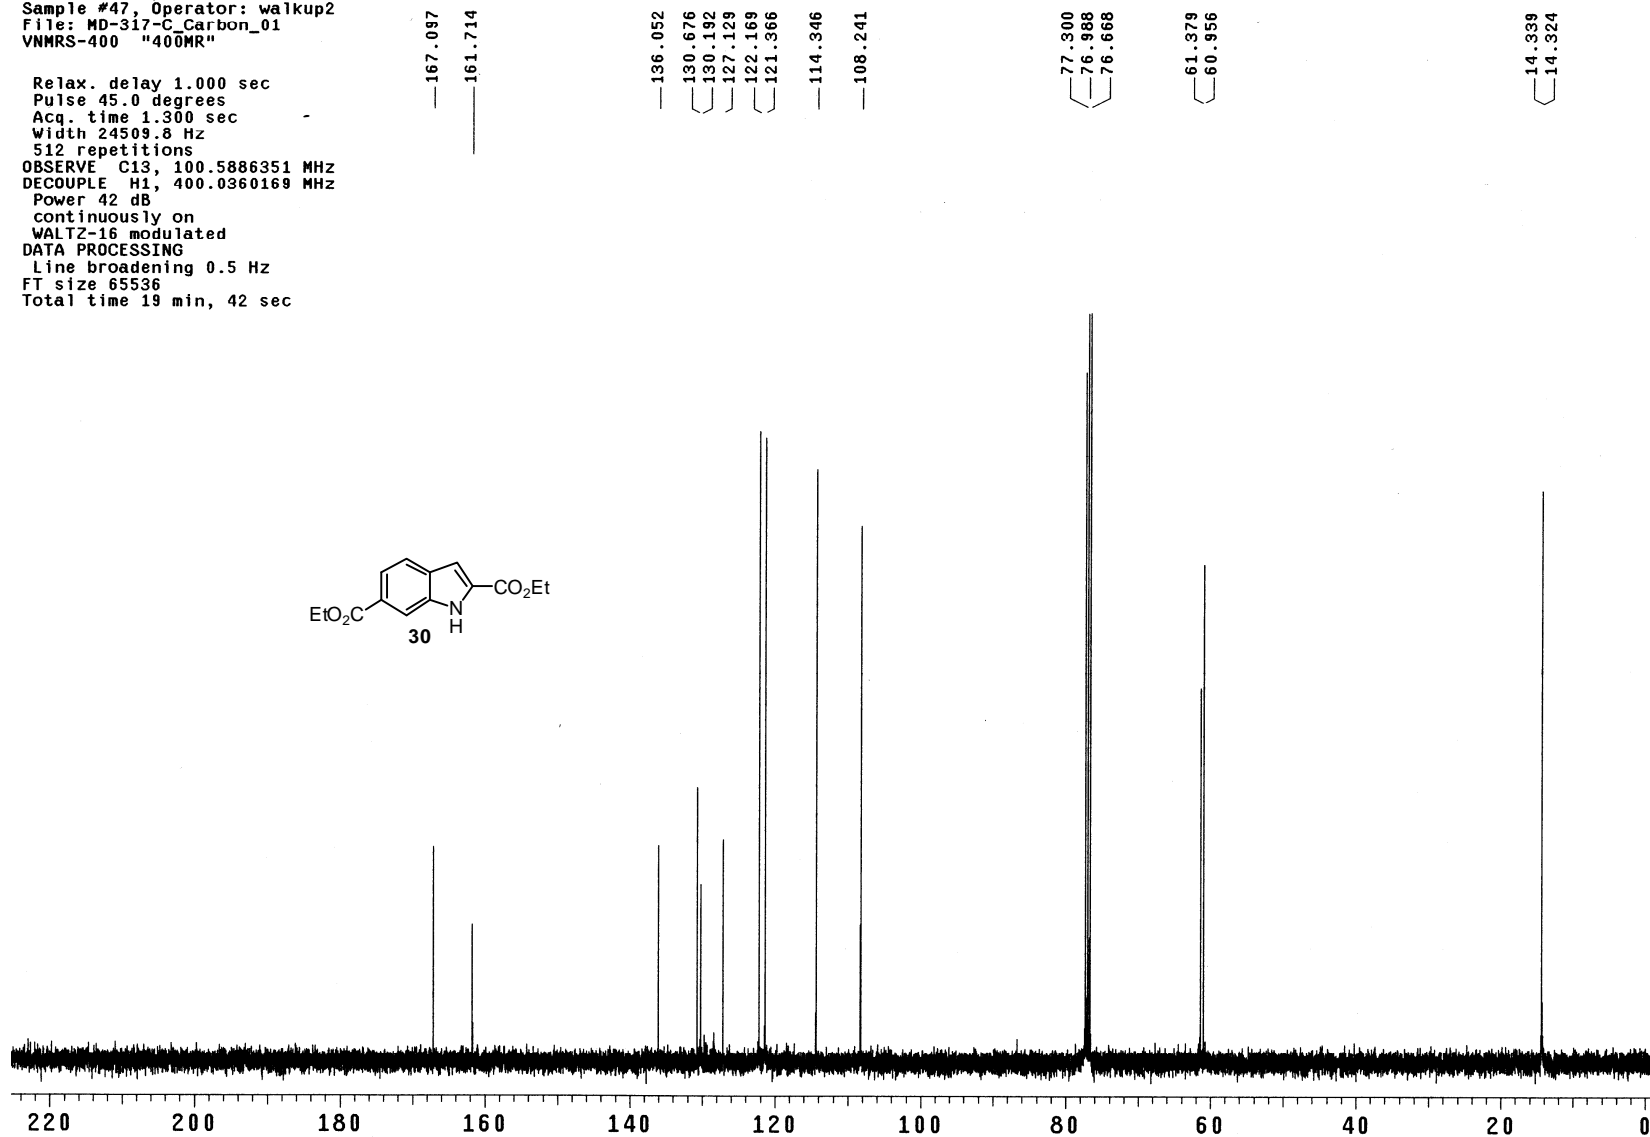

JYM-772-1

Sample: JYM-772-1  
Sample ID: s\_49\_JYM-772-1\_koo-4\_20130808\_01  
File: /home/walkup2/vnmrsys/data/koo-4/JYM-772-1\_Proton\_01.fid

Pulse Sequence: s2pul

Solvent: cdc13  
Ambient temperature  
Sample #49, Operator: walkup2  
File: JYM-772-1\_Proton\_01  
VNMRS-400 "400MR"

Relax. delay 1.000 sec  
Pulse 45.0 degrees  
Acq. time 2.049 sec  
Width 6410.3 Hz  
8 repetitions  
OBSERVE H1, 400.0340078 MHz  
DATA PROCESSING  
Line broadening 0.5 Hz  
FT size 65536  
Total time 0 min, 31 sec

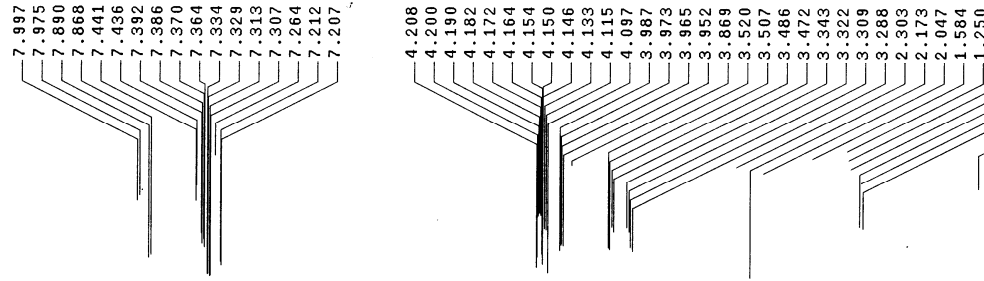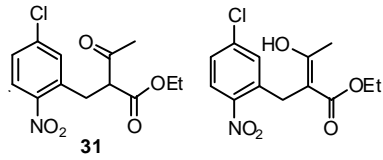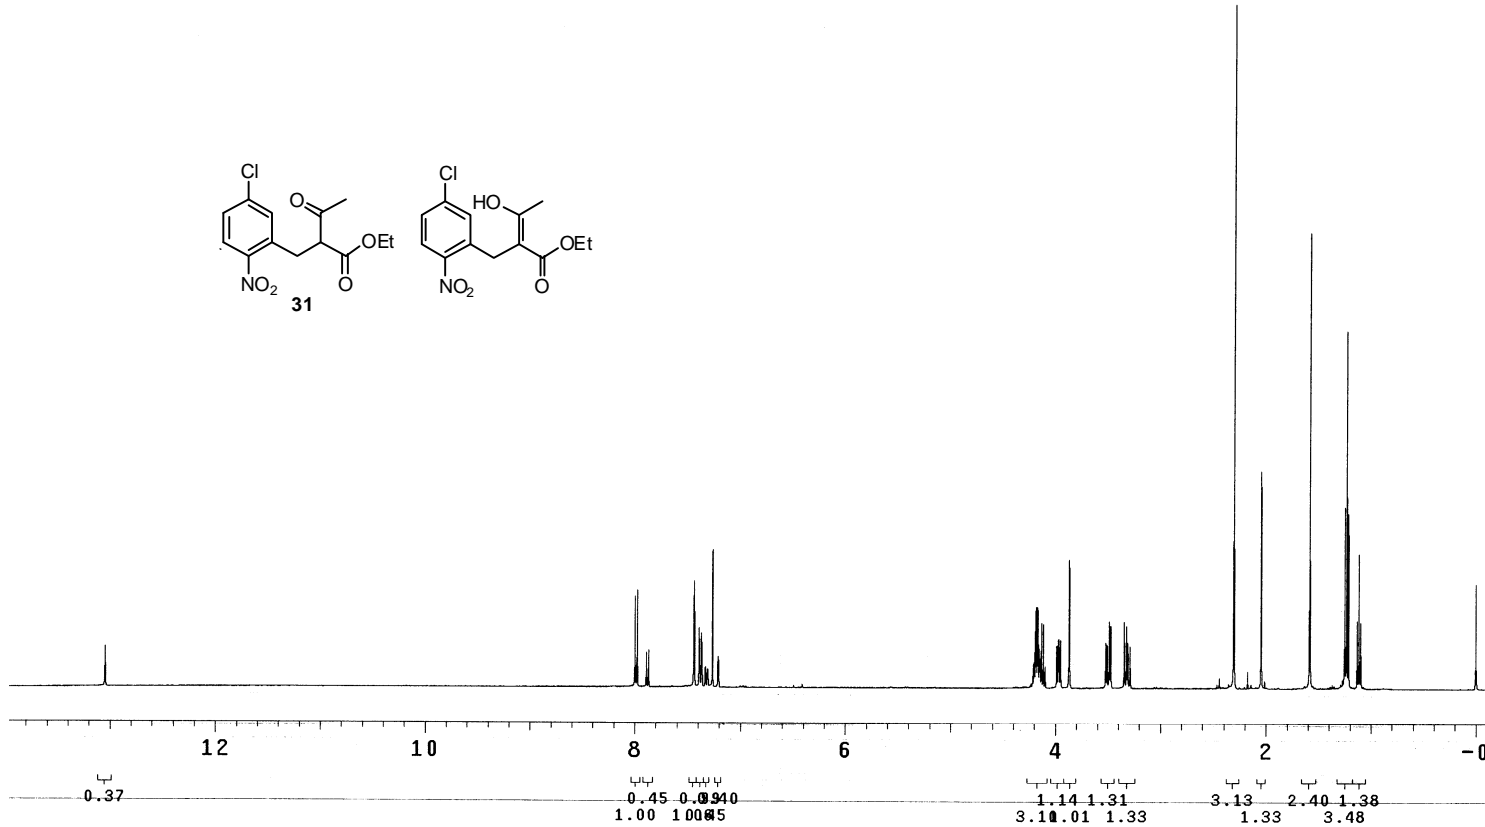

JYM-772-1-C

Sample: JYM-772-1-C  
Sample ID: s\_46\_JYM-772-1-C\_koo-4\_20130808\_01  
File: /home/walkup2/vnmrSYS/data/koo-4/JYM-772-1-C\_Carbon\_01.fid

Pulse Sequence: s2pu1

Solvent: cdc13  
Ambient temperature  
Sample #46, Operator: walkup2  
File: JYM-772-1-C\_Carbon\_01  
VNMR-400 "400MR"

Relax. delay 1.000 sec  
Pulse 45.0 degrees  
Acq. time 1.300 sec  
Width 24509.8 Hz  
128 repetitions  
OBSERVE C13, 100.5886385 MHz  
DECOUPLE H1, 400.0360169 MHz  
Power 42 dB  
continuously on  
WALTZ-16 modulated  
DATA PROCESSING  
Line broadening 0.5 Hz  
FT size 65536  
Total time 4 min, 56 sec

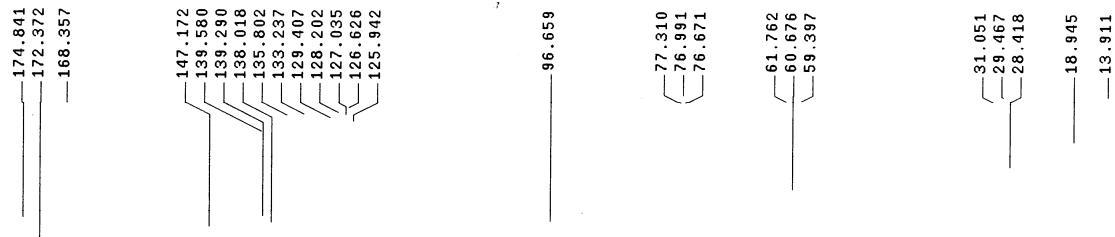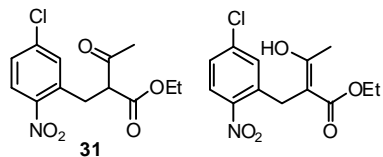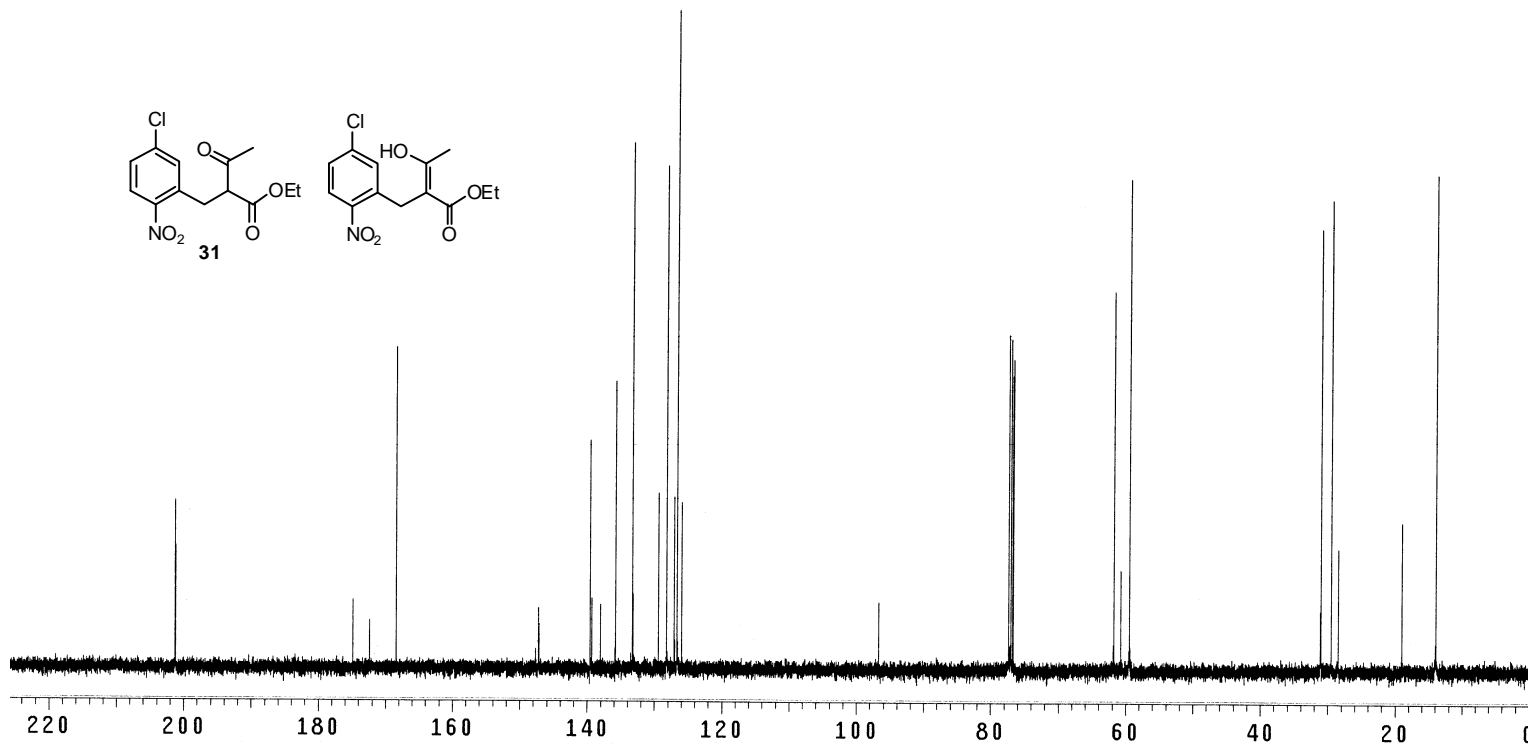

JYM-776

Sample: JYM-776  
Sample ID: s\_33\_JYM-776\_koo-4\_20130808\_01  
File: /home/walkup2/vnmrfsys/data/koo-4/JYM-776\_Proton\_01.fid

Pulse Sequence: s2pu1  
Solvent: cdc13  
Ambient temperature  
Sample #33, Operator: walkup2  
File: JYM-776\_Proton\_01  
VNMRS-400 "400MR"

Relax. delay 1.000 sec  
Pulse 45.0 degrees  
Acq. time 2.049 sec  
Width 6410.3 Hz  
8 repetitions  
OBSERVE H1, 400.0340080 MHz  
DATA PROCESSING  
Line broadening 0.5 Hz  
FT size 65536  
Total time 0 min, 31 sec

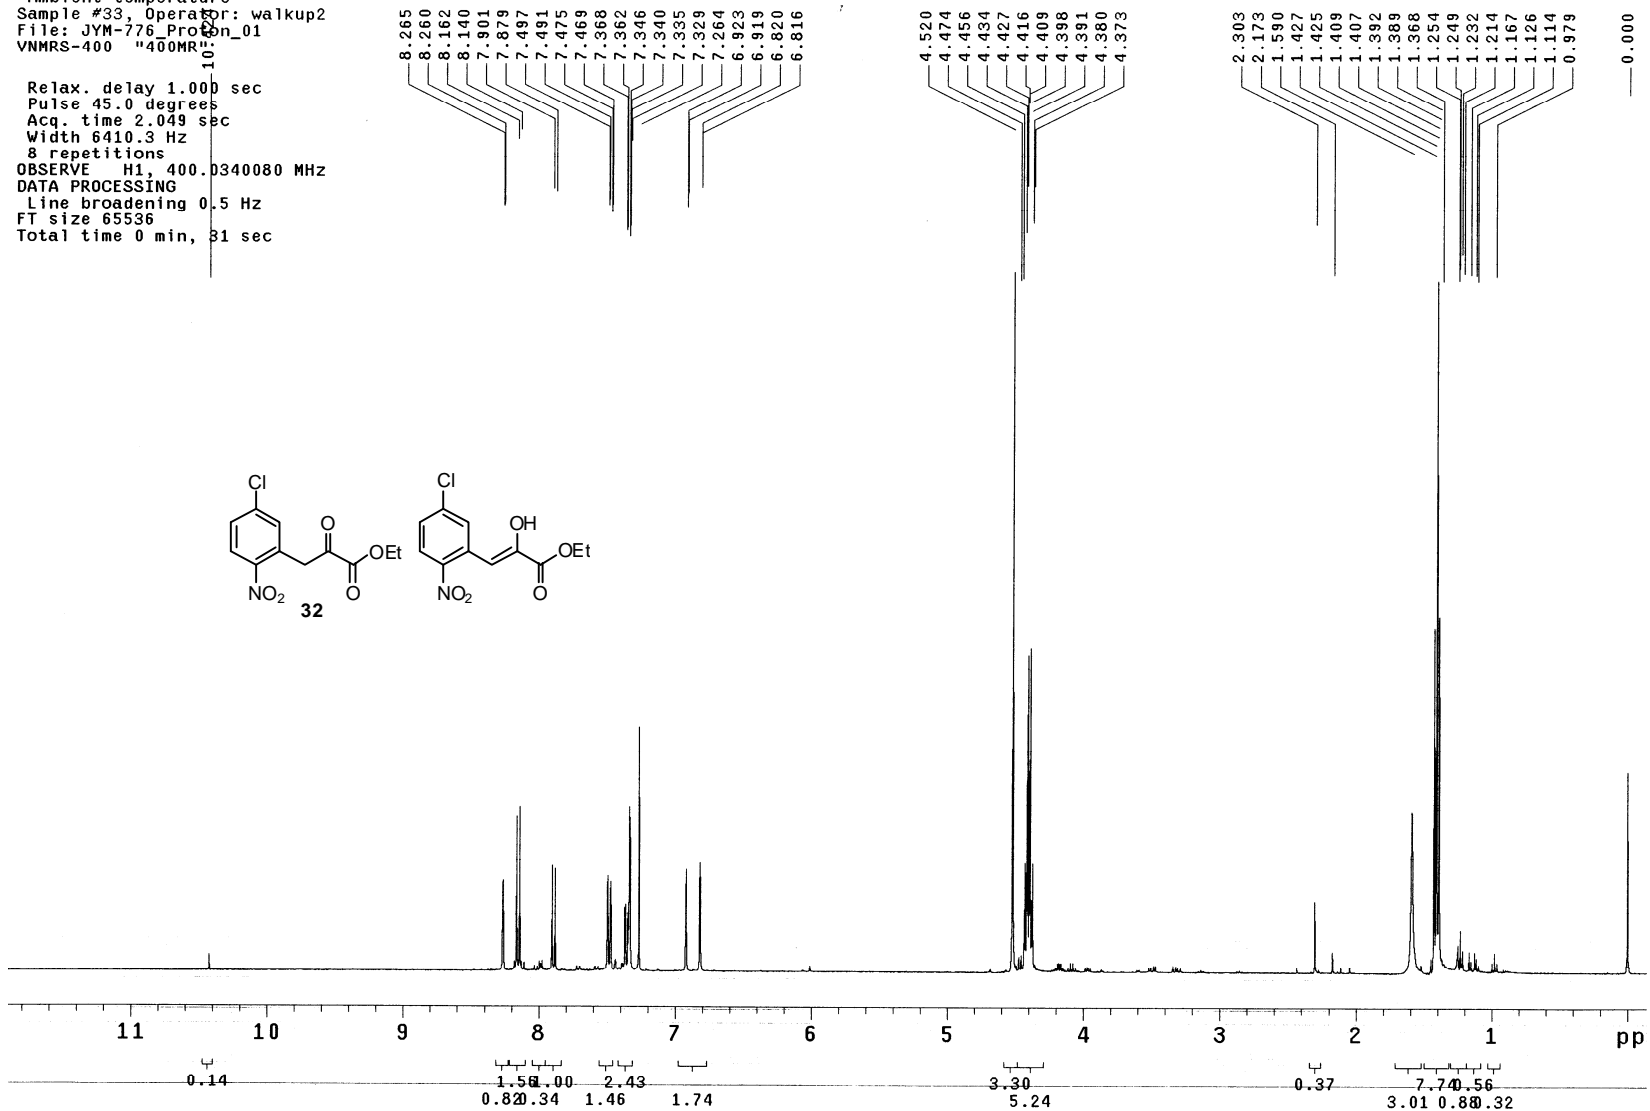

JYM-776-C

Sample: JYM-776-C  
Sample ID: s\_47\_JYM-776-C\_koo-4\_20130808\_01  
File: /home/walkup2/vnmrsys/data/koo-4/JYM-776-C\_Carbon\_01.fid

Pulse Sequence: s2pu1

Solvent: cdcl3  
Ambient temperature  
Sample #47, Operator: walkup2  
File: JYM-776-C\_Carbon\_01  
VNMR-400 "400MR"

Relax. delay 1.000 sec  
Pulse 45.0 degrees  
Acq. time 1.300 sec  
Width 24509.8 Hz  
128 repetitions  
OBSERVE C13, 100.5886360 MHz  
DECOUPLE H1, 400.0360169 MHz  
Power 42 dB  
continuously on  
WALTZ-16 modulated  
DATA PROCESSING  
Line broadening 0.5 Hz  
FT size 65536  
Total time 4 min, 56 sec

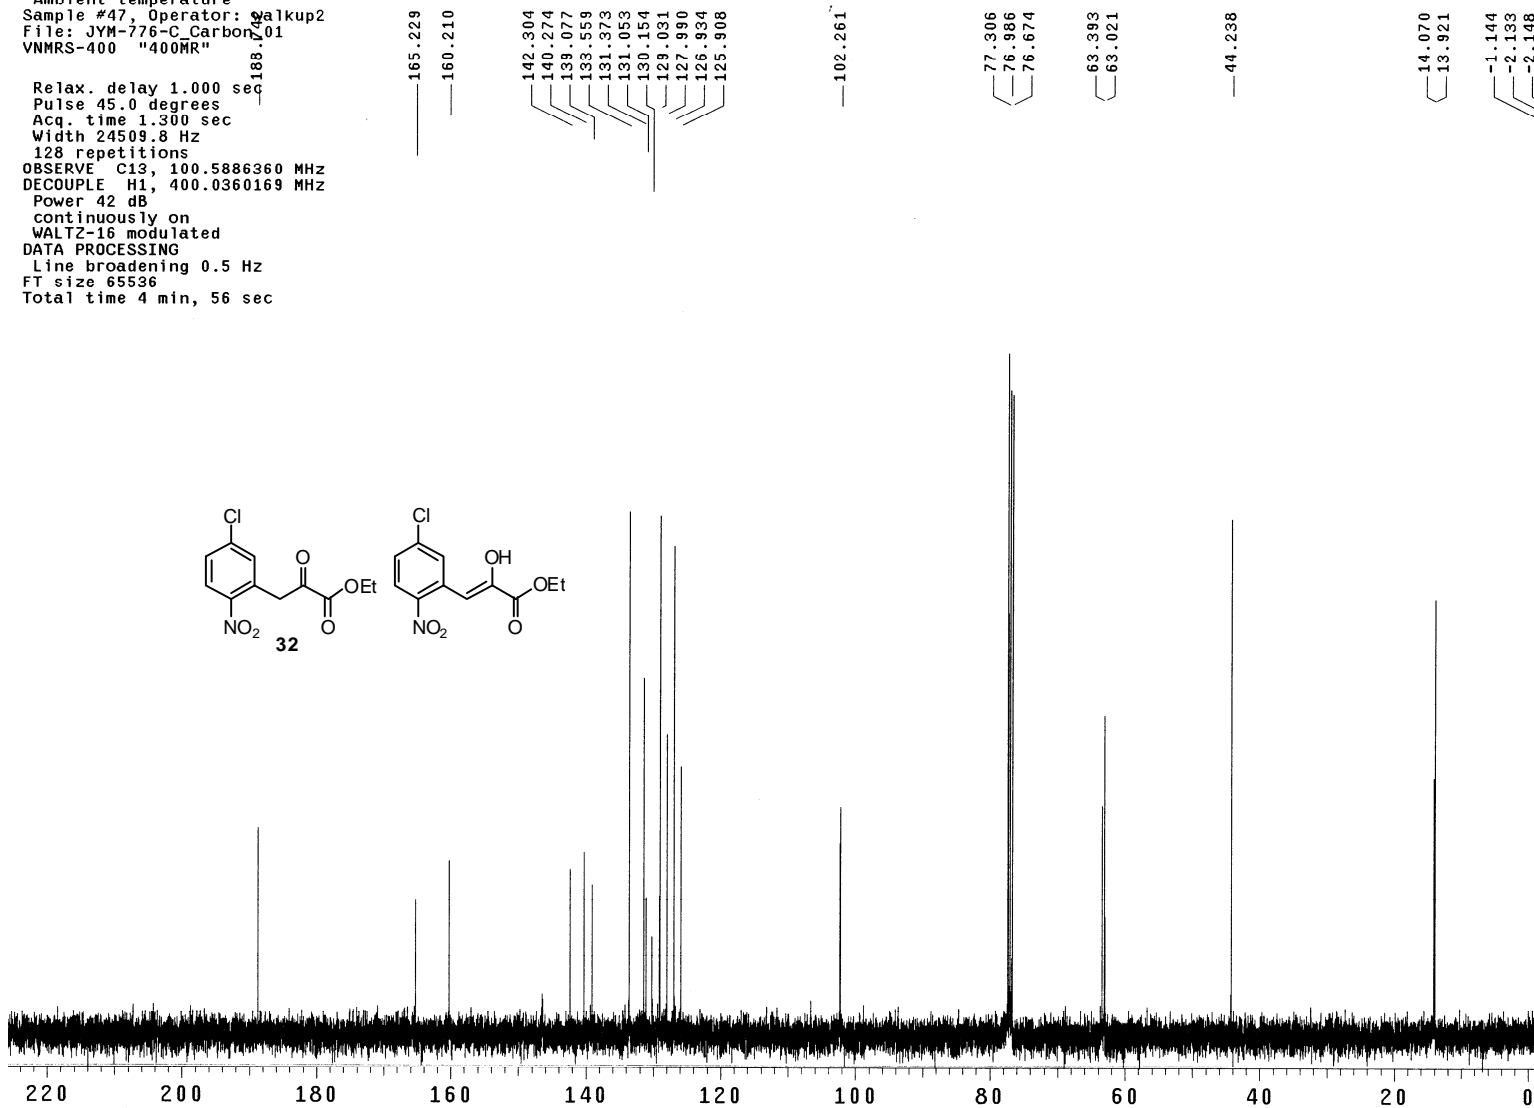

JYM-789

Sample: JYM-789  
Sample ID: s\_44\_JYM-789\_koo-4\_20130816\_01  
File: /home/walkup2/vnmrSYS/data/koo-4/JYM-789\_Proton\_01.fid

Pulse Sequence: s2pu1  
Solvent: cdc13  
Ambient temperature  
Sample #44, Operator: walkup2  
File: JYM-789\_Proton\_01  
VNMRS-400 "400MR"

Relax. delay 1.000 sec  
Pulse 45.0 degrees  
Acq. time 2.049 sec  
Width 6410.3 Hz  
8 repetitions  
OBSERVE H1, 400.0340078 MHz  
DATA PROCESSING  
Line broadening 0.5 Hz  
FT size 65536  
Total time 0 min, 31 sec

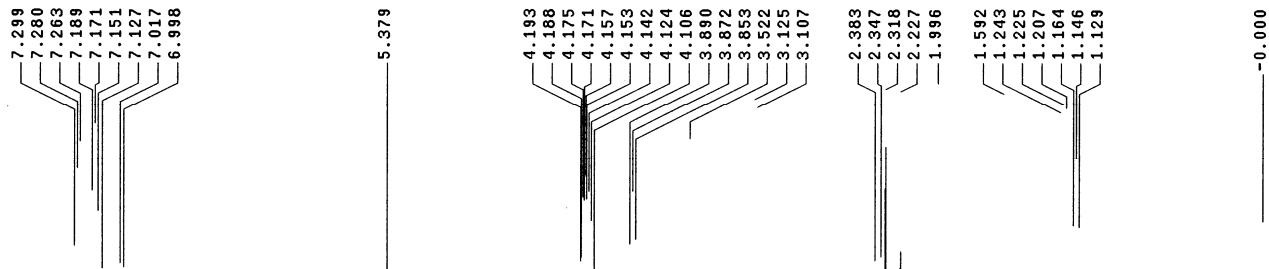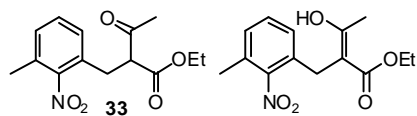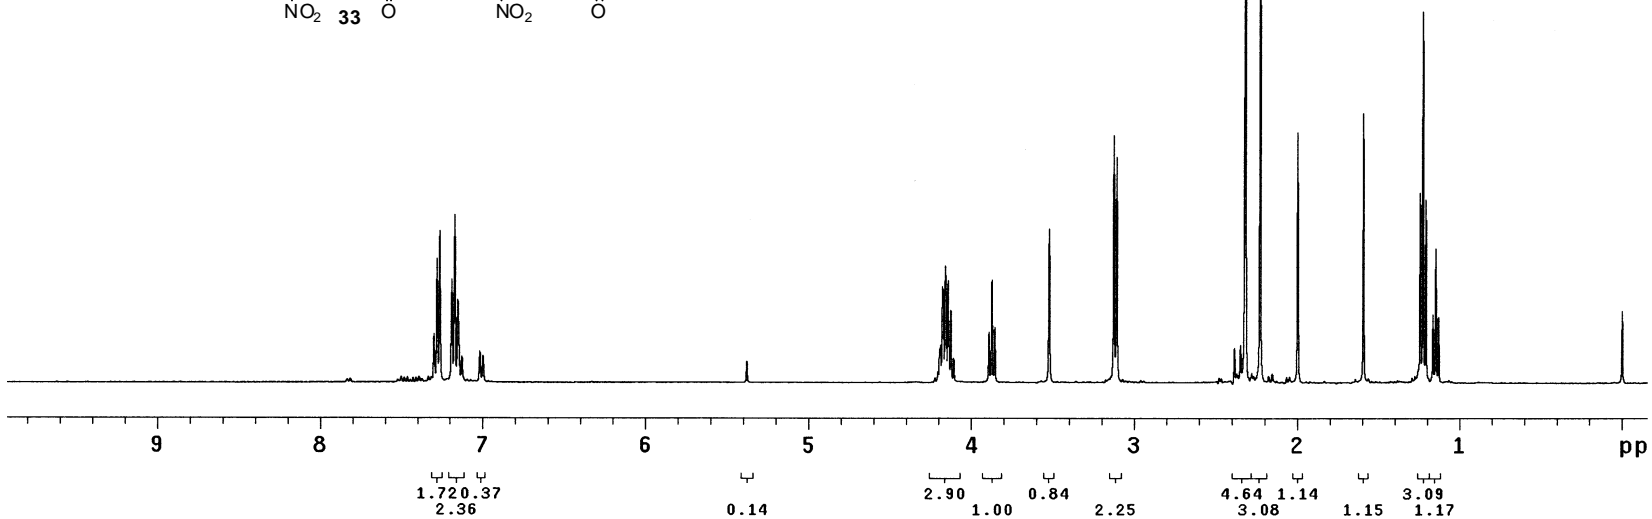

JYM-789-C

Sample: JYM-789-C

Sample ID: s\_45\_JYM-789-C\_koo-4\_20130821\_01

File: /home/walkup2/vnmrsys/data/koo-4/JYM-789-C\_Carbon\_01.fid

Pulse Sequence: s2pu1

Solvent: cdc13  
Ambient temperature  
Sample #45, Operator: walkup2  
File: JYM-789-C\_Carbon\_01  
VNMR-400 "400MR"

Relax. delay 1.000 sec  
Pulse 45.0 degrees  
Acq. time 1.300 sec  
Width 24509.8 Hz  
128 repetitions  
OBSERVE C13, 100.5886385 MHz  
DECOUPLE H1, 400.0360169 MHz  
Power 42 dB  
continuously on  
WALTZ-16 modulated  
DATA PROCESSING  
Line broadening 0.5 Hz  
FT size 65536  
Total time 4 min, 56 sec

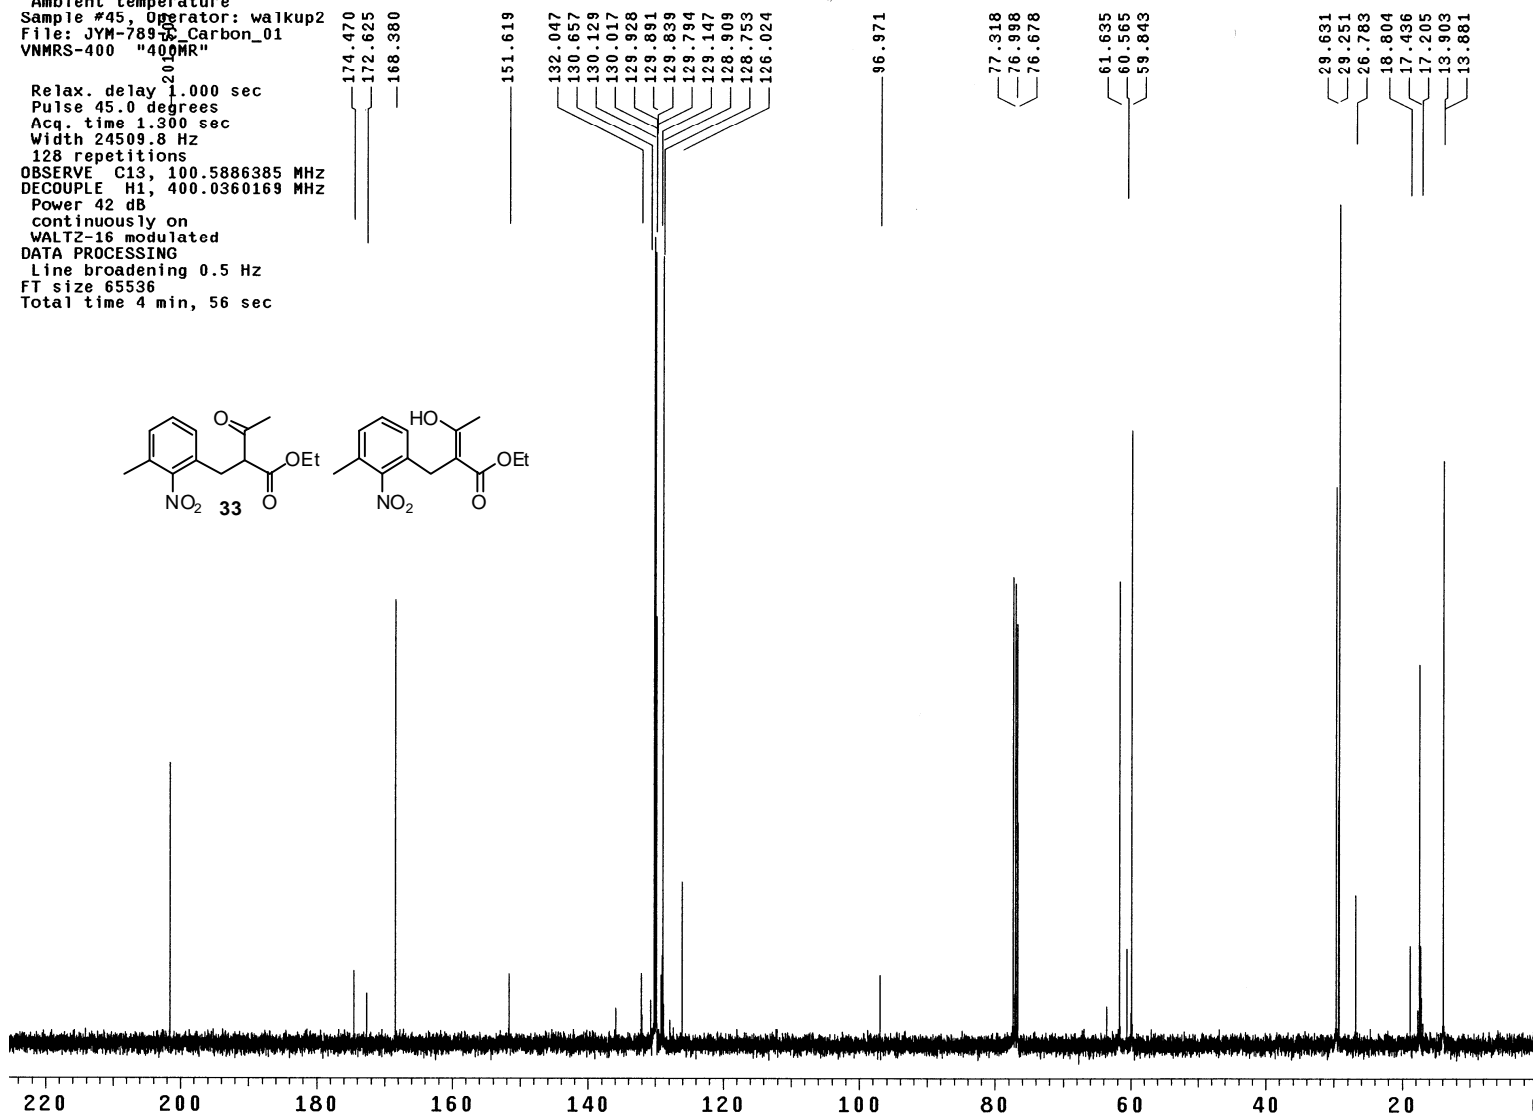



JYM-791

Sample: JYM-791  
Sample ID: s\_41\_JYM-791\_koo-4\_20130816\_01  
File: /home/walkup2/vnmrsys/data/koo-4/JYM-791\_Proton\_01.fid

Pulse Sequence: s2pu1  
Solvent: cdc13  
Ambient temperature  
Sample #41, Operator: walkup2  
File: JYM-791\_Proton\_01  
VNMR5-400 "400MR"

Relax. delay 1.000 sec  
Pulse 45.0 degrees  
Acq. time 2.049 sec  
Width 6410.3 Hz  
8 repetitions  
OBSERVE H1, 400.0340076 MHz  
DATA PROCESSING  
Line broadening 0.5 Hz  
FT size 65536  
Total time 0 min, 31 sec

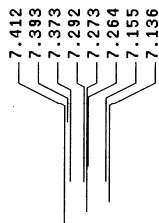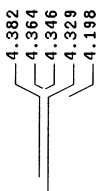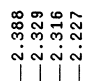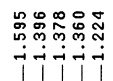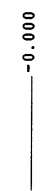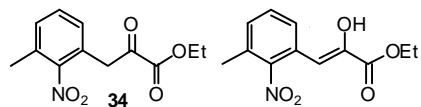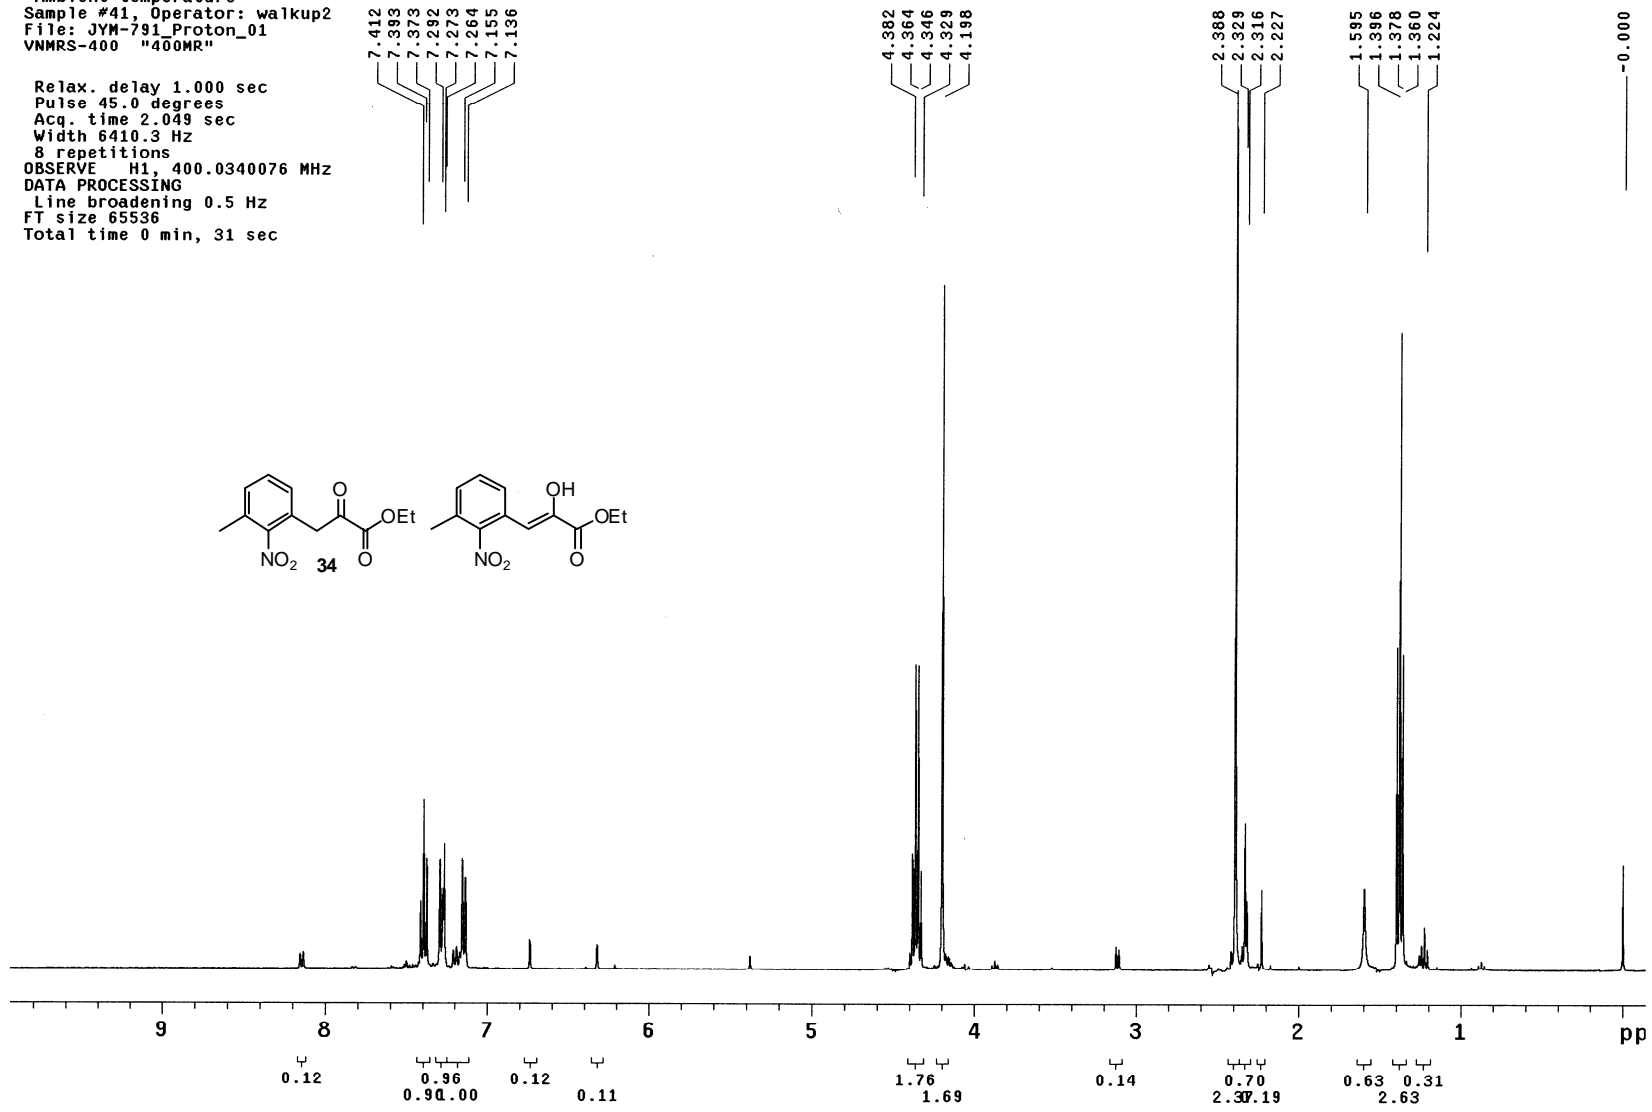

JYM-791-C

Sample: JYM-791-C  
Sample ID: s\_50\_JYM-791-C\_koo-4\_20130816\_02  
File: /home/walkup2/vnmrsys/data/koo-4/JYM-791-C\_Carbon\_01.fid

Pulse Sequence: s2pu1

Solvent: cdc13  
Ambient temperature  
Sample #50, Operator: walkup2  
File: JYM-791-C\_Carbon\_01  
VNMRS-400 "400MR"

Relax. delay 1.000 sec  
Pulse 45.0 degrees  
Acq. time 1.300 sec  
Width 24509.8 Hz  
256 repetitions  
OBSERVE C13, 100.5886338 MHz  
DECOUPLE H1, 400.0360169 MHz  
Power 42 dB  
continuously on  
WALTZ-16 modulated  
DATA PROCESSING  
Line broadening 0.5 Hz  
FT size 65536  
Total time 9 min, 51 sec

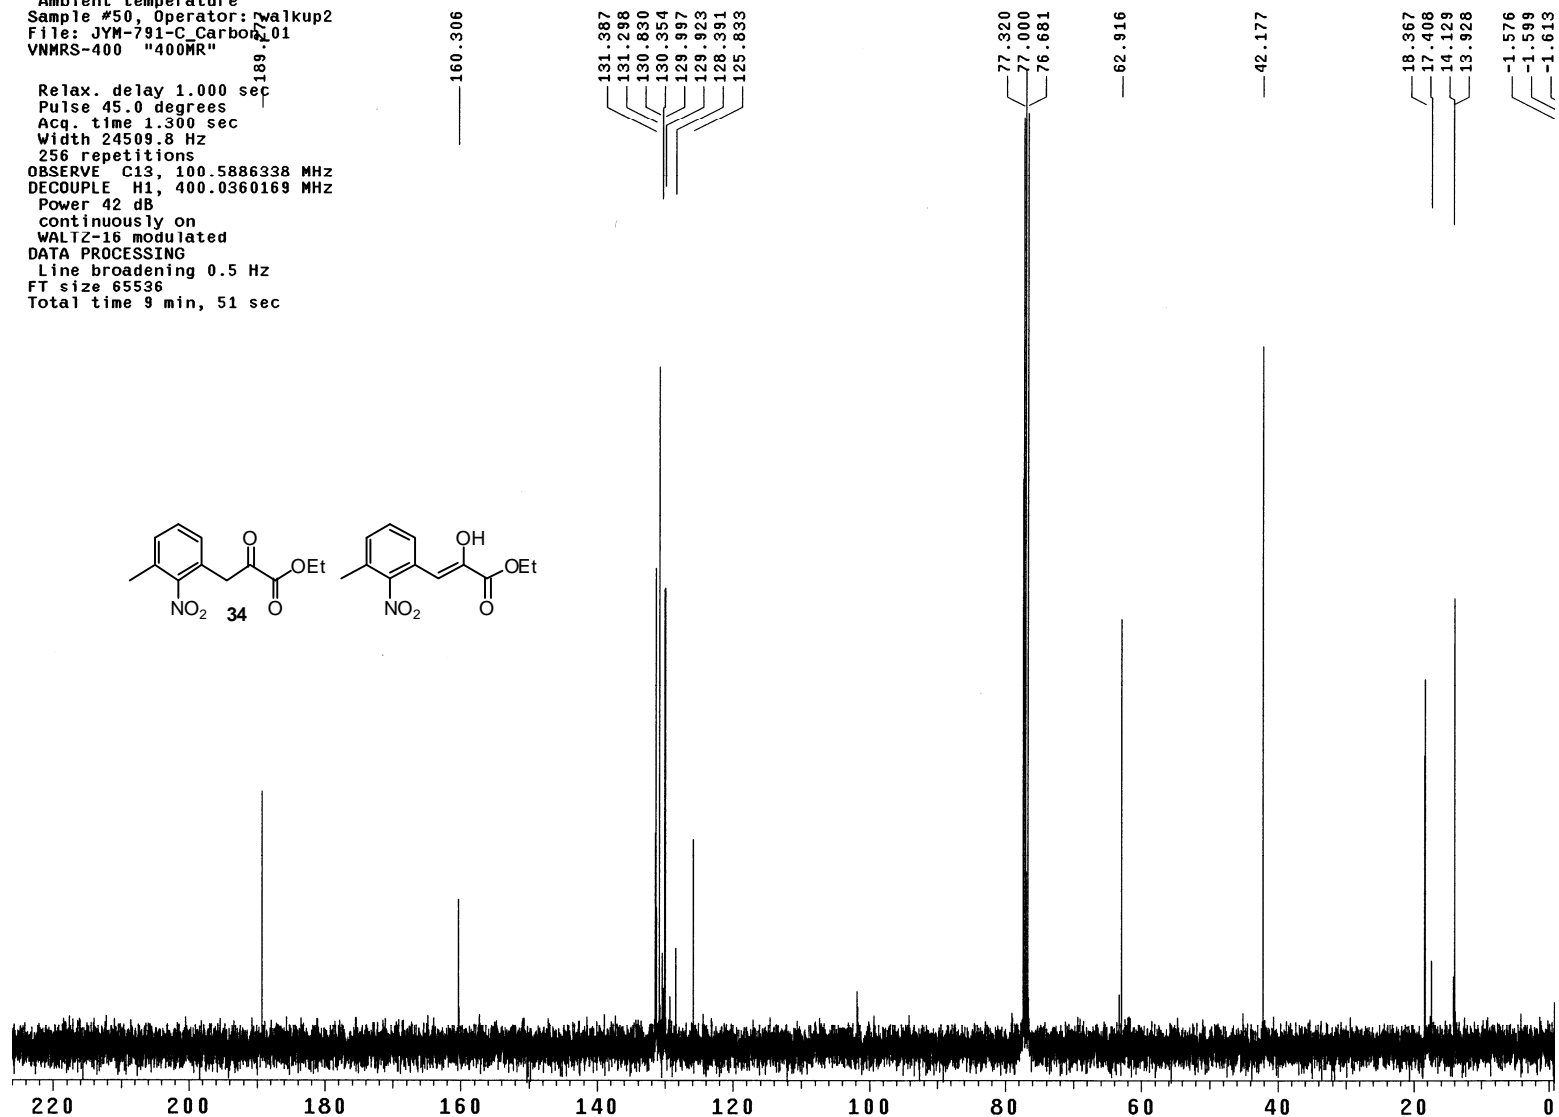

Sample: MD-J-35  
Sample ID: s\_42\_MD-J-35\_koo-4\_20140605\_01  
File: /home/walkup2/vnmrsys/data/koo-4/MD-J-35\_Proton\_01.fid

Pulse Sequence: s2pu1  
Solvent: cdc13  
Ambient temperature  
Sample #42, Operator: walkup2  
File: MD-J-35\_Proton\_01  
VNMR-400 "400MR"

Relax. delay 1.000 sec  
Pulse 45.0 degrees  
Acq. time 2.049 sec  
Width 6830.6 Hz  
8 repetitions  
OBSERVE H1, 400.0340106 MHz  
DATA PROCESSING  
Line broadening 0.5 Hz  
FT size 65536  
Total time 0 min, 31 sec

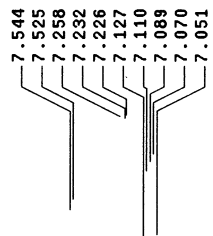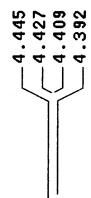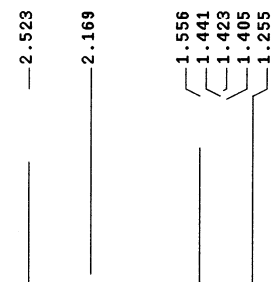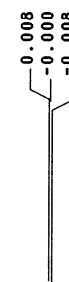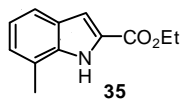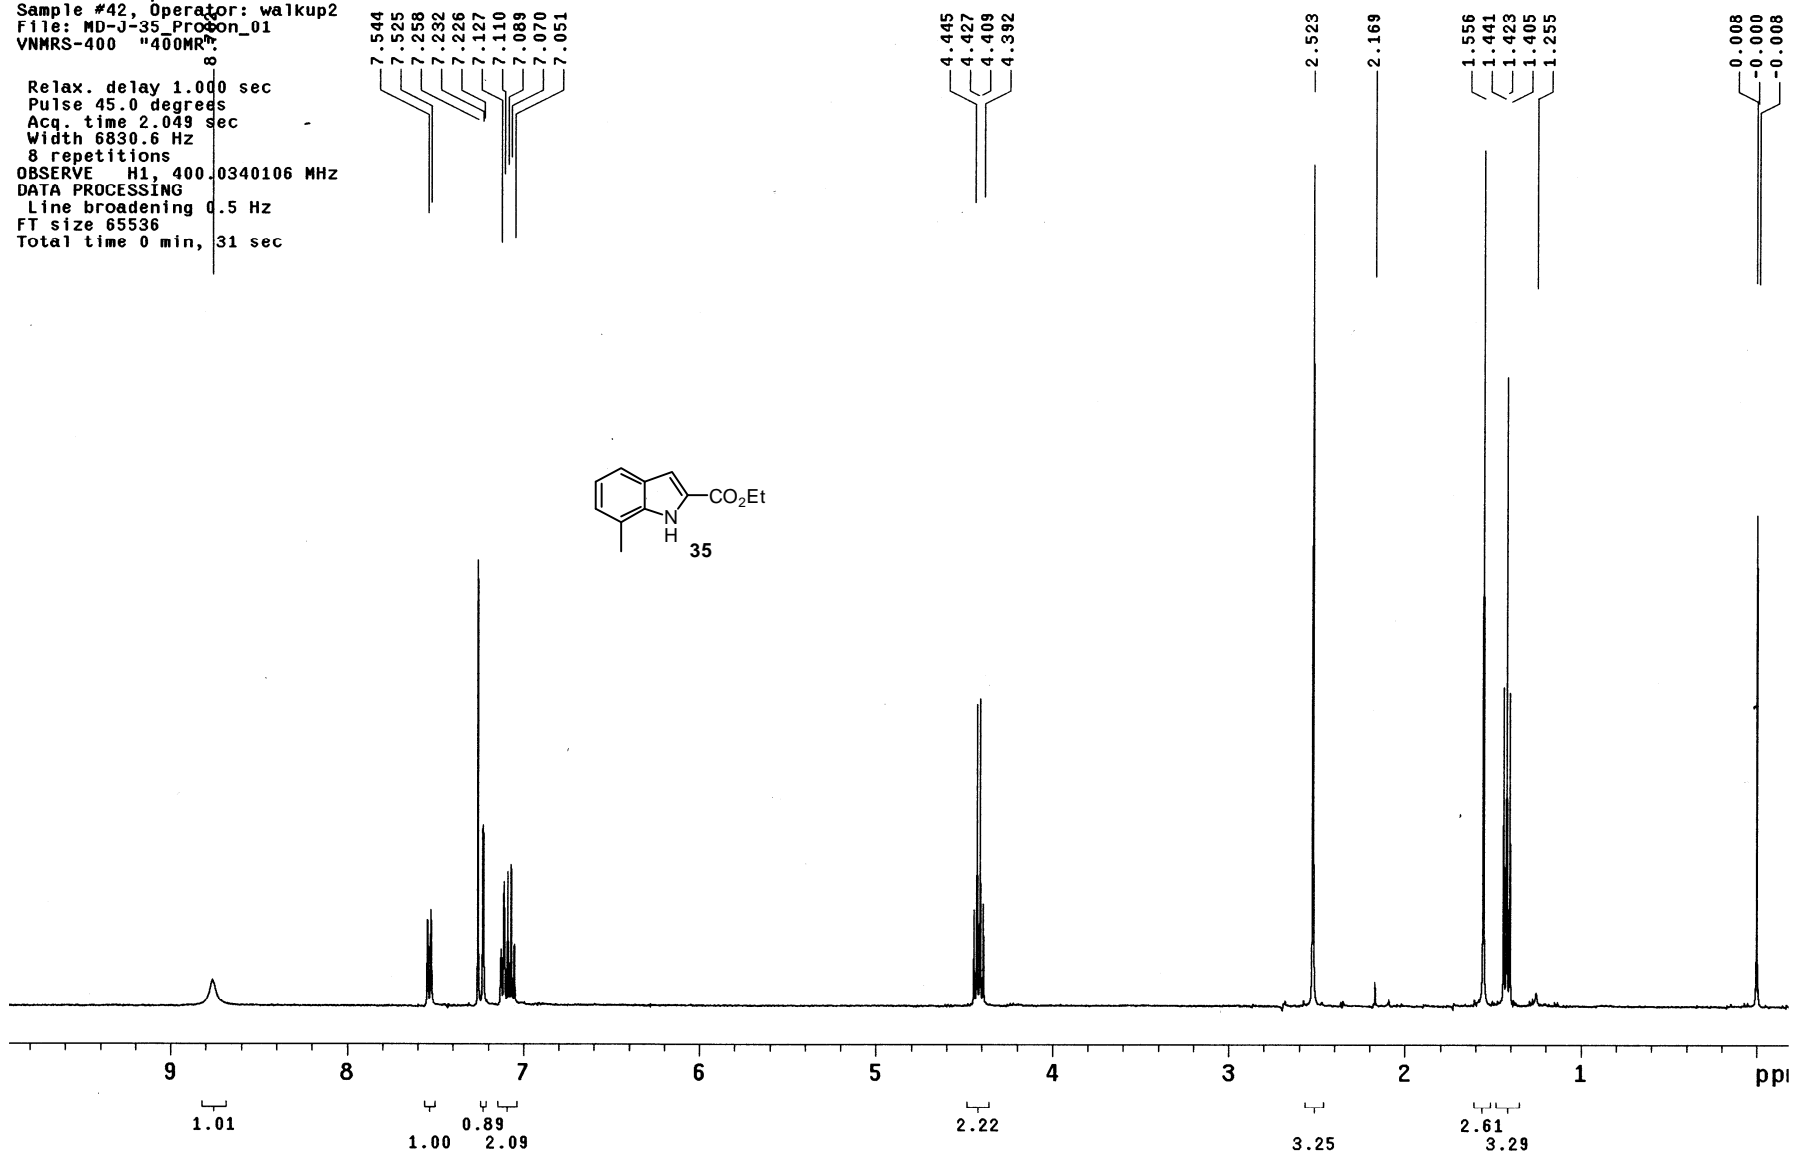

Sample: MD-J-35  
Sample ID: s\_40\_MD-J-35\_koo-4\_20140605\_01  
File: /home/walkup2/vnmrsys/data/koo-4/MD-J-35\_Carbon\_01.fid

Pulse Sequence: s2pu1

Solvent: cdc13  
Ambient temperature  
Sample #40, Operator: walkup2  
File: MD-J-35\_Carbon\_01  
VNMR-400 "400MR"

Relax. delay 1.000 sec  
Pulse 45.0 degrees  
Acq. time 1.300 sec  
Width 24509.8 Hz  
512 repetitions  
OBSERVE C13, 100.5886331 MHz  
DECOUPLE H1, 400.0360169 MHz  
Power 42 dB  
continuously on  
WALTZ-16 modulated  
DATA PROCESSING  
Line broadening 0.5 Hz  
FT size 65536  
Total time 19 min, 42 sec

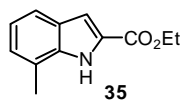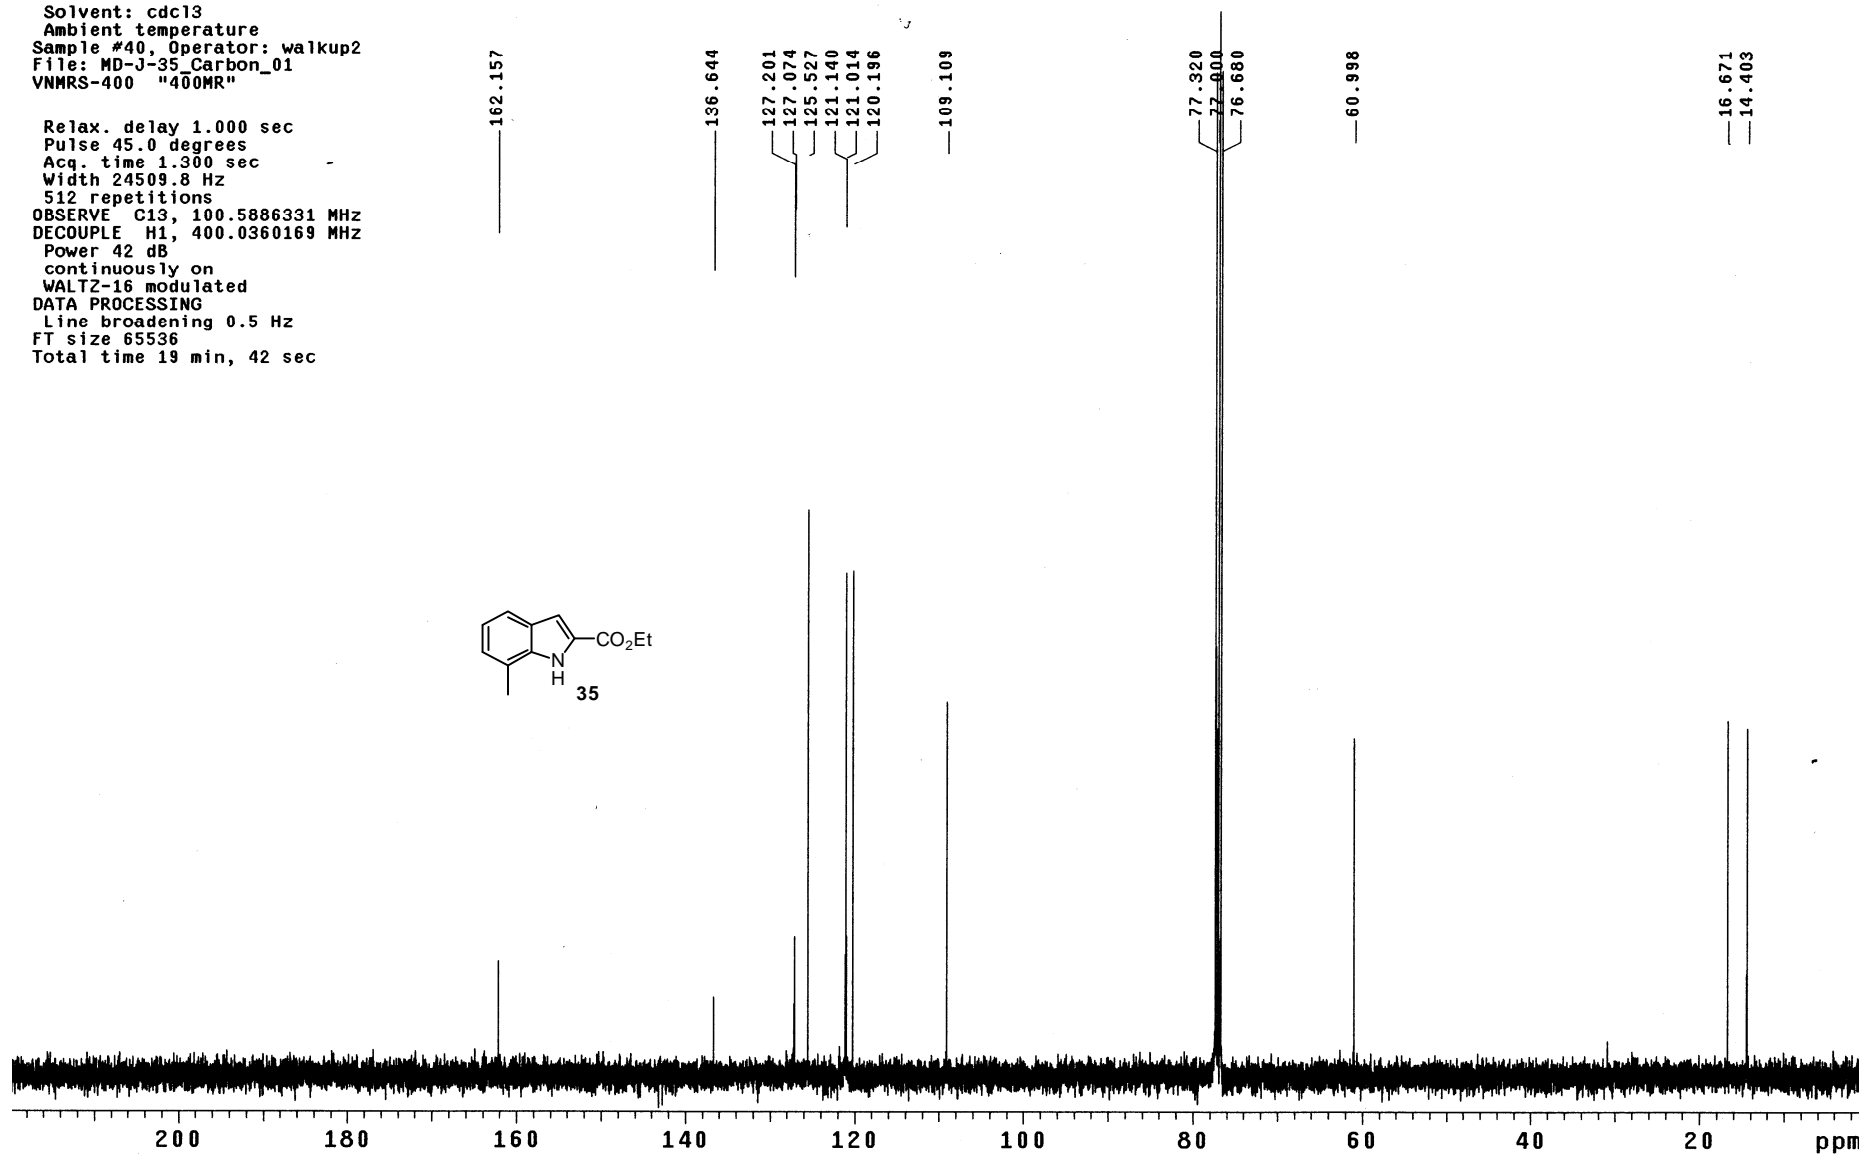

JYM-785

Sample: JYM-785  
Sample ID: s\_45\_JYM-785\_koo-4\_20130814\_01  
File: /home/walkup2/vnmr/sys/data/koo-4/JYM-785\_Proton\_02.fid

Pulse Sequence: s2pu1

Solvent: cdc13  
Ambient temperature  
Sample #45, Operator: wa  
File: JYM-785\_Proton\_02  
VNMR5-400 "400MR"

Relax. delay 1.000 sec  
Pulse 45.0 degrees  
Acq. time 2.049 sec  
Width 6410.3 Hz  
8 repetitions  
OBSERVE H1, 400.0340054 MHz  
DATA PROCESSING  
Line broadening 0.5 Hz  
FT size 65536  
Total time 0 min, 31 sec

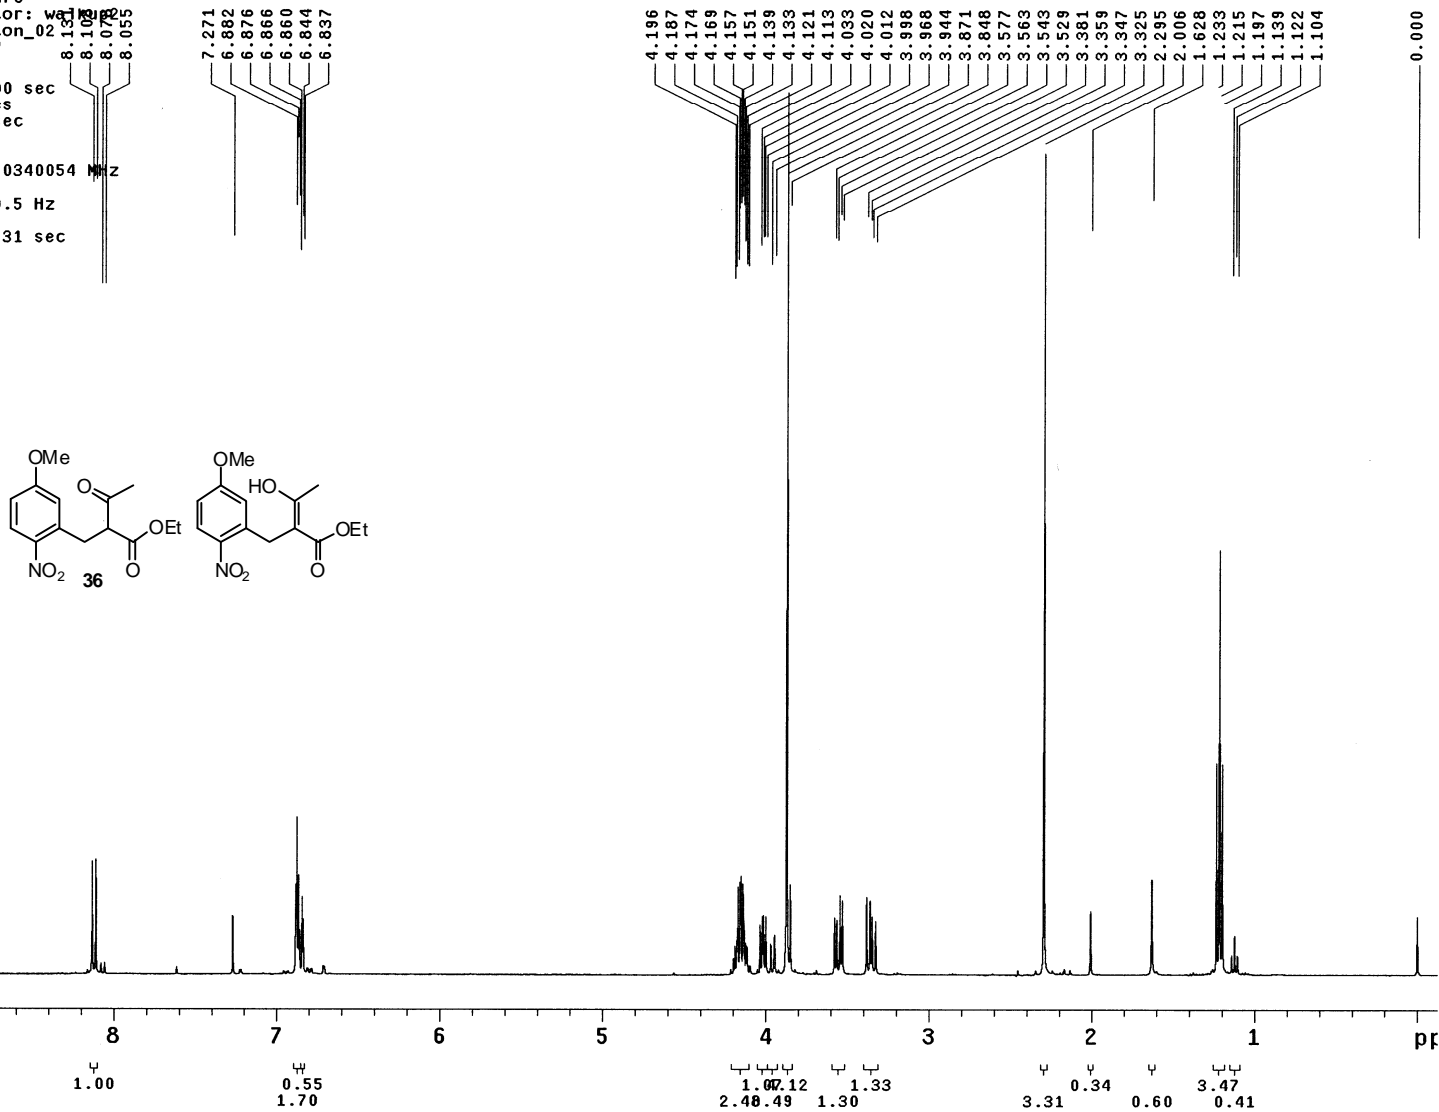

JYM-785-C

Sample: JYM-785-C  
Sample ID: s\_47\_JYM-785-C\_koo-4\_20130814\_01  
File: /home/walkup2/vnmrsys/data/koo-4/JYM-785-C\_Carbon\_01.fid

Pulse Sequence: s2pu1

Solvent: cdc13  
Ambient temperature  
Sample #47, Operator: walkup2  
File: JYM-785-C\_Carbon\_01  
VNMR-400 "400MR"

Relax. delay 1.000 sec  
Pulse 45.0 degrees  
Acq. time 1.300 sec  
Width 24509.8 Hz  
128 repetitions  
OBSERVE C13, 100.5886372 MHz  
DECOUPLE H1, 400.0360169 MHz  
Power 42 dB  
continuously on  
WALTZ-16 modulated  
DATA PROCESSING  
Line broadening 0.5 Hz  
FT size 65536  
Total time 4 min, 56 sec

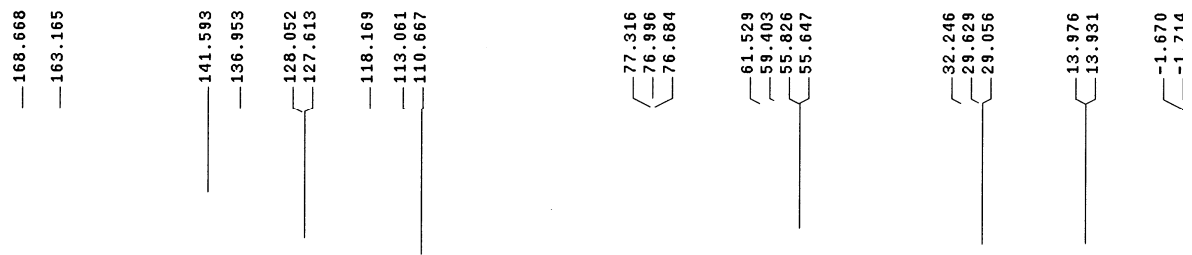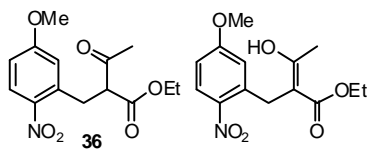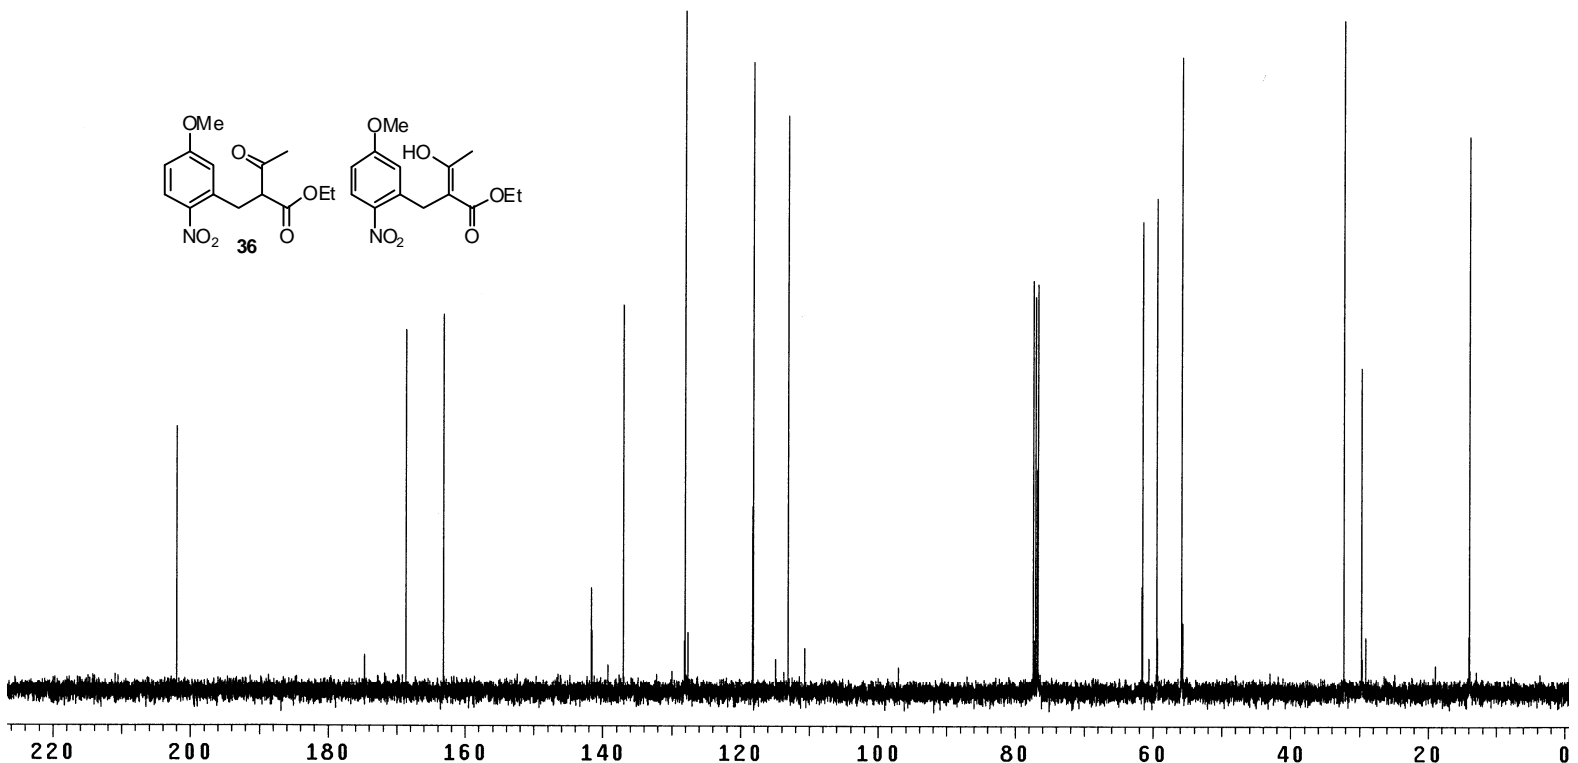

JYM-790

Sample: JYM-790  
Sample ID: s\_40\_JYM-790\_koo-4\_20130816\_01  
File: /home/walkup2/vnmr/sys/data/koo-4/JYM-790\_Proton\_01.fid

Pulse Sequence: s2pu1

Solvent: cdc13  
Ambient temperature  
Sample #40, Operator: walkup2  
File: JYM-790\_Proton\_01.fid  
VNMRS-400 "400MR"

Relax. delay 1.000 sec  
Pulse 45.0 degrees  
Acq. time 2.049 sec  
Width 6410.3 Hz  
8 repetitions  
OBSERVE H1, 400.0340068 MHz  
DATA PROCESSING  
Line broadening 0.5 Hz  
FT size 65536  
Total time 0 min, 31 sec

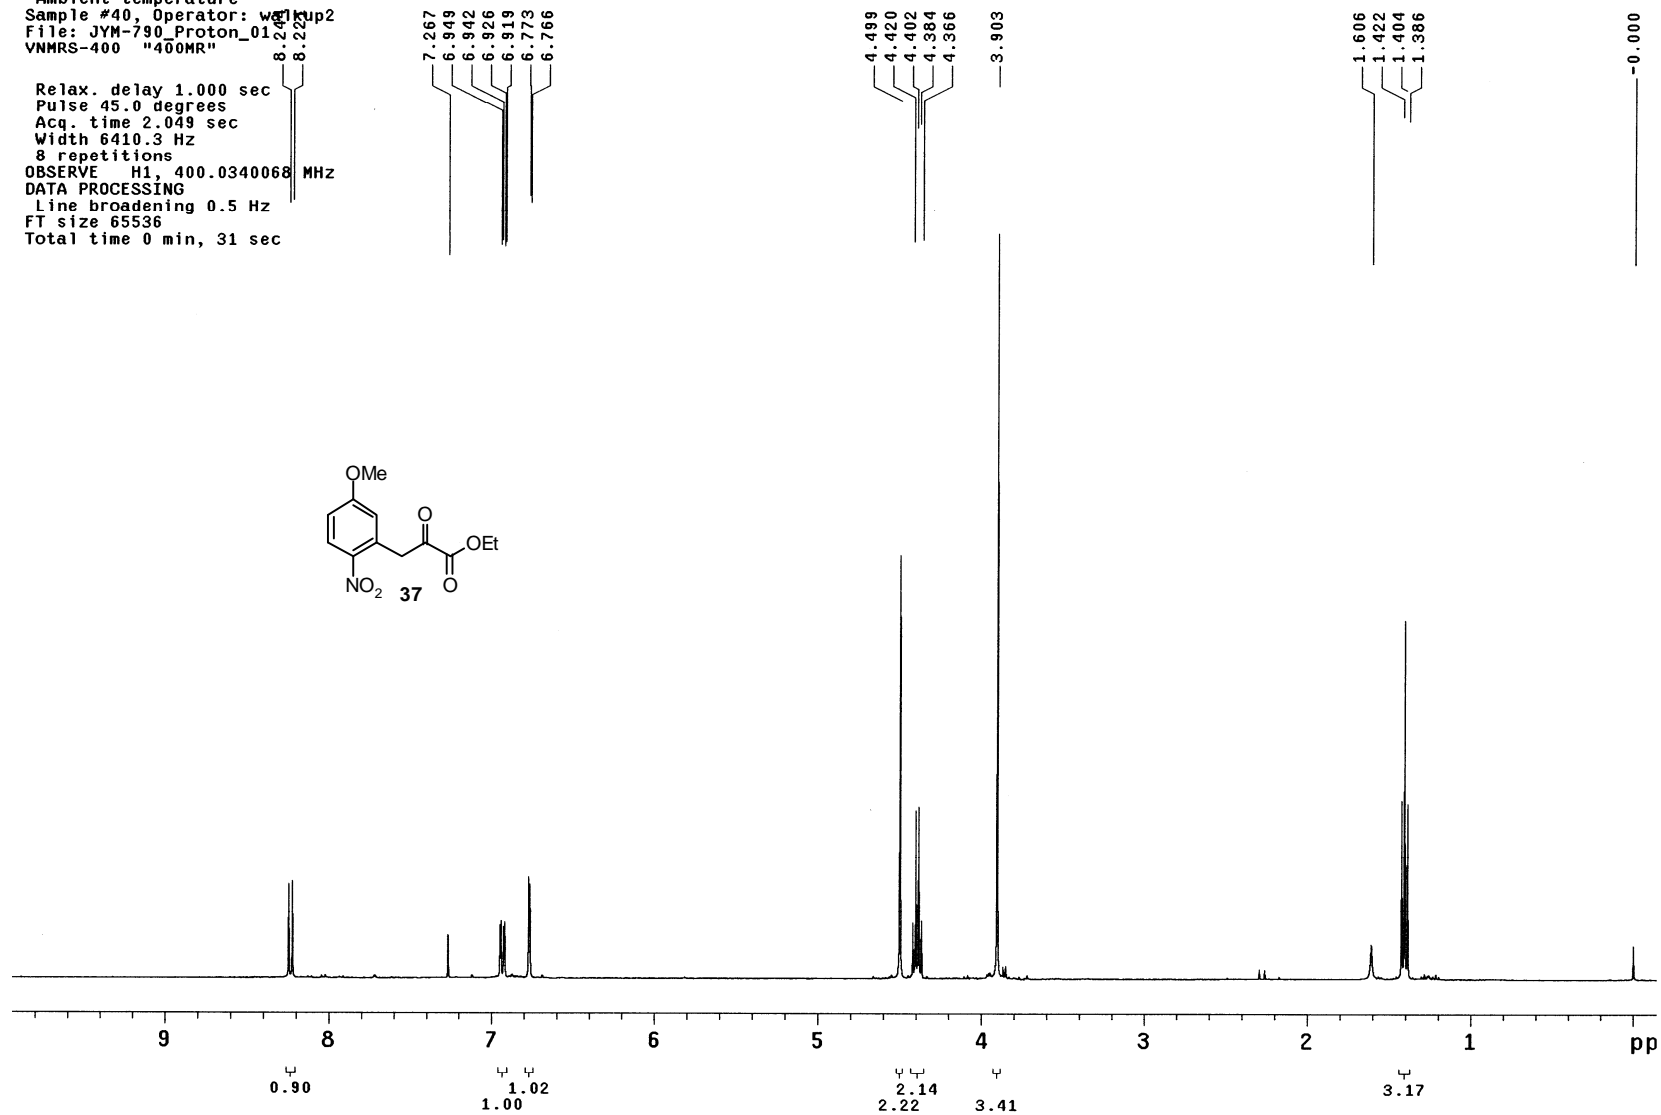

JYM-790-C

Sample: JYM-790-C

Sample ID: s\_49\_JYM-790-C\_koo-4\_20130816\_01

File: /home/walkup2/vnmrsys/data/koo-4/JYM-790-C\_Carbon\_01.fid

Pulse Sequence: s2pu1

Solvent: cdc13

Ambient temperature

Sample #49, Operator: walkup2

File: JYM-790-C\_Carbon\_01

VNMRS-400 "400MR"

Relax. delay 1.000 sec

Pulse 45.0 degrees

Acq. time 1.300 sec

Width 24509.8 Hz

256 repetitions

OBSERVE C13, 100.5886350 MHz

DECOUPLE H1, 400.0360169 MHz

Power 42 dB

continuously on

WALTZ-16 modulated

DATA PROCESSING

Line broadening 0.5 Hz

FT size 65536

Total time 9 min, 51 sec

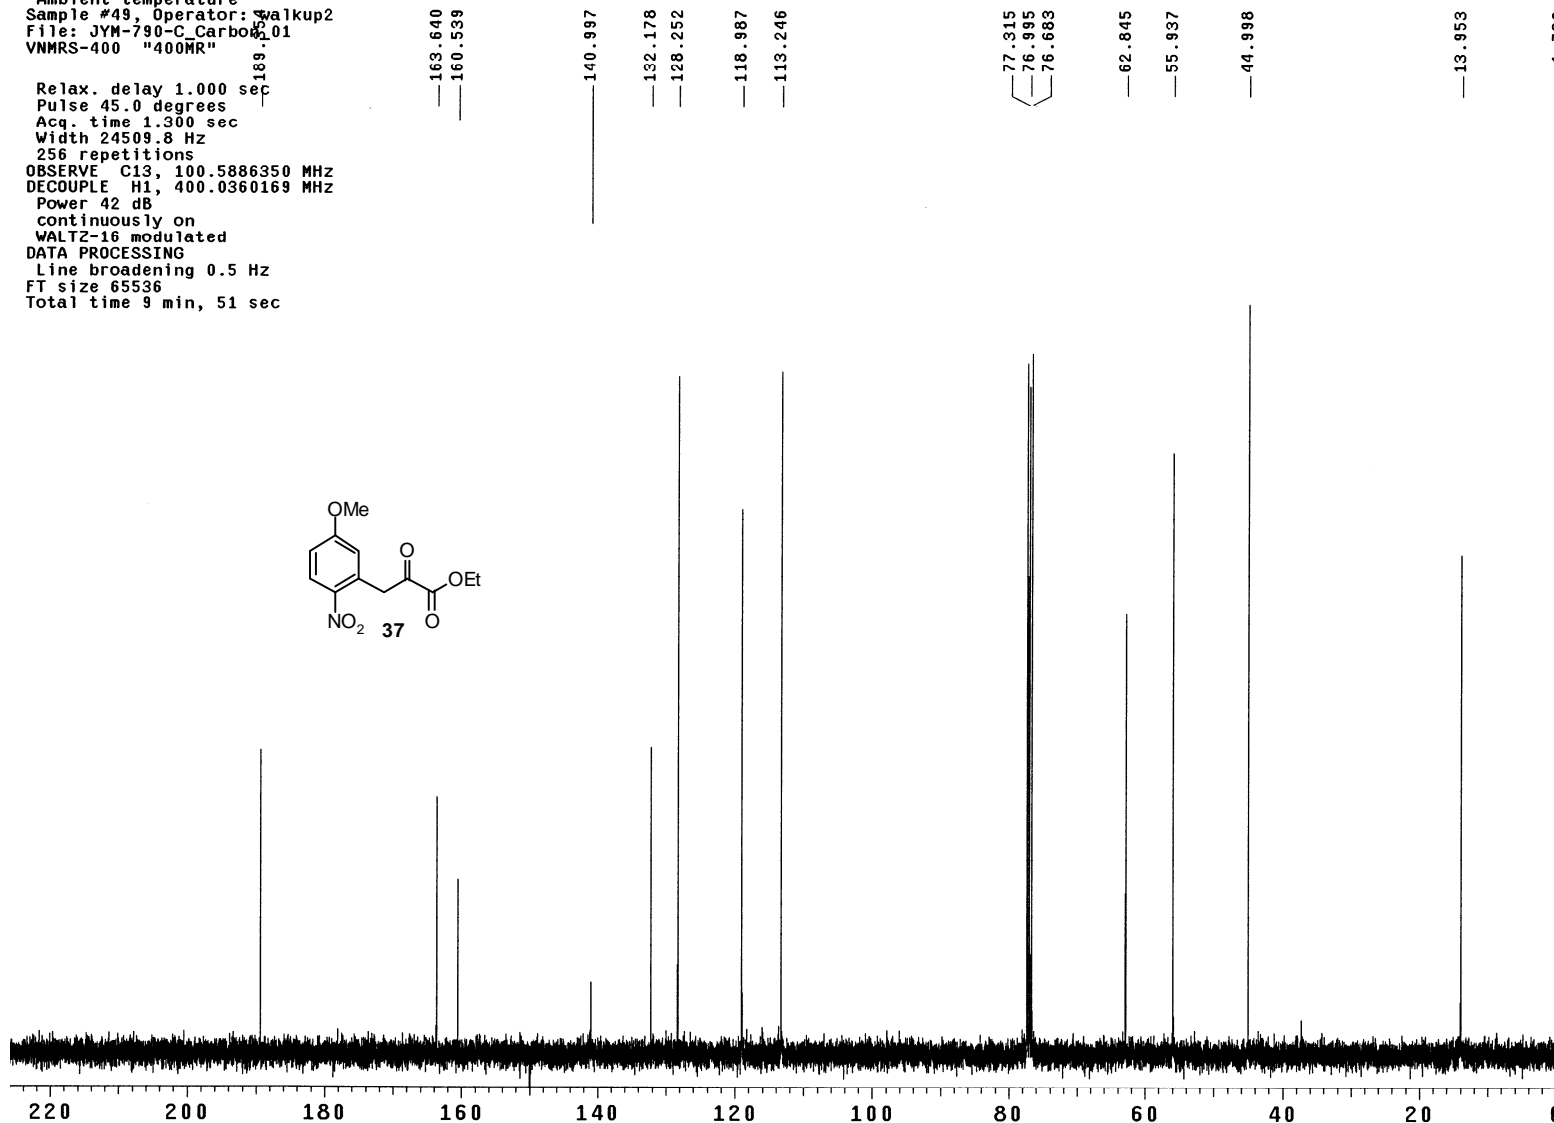



JYM-793

Sample: JYM-793  
Sample ID: s\_40\_JYM-793\_koo-2\_20130821\_01  
File: /home/walkup2/vnmrsys/data/koo-2/JYM-793\_Proton\_01.fid

Pulse Sequence: s2pu1  
Solvent: cdcl3  
Ambient temperature  
Sample #40, Operator: walkup2  
File: JYM-793\_Proton\_01  
VNMR-400 "400MR"

Relax. delay 1.000 sec  
Pulse 45.0 degrees  
Acq. time 2.049 sec  
Width 6410.3 Hz  
8 repetitions  
OBSERVE H1, 400.0340103 MHz  
DATA PROCESSING  
Line broadening 0.5 Hz  
FT size 65536  
Total time 0 min, 31 sec

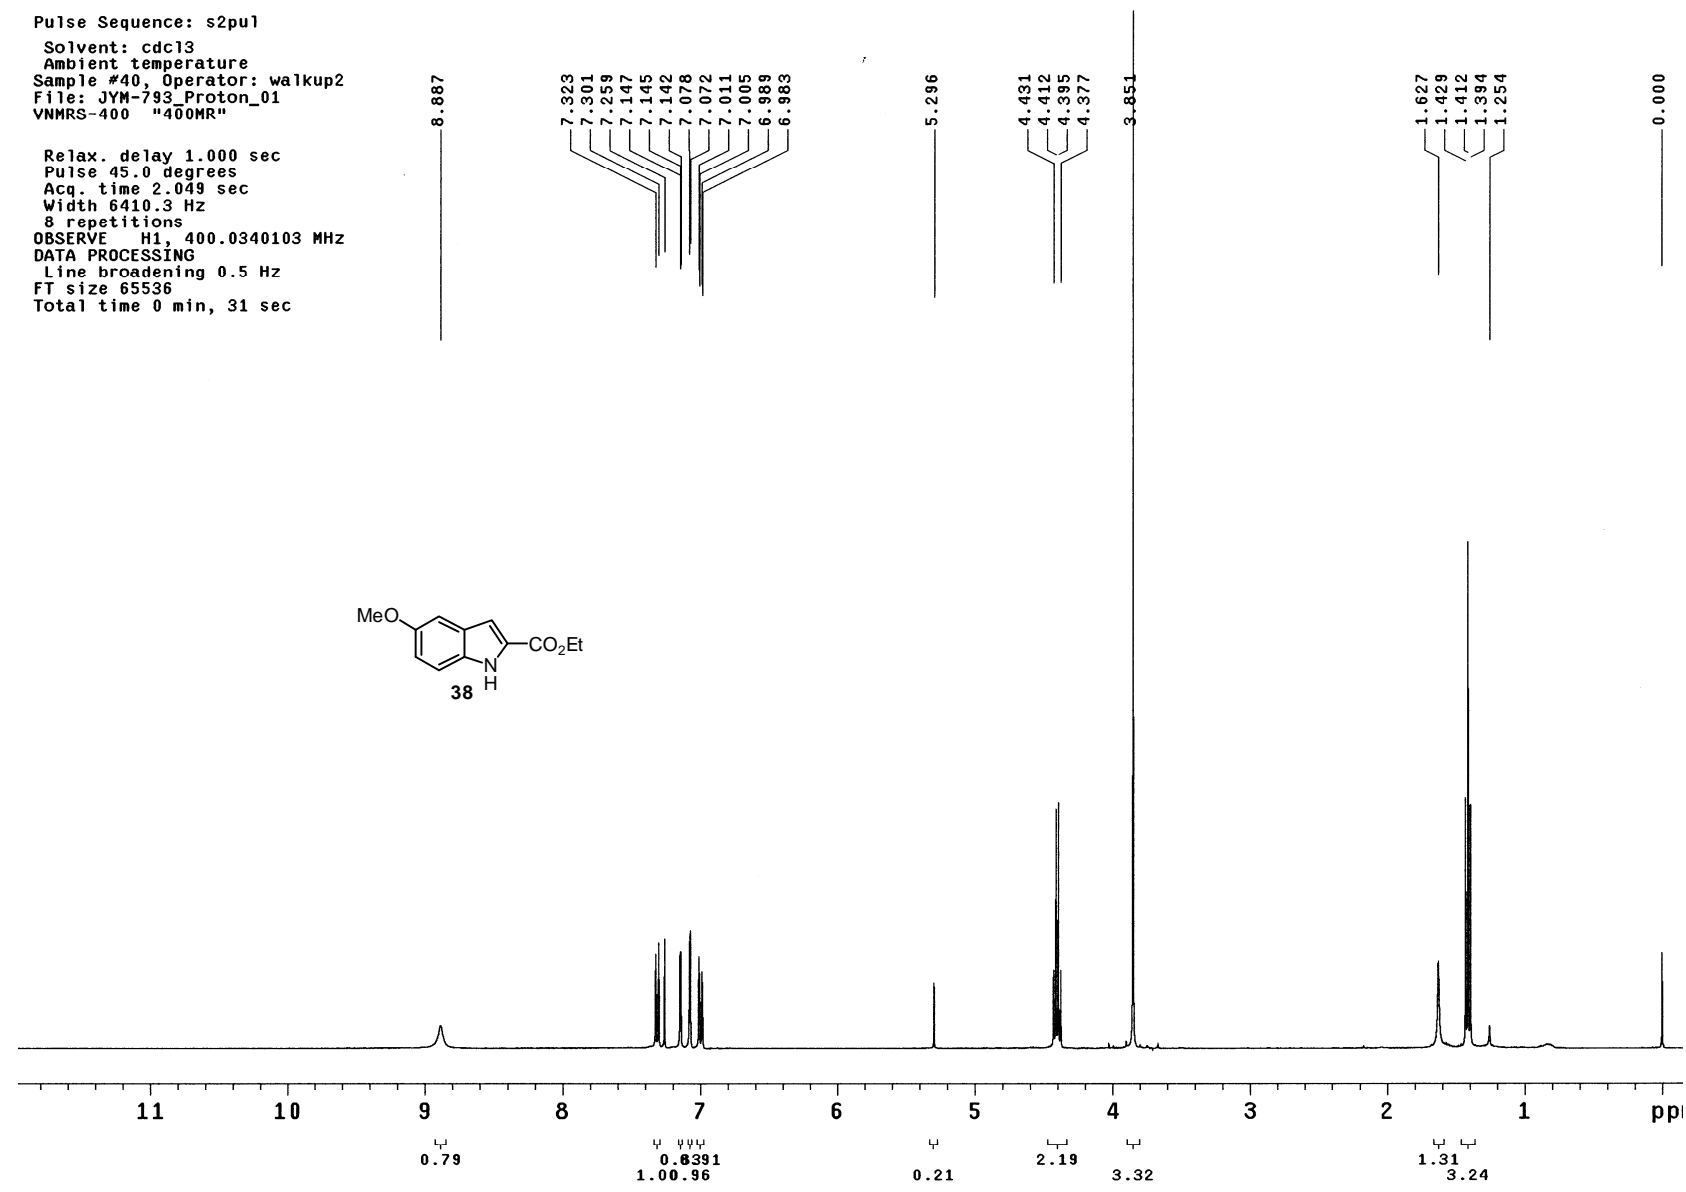

JYM-793-C

Sample: JYM-793-C

Sample ID: s\_46\_JYM-793-C\_koo-4\_20130822\_01

File: /home/walkup2/vnmrSYS/data/koo-4/JYM-793-C\_Carbon\_01.fid

Pulse Sequence: s2pu1

Solvent: cdc13  
Ambient temperature  
Sample #46, Operator: walkup2  
File: JYM-793-C\_Carbon\_01  
VNMR-400 "400MR"

Relax. delay 1.000 sec  
Pulse 45.0 degrees  
Acq. time 1.300 sec  
Width 24509.8 Hz  
256 repetitions  
OBSERVE C13, 100.5886382 MHz  
DECOUPLE H1, 400.0360169 MHz  
Power 42 dB  
continuously on  
WALTZ-16 modulated  
DATA PROCESSING  
Line broadening 0.5 Hz  
FT size 65536  
Total time 9 min, 51 sec

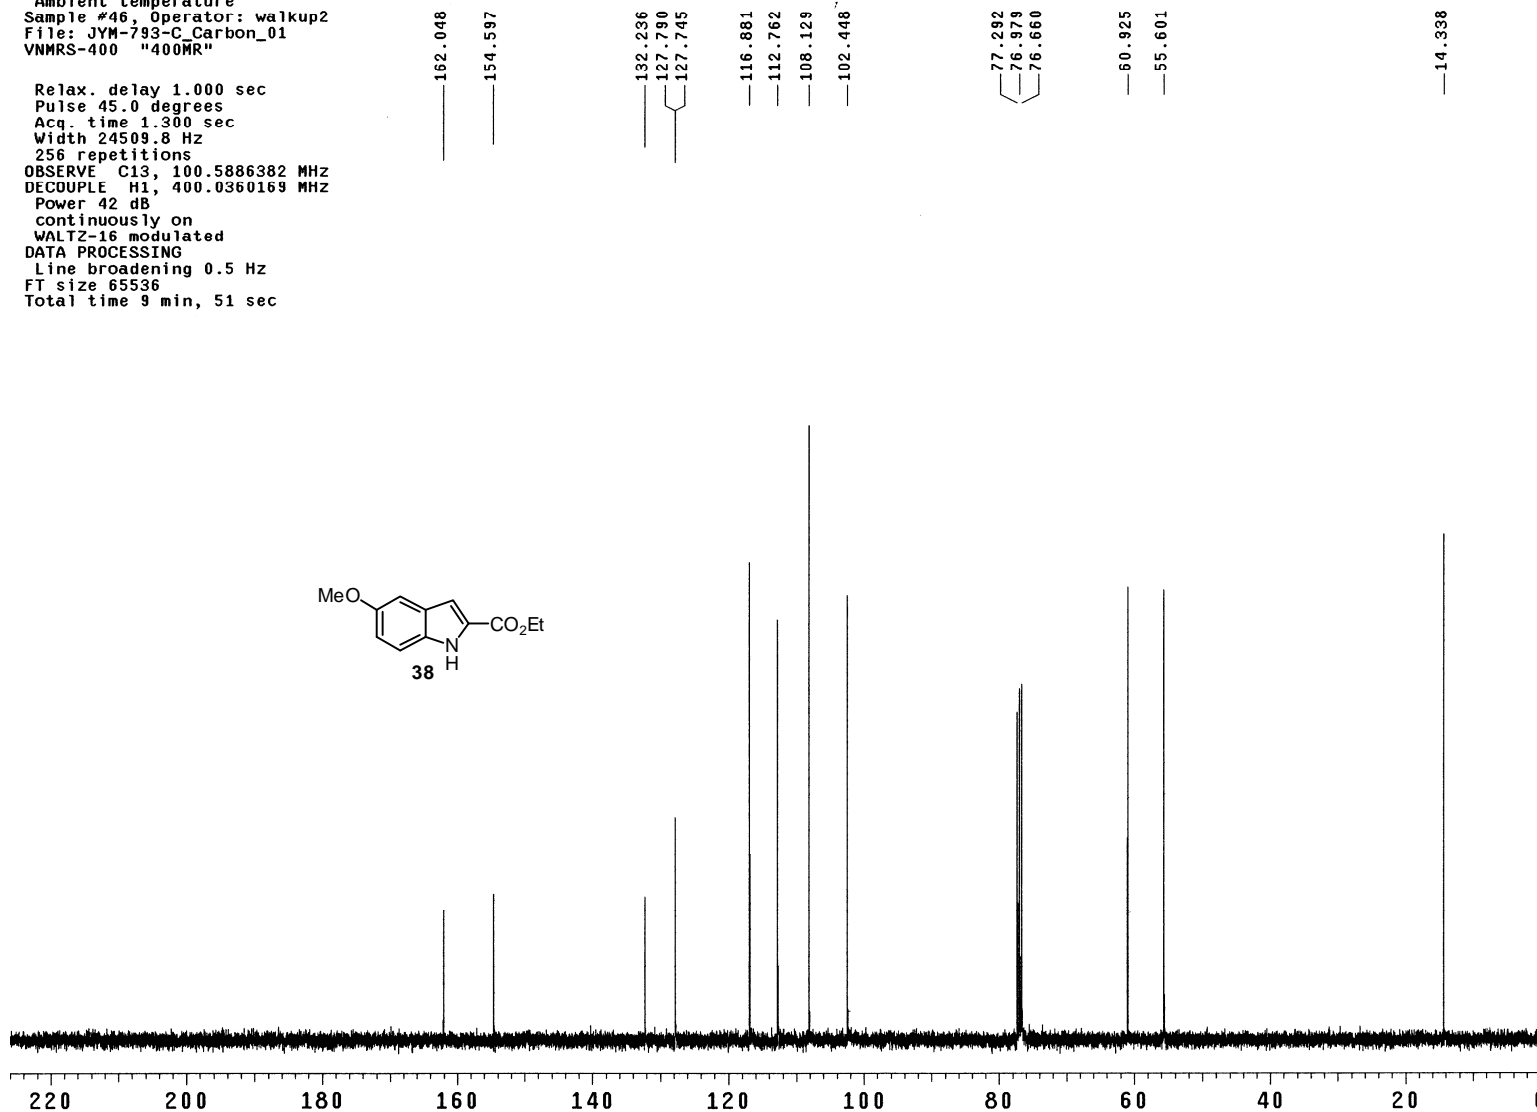

JYM-727

Sample: JYM-727  
Sample ID: s\_44\_JYM-727\_koo-4\_20130716\_01  
File: /home/walkup2/vnmrSYS/data/koo-4/JYM-727\_Proton\_01.fid

Pulse Sequence: s2pu1

Solvent: cdCl3  
Ambient temperature  
Sample #44, Operator: walkup2  
File: JYM-727\_Proton\_01  
VNMR-400 "400MR"

Relax. delay 1.000 sec  
Pulse 45.0 degrees  
Acq. time 2.049 sec  
Width 6410.3 Hz  
3 repetitions  
OBSERVE H1, 400.034066 MHz  
DATA PROCESSING  
Line broadening 0.5 Hz  
FT size 65536  
Total time 0 min, 31 sec

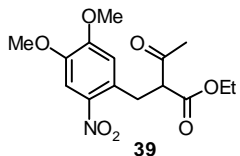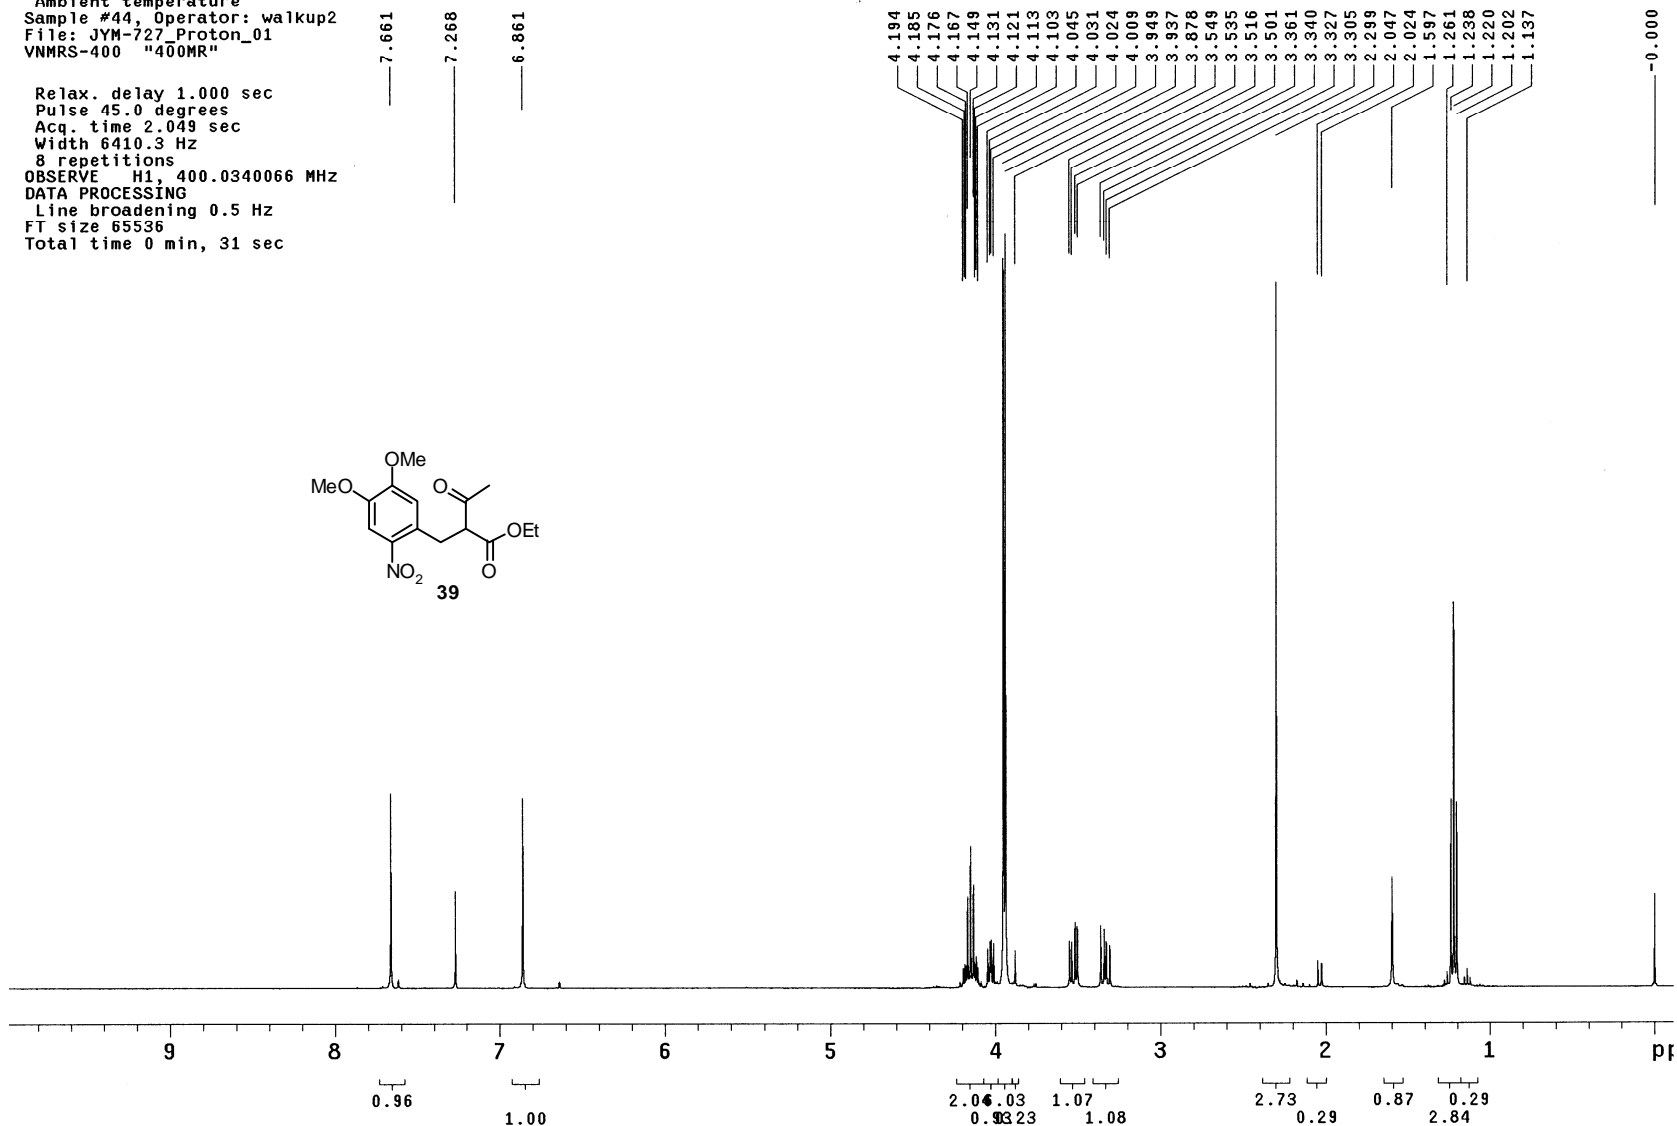

JYM-727-C

Sample: JYM-727-C

Sample ID: s\_45\_JYM-727-C\_koo-4\_20130716\_01

File: /home/walkup2/vnmrSYS/data/koo-4/JYM-727-C\_Carbon\_01.fid

Pulse Sequence: s2pu1

Solvent: cdcl3  
Ambient temperature  
Sample #45, Operator: walkup2  
File: JYM-727-C\_Carbon\_01  
VNMR-400 "400MR"

Relax. delay 1.000 sec  
Pulse 45.0 degrees  
Acq. time 1.300 sec  
Width 24509.8 Hz  
128 repetitions  
OBSERVE C13, 100.5886414 MHz  
DECOUPLE H1, 400.0360169 MHz  
Power 42 dB  
continuously on  
WALTZ-16 modulated  
DATA PROCESSING  
Line broadening 0.5 Hz  
FT size 65536  
Total time 4 min, 56 sec

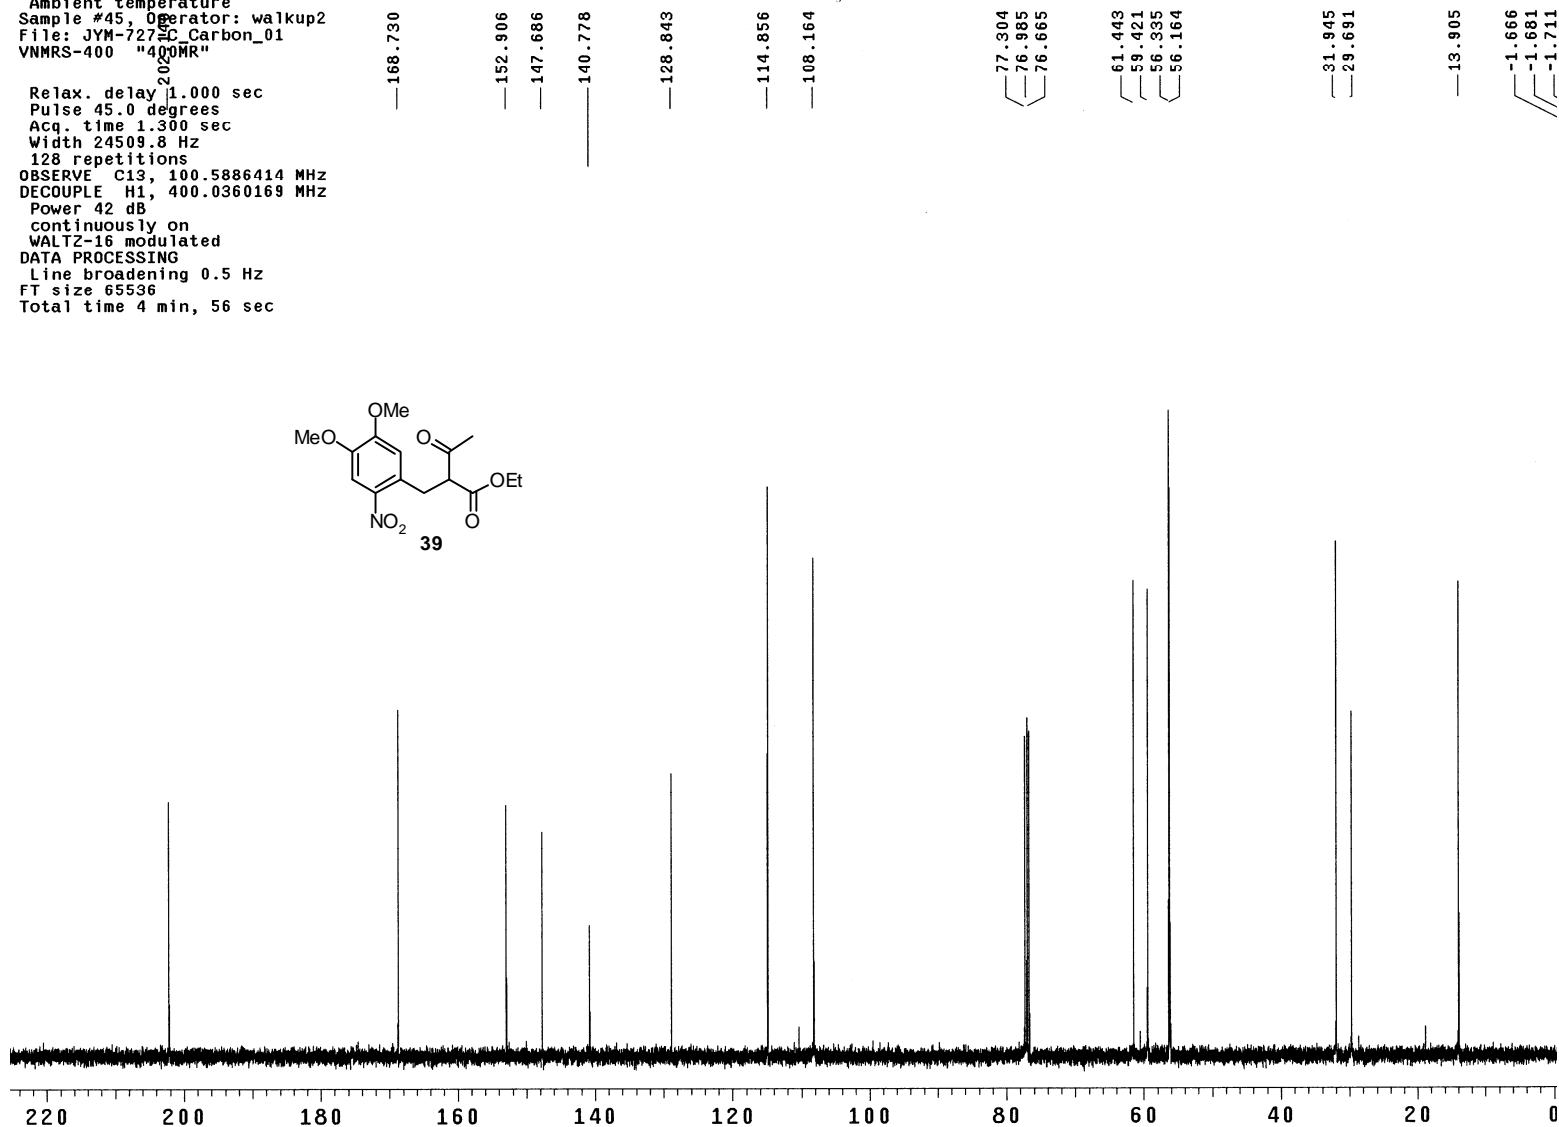

JYM-777-2

Sample: JYM-777-2

Sample ID: s\_50\_JYM-777-2\_koo-4\_20130809\_01

File: /home/walkup2/vnmr/ys/data/koo-4/JYM-777-2\_Proton\_01.fid

Pulse Sequence: s2pu1

Solvent: cdc13

Ambient temperature

Sample #50, Operator: walkup2

File: JYM-777-2\_Proton\_01

VNMRS-400 "400MR"

Relax. delay 1.000 sec

Pulse 45.0 degrees

Acq. time 2.049 sec

Width 6410.3 Hz

8 repetitions

OBSERVE H1, 400.0340052 MHz

DATA PROCESSING

Line broadening 0.5 Hz

FT size 65536

Total time 0 min, 31 sec

7.770  
7.485  
7.270  
6.886  
6.696

4.488  
4.422  
4.404  
4.386  
4.368  
4.256  
4.252  
4.238  
4.234  
4.216  
3.977  
3.965  
3.948  
3.927  
3.920  
3.861  
3.845  
3.717  
3.681

2.262  
1.664  
1.426  
1.408  
1.390  
1.303  
1.285  
1.268

0.000

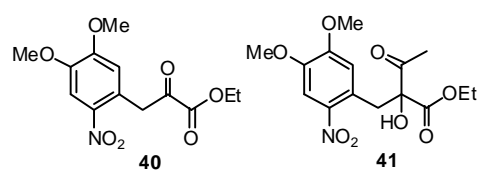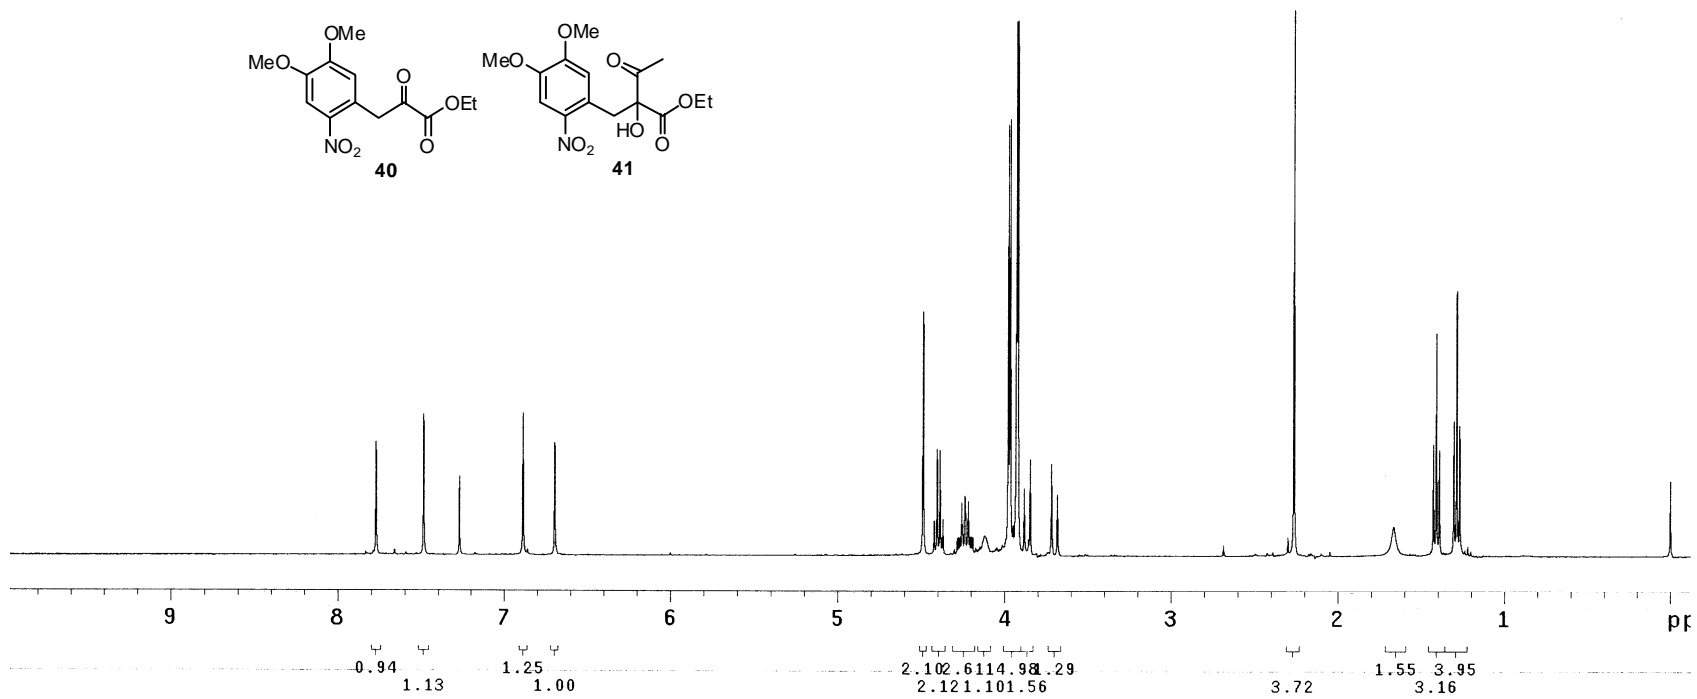

JYM-777-2-c

Sample: JYM-777-2-c  
Sample ID: s\_49\_JYM-777-2-c\_koo-4\_20130809\_01  
File: /home/walkup2/vnmrsys/data/koo-4/JYM-777-2-c\_Carbon\_01.fid

Pulse Sequence: s2pu1

Solvent: cdc13  
Ambient temperature  
Sample #49, Operator: walkup2  
File: JYM-777-2-c\_Carbon\_01  
VNMR-400 "400MR"

Relax. delay 1.000 sec  
Pulse 45.0 degrees  
Acq. time 1.300 sec  
Width 24509.8 Hz  
512 repetitions  
OBSERVE C13, 100.5886331 MHz  
DECOUPLE H1, 400.0360169 MHz  
Power 42 dB  
continuously on  
WALTZ-16 modulated  
DATA PROCESSING  
Line broadening 0.5 Hz  
FT size 65536  
Total time 19 min, 42 sec

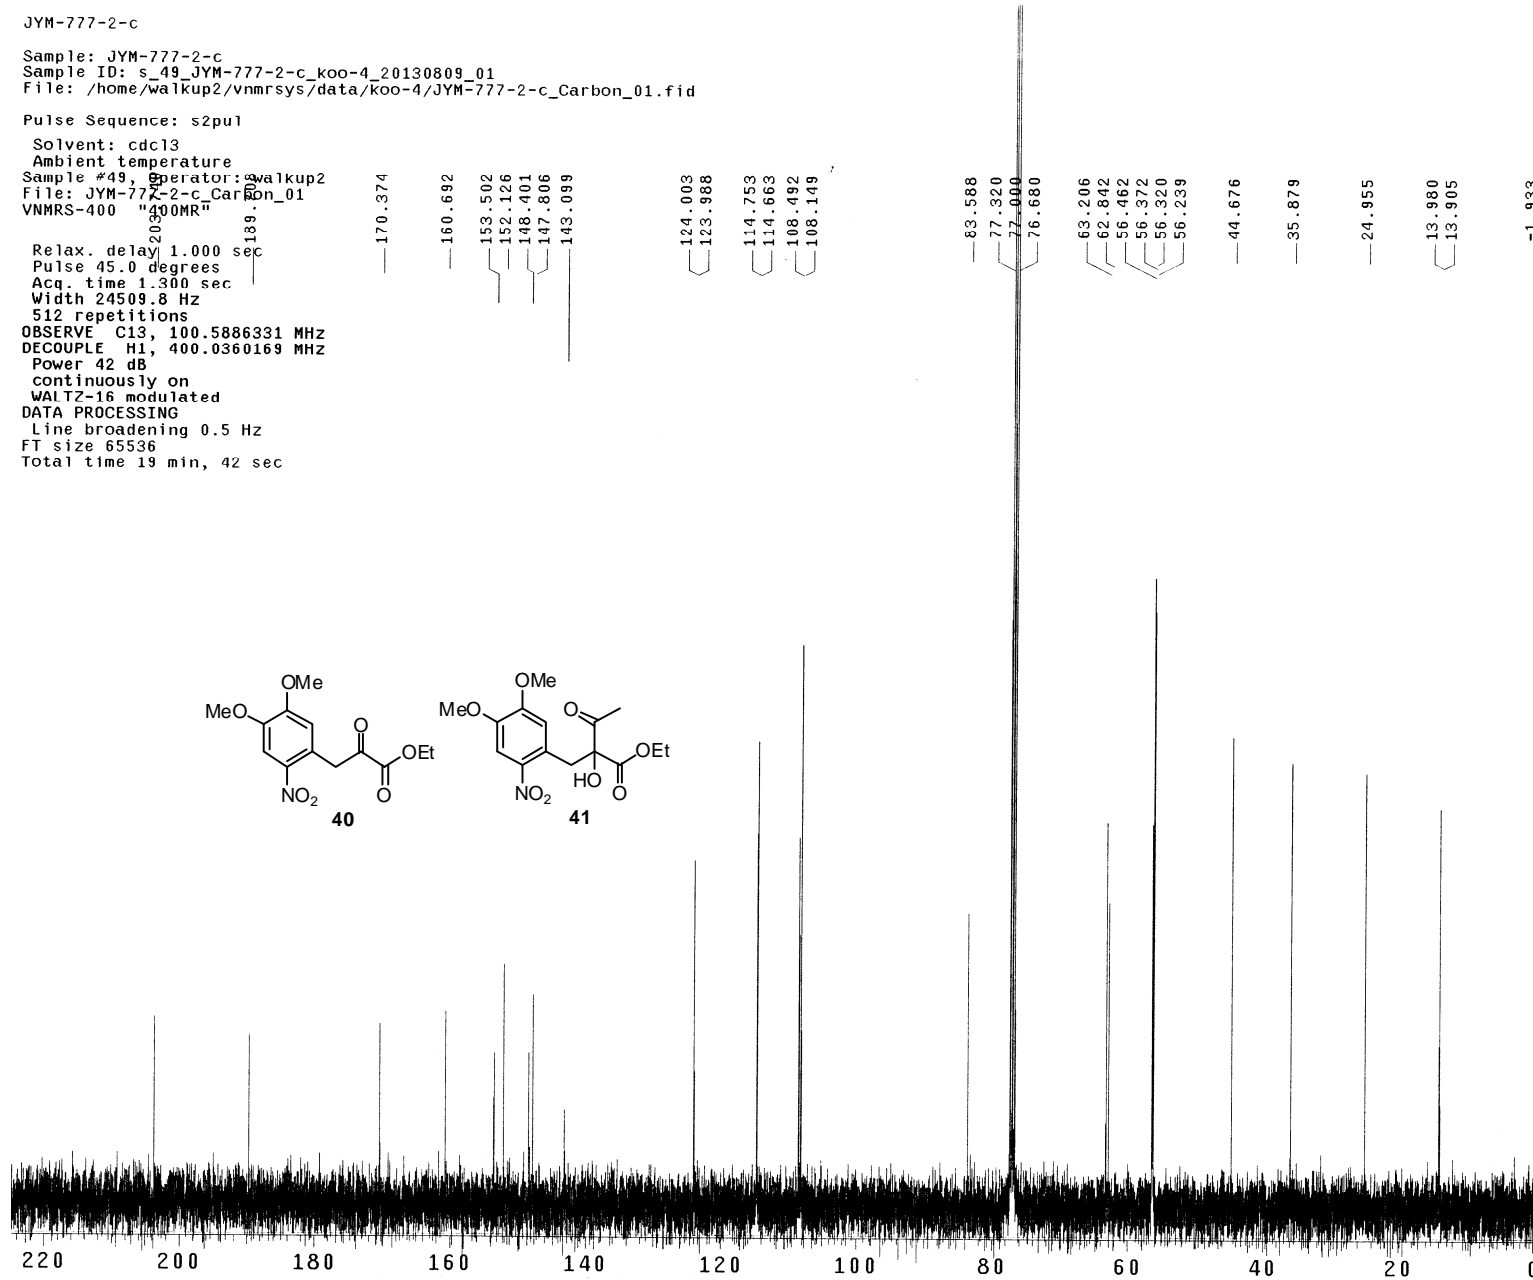

JYM-782-1

Sample: JYM-782-1

Sample ID: s\_46\_JYM-782-1\_koo-4\_20130812\_01

File: /home/walkup2/vnmrsys/data/koo-4/JYM-782-1\_Proton\_01.fid

Pulse Sequence: s2pul

Solvent: cdcl3

Ambient temperature

Sample #46, Operator: walkup2

File: JYM-782-1\_Proton\_01

VNMR-400 "400MR"

Relax. delay 1.000 sec

Pulse 45.0 degrees

Acq. time 2.049 sec

Width 6410.3 Hz

8 repetitions

OBSERVE H1, 400.0340088 MHz

DATA PROCESSING

Line broadening 0.5 Hz

FT size 65536

Total time 0 min, 31 sec

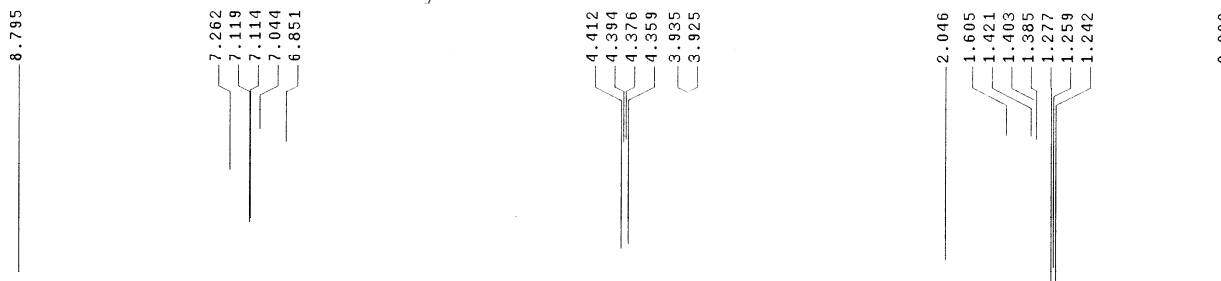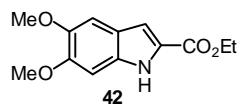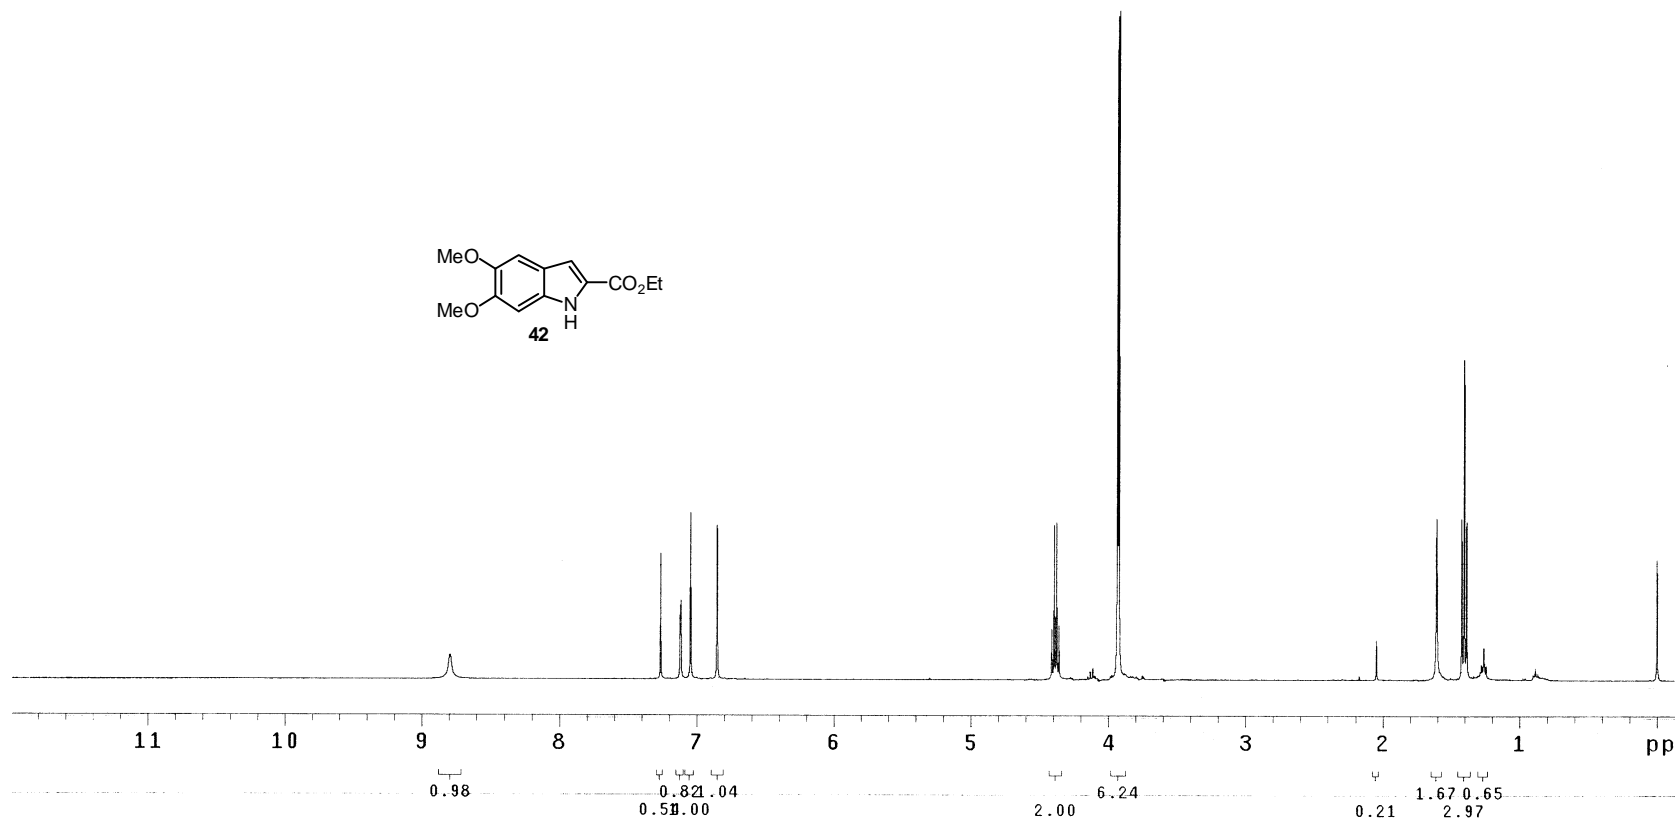

JYM-782-1-C

Sample: JYM-782-1-C

Sample ID: s\_45\_JYM-782-1-C\_koo-4\_20130812\_01

File: /home/walkup2/vnmrsvs/data/koo-4/JYM-782-1-C\_Carbon\_01.fid

Pulse Sequence: s2pu1

Solvent: cdcl3  
Ambient temperature  
Sample #45, Operator: walkup2  
File: JYM-782-1-C\_Carbon\_01  
VNMRS-400 "400MR"

Relax. delay 1.000 sec  
Pulse 45.0 degrees  
Acq. time 1.300 sec  
Width 24509.8 Hz  
512 repetitions  
OBSERVE C13, 100.5886325 MHz  
DECOUPLE H1, 400.0360169 MHz  
Power 42 dB  
continuously on  
WALTZ-16 modulated  
DATA PROCESSING  
Line broadening 0.5 Hz  
FT size 65536  
Total time 19 min, 42 sec

161.873  
150.028  
146.139  
131.965  
125.950  
120.425  
108.661  
102.511  
93.744  
77.318  
76.998  
76.679  
60.684  
56.125  
56.014  
14.439

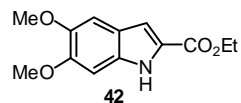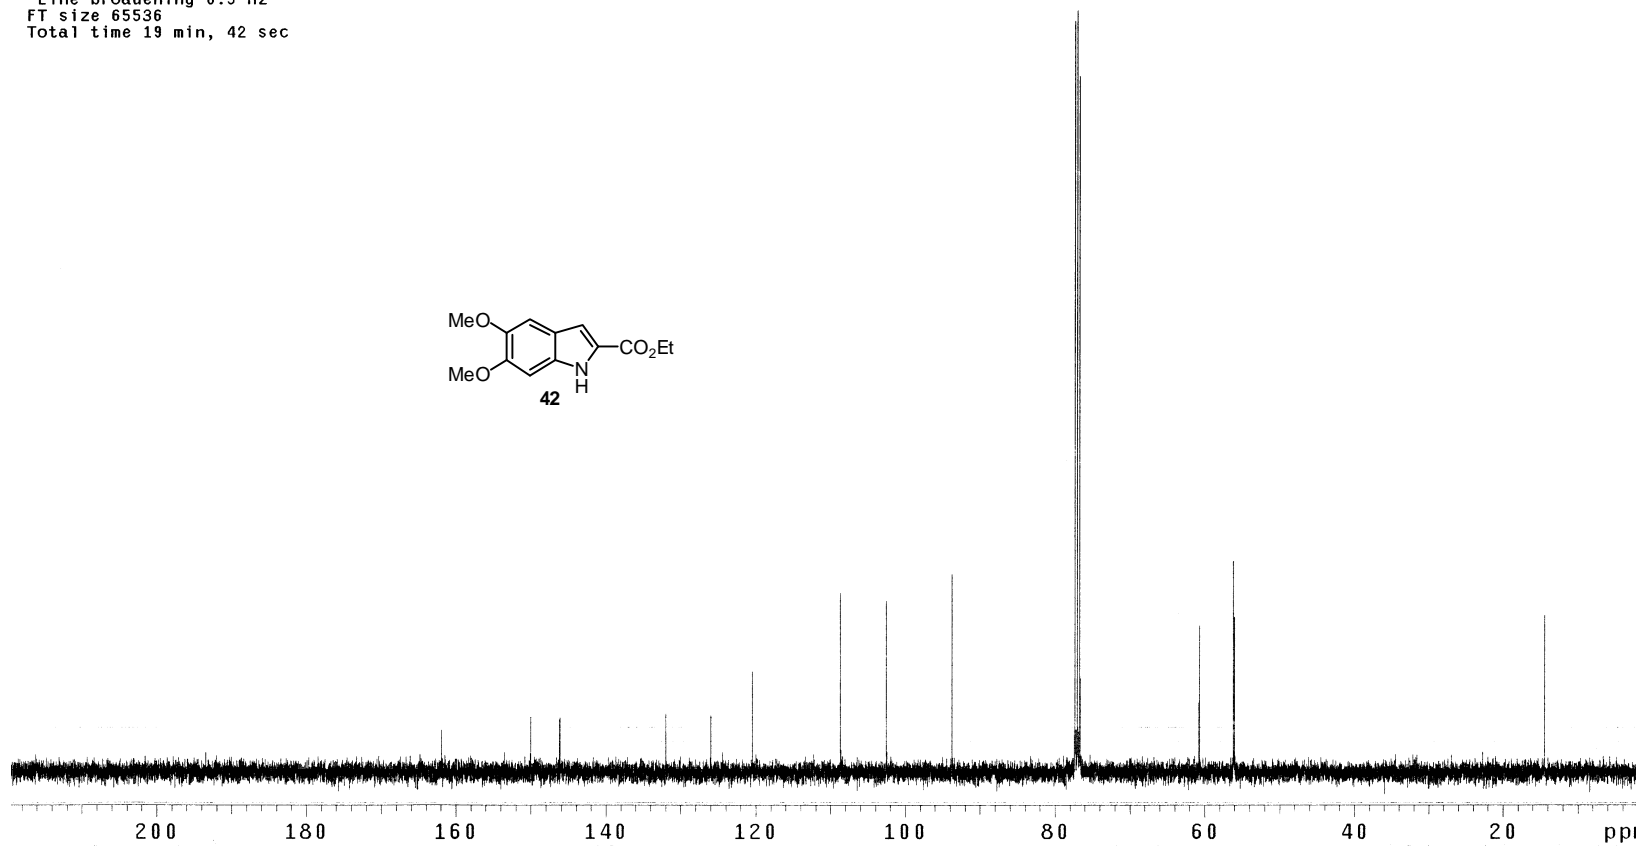



JYM-729

Sample: JYM-729  
Sample ID: s\_48\_JYM-729\_koo-4\_20130717\_01  
File: /home/walkup2/vnmrfsys/data/koo-4/JYM-729\_Proton\_01.fid

Pulse Sequence: s2pu1  
Solvent: cdc13  
Ambient temperature  
Sample #48, Operator: walkup2  
File: JYM-729\_Proton\_01  
VNMR-400 "400MR"

Relax. delay 1.000 sec  
Pulse 45.0 degrees  
Acq. time 2.049 sec  
Width 6410.3 Hz  
8 repetitions  
OBSERVE H1, 400.0340082 MHz  
DATA PROCESSING  
Line broadening 0.5 Hz  
FT size 65536  
Total time 0 min, 31 sec

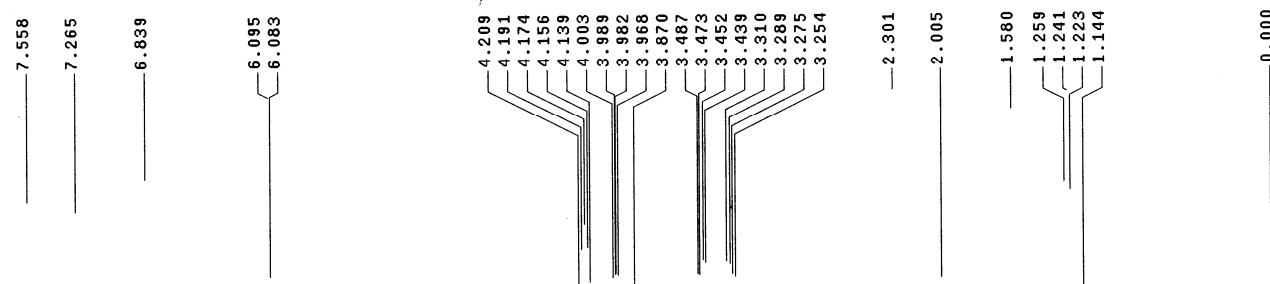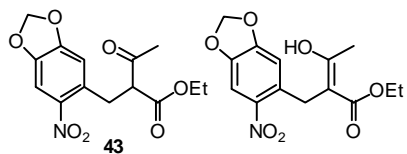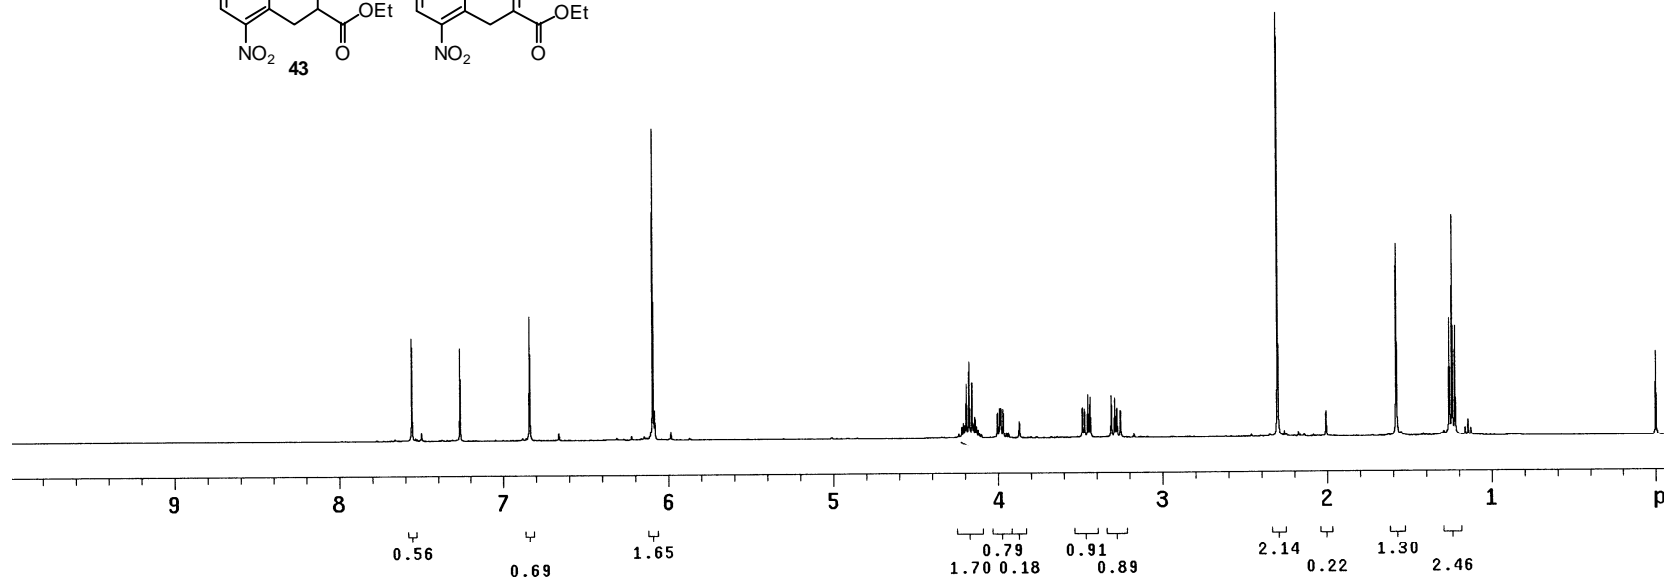

JYM-729-C

Sample: JYM-729-C

Sample ID: s\_46\_JYM-729-C\_koo-4\_20130717\_01

File: /home/walkup2/vnmrSYS/data/koo-4/JYM-729-C\_Carbon\_01.fid

Pulse Sequence: s2pu1

Solvent: cdcl3  
Ambient temperature  
Sample #46, Operator: walkup2  
File: JYM-729-C\_Carbon\_01  
VNMR-400 "400PMR"

Relax. delay 1.000 sec  
Pulse 45.0 degrees  
Acq. time 1.300 sec  
Width 24509.8 Hz  
128 repetitions  
OBSERVE C13, 100.5886368 MHz  
DECOUPLE H1, 400.0360169 MHz  
Power 42 dB  
continuously on  
WALTZ-16 modulated  
DATA PROCESSING  
Line broadening 0.5 Hz  
FT size 65536  
Total time 4 min, 56 sec

168.650

151.785

147.078

142.624

130.994

112.054

105.860

102.945

102.714

77.313

77.001

76.681

61.601

59.615

32.013

29.670

13.958

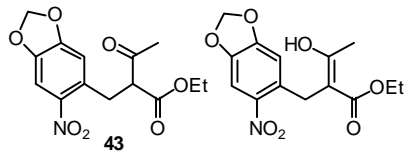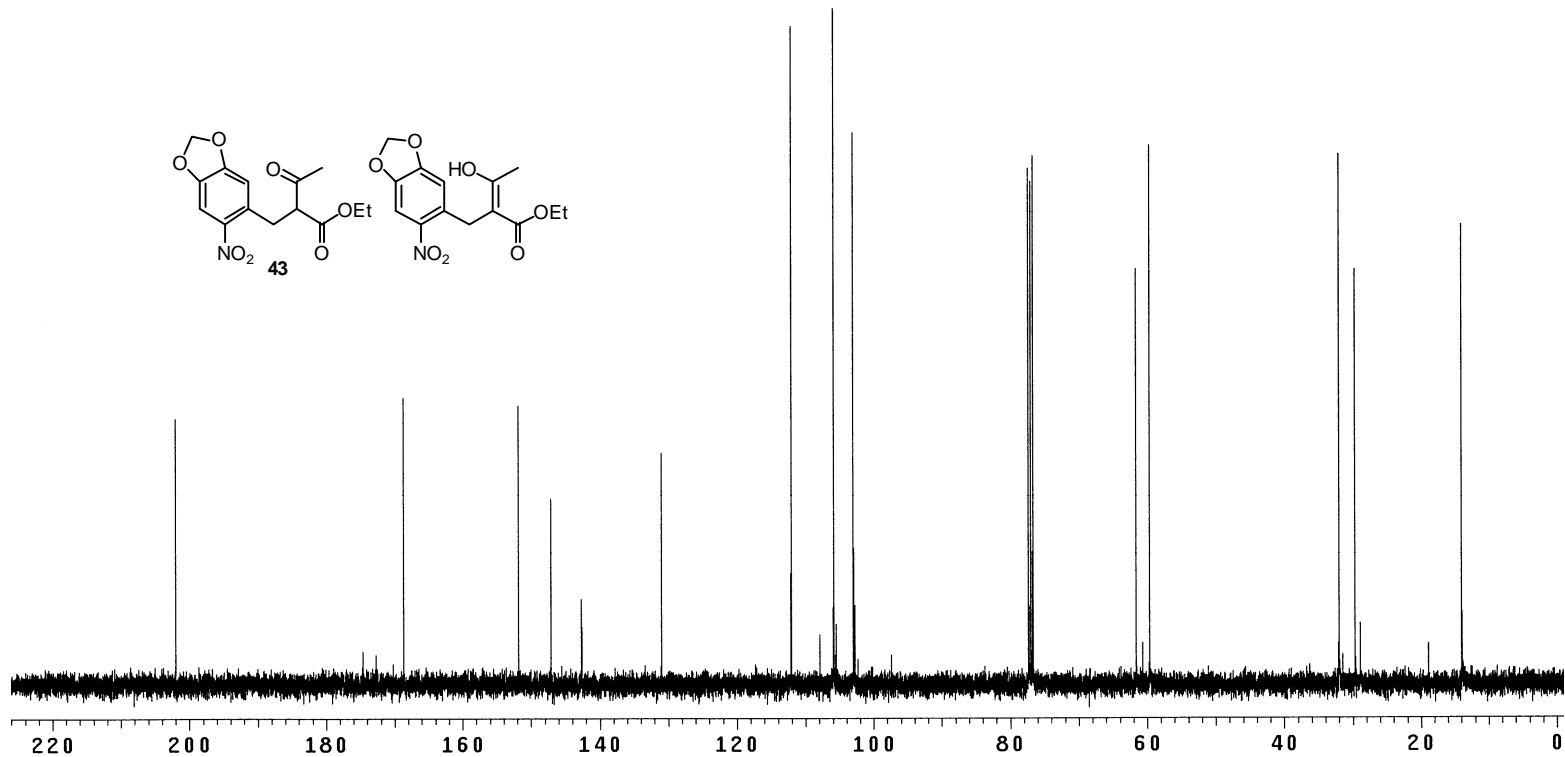

Sample: JYM-778-3  
 Sample ID: s\_45\_JYM-778-3\_koo-4\_20130812\_01  
 File: /home/walkup2/vnmr/sys/data/koo-4/JYM-778-3\_Proton\_01.fid

Pulse Sequence: s2pu1

Solvent: cdcl3

Ambient temperature

Sample #45, Operator: walkup

File: JYM-778-3\_Proton\_01.fid

VNMRS-400 "400MR"

Relax. delay 1.000 sec

Pulse 45.0 degrees

Acq. time 2.049 sec

Width 6410.3 Hz

8 repetitions

OBSERVE H1, 400.0340068 MHz

DATA PROCESSING

Line broadening 0.5 Hz

FT size 65536

Total time 0 min, 31 sec

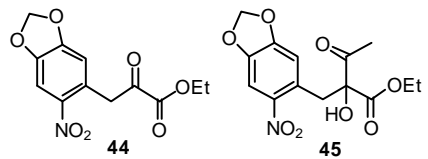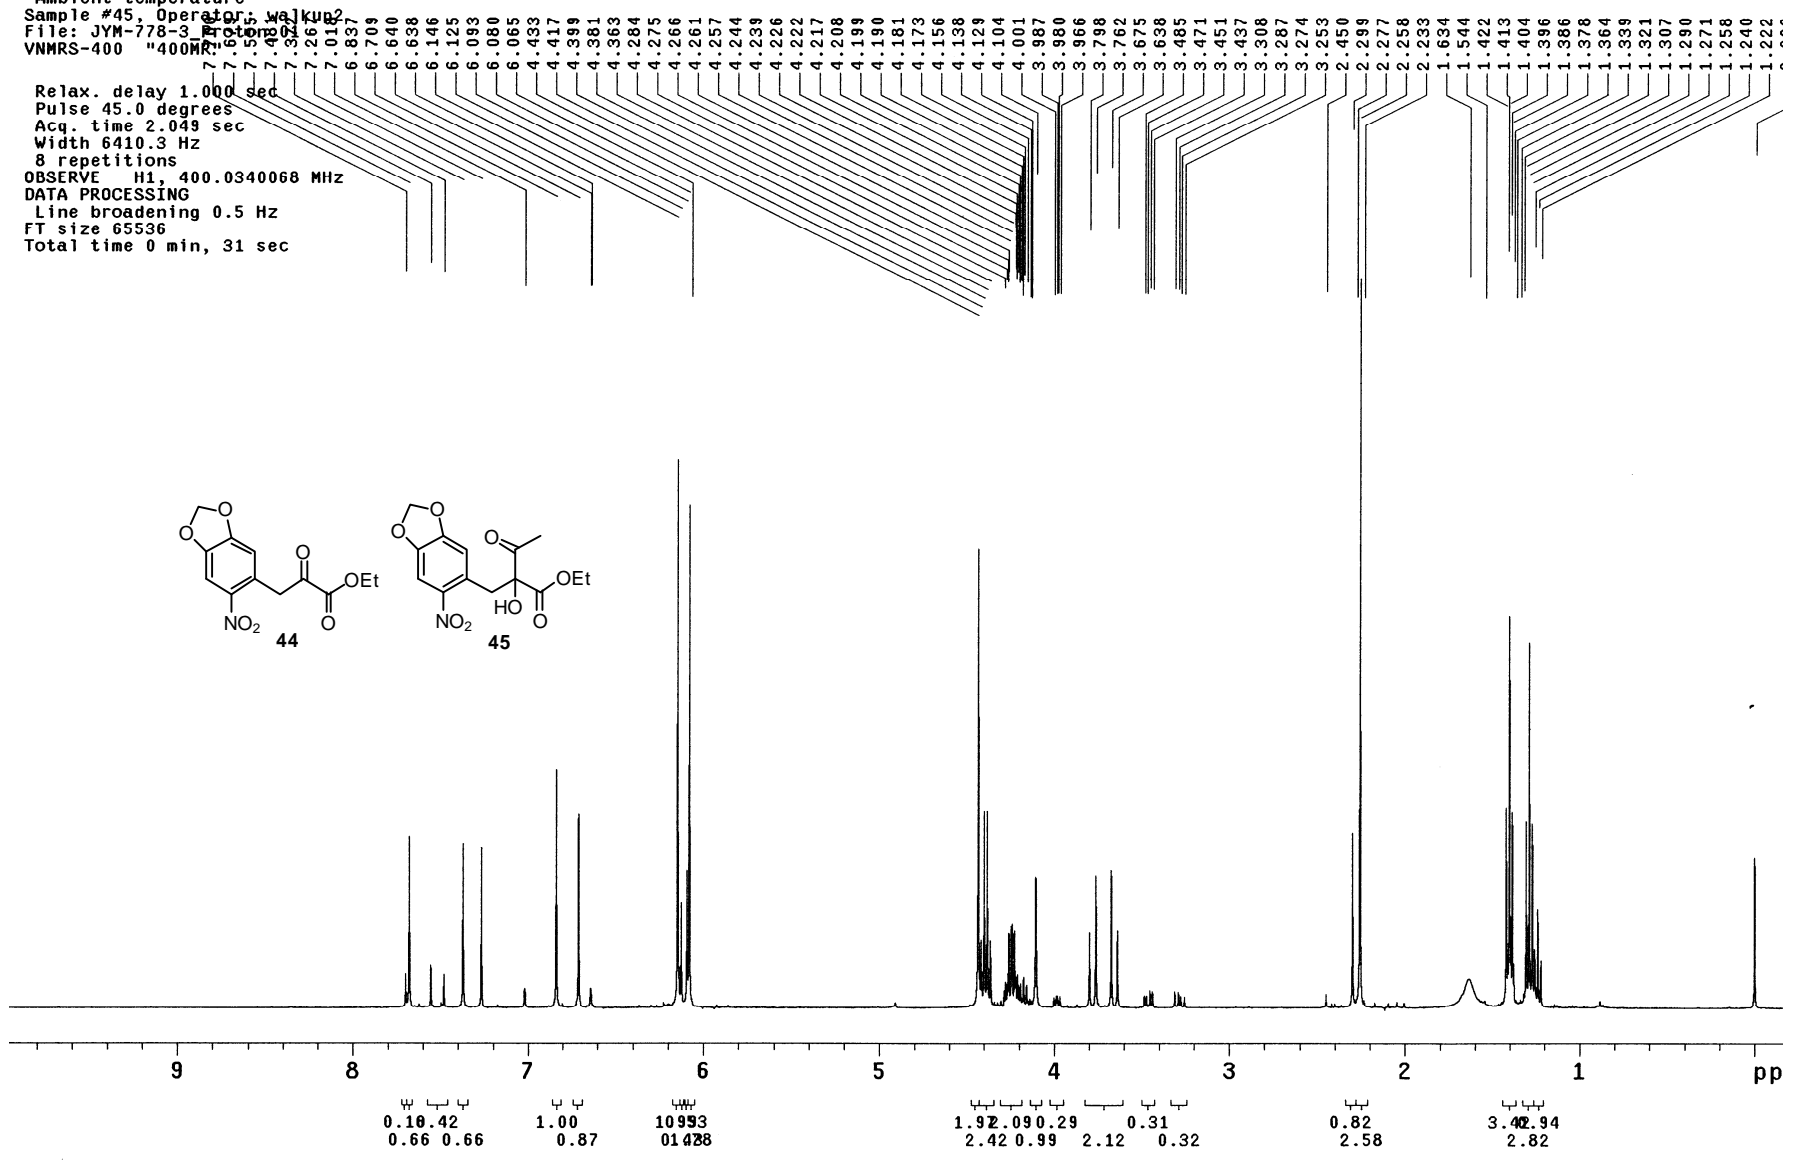

Sample: JYM-778-3-C  
 Sample ID: s\_46\_JYM-778-3-C\_koo-4\_20130814\_01  
 File: /home/walkup2/vnmrsys/data/koo-4/JYM-778-3-C\_Carbon\_01.fid

Pulse Sequence: s2pu1  
 Solvent: cdc13  
 Ambient temperature  
 Sample #46 Operator: walkup2  
 File: JYM-778-3-C\_Carbon\_01  
 VNMRS-400 "400MR"

Relax. delay 1.000 sec  
 Pulse 45.0 degrees  
 Acq. time 1.300 sec  
 Width 24509.8 Hz  
 512 repetitions  
 OBSERVE C13, 100.5886345 MHz  
 DECOUPLE H1, 400.0360169 MHz  
 Power 42 dB  
 continuously on  
 WALTZ-16 modulated  
 DATA PROCESSING  
 Line broadening 0.5 Hz  
 FT size 65536  
 Total time 19 min, 42 sec

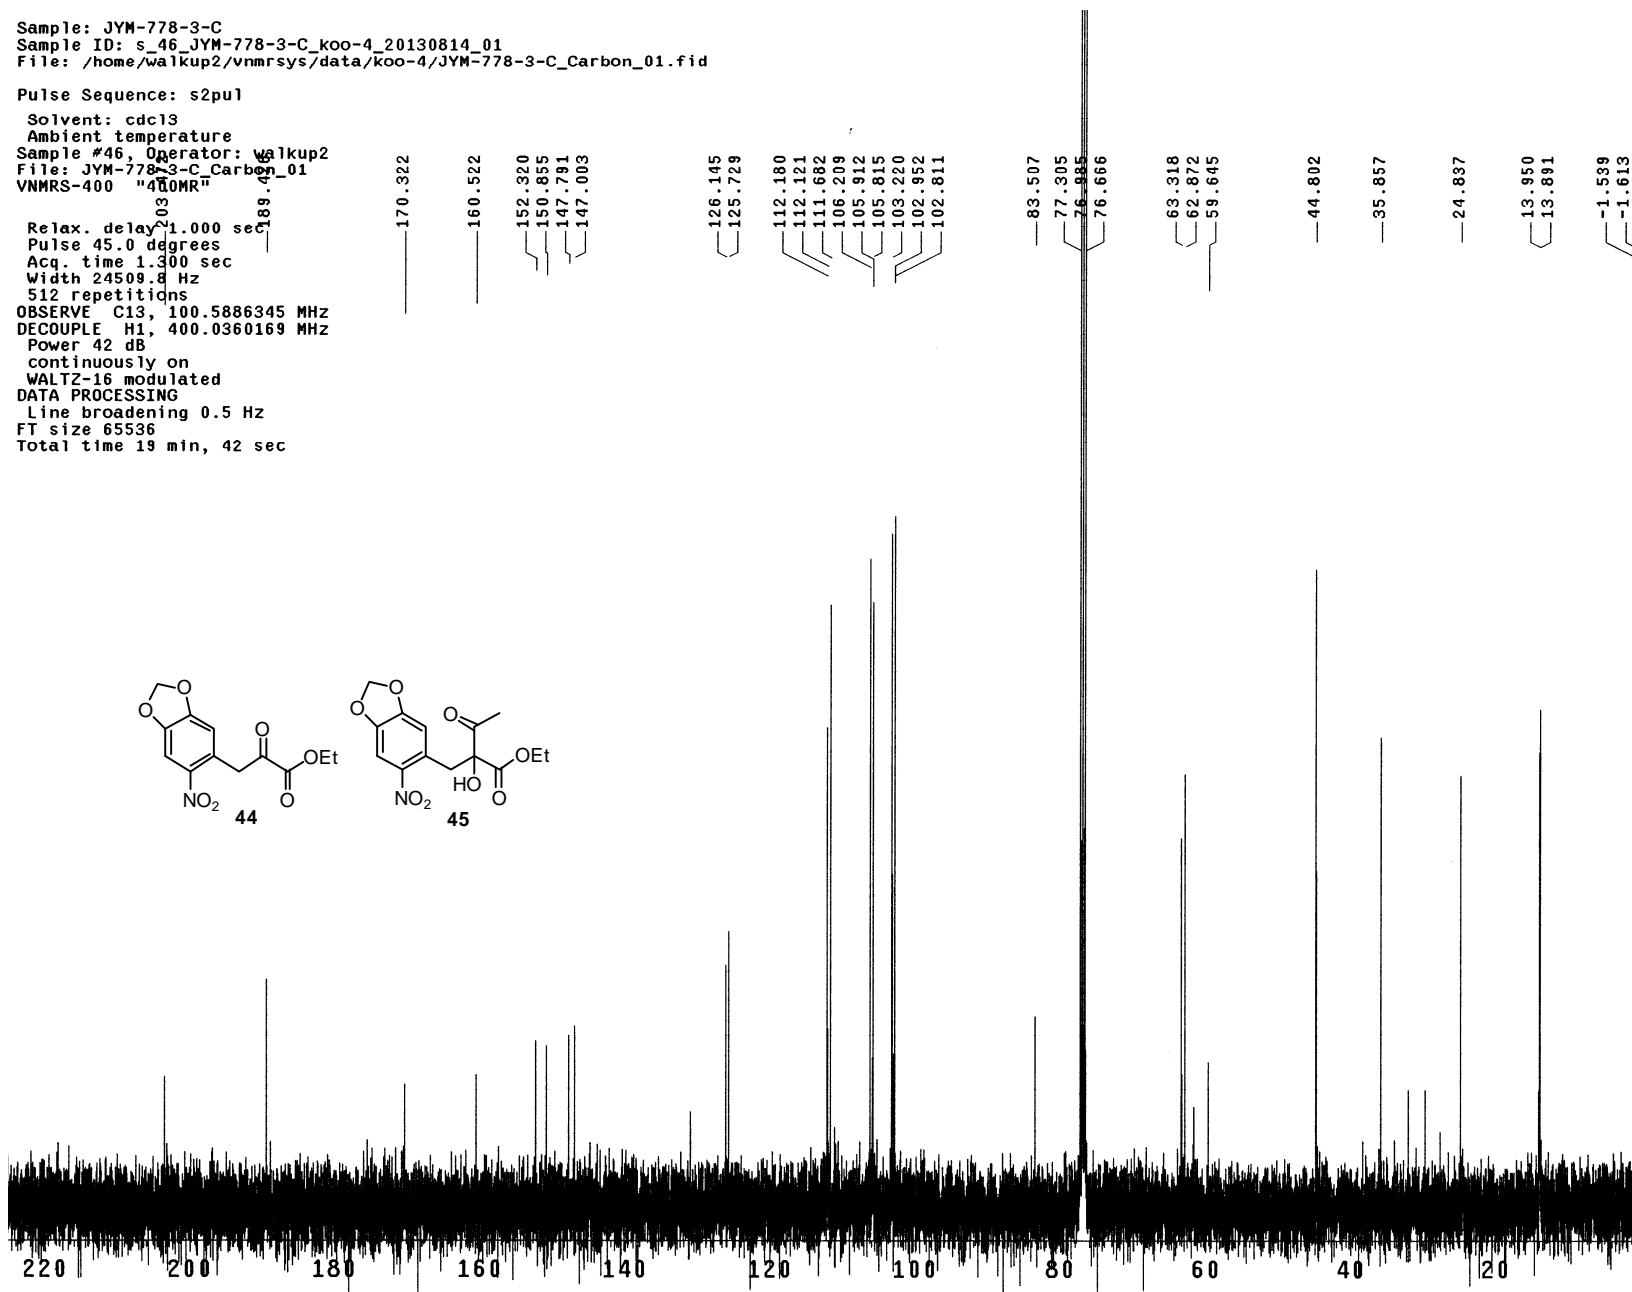

Sample: MD-316  
Sample ID: s\_47\_MD-316\_koo-4\_20140630\_01  
File: /home/walkup2/vnmrsys/data/koo-4/MD-316\_Proton\_01.fid

Pulse Sequence: s2pu1  
Solvent: cdc13  
Ambient temperature  
Sample #47, Operator: walkup2  
File: MD-316\_Proton\_01  
VNMR5-400 "400MR"

Relax. delay 1.000 sec  
Pulse 45.0 degrees  
Acq. time 2.049 sec  
Width 6830.6 Hz  
8 repetitions  
OBSERVE H1, 400.0340087 MHz  
DATA PROCESSING  
Line broadening 0.5 Hz  
FT size 65536  
Total time 0 min, 31 sec

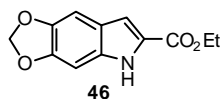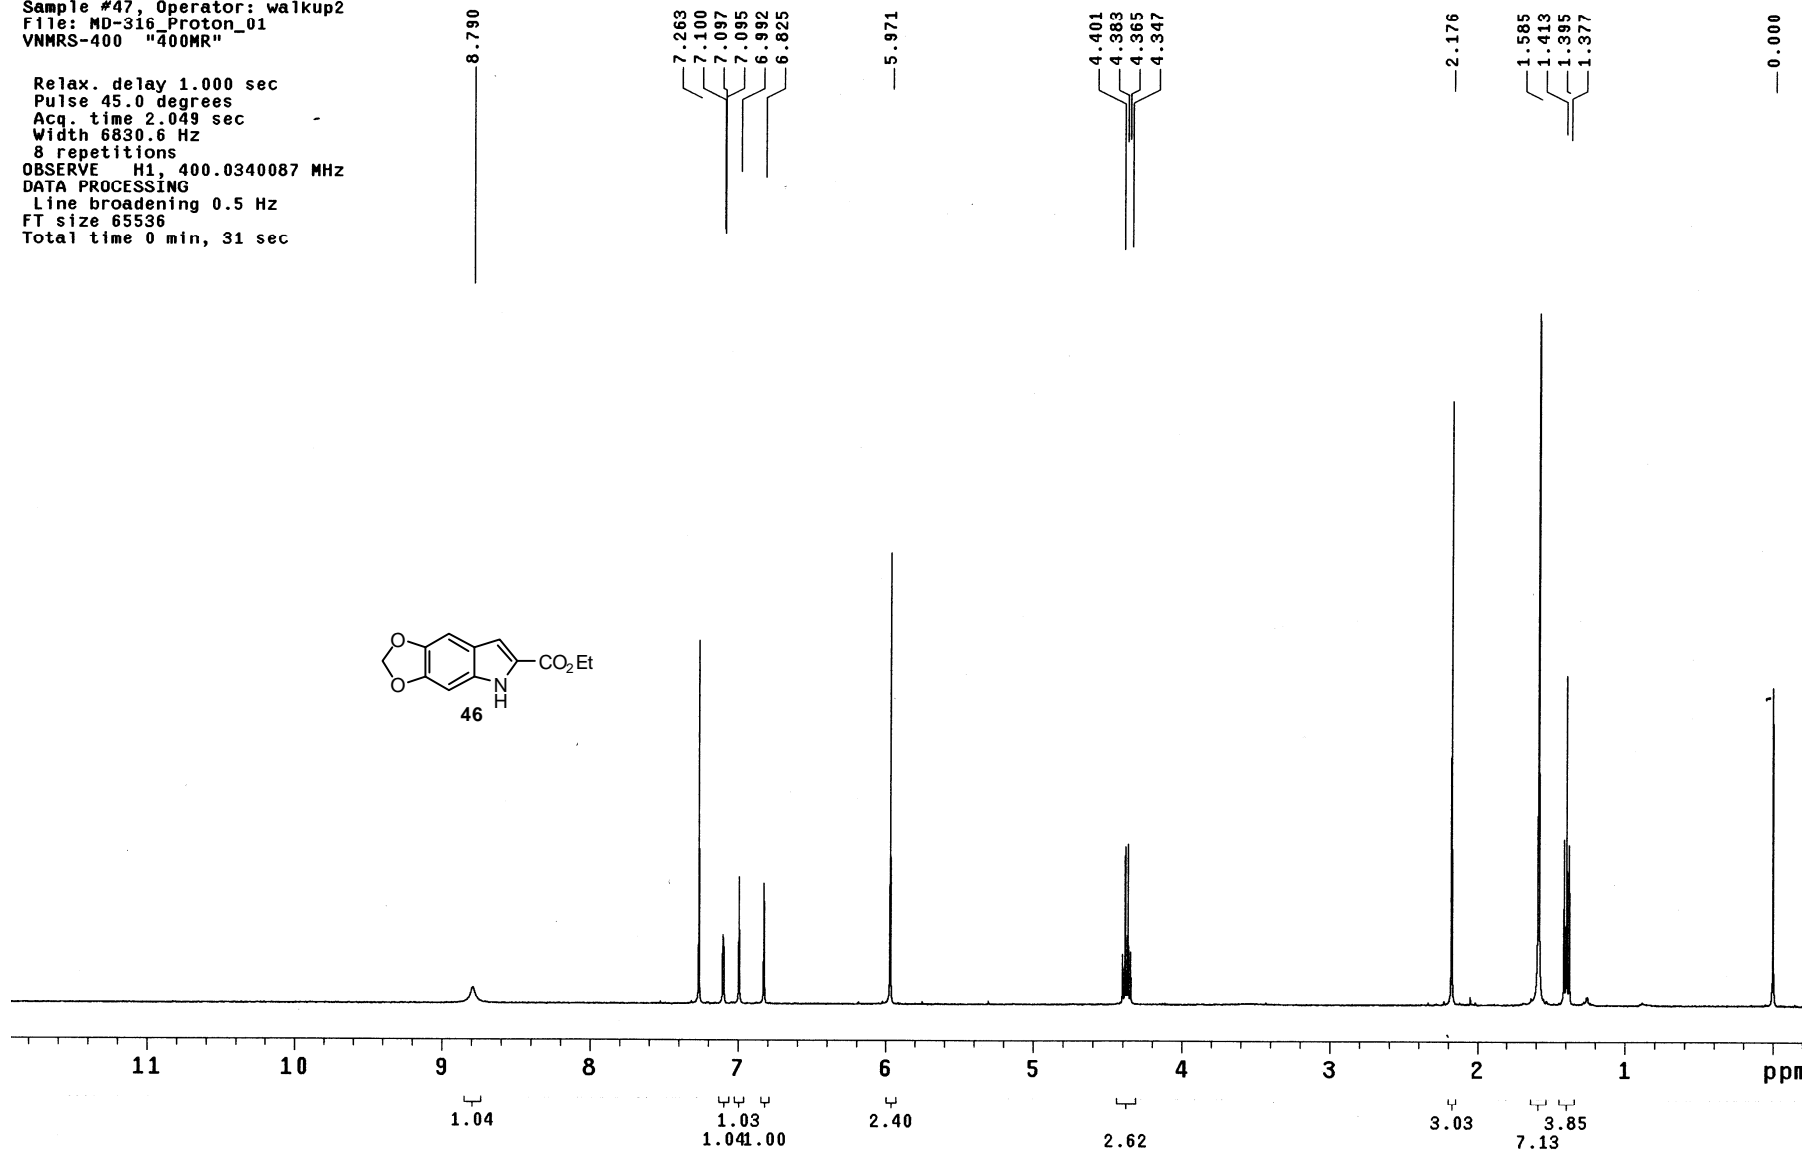

Sample: JYM-784-C  
Sample ID: s\_42\_JYM-784-C\_koo-2\_20130813\_01  
File: /home/walkup2/vnmrSYS/data/koo-2/JYM-784-C\_Carbon\_01.fid

Pulse Sequence: s2pu1  
Solvent: cdc13  
Ambient temperature  
Sample #42, Operator: walkup2  
File: JYM-784-C\_Carbon\_01  
VNMR5-400 "400MR"

Relax. delay 1.000 sec  
Pulse 45.0 degrees  
Acq. time 1.300 sec  
Width 24509.8 Hz  
512 repetitions  
OBSERVE C13, 100.5886331 MHz  
DECOUPLE H1, 400.0360169 MHz  
Power 42 dB  
continuously on  
WALTZ-16 modulated  
DATA PROCESSING  
Line broadening 0.5 Hz  
FT size 65536  
Total time 19 min, 42 sec

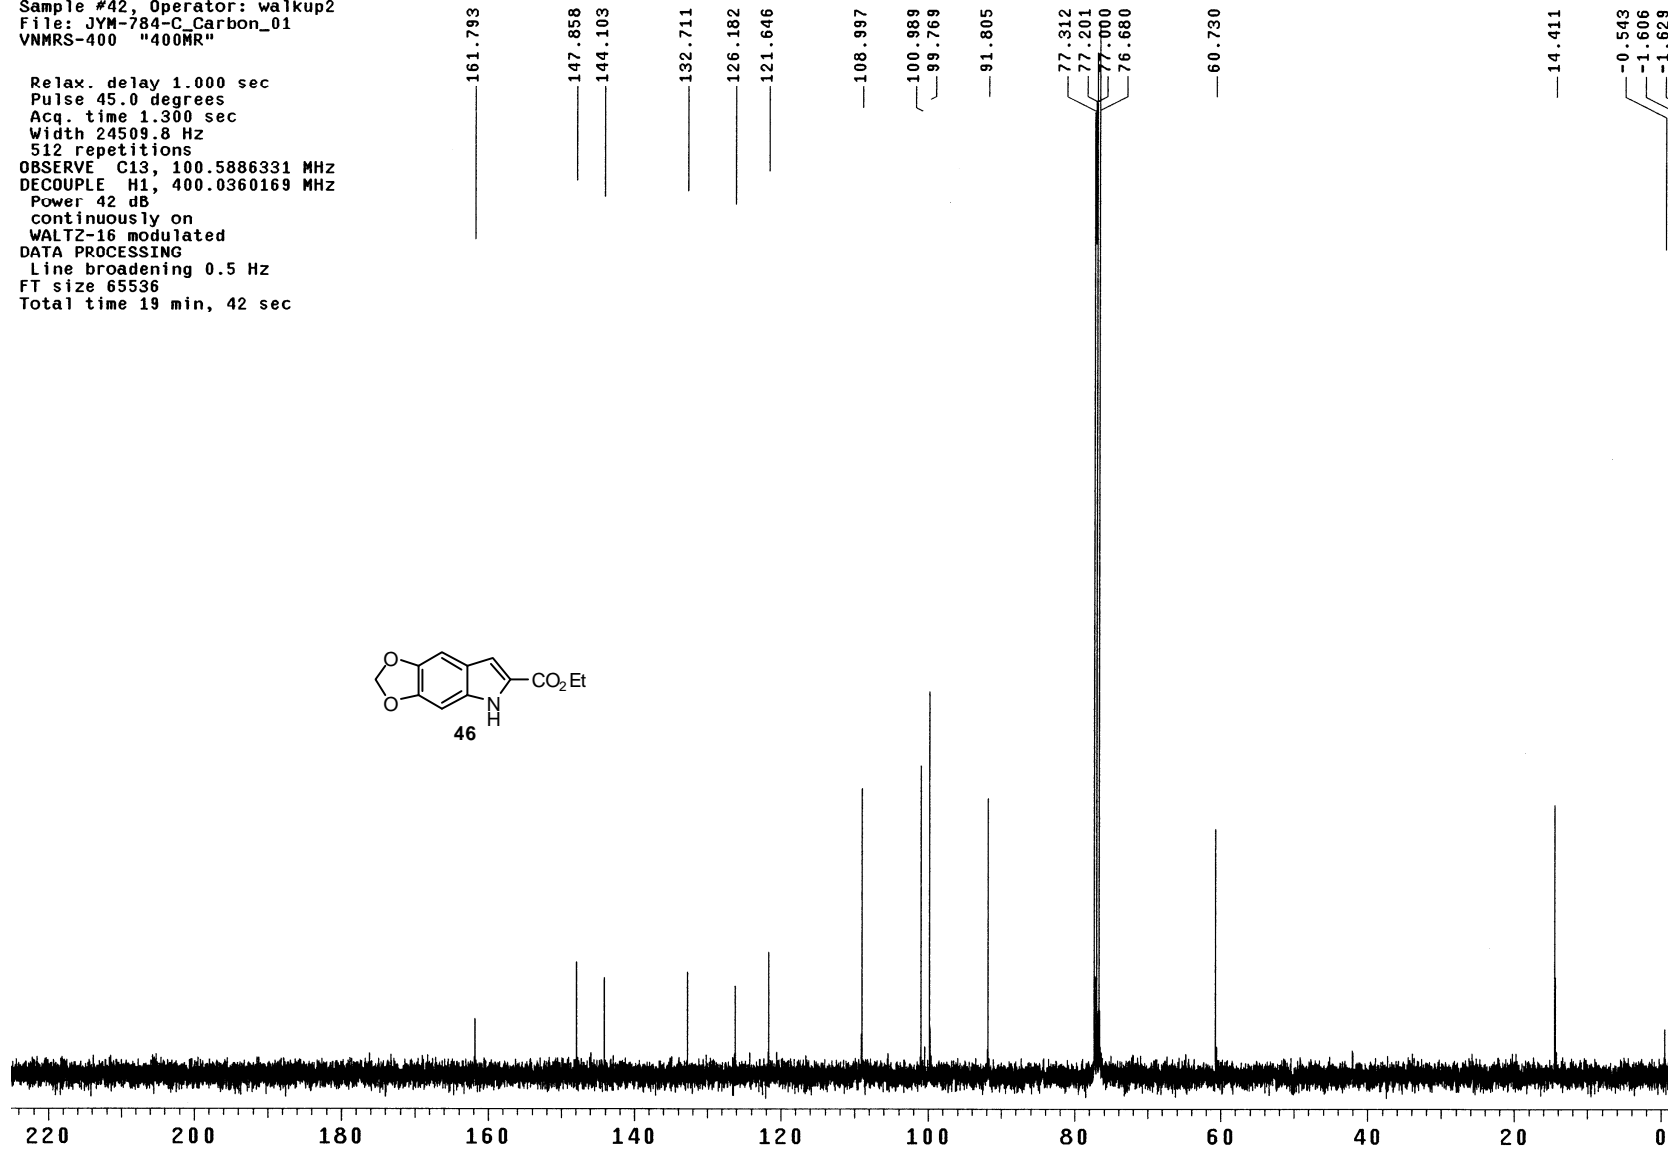

JYM-740

Sample: JYM-740  
Sample ID: s\_46\_JYM-740\_koo-4\_20130722\_01  
File: /home/waikup2/vnmrfsys/data/koo-4/JYM-740\_Proton\_01.fid

Pulse Sequence: s2pu1

Solvent: cdcl3  
Ambient temperature  
Sample #46, Operator: w  
File: JYM-740\_Proton\_01  
VNMR-400 "400MHz"

Relax. delay 1.000 sec  
Pulse 45.0 degrees  
Acq. time 2.049 sec  
Width 6410.3 Hz  
8 repetitions  
OBSERVE H1, 400.0340068 MHz  
DATA PROCESSING  
Line broadening 0.5 Hz  
FT size 65536  
Total time 0 min, 31 sec

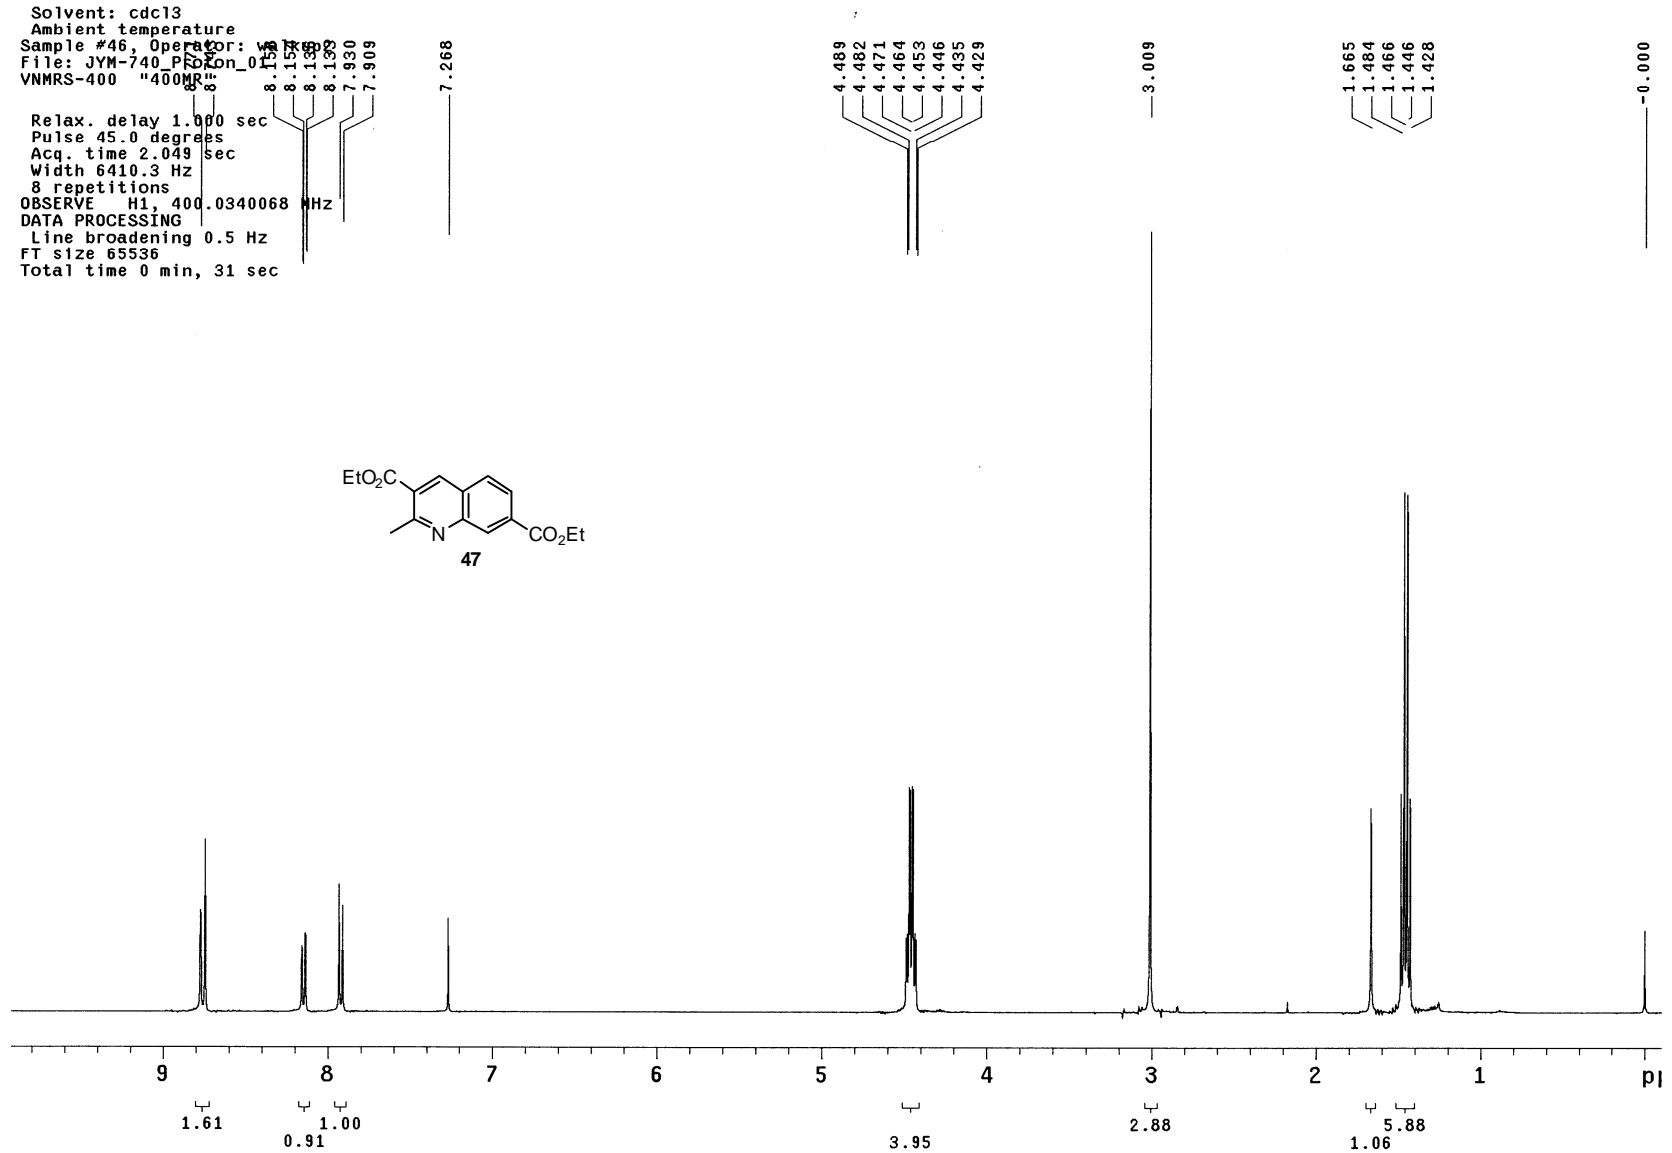

JYM-740-C

Sample: JYM-740-C  
Sample ID: s\_49\_JYM-740-C\_koo-4\_20130722\_01  
File: /home/walkup2/vnmrsys/data/koo-4/JYM-740-C\_Carbon\_01.fid

Pulse Sequence: s2pu1

Solvent: cdc13  
Ambient temperature  
Sample #49, Operator: walkup2  
File: JYM-740-C\_Carbon\_01  
VNMR5-400 "400MR"

Relax. delay 1.000 sec  
Pulse 45.0 degrees  
Acq. time 1.300 sec  
Width 24509.8 Hz  
128 repetitions  
OBSERVE C13, 100.5886335 MHz  
DECOUPLE H1, 400.0360169 MHz  
Power 42 dB  
continuously on  
WALTZ-16 modulated  
DATA PROCESSING  
Line broadening 0.5 Hz  
FT size 65536  
Total time 4 min, 56 sec

166.184  
166.006  
159.306  
147.891  
139.280  
133.064  
130.878  
128.558  
128.060  
125.977  
125.546  
77.316  
77.004  
76.684  
61.596  
61.470  
25.606  
14.244

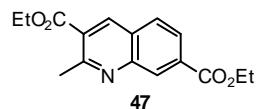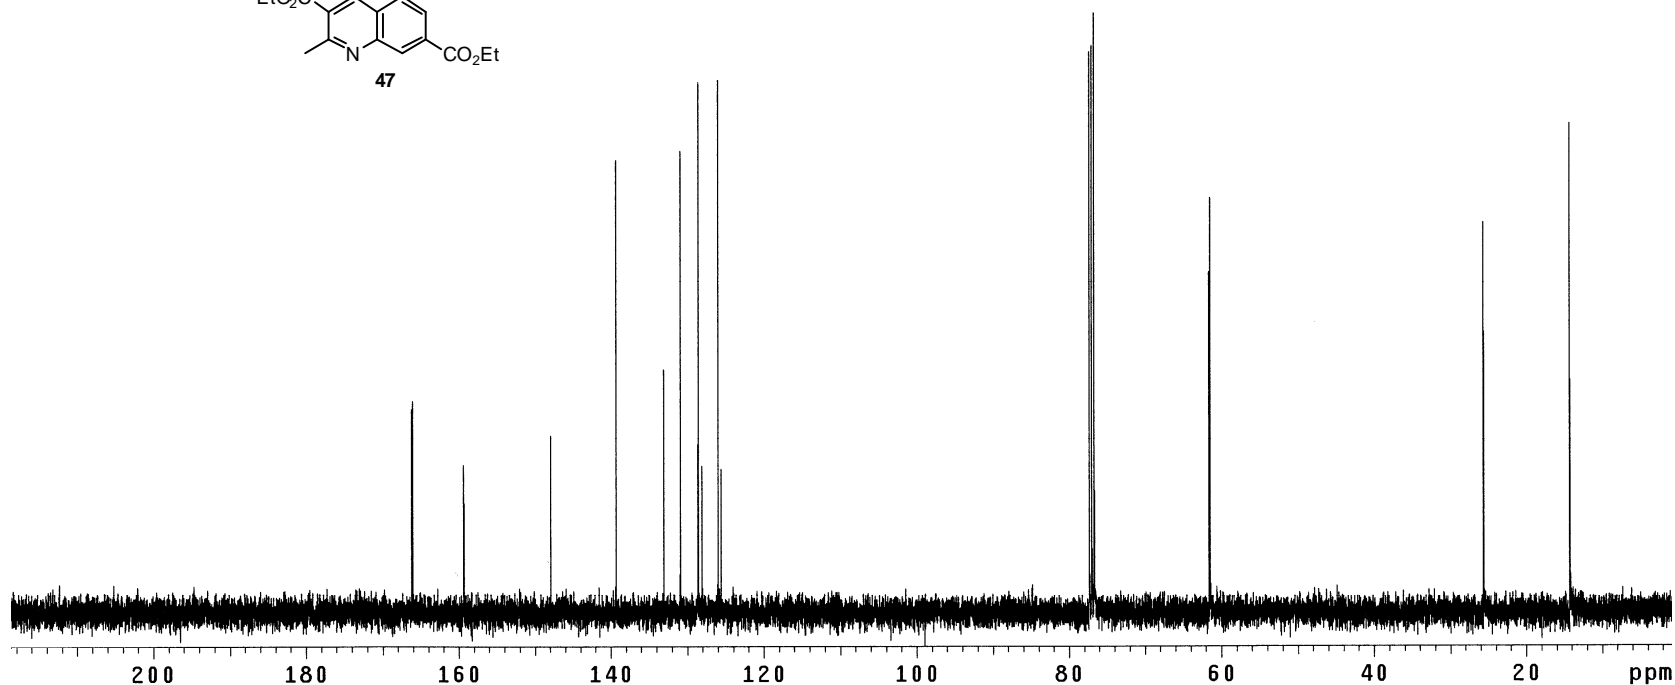

Supplement: c4ob02441a1.pdf [file c4ob02441a1.pdf]
